# Supplementary material for: Coordination chemistry of mercury(ii) halide complexes: a combined experimental, theoretical and (ICSD & CSD) database study on the relationship between inorganic and organic units
Source: Royal Society of Chemistry journal article supplement (doi:10.1039/d0dt01541e), 2020-01-01
Supplement: d0dt01541e1.pdf [file d0dt01541e1.pdf]

# Coordination Chemistry of Mercury (II) Halide complexes: A Combined Experimental, Theoretical and (ICSD & CSD) Database study on the Relationship between Inorganic and Organic Units

Ali Samie<sup>1</sup>, Alireza Salimi\*<sup>1</sup>, Jered C. Garrison<sup>2</sup>

<sup>1</sup>Department of Chemistry, Faculty of Science, Ferdowsi University of Mashhad, Mashhad, Iran

<sup>2</sup>Department of Pharmaceutical Sciences, University of Nebraska Medical Center, 985830, Nebraska, United States

## Supporting Information

### S0. List of Contents

|      |                                                                                                                       |         |
|------|-----------------------------------------------------------------------------------------------------------------------|---------|
| S0.  | List of Contents                                                                                                      | P1      |
| S1.  | General Synthesis Procedure                                                                                           | P2      |
| S2.  | Crystallization Details                                                                                               | P2      |
| S3.  | Instrumentation Details                                                                                               | P2-P3   |
| S4.  | Theoretical Details                                                                                                   | P4      |
| S5.  | Characterization for Complexes 1-11                                                                                   | P4-P8   |
| S6.  | FT-IR transmittance plots for compounds 1-11                                                                          | P8-P14  |
| S7.  | CHN-Elemental Analysis for compounds 1-11                                                                             | P15-P17 |
| S8.  | <sup>13</sup> C-NMR spectrums for compounds 1-11                                                                      | P17-P22 |
| S9.  | <sup>1</sup> H-NMR spectrums for compounds 1-11                                                                       | P22-P29 |
| S10. | TGA and DSC diagrams for compounds 1-11                                                                               | P30-P33 |
| S11. | PXRD patterns for compounds 1-11                                                                                      | P33-P37 |
| S12. | Intermolecular interactions geometrical parameters and energies for complexes 1-11                                    | P37-P39 |
| S13. | Representation of dimer2 (a), dimer3 (b), dimer4 (c), dimer5 (d), dimer7 (e), dimer8 (f), and dimer9 (g) in complex 1 | P40     |
| S14. | Representation of dimer1 (a), dimer2 (b), dimer4 (c), and dimer5 (d) in complex 2                                     | P41     |
| S15. | Representation of dimer1 (a), dimer2 (b), dimer4 (c), and dimer5 (d) in complex 3                                     | P41     |
| S16. | Representation of dimer2 (a) and dimer4 (b) in complex 4                                                              | P42     |
| S17. | Representation of dimer2 (a), dimer4 (b), and dimer5 (c) in complex 5                                                 | P43     |
| S18. | Representation of dimer2 (a), dimer4 (b), and dimer5 (c) in complex 6                                                 | P43     |
| S19. | Representation of dimer1 (a), dimer2 (b), dimer4 (c), and dimer7 (d) in complex 7                                     | P44     |
| S20. | Representation of dimer1 (a), dimer2 (b), dimer4 (c), and dimer7 (d) in complex 8                                     | P44     |
| S21. | Representation of dimer1 in complex 9                                                                                 | P45     |
| S22. | Representation of dimer2 (a) and dimer5 (b) in complex 10                                                             | P45     |
| S23. | Representation of dimer2 (a) and dimer5 (b) in complex 11                                                             | P45     |
| S24. | Dimer binding energy for all of the symmetry operators in complexes 1-11                                              | P46     |
| S25. | References                                                                                                            | P46-P47 |
| S26. | Contents of the CSD-Analysis' for the tables S27, S28, 29                                                             | P47-P48 |
| S27. | CSD-Analysis for HgCl <sub>2</sub> Compounds                                                                          | P48-P70 |
| S28. | CSD-Analysis for HgBr <sub>2</sub> Compounds                                                                          | P70-P80 |
| S29. | CSD-Analysis for HgI <sub>2</sub> Compounds                                                                           | P80-P91 |

### S1. General Synthesis Procedure

To a solution of 0.1 mmol mercuric (II) halide ( $\text{HgX}_2$ , X = Cl, Br) in 10 mL acetonitrile, a solution of 0.2 mmol of L in 10 mL acetonitrile was added with stirring. The Metal to Ligand ratio was 1: 2 except complexes 5 and 6 (1: 1). The mixture was stirred for about 24 hours at the ambient situation and then filtered. The same procedure was done for  $\text{HgI}_2$  in acetone as a solvent. All of the solutions were dried on the ambient situation and recrystallized at room temperature but in different solvents and situations upon different evaporation times. The crystallization solvent(s), crystallization period, crystalline color, and crystalline shape were presented in S2.

### S2. Crystallization Details

| Complex | Crystallization Solvent(s)      | Crystallization Period | Crystalline Color | Crystalline Shape |
|---------|---------------------------------|------------------------|-------------------|-------------------|
| 1       | acetonitrile                    | 2months                | yellow            | coral-shaped      |
| 2       | acetonitrile/methanol (ethanol) | 2months                | white             | coral-shaped      |
| 3       | 3 acetone/methanol              | 2months                | amber             | block             |
| 4       | acetonitrile                    | 2months                | amber             | cubic             |
| 5       | acetone/methanol                | 2months                | amber             | block             |
| 6       | acetone/methanol (ethanol)      | 2months                | amber             | block             |
| 7       | acetonitrile                    | 2months                | amber             | prism             |
| 8       | acetonitrile                    | 2months                | amber             | cubic             |
| 9       | acetonitrile/ethanol/methanol   | 2months                | amber             | prism             |
| 10      | acetonitrile                    | 2months                | amber             | pipe              |
| 11      | acetonitrile/ethanol            | 2months                | amber             | needle            |

### S3. Instrumentation Details

All the reagents and solvents for syntheses and analyses were purchased from either Aldrich or Merck and used without further purification.

**Fourier Transform Infrared Spectroscopy (FTIR)** spectra ( $4000 - 400 \text{ cm}^{-1}$ ) of the solid sample were taken as 1% dispersion in KBr pellets were recorded with an Avatar 370 FTIR Thermal Nicolet spectrometer.

**Elemental Analyses** for C, H and N were performed using a Thermo Finning Flash EA1112 CHNO-S Microanalyzer.

**Differential Scanning Calorimetry (DSC)** was recorded on a Mettler Toledo DSC 823e instrument within a range from 25 to 300 °C with a step size of 0.1 °C/min.

**Thermal Gravimetric Analysis (TGA)** was performed with Mettler Toledo TGA/SDTA 851e within temperature range of 25 to 400 °C with a step size of 0.1 °C/min.

**Nuclear Magnetic Resonance (NMR)** was gathered in DMSO-d<sub>6</sub> as a media by 300MHz Bruker Avance III for both <sup>1</sup>H and <sup>13</sup>C.

**Powder X-Ray Diffraction (PXRD)** data were collected on PANalytical X-ray powder diffractometer equipped with a X'cellerator detector using Cu K $\alpha$  ( $\lambda = 1.54184 \text{ \AA}$ ) at room temperature with the scan range  $2\theta = 5$  to  $50^\circ$  and step size of  $0.026^\circ$ . X'Pert HighScore Plus was used to compare the experimental PXRD pattern with the calculated lines from the crystal structure.

**Single Crystal X-ray Diffraction (SCXRD)** Single crystal X-ray diffraction (SCXRD) data for complexes 1, 2, 3, 4, 5, 6, 8, 10, and 11 crystals were collected at 100(2) K on an Oxford Diffraction Excalibur PX Ultra diffractometer equipped with an Enhance Ultra (Cu) X-ray source and Onyx CCD detector. Data reduction and analysis for these structures were carried out with the CrysAlisPro program v. 1.171.37.35.<sup>1</sup> Diffraction data for 7 and 9 were collected on a Rigaku Mercury 375/M CCD (XtaLAB mini) diffractometer using graphite monochromatic Mo(K $\alpha$ ) radiation ( $0.71075 \text{ \AA}$ ) at 140(2) and 293(2) K, respectively. The data were processed with the Rigaku Crystal Clear 2.0 software.<sup>2</sup> The structures were solved by direct methods<sup>3</sup> and subsequent difference Fourier maps were used for refinement on  $F^2$  by a full-matrix least-squares procedure using anisotropic displacement parameters. The structures were checked for higher symmetry with the help of the program PLATON<sup>4,5</sup> and Mercury 4.0.0 was utilized for molecular representations and packing diagrams. For the title compounds, the non-H atoms were refined anisotropically and H atoms were placed in the ideal positions. The structural resolution

procedure was performed using the WinGX crystallographic software package.<sup>6</sup> Crystallographic data and refinement parameters are shown in table 1.

#### S4. Theoretical Details

Initially the binding energies of the all molecules pairs (dimer) assessed based on both B3LYP-D3 and M06-2X as a DFT dispersion-corrected method with with 6-311G (d, p) (for C, H, O, and N) and lanl2dz (for Hg, Cl, Br, and I) basis sets.<sup>7, 8</sup> The presence of heavy metal, halide anions, and organic ligands, made the theoretical study time-consuming and in this regard it was cost-effective. Since the results for both of the methods were close to each other the theoretical studies were performed by the second method which was faster than the other one. In fact, the results of these two methods were validated compared to each other.<sup>9-12</sup> The calculation of noncovalent interactions from the DFT-D3 new method is particularly reliable where the dispersion component has a significant contribution.<sup>13</sup> For the Basis Set Superposition Error (BSSE) corrections the counterpoise method was used.<sup>14</sup> For the computational studies, input data has taken directly from the crystal structure and H atoms were normalized at their neutron distances (1.08 Å for C–H). All the calculations were performed in the GAMESS program package.<sup>15</sup>

#### S5. Characterization for Complexes 1-11

**Complex 1:** m.p. 194.69°C; IR (KBr disc)  $\text{vcm}^{-1}$ : 2847.67, 2917.14 (C–H stretching in aromatic rings), 1746.77 (C=O stretching), 1596.22, 1508.84 (two couple of peaks for C=C in aromatic rings), 1274.86, 1099.34 (C–O stretching); Anal. Calcd. for  $\text{C}_{32}\text{H}_{22}\text{Cl}_2\text{HgN}_2\text{O}_4$ : C, 49.91; H, 2.88; N, 3.64; Found: C, 49.17; H, 2.91; N, 3.62;  $^1\text{H}$  NMR (300.811 MHz, DMSO, 25°C, ppm)  $\delta$ : 7.6 (m, 4H, H<sub>2</sub>, H<sub>3</sub>, H<sub>4</sub> and H<sub>6</sub>), 7.750 (m, 1H, H<sub>9</sub>), 7.953 (m, 2H, H<sub>7</sub> and H<sub>8</sub>), 8.0575 (d, 1H, H<sub>15</sub>,  $^3\text{J} = 6.4$  Hz with H<sub>14</sub>), 8.6425 (d, 1H, H<sub>14</sub>,  $^3\text{J} = 6.6$  Hz with H<sub>15</sub>), 8.981 (s, 1H, H<sub>16</sub>), 9.438 (s, 1H, H<sub>13</sub>);  $^{13}\text{C}$  NMR (75.65 MHz, DMSO, 25°C, ppm)  $\delta$ : 119.147, 121.481, 124.849, 125.553, 126.236, 126.735, 126.822, 127.245, 127.436, 128.543, 134.673, 138.482, 146.558, 151.100, 154.762, 164.196.

**Complex 2:** m.p. 191.64°C; IR (KBr disc)  $\text{vcm}^{-1}$ : 2847.17, 2920.73 (C–H stretching in aromatic rings), 1746.30 (C=O stretching), 1596.28, 1508.99, 1462.40 (two couple of peaks for C=C in aromatic rings), 1274.75, 1099.28 (C–O stretching); Anal. Calcd. for  $\text{C}_{32}\text{H}_{22}\text{Br}_2\text{HgN}_2\text{O}_4$ : C, 44.75; H,



2.58; N, 3.26; Found: C, 44.67; H, 2.59; N, 3.19;  $^1\text{H}$  NMR (300.811 MHz, DMSO, 25°C, ppm)  $\delta$ : 7.6 (m, 4H, H<sub>2</sub>, H<sub>3</sub>, H<sub>4</sub> and H<sub>6</sub>), 7.7565 (dd, 1H, H<sub>9</sub>,  $^3J = 7.6$  Hz with H<sub>8</sub> and  $^4J = 4.8$  Hz with H<sub>7</sub>), 7.9535 (m, 2H, H<sub>7</sub> and H<sub>8</sub>), 8.058 (d, 1H, H<sub>15</sub>,  $^3J = 7.3$  Hz with H<sub>14</sub>), 8.6475 (d, 1H, H<sub>14</sub>,  $^3J = 7.9$  Hz with H<sub>15</sub>), 8.983 (s, 1H, H<sub>16</sub>), 9.438 (s, 1H, H<sub>13</sub>);  $^{13}\text{C}$  NMR (75.65 MHz, DMSO, 25°C, ppm)  $\delta$ : 119.148, 121.489, 124.890, 125.561, 126.238, 126.730, 126.824, 127.250, 127.439, 128.542, 134.670, 138.534, 146.554, 151.080, 154.739, 164.179.

**Complex 3:** m.p. 157.70°C; IR (KBr disc)  $\text{vcm}^{-1}$ : 2847.67, 2917.14 (C–H stretching in aromatic rings), 1744.09 (C=O stretching), 1634.05 (C=N in pyrazine ring), 1594.99, 1507.86, 1461.24 (two couple of peaks for C=C in aromatic rings), 1273.92, 1098.46 (C–O stretching); Anal. Calcd. for  $\text{C}_{32}\text{H}_{22}\text{I}_2\text{HgN}_2\text{O}_4$ : C, 40.33; H, 2.33; N, 2.94; Found: C, 40.12; H, 2.28; N, 2.95;  $^1\text{H}$  NMR (300.811 MHz, DMSO, 25°C, ppm)  $\delta$ : 7.6 (m, 4H, H<sub>2</sub>, H<sub>3</sub>, H<sub>4</sub> and H<sub>6</sub>), 7.753 (m, 1H, H<sub>9</sub>), 7.959 (m, 2H, H<sub>7</sub> and H<sub>8</sub>), 8.0555 (d, 1H, H<sub>15</sub>,  $^3J = 6.8$  Hz with H<sub>14</sub>), 8.6425 (d, 1H, H<sub>14</sub>,  $^3J = 6.8$  Hz with H<sub>15</sub>), 8.980 (s, 1H, H<sub>16</sub>), 9.436 (s, 1H, H<sub>13</sub>);  $^{13}\text{C}$  NMR (75.65 MHz, DMSO, 25°C, ppm)  $\delta$ : 119.144, 121.499, 124.890, 125.592, 126.238, 126.731, 126.821, 127.250, 127.436, 128.542, 134.667, 138.528, 146.553, 151.010, 154.667, 164.168.

**Complex 4:** m.p. 174.53 °C; IR (KBr disc)  $\text{vcm}^{-1}$ : 2850.09, 2920.01 (C–H stretching in aromatic rings), 1743.38 (C=O stretching) 1628.23 (C=N in pyrazine ring), 1595.27, 1582.31, 1507.76 (C=C in aromatic rings), 1281.04, 1157.63 (C–O stretching); Anal. Calcd. for  $\text{C}_{32}\text{H}_{22}\text{Cl}_2\text{HgN}_2\text{O}_4$ : C, 49.91; H, 2.88; N, 3.64; Found: C, 49.15; H, 3.73; N, 3.52;

$^1\text{H}$  NMR (300.811 MHz, DMSO, 25°C, ppm)  $\delta$ : 7.5215 (dd, 1H, H<sub>3</sub>,  $^3J = 8.9$  Hz with H<sub>4</sub>,  $^4J = 2.4$  Hz with H<sub>1</sub>), 7.587 (m, 2H, H<sub>7</sub> and H<sub>8</sub>), 7.757 (s, 1H, H<sub>15</sub>), 7.9025 (d, 1H, H<sub>1</sub>,  $^4J = 2.2$  Hz with H<sub>3</sub>), 7.9735 (dd, 1H, H<sub>9</sub>,  $^3J = 6$  Hz with H<sub>8</sub>,  $^4J = 2.5$  Hz with H<sub>7</sub>), 8.0145 (dd, 1H, H<sub>6</sub>,  $^3J = 6$  Hz with H<sub>7</sub>,  $^4J = 2.5$  Hz with H<sub>8</sub>), 8.0635 (d, 1H, H<sub>4</sub>,  $^3J = 8.9$  Hz with H<sub>3</sub>), 8.576 (d, 1H, H<sub>14</sub>,  $^3J = 7.9$  Hz with H<sub>15</sub>), 8.991 (s, 1H, H<sub>16</sub>), 9.399 (s, 1H, H<sub>13</sub>);  $^{13}\text{C}$  NMR (75.65 MHz, DMSO, 25°C, ppm)  $\delta$ : 119.213, 121.967, 124.881, 124.139, 126.524, 127.318, 128.051, 128.253, 129.971, 131.670, 133.776, 138.402, 148.490, 150.967, 154.610, 164.232.

**Complex 5:** m.p. 183.44 °C; IR (KBr disc)  $\text{vcm}^{-1}$ : 2847.67, 2929.40 (C–H stretching in aromatic rings), 1738.20 (C=O stretching), 1625.88 (C=N in pyrazine ring), 1597.92, 1578.77, 1478.77 (C=C in aromatic rings), 1284.20, 1156.22 (C–O stretching); Anal. Calcd. for  $\text{C}_{16}\text{H}_{11}\text{Br}_2\text{HgNO}_2$ : C, 31.52;

H, 1.82; N, 2.30; Found: C, 30.98; H, 1.87; N, 2.51;  $^1\text{H}$  NMR (300.811 MHz, DMSO, 25°C, ppm)  $\delta$ : 7.5285 (dd, 1H, H<sub>3</sub>,  $^3\text{J} = 8.7$  Hz with H<sub>4</sub>,  $^4\text{J} = 1.6$  Hz with H<sub>1</sub>), 7.590 (m, 2H, H<sub>7</sub> and H<sub>8</sub>), 7.772 (dd, 1H, H<sub>15</sub>,  $^3\text{J} = 6.9$  Hz with H<sub>14</sub>,  $^4\text{J} = 4.4$  Hz with H<sub>16</sub>), 7.905 (s, 1H, H<sub>1</sub>,  $^4\text{J} = 2.2$  Hz with H<sub>3</sub>), 7.9745 (d, 1H, H<sub>9</sub>,  $^3\text{J} = 8.7$  Hz with H<sub>8</sub>), 8.0175 (d, 1H, H<sub>6</sub>,  $^3\text{J} = 8.8$  Hz with H<sub>7</sub>), 8.066 (d, 1H, H<sub>4</sub>,  $^3\text{J} = 8.9$  Hz with H<sub>3</sub>), 8.5975 (d, 1H, H<sub>14</sub>,  $^3\text{J} = 7.8$  Hz with H<sub>15</sub>), 8.972 (s, 1H, H<sub>16</sub>), 9.384 (s, 1H, H<sub>13</sub>);  $^{13}\text{C}$  NMR (75.65 MHz, DMSO, 25°C, ppm)  $\delta$ : 119.204, 121.941, 125.101, 126.069, 126.532, 127.321, 128.051, 128.251, 129.976, 131.666, 133.763, 138.717, 148.467, 150.843, 154.427, 164.087.

**Complex 6:** m.p. 146.35 °C; IR (KBr disc)  $\text{vcm}^{-1}$ : 2847.17, 2924.82 (C–H stretching in aromatic rings), 1737.21 (C=O stretching), 1625.22 (C=N in pyrazine ring), 1597.53, 1509.07 (C=C in aromatic rings), 1280.69, 1154.77 (C–O stretching); Anal. Calcd. for C<sub>16</sub>H<sub>11</sub>I<sub>2</sub>HgNO<sub>2</sub>: C, 27.31; H, 1.58; N, 2.0; Found: C, 28.24; H, 1.78; N, 3.0;  $^1\text{H}$  NMR (300.811 MHz, DMSO, 25°C, ppm)  $\delta$ : 7.566 (dd, 1H, H<sub>3</sub>,  $^3\text{J} = 8.9$  Hz with H<sub>4</sub>,  $^4\text{J} = 2.4$  Hz with H<sub>1</sub>), 7.616 (m, 2H, H<sub>7</sub> and H<sub>8</sub>), 7.778 (dd, 1H, H<sub>15</sub>,  $^3\text{J} = 7.4$  Hz with H<sub>14</sub>,  $^4\text{J} = 5.2$  Hz with H<sub>16</sub>), 7.9325 (d, 1H, H<sub>1</sub>,  $^4\text{J} = 2.2$  Hz with H<sub>3</sub>), 8.0015 (dd, 1H, H<sub>9</sub>,  $^3\text{J} = 6$  Hz with H<sub>8</sub>,  $^4\text{J} = 2.5$  Hz with H<sub>7</sub>), 8.0425 (dd, 1H, H<sub>6</sub>,  $^3\text{J} = 6$  Hz with H<sub>7</sub>,  $^4\text{J} = 2.5$  Hz with H<sub>8</sub>), 8.092 (d, 1H, H<sub>4</sub>,  $^3\text{J} = 8.9$  Hz with H<sub>3</sub>), 8.608 (d, 1H, H<sub>14</sub>,  $^3\text{J} = 7.9$  Hz with H<sub>15</sub>), 8.977 (d, 1H, H<sub>16</sub>,  $^3\text{J} = 2.4$  Hz with H<sub>15</sub>), 9.379 (s, 1H, H<sub>13</sub>);  $^{13}\text{C}$  NMR (75.65 MHz, DMSO, 25°C, ppm)  $\delta$ : 119.216, 121.966, 124.917, 125.899, 126.533, 127.328, 128.054, 128.256, 129.974, 131.664, 133.767, 138.533, 148.476, 150.801, 154.440, 164.140.

**Complex 7:** m.p. 137.16, 150.23 °C; IR (KBr disc)  $\text{vcm}^{-1}$ : 3007.04, 2924.61, 2855.85 (C–H stretching in aromatic rings), 1752.53 (C=O stretching), 1598.62, 1508.02, 1462.43 (two couple of peaks for C=C in aromatic rings), 1306.38, 1136.00 (C–O stretching); Anal. Calcd. for C<sub>30</sub>H<sub>20</sub>Cl<sub>2</sub>HgN<sub>4</sub>O<sub>4</sub>: C, 46.67; H, 2.61; N, 7.26; Found: C, 45.98; H, 2.74; N, 7.02;  $^1\text{H}$  NMR (300.811 MHz, DMSO, 25°C, ppm)  $\delta$ : 7.615 (m, 4H, H<sub>2</sub>, H<sub>3</sub>, H<sub>4</sub> and H<sub>6</sub>), 7.9635 (d, 1H, H<sub>7</sub>,  $^4\text{J} = 8$  Hz with H<sub>8</sub>), 8.016 (d, 1H, H<sub>8</sub>,  $^3\text{J} = 7.9$  Hz with H<sub>7</sub>), 8.0655 (d, 1H, H<sub>9</sub>,  $^3\text{J} = 7.5$  Hz with H<sub>8</sub>), 9.000 (s, 1H, H<sub>14</sub>), 9.050 (s, 1H, H<sub>15</sub>), 9.534 (s, 1H, H<sub>13</sub>);  $^{13}\text{C}$  NMR (75.65 MHz, DMSO, 25°C, ppm): 118.988, 121.559, 126.263, 126.612, 126.890, 127.294, 127.431, 128.524, 134.685, 142.947, 145.589, 146.607, 146.861, 149.179, 163.063.

**Complex 8:** m.p. 125.85, 135.75 °C; IR (KBr disc)  $\text{vcm}^{-1}$ : 3007.04, 2921.23, 2851.76 (C–H stretching in aromatic rings), 1734.54 (C=O stretching), 1599.45, 1507.38 (two couple of peaks for C=C in aromatic rings), 1309.80, 1130.84 (C–O stretching); Anal. Calcd. for C<sub>30</sub>H<sub>20</sub>Br<sub>2</sub>HgN<sub>4</sub>O<sub>4</sub>: C, 41.85; H,

2.34; N, 6.51; Found: C, 41.57; H, 2.61; N, 5.95;  $^1\text{H}$  NMR (300.811 MHz, DMSO, 25°C, ppm)  $\delta$ : 7.615 (m, 4H, H<sub>2</sub>, H<sub>3</sub>, H<sub>4</sub> and H<sub>6</sub>), 7.964 (d, 1H, H<sub>7</sub>,  $^4J = 8$  Hz with H<sub>8</sub>), 8.0175 (d, 1H, H<sub>8</sub>,  $^3J = 7.6$  Hz with H<sub>7</sub>), 8.067 (d, 1H, H<sub>9</sub>,  $^3J = 7.8$  Hz with H<sub>8</sub>), 9.000 (s, 1H, H<sub>14</sub>), 9.0525 (d, 1H, H<sub>15</sub>,  $^3J = 2.2$  Hz with H<sub>14</sub>), 9.535 (s, 1H, H<sub>13</sub>);  $^{13}\text{C}$  NMR (75.65 MHz, DMSO, 25°C, ppm): 118.989, 121.563, 126.264, 126.612, 126.890, 127.296, 127.432, 128.524, 134.684, 142.949, 145.588, 146.607, 146.867, 149.181, 163.061.

**Complex 9:** m.p. 89.61, 94.65 °C; IR (KBr disc)  $\text{vcm}^{-1}$ : 3011.12, 2953.92, 2851.76 (C–H stretching in aromatic rings), 1736.14 (C=O stretching), 1597.92, 1506.78, 1460.72 (two couple of peaks for C=C in aromatic rings), 1312.30, 1128.39 (C–O stretching); Anal. Calcd. for  $\text{C}_{30}\text{H}_{20}\text{I}_2\text{HgN}_4\text{O}_4$ : C, 37.73; H, 2.11; N, 5.87; Found: C, 38.29; H, 2.28; N, 5.86;  $^1\text{H}$  NMR (300.811 MHz, DMSO, 25°C, ppm)  $\delta$ : 7.614 (m, 4H, H<sub>2</sub>, H<sub>3</sub>, H<sub>4</sub> and H<sub>6</sub>), 7.9625 (d, 1H, H<sub>7</sub>,  $^4J = 8$  Hz with H<sub>8</sub>), 8.0165 (d, 1H, H<sub>8</sub>,  $^3J = 8$  Hz with H<sub>7</sub>), 8.0655 (d, 1H, H<sub>9</sub>,  $^3J = 7.5$  Hz with H<sub>8</sub>), 8.999 (s, 1H, H<sub>14</sub>), 9.049 (s, 1H, H<sub>15</sub>), 9.534 (s, 1H, H<sub>13</sub>);  $^{13}\text{C}$  NMR (75.65 MHz, DMSO, 25°C, ppm): 118.987, 121.566, 126.266, 126.613, 126.891, 127.298, 127.433, 128.525, 134.683, 142.949, 145.590, 146.606, 146.868, 149.179, 163.057.

**Complex 10:** m.p. 167.68 °C; IR (KBr disc)  $\text{vcm}^{-1}$ : 2850.45, 2926.80 (C–H stretching in aromatic rings), 1764.48 (C=O stretching), 1627.05 (C=N in pyrazine ring), 1579.78, 1507.61, 1462.43 (two couple of peaks for C=C in aromatic rings), 1303.85, 1156.62 (C–O stretching); Anal. Calcd. for  $\text{C}_{30}\text{H}_{20}\text{Cl}_2\text{HgN}_4\text{O}_4$ : C, 46.67; H, 2.61; N, 7.26; Found: C, 47.03; H, 3.08; N, 7.17;  $^1\text{H}$  NMR (300.811 MHz, DMSO, 25°C, ppm)  $\delta$ : 7.533 (d, 1H, H<sub>3</sub>,  $^4J = 2.4$  Hz with H<sub>1</sub>), 7.581 (m, 2H, H<sub>7</sub> and H<sub>8</sub>), 7.9115 (d, 1H, H<sub>1</sub>,  $^4J = 2.2$  Hz with H<sub>3</sub>), 7.975 (dd, 1H, H<sub>9</sub>,  $^3J = 7.3$  Hz with H<sub>8</sub>,  $^4J = 3$  Hz with H<sub>7</sub>), 8.0075 (dd, 1H, H<sub>6</sub>,  $^3J = 7.2$  Hz with H<sub>7</sub>,  $^4J = 3.2$  Hz with H<sub>8</sub>), 8.0665 (d, 1H, H<sub>4</sub>,  $^3J = 8.9$  Hz with H<sub>3</sub>), 8.9535 (dd, 1H, H<sub>14</sub>,  $^3J = 2.4$  Hz with H<sub>15</sub>,  $^4J = 1.6$  Hz with H<sub>13</sub>), 9.0125 (d, 1H, H<sub>15</sub>,  $^3J = 2.4$  Hz with H<sub>14</sub>), 9.461 (d, 1H, H<sub>13</sub>,  $^4J = 1.3$  Hz with H<sub>14</sub>);  $^{13}\text{C}$  NMR (75.65 MHz, DMSO, 25°C, ppm)  $\delta$ : 119.101, 121.787, 126.559, 127.333, 128.082, 128.257, 130.055, 131.701, 133.778, 143.045, 145.520, 146.716, 148.522, 149.056, 163.044.

**Complex 11:** m.p. 163.09 °C; IR (KBr disc)  $\text{vcm}^{-1}$ : 2851.76, 2926.71 (C–H stretching in aromatic rings), 1764.23 (C=O stretching) 1626.76 (C=N in pyrazine ring), 1600.93, 1579.67, 1507.55 (two couple of peaks for C=C in aromatic rings), 1303.05, 1155.40 (C–O stretching); Anal. Calcd. for  $\text{C}_{30}\text{H}_{20}\text{Br}_2\text{HgN}_4\text{O}_4$ : C, 41.85; H, 2.34; N, 6.51; Found: C, 42.51; H, 2.72; N, 6.38;  $^1\text{H}$  NMR (300.811 MHz, DMSO, 25°C, ppm)  $\delta$ : 7.5325 (d, 1H, H<sub>3</sub>,  $^4J = 2.4$  Hz with H<sub>1</sub>), 7.580 (m, 2H, H<sub>7</sub> and H<sub>8</sub>), 7.9105

(d, 1H, H<sub>1</sub>, <sup>4</sup>J = 2 Hz with H<sub>3</sub>), 7.991 (m, 2H, H<sub>9</sub> and H<sub>6</sub>), 8.065 (d, 1H, H<sub>4</sub>, <sup>3</sup>J = 9 Hz with H<sub>3</sub>), 8.953 (m, 1H, H<sub>14</sub>), 9.0115 (d, 1H, H<sub>15</sub>, <sup>3</sup>J = 2.4 Hz with H<sub>14</sub>), 9.461 (d, 1H, H<sub>13</sub>, <sup>4</sup>J = 1.1 Hz with H<sub>14</sub>); <sup>13</sup>C NMR (75.65 MHz, DMSO, 25°C, ppm) δ: 119.101, 121.786, 126.560, 127.333, 128.079, 128.255, 130.052, 131.699, 133.777, 143.044, 145.516, 146.720, 148.520, 149.053, 163.039.

### S6. FT-IR transmittance plots for compounds 1-11

Complex 1

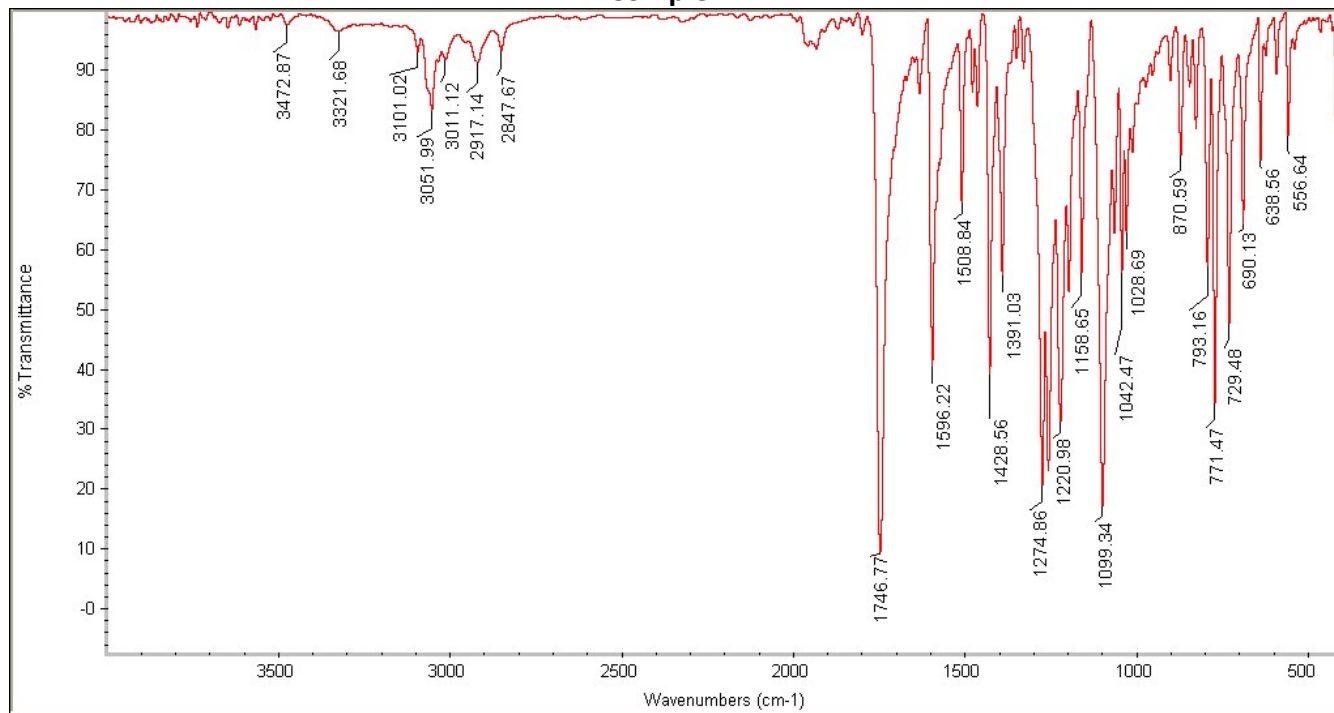

Complex 2

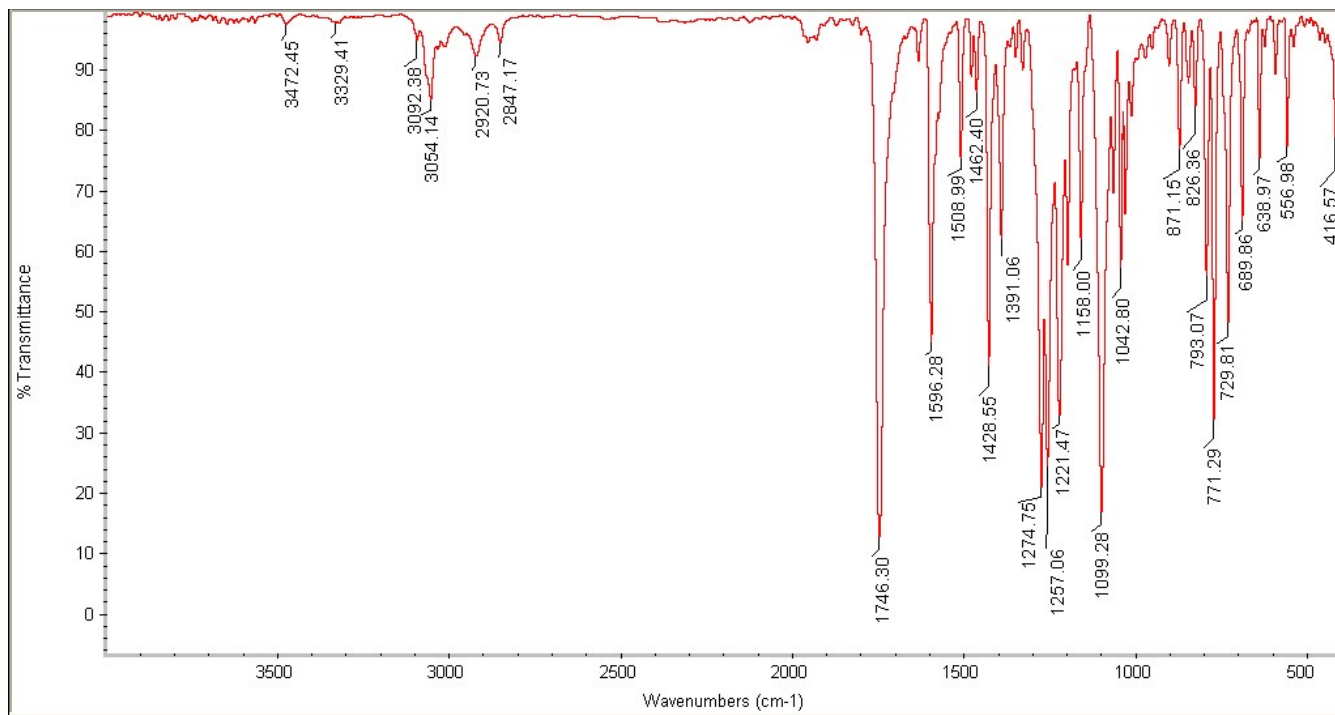

**Complex 3**

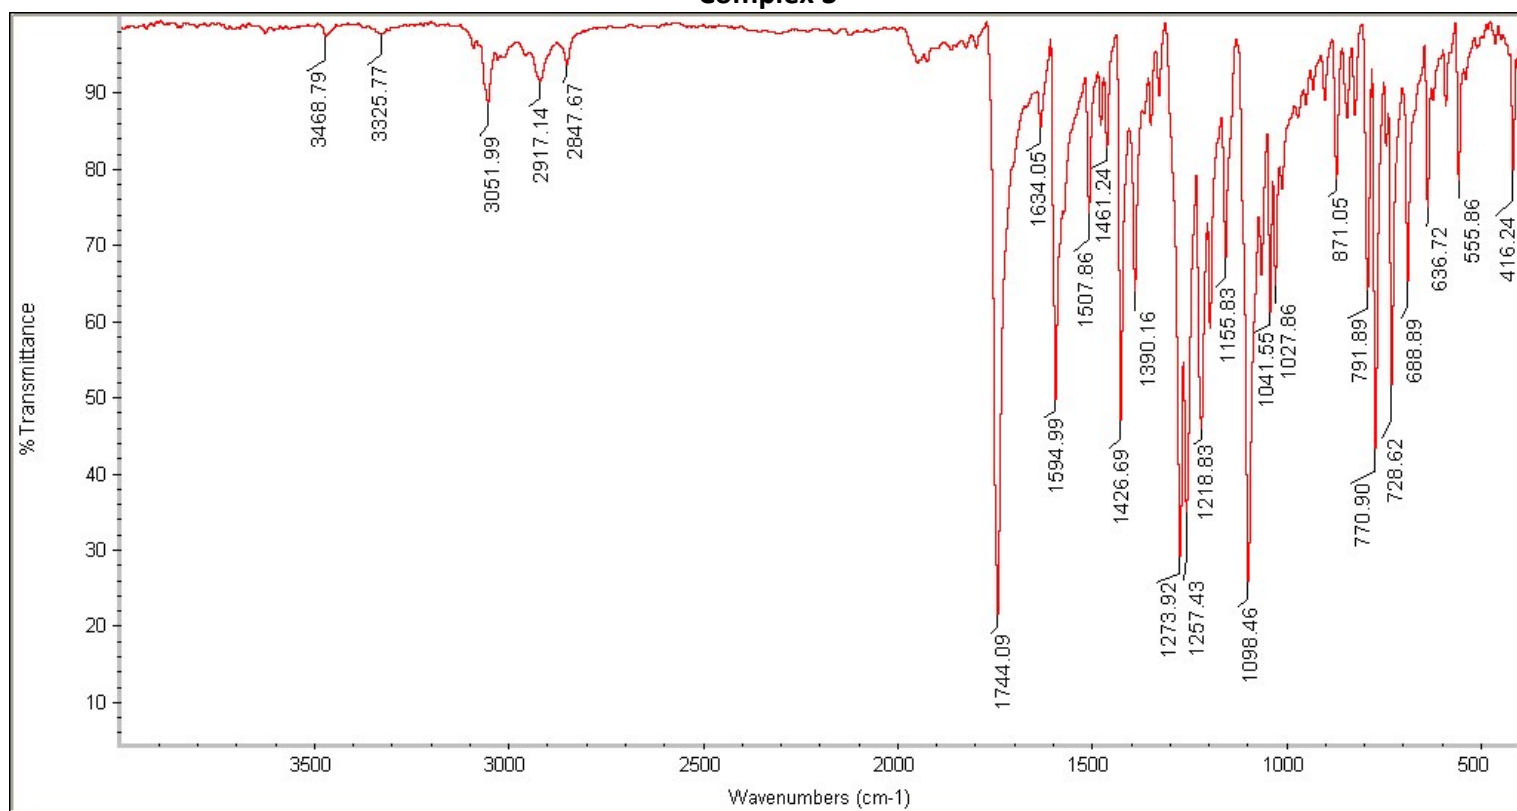

**Complex 4**

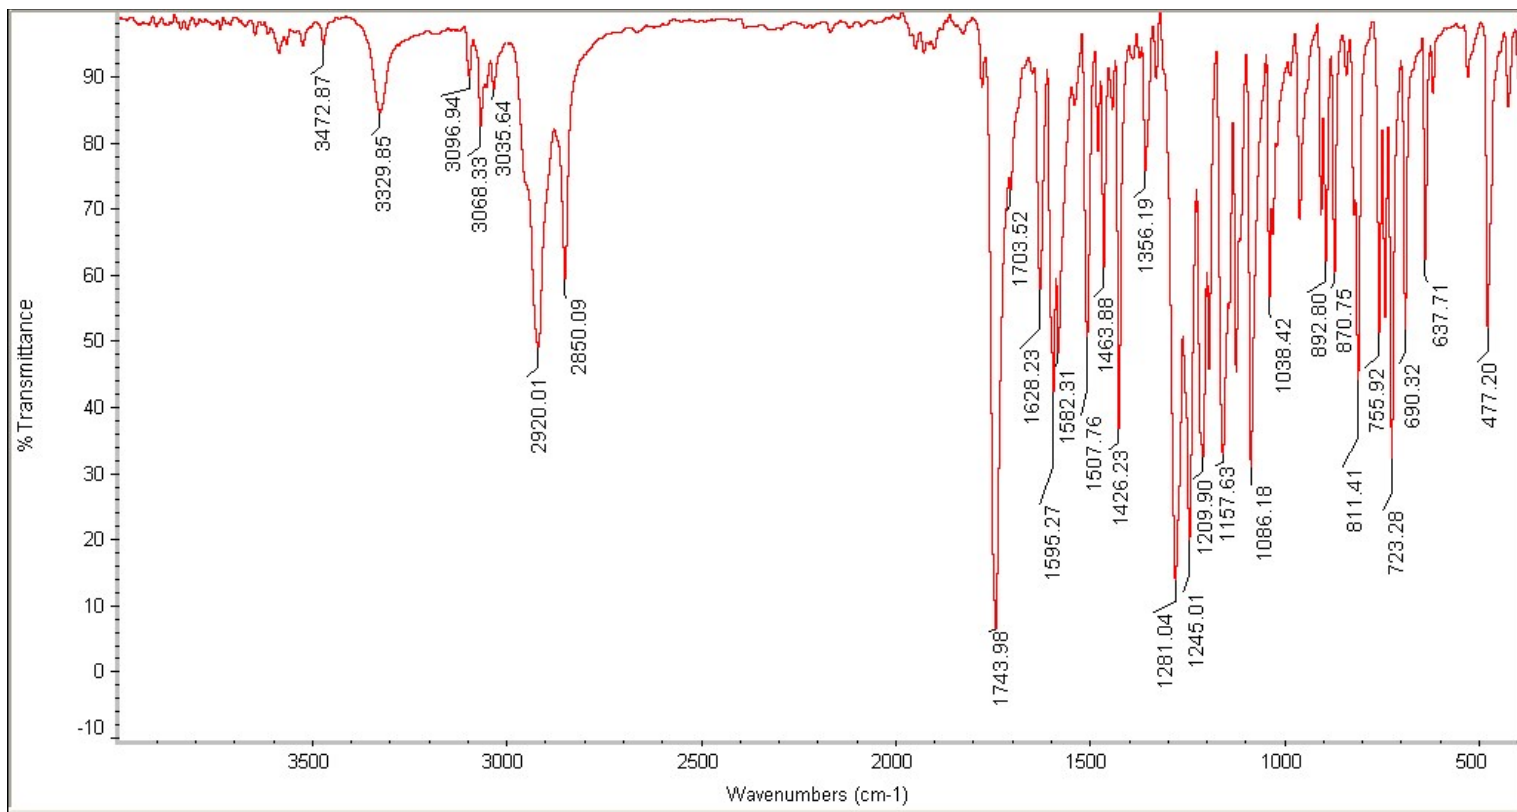

**Complex 5**

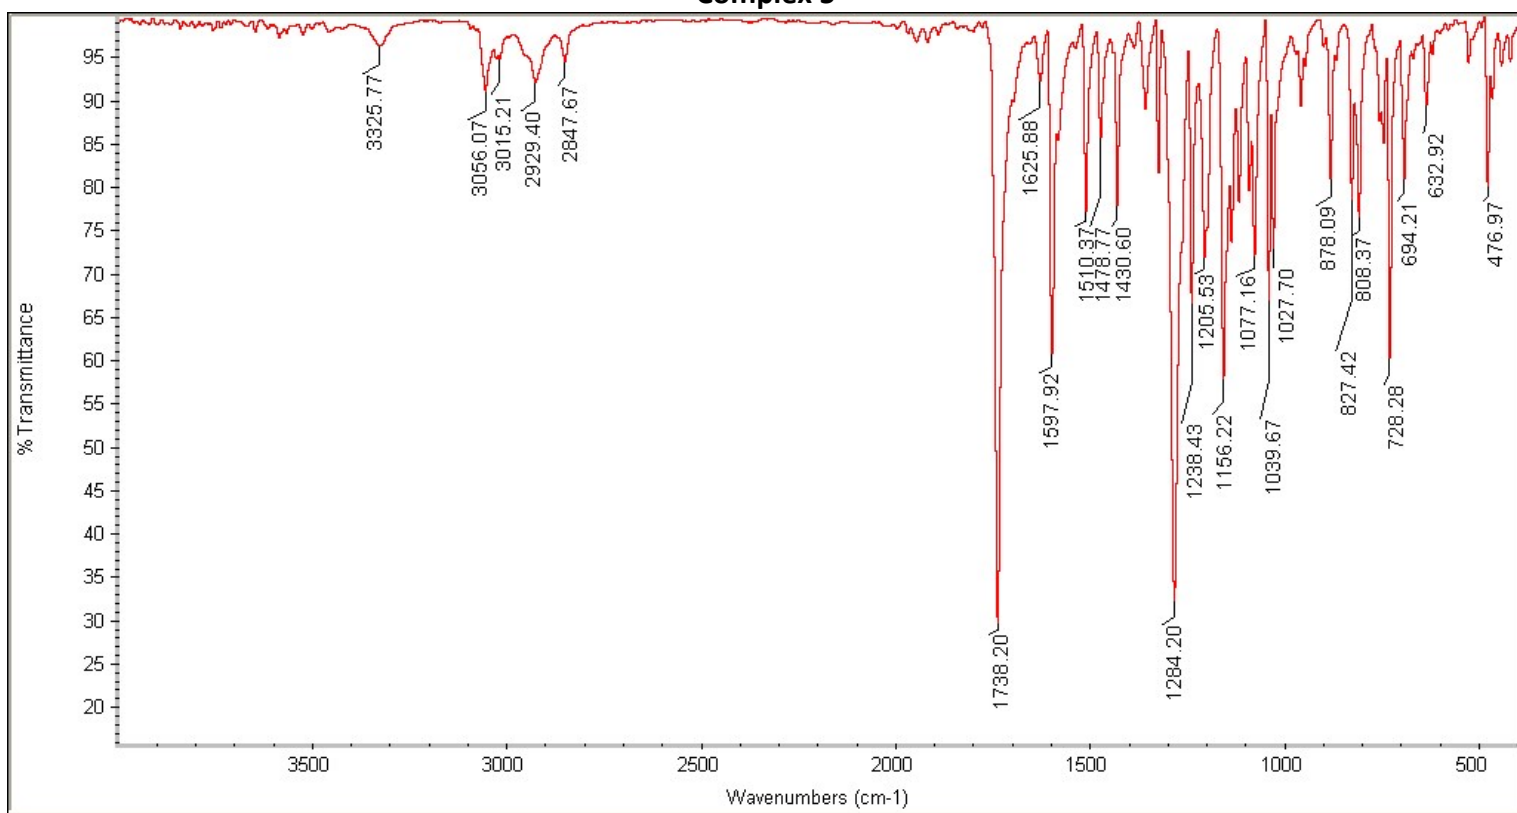

**Complex 6**

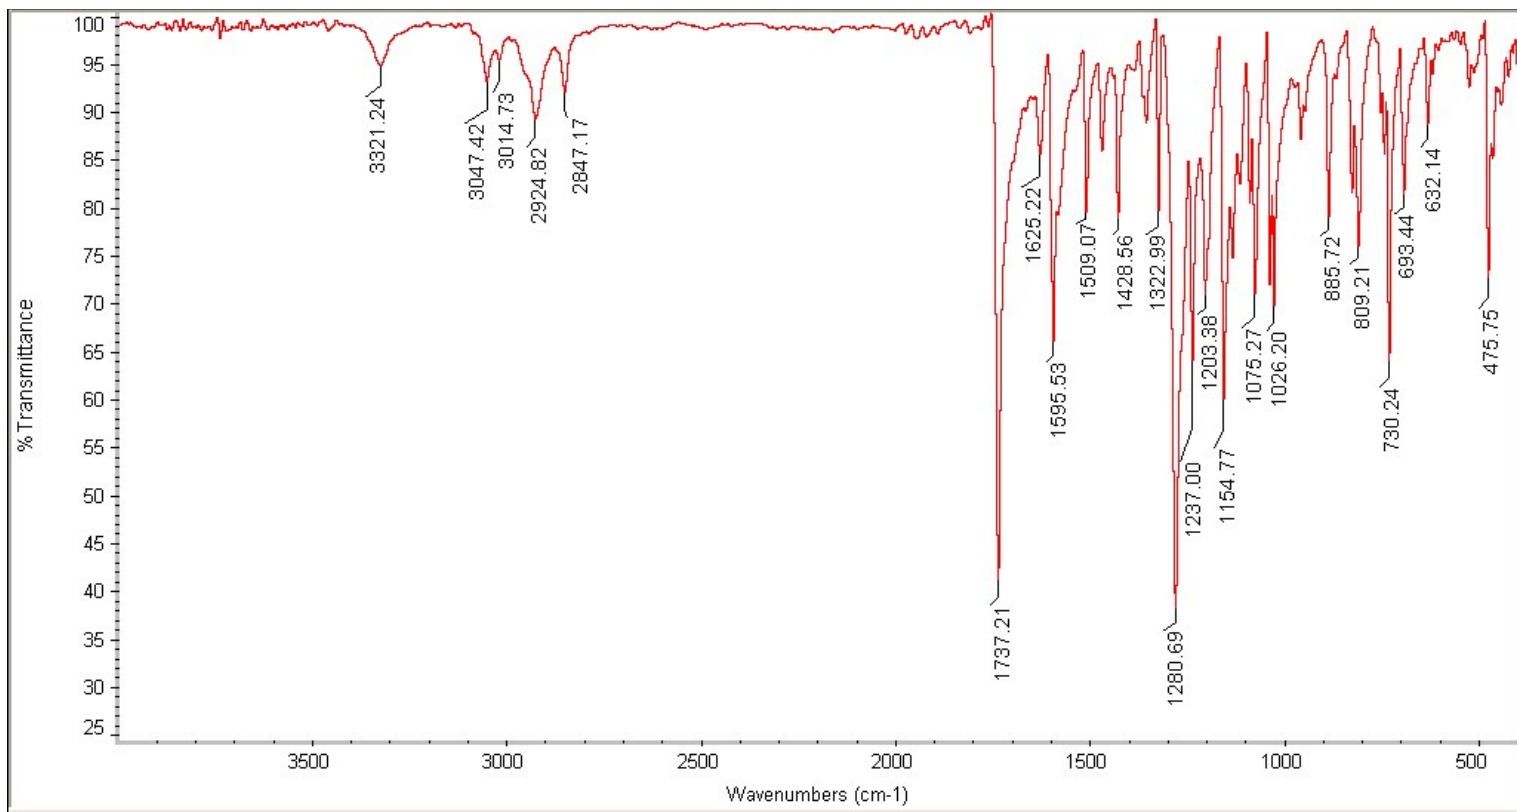

**Complex 7 (1:2)**

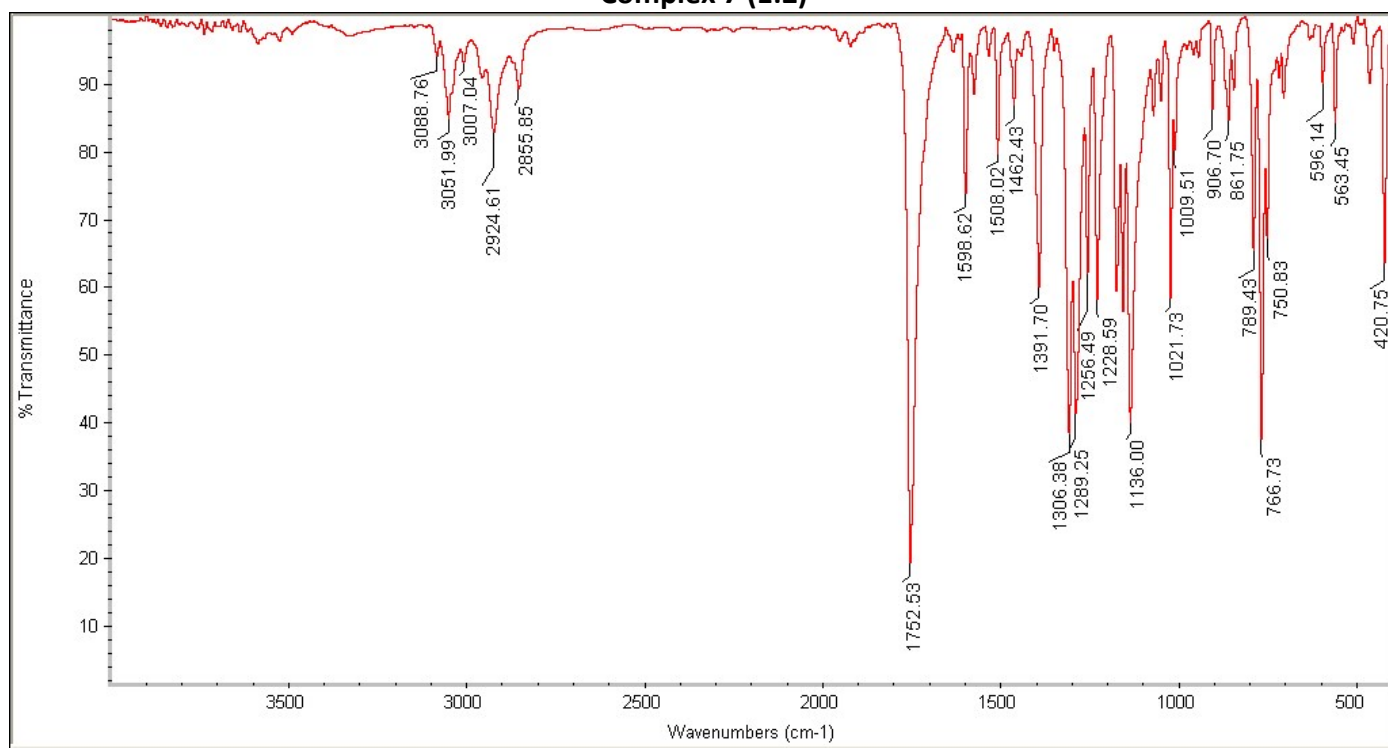

**Complex 7' (1:1)**

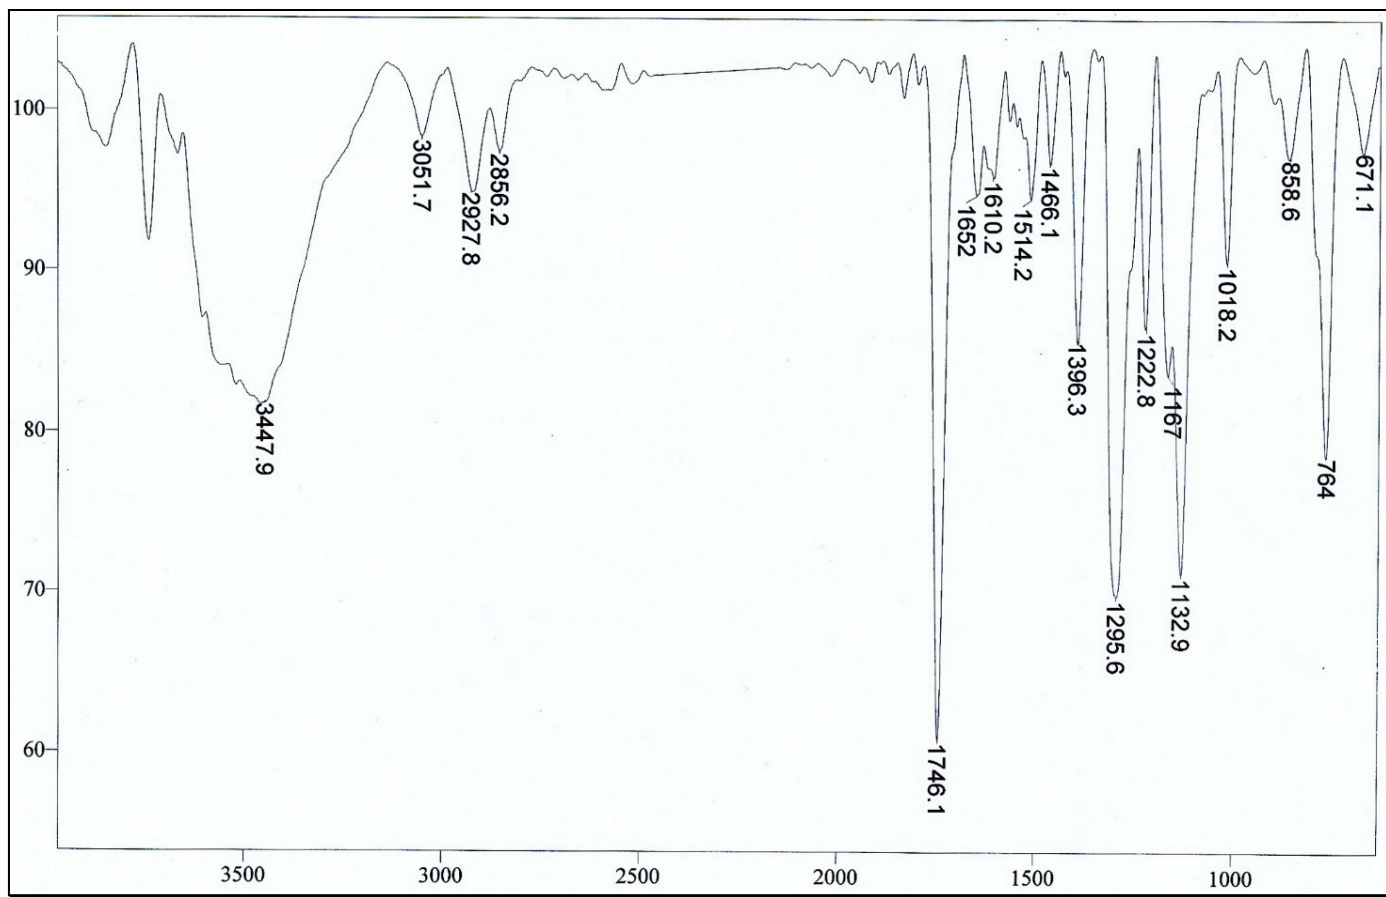

**Complex 8 (1:2)**

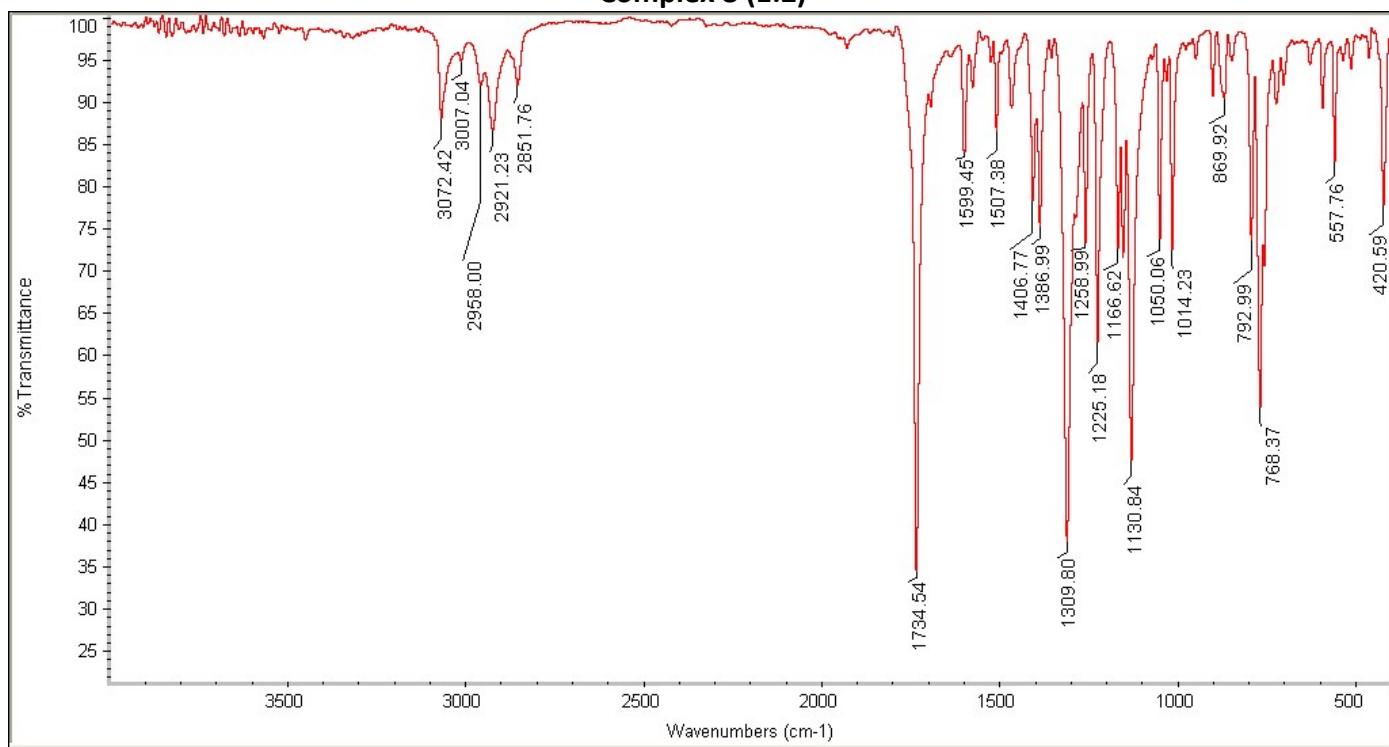

**Complex 8' (1:1)**



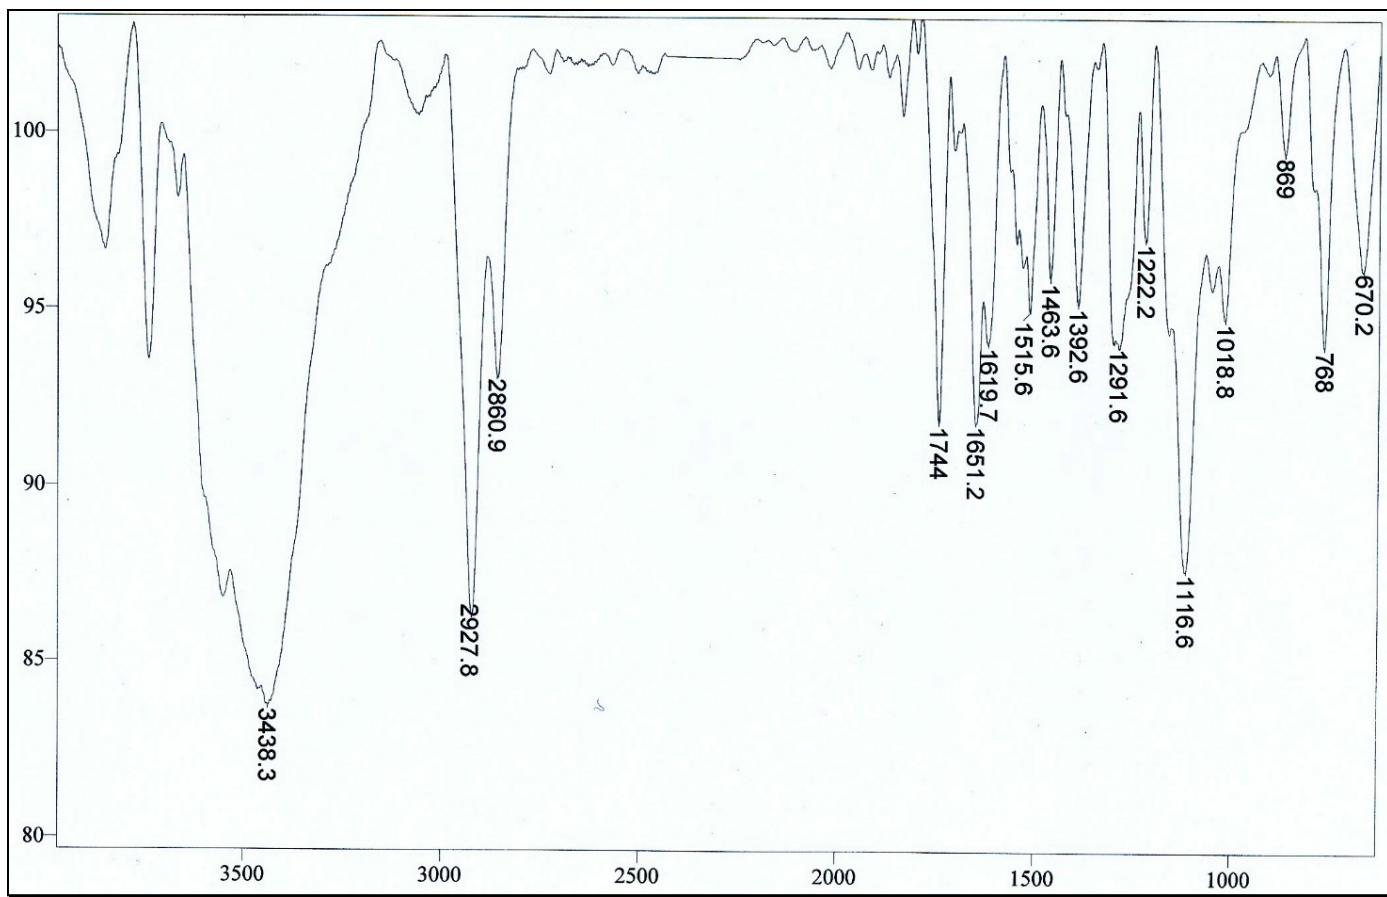

**Complex 9 (1:2)**

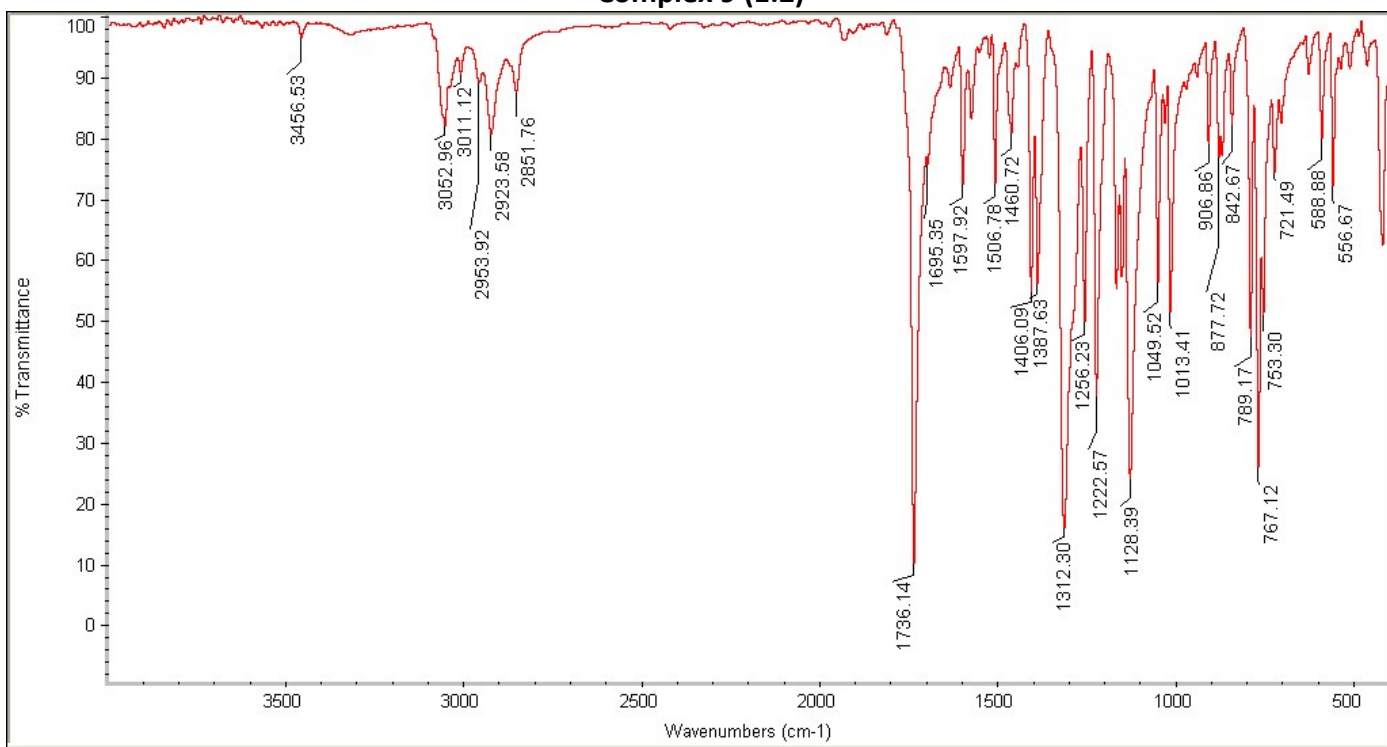

**Complex 9' (1:1)**

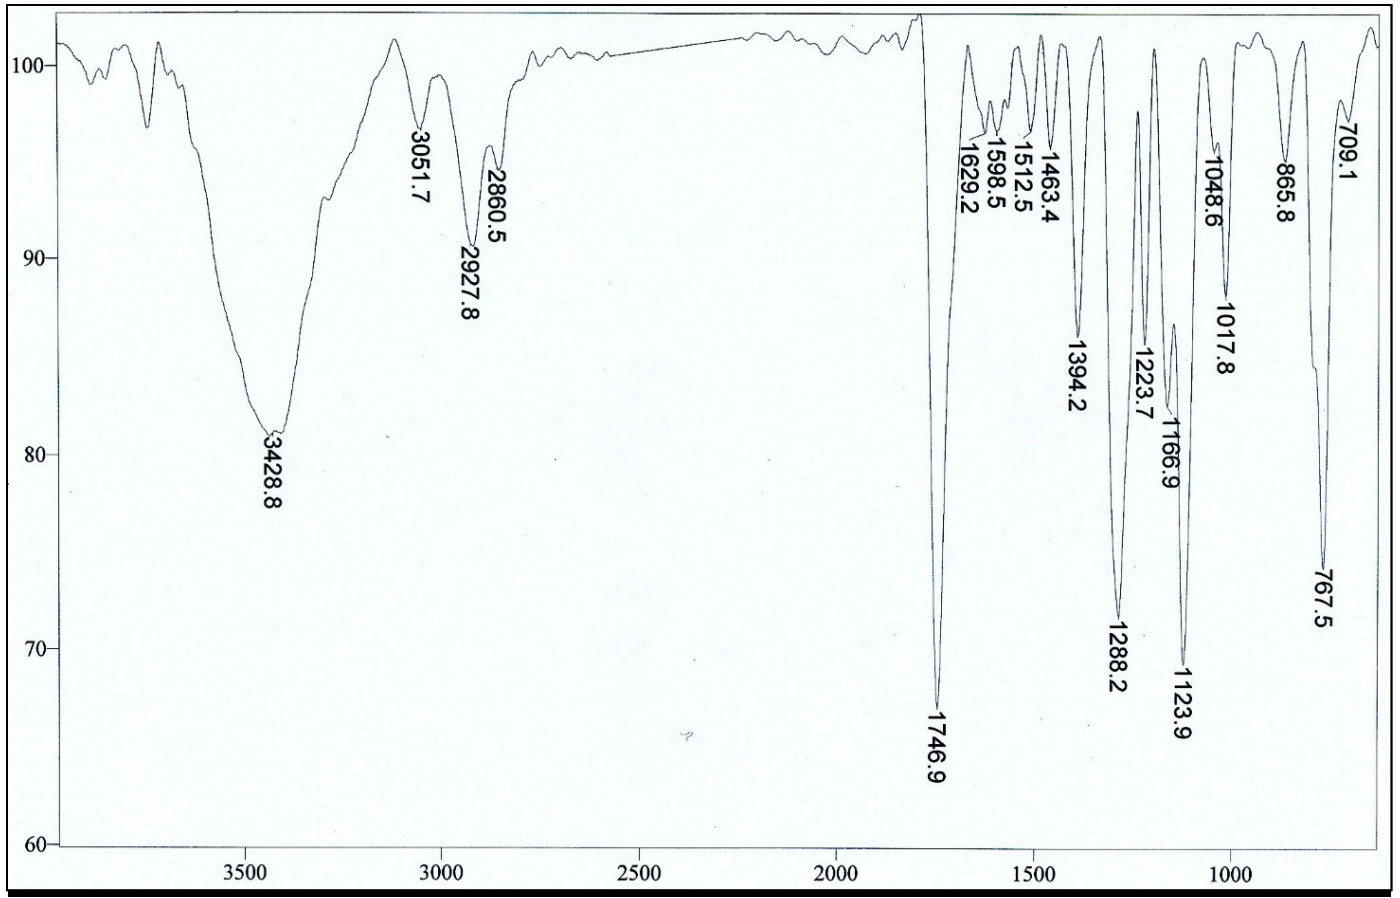

Complex 10

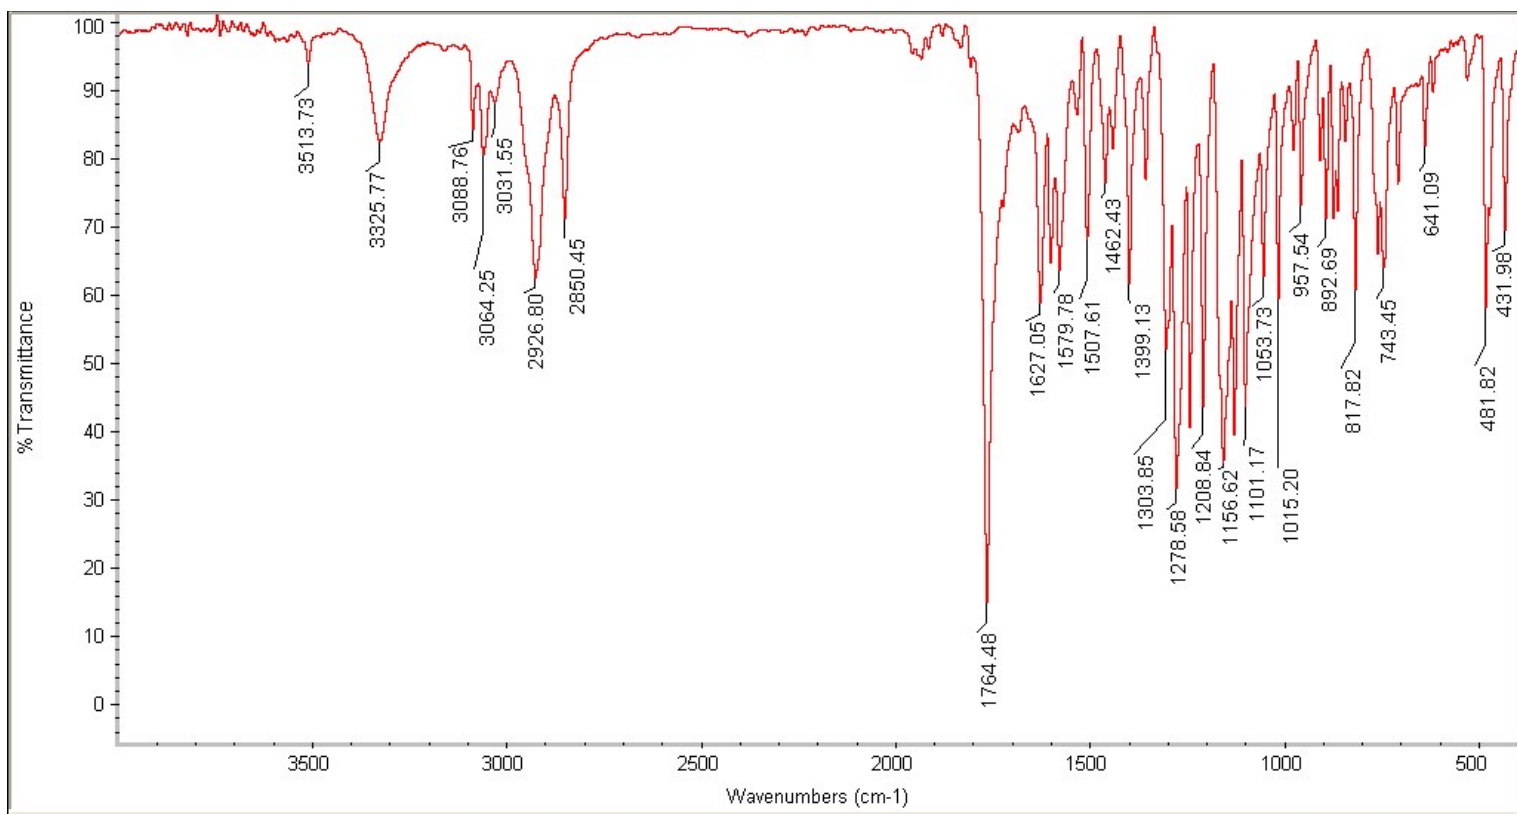

**Complex 11**

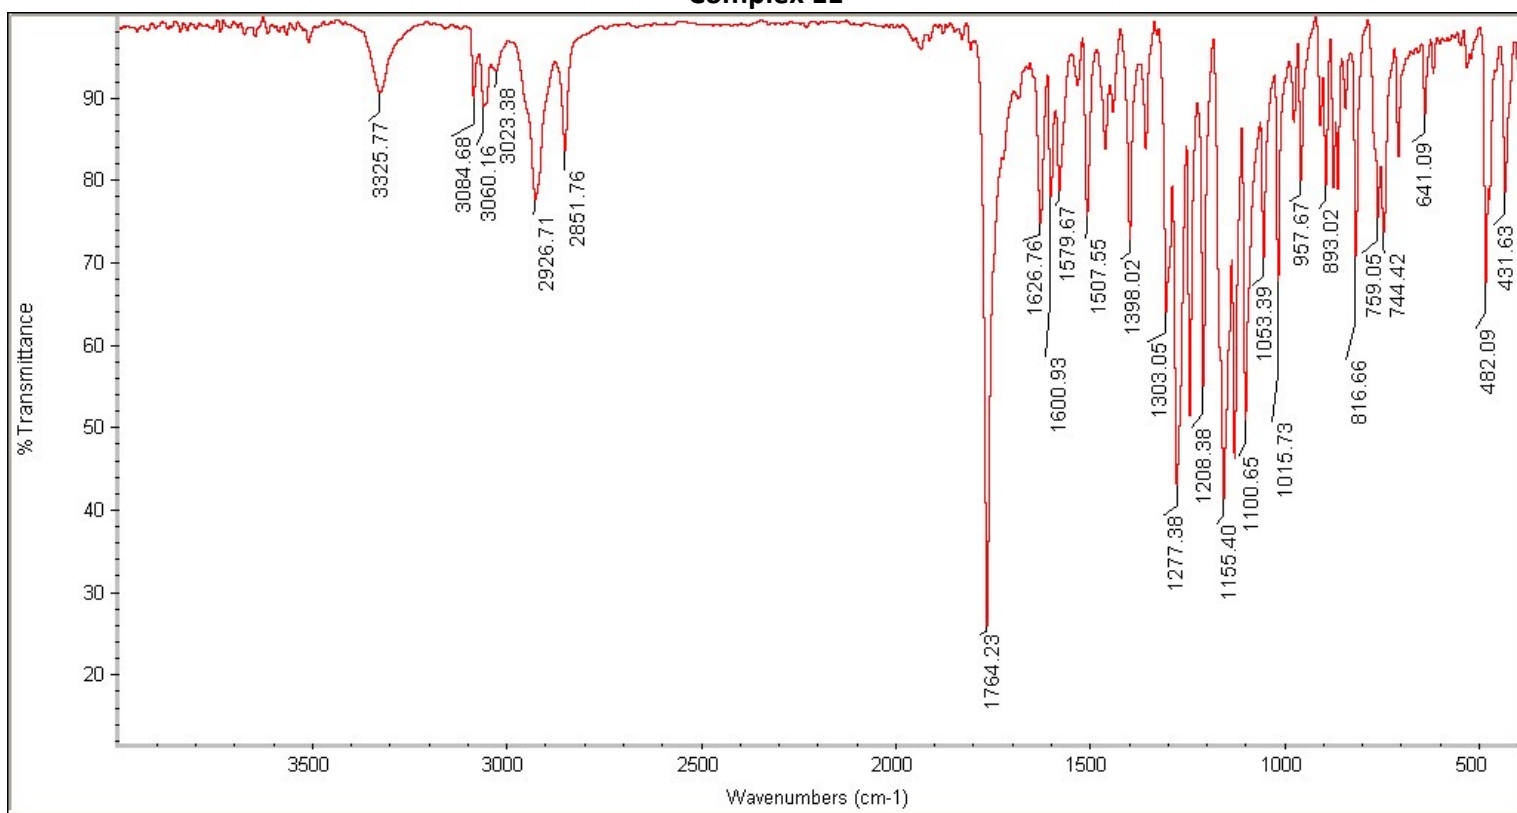

**S7. CHN-Elemental Analysis for compounds 1-11**

### Complex 1

Eager 300 Summarize Results

Date : 22/04/2017 at 11:49:07  
Method Name : NCHS  
Method Filename : Copy of Copy of N C H S-bkp .mth

| Filename            | AS Method   | Vial      |
|---------------------|-------------|-----------|
| -----               | -----       | -----     |
| samie-88            |             |           |
| # Group Sample Name | Type Weig.  | Pro.F --- |
| -----               | -----       | -----     |
| 88 1 AS8            | UNK 1.234   | 6.25 ---  |
| Component name      | Element %   |           |
| -----               | -----       | -----     |
| Nitrogen%           | 3.618430376 |           |
| Carbon%             | 49.17246628 |           |
| Hydrogen%           | 2.913830519 |           |
| Sulphur%            | 0           |           |

1 Sample(s) in Group No : 1  
Component Name Average  
-----  
Nitrogen% 3.618430376  
Carbon% 49.17246628  
Hydrogen% 2.913830519  
Sulphur% 0

### Complex 3

Eager 300 Summarize Results

Date : 22/04/2017 at 11:49:00  
Method Name : NCHS  
Method Filename : Copy of Copy of N C H S-bkp .mth

| Filename            | AS Method   | Vial      |
|---------------------|-------------|-----------|
| -----               | -----       | -----     |
| samie-87            |             |           |
| # Group Sample Name | Type Weig.  | Pro.F --- |
| -----               | -----       | -----     |
| 87 1 AS13           | UNK 1.28    | 6.25 ---  |
| Component name      | Element %   |           |
| -----               | -----       | -----     |
| Nitrogen%           | 2.952723265 |           |
| Carbon%             | 40.11894226 |           |
| Hydrogen%           | 2.276647568 |           |
| Sulphur%            | 0           |           |

1 Sample(s) in Group No : 1  
Component Name Average  
-----  
Nitrogen% 2.952723265  
Carbon% 40.11894226  
Hydrogen% 2.276647568  
Sulphur% 0

### Complex 5

Eager 300 Summarize Results

Date : 13/05/2017 at 11:34:18  
Method Name : NCHS  
Method Filename : Copy of Copy of N C H S-bkp .mth

| Filename            | AS Method   | Vial      |
|---------------------|-------------|-----------|
| -----               | -----       | -----     |
| samie-146           |             |           |
| # Group Sample Name | Type Weig.  | Pro.F --- |
| -----               | -----       | -----     |
| 146 1 AS14a         | UNK 1.214   | 6.25 ---  |
| Component name      | Element %   |           |
| -----               | -----       | -----     |
| Nitrogen%           | 2.51397562  |           |
| Carbon%             | 30.98172951 |           |
| Hydrogen%           | 1.870144248 |           |
| Sulphur%            | 0           |           |

1 Sample(s) in Group No : 1  
Component Name Average  
-----  
Nitrogen% 2.51397562  
Carbon% 30.98172951  
Hydrogen% 1.870144248  
Sulphur% 0

### Complex 7 (1:2)

### Complex 2

Eager 300 Summarize Results

Date : 22/04/2017 at 11:48:54  
Method Name : NCHS  
Method Filename : Copy of Copy of N C H S-bkp .mth

| Filename            | AS Method   | Vial      |
|---------------------|-------------|-----------|
| -----               | -----       | -----     |
| samie-86            |             |           |
| # Group Sample Name | Type Weig.  | Pro.F --- |
| -----               | -----       | -----     |
| 86 1 AS21           | UNK 1.083   | 6.25 ---  |
| Component name      | Element %   |           |
| -----               | -----       | -----     |
| Nitrogen%           | 3.188761473 |           |
| Carbon%             | 44.67723083 |           |
| Hydrogen%           | 2.594818592 |           |
| Sulphur%            | 0           |           |

1 Sample(s) in Group No : 1  
Component Name Average  
-----  
Nitrogen% 3.188761473  
Carbon% 44.67723083  
Hydrogen% 2.594818592  
Sulphur% 0

### Complex 4

Eager 300 Summarize Results

Date : 22/04/2017 at 11:48:29  
Method Name : NCHS  
Method Filename : Copy of Copy of N C H S-bkp .mth

| Filename            | AS Method   | Vial      |
|---------------------|-------------|-----------|
| -----               | -----       | -----     |
| samie-83            |             |           |
| # Group Sample Name | Type Weig.  | Pro.F --- |
| -----               | -----       | -----     |
| 83 1 AS9            | UNK 1.514   | 6.25 ---  |
| Component name      | Element %   |           |
| -----               | -----       | -----     |
| Nitrogen%           | 3.514662981 |           |
| Carbon%             | 49.15002823 |           |
| Hydrogen%           | 3.730189562 |           |
| Sulphur%            | 0           |           |

1 Sample(s) in Group No : 1  
Component Name Average  
-----  
Nitrogen% 3.514662981  
Carbon% 49.15002823  
Hydrogen% 3.730189562  
Sulphur% 0

### Complex 6

Eager 300 Summarize Results

Date : 13/05/2017 at 11:34:24  
Method Name : NCHS  
Method Filename : Copy of Copy of N C H S-bkp .mth

| Filename            | AS Method   | Vial      |
|---------------------|-------------|-----------|
| -----               | -----       | -----     |
| samie-147           |             |           |
| # Group Sample Name | Type Weig.  | Pro.F --- |
| -----               | -----       | -----     |
| 147 1 AS17          | UNK 1.55    | 6.25 ---  |
| Component name      | Element %   |           |
| -----               | -----       | -----     |
| Nitrogen%           | 3.022508144 |           |
| Carbon%             | 28.24775696 |           |
| Hydrogen%           | 1.781832695 |           |
| Sulphur%            | 0           |           |

1 Sample(s) in Group No : 1  
Component Name Average  
-----  
Nitrogen% 3.022508144  
Carbon% 28.24775696  
Hydrogen% 1.781832695  
Sulphur% 0

### Complex 7' (1:1)



## Eager 300 Summarize Results

Date : 03/05/2017 at 11:58:21  
 Method Name : NCHS  
 Method Filename : Copy of Copy of N C H S-bkp .mth

| Filename            | AS Method   | Vial      |
|---------------------|-------------|-----------|
| -----               | -----       | -----     |
| sample-119          |             |           |
| # Group Sample Name | Type Weig.  | Pro.F --- |
| -----               | -----       | -----     |
| 119 1 AS15          | UNK 1.299   | 6.25 ---  |
| Component name      | Element %   |           |
| -----               | -----       |           |
| Nitrogen%           | 7.016540051 |           |
| Carbon%             | 45.98410034 |           |
| Hydrogen%           | 2.746521711 |           |
| Sulphur%            | 0           |           |

1 Sample(s) in Group No : 1

| Component Name | Average     |
|----------------|-------------|
| -----          | -----       |
| Nitrogen%      | 7.016540051 |
| Carbon%        | 45.98410034 |
| Hydrogen%      | 2.746521711 |
| Sulphur%       | 0           |

**Complex 8 (1:2)**

## Eager 300 Summarize Results

Date : 22/04/2017 at 11:48:40  
 Method Name : NCHS  
 Method Filename : Copy of Copy of N C H S-bkp .mth

| Filename            | AS Method   | Vial      |
|---------------------|-------------|-----------|
| -----               | -----       | -----     |
| sample-84           |             |           |
| # Group Sample Name | Type Weig.  | Pro.F --- |
| -----               | -----       | -----     |
| 84 1 AS10           | UNK 1.174   | 6.25 ---  |
| Component name      | Element %   |           |
| -----               | -----       |           |
| Nitrogen%           | 5.948138237 |           |
| Carbon%             | 41.56671524 |           |
| Hydrogen%           | 2.608825207 |           |
| Sulphur%            | 0           |           |

1 Sample(s) in Group No : 1

| Component Name | Average     |
|----------------|-------------|
| -----          | -----       |
| Nitrogen%      | 5.948138237 |
| Carbon%        | 41.56671524 |
| Hydrogen%      | 2.608825207 |
| Sulphur%       | 0           |

**Complex 9 (1:2)**

## Eager 300 Summarize Results

Date : 29/04/2017 at 12:19:58  
 Method Name : NCHS  
 Method Filename : Copy of Copy of N C H S-bkp .mth

| Filename            | AS Method   | Vial      |
|---------------------|-------------|-----------|
| -----               | -----       | -----     |
| sample-105          |             |           |
| # Group Sample Name | Type Weig.  | Pro.F --- |
| -----               | -----       | -----     |
| 105 1 AS19          | UNK 1.375   | 6.25 ---  |
| Component name      | Element %   |           |
| -----               | -----       |           |
| Nitrogen%           | 5.861464977 |           |
| Carbon%             | 38.29249573 |           |
| Hydrogen%           | 2.280479431 |           |
| Sulphur%            | 0           |           |

1 Sample(s) in Group No : 1

| Component Name | Average     |
|----------------|-------------|
| -----          | -----       |
| Nitrogen%      | 5.861464977 |
| Carbon%        | 38.29249573 |
| Hydrogen%      | 2.280479431 |
| Sulphur%       | 0           |

**Complex 10**

## Eager 300 Summarize Results

Date : 29/07/2017 at 11:19:43  
 Method Name : NCHS  
 Method Filename : Copy of Copy of N C H S-bkp .mth

| Filename            | AS Method   | Vial      |
|---------------------|-------------|-----------|
| -----               | -----       | -----     |
| sample-104          |             |           |
| # Group Sample Name | Type Weig.  | Pro.F --- |
| -----               | -----       | -----     |
| 104 1 AS15a         | UNK 1.121   | 6.25 ---  |
| Component name      | Element %   |           |
| -----               | -----       |           |
| Nitrogen%           | 5.185403824 |           |
| Carbon%             | 35.33866501 |           |
| Hydrogen%           | 2.285821199 |           |
| Sulphur%            | 0           |           |

1 Sample(s) in Group No : 1

| Component Name | Average     |
|----------------|-------------|
| -----          | -----       |
| Nitrogen%      | 5.185403824 |
| Carbon%        | 35.33866501 |
| Hydrogen%      | 2.285821199 |
| Sulphur%       | 0           |

**Complex 8' (1:1)**

## Eager 300 Summarize Results

Date : 03/05/2017 at 11:58:27  
 Method Name : NCHS  
 Method Filename : Copy of Copy of N C H S-bkp .mth

| Filename            | AS Method   | Vial      |
|---------------------|-------------|-----------|
| -----               | -----       | -----     |
| Sami-120            |             |           |
| # Group Sample Name | Type Weig.  | Pro.F --- |
| -----               | -----       | -----     |
| 120 1 AS10a         | UNK 1.065   | 6.25 ---  |
| Component name      | Element %   |           |
| -----               | -----       |           |
| Nitrogen%           | 4.535764417 |           |
| Carbon%             | 29.94066550 |           |
| Hydrogen%           | 1.603418018 |           |
| Sulphur%            | 0           |           |

1 Sample(s) in Group No : 1

| Component Name | Average     |
|----------------|-------------|
| -----          | -----       |
| Nitrogen%      | 4.535764417 |
| Carbon%        | 29.94066550 |
| Hydrogen%      | 1.603418018 |
| Sulphur%       | 0           |

**Complex 9' (1:1)**

## Eager 300 Summarize Results

Date : 13/05/2017 at 11:34:12  
 Method Name : NCHS  
 Method Filename : Copy of Copy of N C H S-bkp .mth

| Filename            | AS Method   | Vial      |
|---------------------|-------------|-----------|
| -----               | -----       | -----     |
| Sami-145            |             |           |
| # Group Sample Name | Type Weig.  | Pro.F --- |
| -----               | -----       | -----     |
| 145 1 AS19a         | UNK 2.075   | 6.25 ---  |
| Component name      | Element %   |           |
| -----               | -----       |           |
| Nitrogen%           | 3.862572517 |           |
| Carbon%             | 25.21708679 |           |
| Hydrogen%           | 1.330710745 |           |
| Sulphur%            | 0           |           |

1 Sample(s) in Group No : 1

| Component Name | Average     |
|----------------|-------------|
| -----          | -----       |
| Nitrogen%      | 3.862572517 |
| Carbon%        | 25.21708679 |
| Hydrogen%      | 1.330710745 |
| Sulphur%       | 0           |

**Complex 11**

Eager 300 Summarize Results

Date : 22/04/2017 at 11:48:21  
 Method Name : NCHS  
 Method Filename : Copy of Copy of N C H S-bkp .mth

| Filename       | AS Method | Vial        |      |       |       |
|----------------|-----------|-------------|------|-------|-------|
| -----          | -----     | -----       |      |       |       |
| sample-82      |           |             |      |       |       |
| #              | Group     | Sample Name | Type | Weig. | Pro.F |
| 82             | 1         | As11        | UNK  | 1.267 | 6.25  |
| Component name | Element   | %           |      |       |       |
| Nitrogen%      |           | 7.162701607 |      |       |       |
| Carbon%        |           | 47.0364418  |      |       |       |
| Hydrogen%      |           | 3.08091712  |      |       |       |
| Sulphur%       |           | 0           |      |       |       |

1 Sample(s) in Group No : 1

| Component Name | Average     |
|----------------|-------------|
| Nitrogen%      | 7.162701607 |
| Carbon%        | 47.0364418  |
| Hydrogen%      | 3.08091712  |
| Sulphur%       | 0           |

Eager 300 Summarize Results

Date : 22/04/2017 at 11:48:47  
 Method Name : NCHS  
 Method Filename : Copy of Copy of N C H S-bkp .mth

| Filename       | AS Method | Vial        |      |       |       |
|----------------|-----------|-------------|------|-------|-------|
| -----          | -----     | -----       |      |       |       |
| sample-85      |           |             |      |       |       |
| #              | Group     | Sample Name | Type | Weig. | Pro.F |
| 85             | 1         | AS20        | UNK  | 0.968 | 6.25  |
| Component name | Element   | %           |      |       |       |
| Nitrogen%      |           | 6.381759167 |      |       |       |
| Carbon%        |           | 42.50958633 |      |       |       |
| Hydrogen%      |           | 2.7260077   |      |       |       |
| Sulphur%       |           | 0           |      |       |       |

1 Sample(s) in Group No : 1

| Component Name | Average     |
|----------------|-------------|
| Nitrogen%      | 6.381759167 |
| Carbon%        | 42.50958633 |
| Hydrogen%      | 2.7260077   |
| Sulphur%       | 0           |

S8. <sup>13</sup>C-NMR spectrums for compounds 1-11

Complex 1

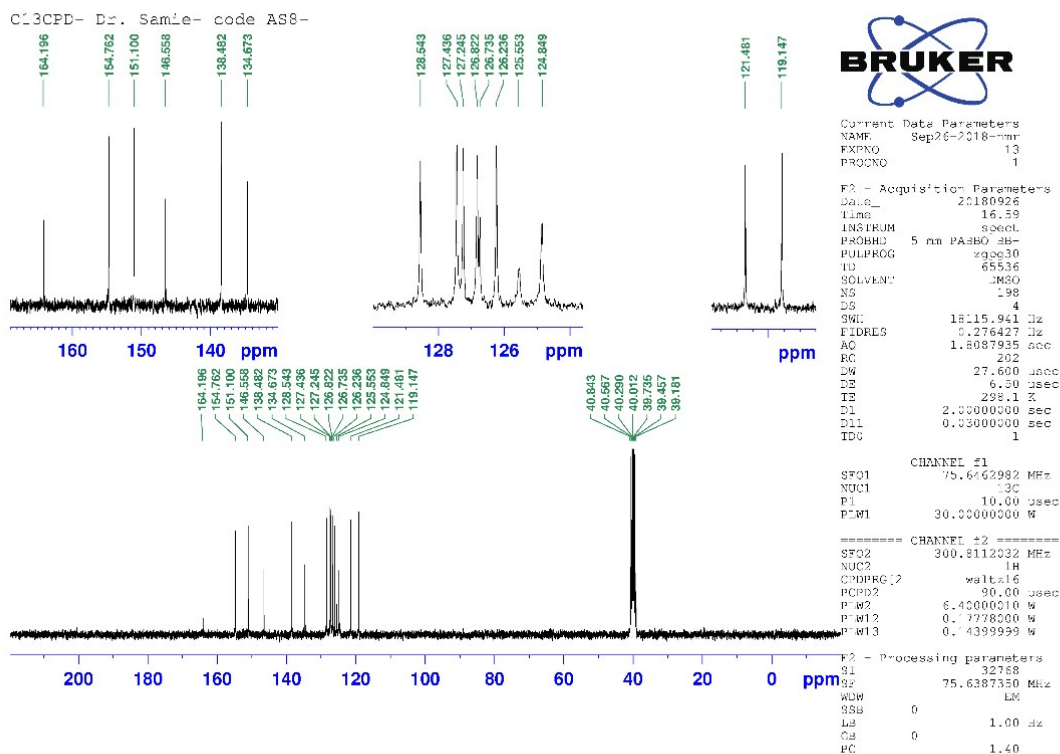

Complex 2

C13CPD- Dr. Samie- code AS21-

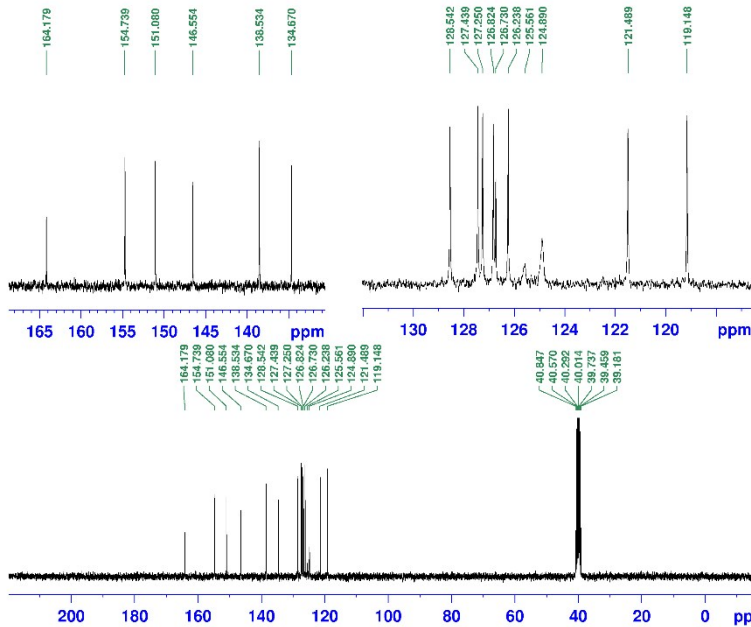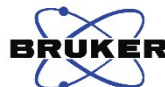

Current Data Parameters  
 NAME Sep26 2018 nar  
 EXPNO 18  
 PROCNO 1

F2 - Acquisition Parameters  
 Date\_ 20-09-26  
 Time 17.50  
 INSTRUM spect  
 PROBD 5 mm PABO BB-  
 PULPROG zgpg30  
 TD 65536  
 SOLVENT: H<sub>2</sub>O  
 NS 128  
 DS 4  
 SWH 1815.941 Hz  
 FIDRES 0.26427 Hz  
 AQ 1.8087935 sec  
 RG 202  
 DR 27.600 usec  
 DE 4.50 usec  
 TE 298.1 K  
 D1 2.0000000 sec  
 D11 0.0300000 sec  
 D10 1

==== CHANNEL f1 =====  
 SFO1 75.6462982 MHz  
 NUC1 13C  
 P1 10.00 usec  
 PLW1 30.0000000 W

==== CHANNEL f2 =====  
 SFO2 300.8112032 MHz  
 NUC2 1H  
 CPDPRG2 waltz16  
 PCD2 90.00 usec  
 PLW2 6.40000010 W  
 PLW12 0.17778000 W  
 PLW13 0.14399999 W

F2 - Processing parameters  
 SI 32768  
 SF 75.6387350 MHz  
 WDW EM  
 SSB 0  
 GB 1.00 Hz  
 PC 1.40

Complex 3

C13CPD- Dr. Samie- code AS13-

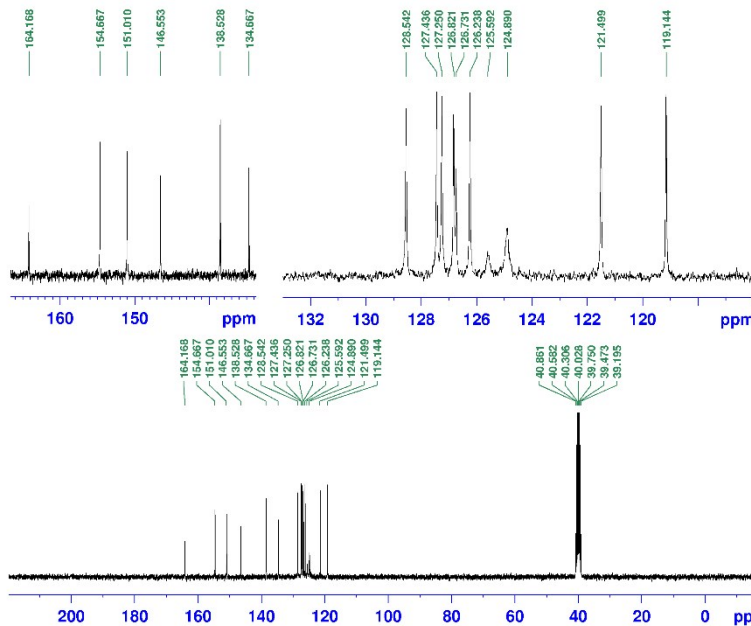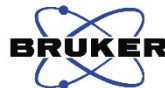

Current Data Parameters  
 NAME Sep26 2018 nar  
 EXPNO 16  
 PROCNO 1

F2 - Acquisition Parameters  
 Date\_ 20-09-26  
 Time 17.33  
 INSTRUM spect  
 PROBD 5 mm PABO BB-  
 PULPROG zgpg30  
 TD 65536  
 SOLVENT: H<sub>2</sub>O  
 NS 256  
 DS 4  
 SWH 1815.941 Hz  
 FIDRES 0.26427 Hz  
 AQ 1.8087935 sec  
 RG 202  
 DR 27.600 usec  
 DE 4.50 usec  
 TE 298.1 K  
 D1 2.0000000 sec  
 D11 0.0300000 sec  
 D10 1

==== CHANNEL f1 =====  
 SFO1 75.6462982 MHz  
 NUC1 13C  
 P1 10.00 usec  
 PLW1 30.0000000 W

==== CHANNEL f2 =====  
 SFO2 300.8112032 MHz  
 NUC2 1H  
 CPDPRG2 waltz16  
 PCD2 90.00 usec  
 PLW2 6.40000010 W  
 PLW12 0.17778000 W  
 PLW13 0.14399999 W

F2 - Processing parameters  
 SI 32768  
 SF 75.6387350 MHz  
 WDW EM  
 SSB 0  
 GB 1.00 Hz  
 PC 1.40

Complex 4

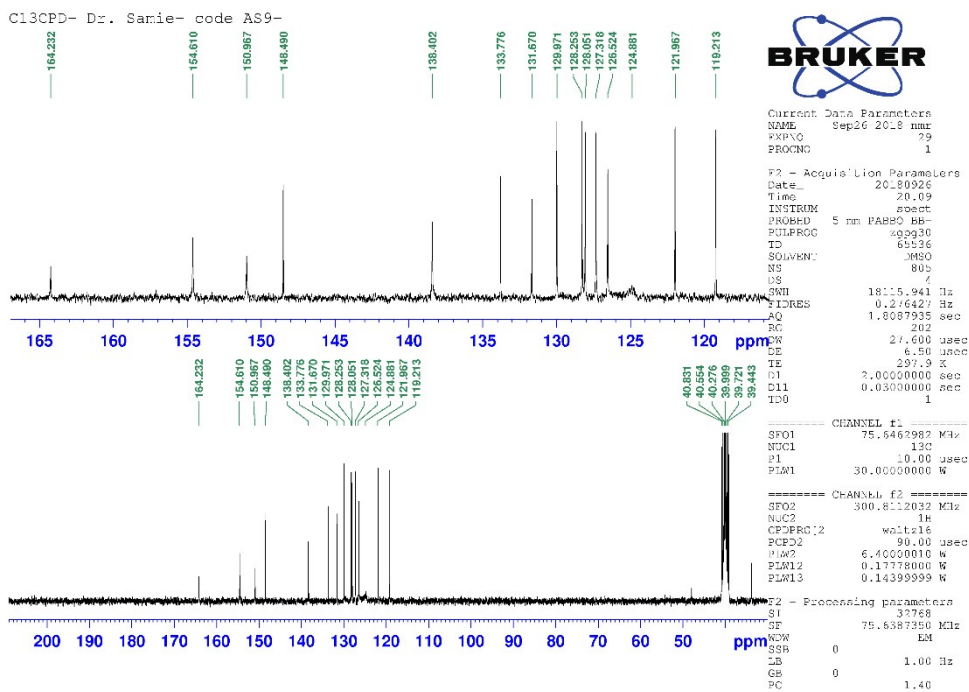

Complex 5

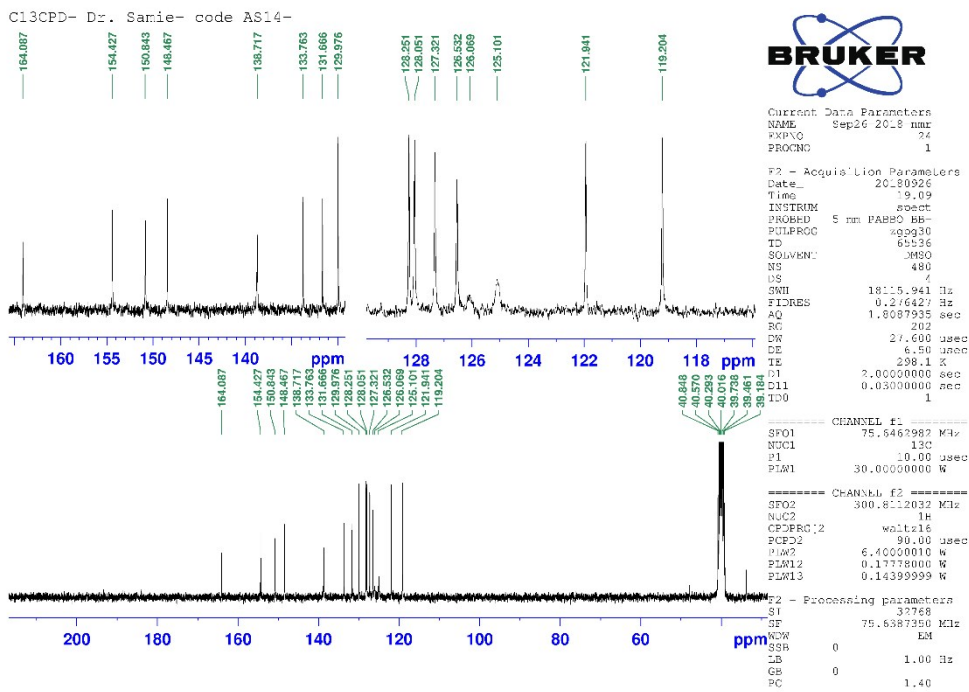

Complex 6



C13CPD- Dr. Samie- code AS17-

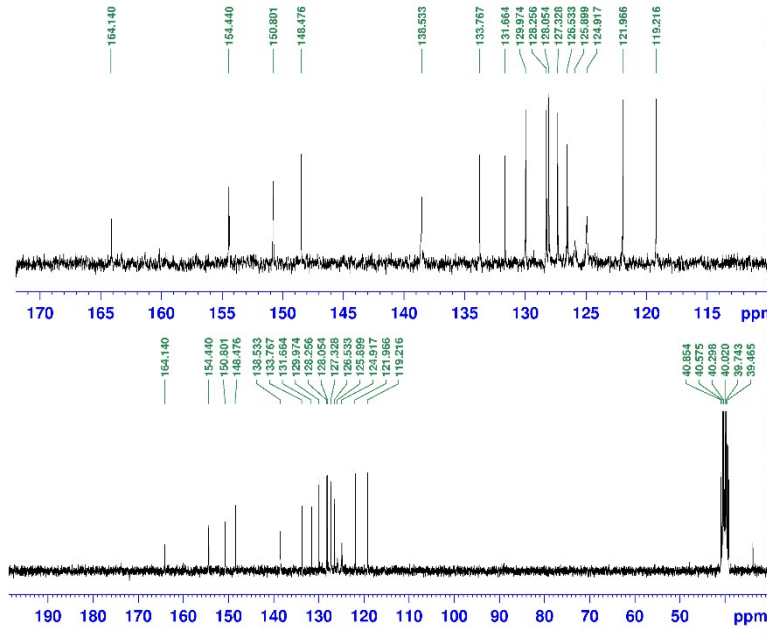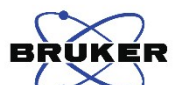

Current Data Parameters  
 NAME Sep26 2018 nar  
 EXPNO 27  
 PROCNO 1

F2 - Acquisition Parameters  
 Date\_ 20180926  
 Time 19.49  
 INSTRUM spect  
 PROBD 5 mm PABO BB-  
 PULPROG zgpg30  
 TD 65536  
 SOLVENT: H<sub>2</sub>O  
 NS 274  
 DS 4  
 SWH 1815.941 Hz  
 FIDRES 0.26427 Hz  
 AQ 1.8087935 sec  
 RG 202  
 DR 27.60 usec  
 DE 6.50 usec  
 TE 297.2 K  
 D1 2.0000000 sec  
 D11 0.0300000 sec  
 TD0 1

==== CHANNEL f1 =====  
 SFO1 75.6462982 MHz  
 NUC1 13C  
 P1 10.00 usec  
 PLW1 30.0000000 W

==== CHANNEL f2 =====  
 SFO2 300.812032 MHz  
 NUC2 1H  
 CPDPRG2 waltz16  
 PCPD2 90.00 usec  
 PLW2 6.40000010 W  
 PLW12 0.17778000 W  
 PLW13 0.14399999 W

F2 - Processing parameters  
 SI 37768  
 SF 75.6387350 MHz  
 WDW EM  
 SSB 0  
 LB 1.00 Hz  
 GB 0  
 PC 1.40

Complex 7

C13CPD- Dr. Samie- code AS15-

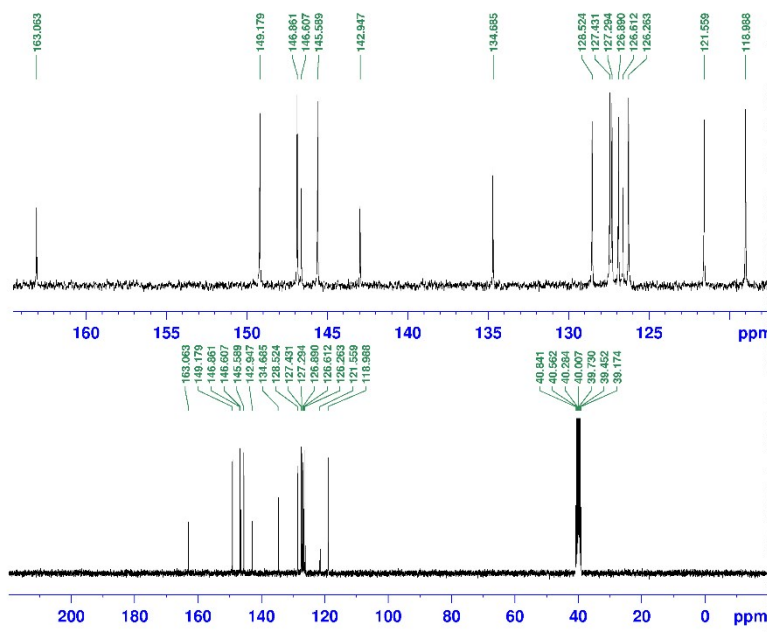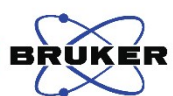

Current Data Parameters  
 NAME Sep26 2018 nar  
 EXPNO 9  
 PROCNO 1

F2 - Acquisition Parameters  
 Date\_ 20180926  
 Time 6.00  
 INSTRUM spect  
 PROBD 5 mm PABO BB-  
 PULPROG zgpg30  
 TD 65536  
 SOLVENT: H<sub>2</sub>O  
 NS 324  
 DS 4  
 SWH 1815.941 Hz  
 FIDRES 0.26427 Hz  
 AQ 1.8087935 sec  
 RG 202  
 DR 27.60 usec  
 DE 6.50 usec  
 TE 298.2 K  
 D1 2.0000000 sec  
 D11 0.0300000 sec  
 TD0 1

==== CHANNEL f1 =====  
 SFO1 75.6462982 MHz  
 NUC1 13C  
 P1 10.00 usec  
 PLW1 30.0000000 W

==== CHANNEL f2 =====  
 SFO2 300.812032 MHz  
 NUC2 1H  
 CPDPRG2 waltz16  
 PCPD2 90.00 usec  
 PLW2 6.40000010 W  
 PLW12 0.17778000 W  
 PLW13 0.14399999 W

F2 - Processing parameters  
 SI 37768  
 SF 75.6387350 MHz  
 WDW EM  
 SSB 0  
 LB 1.00 Hz  
 GB 0  
 PC 1.40

Complex 8

C13CPD- Dr. Samie- code AS10-

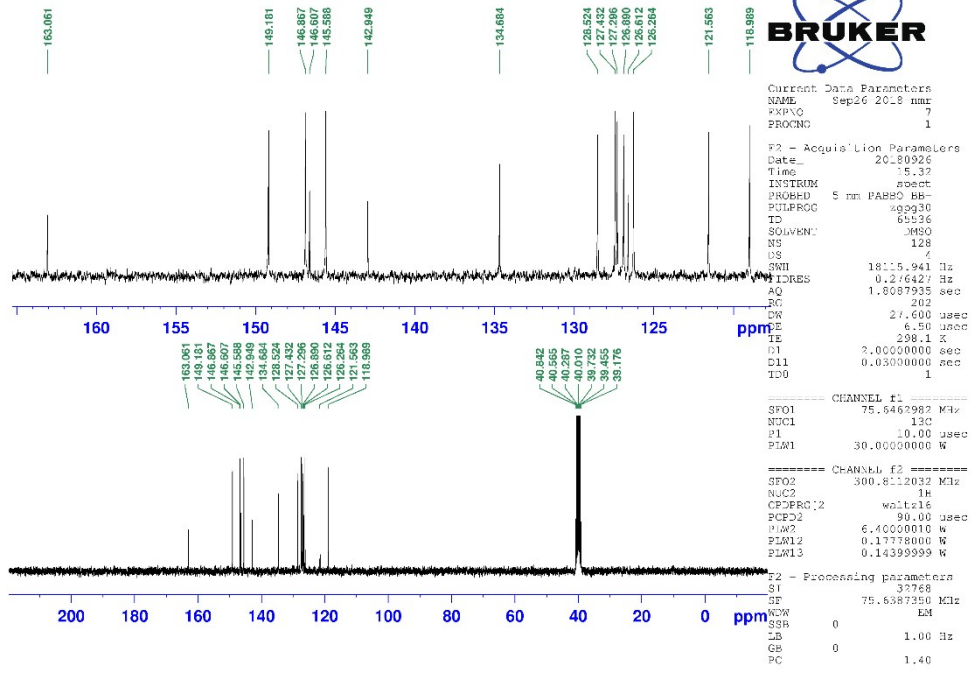

Complex 9

C13CPD- Dr. Samie- code AS19-

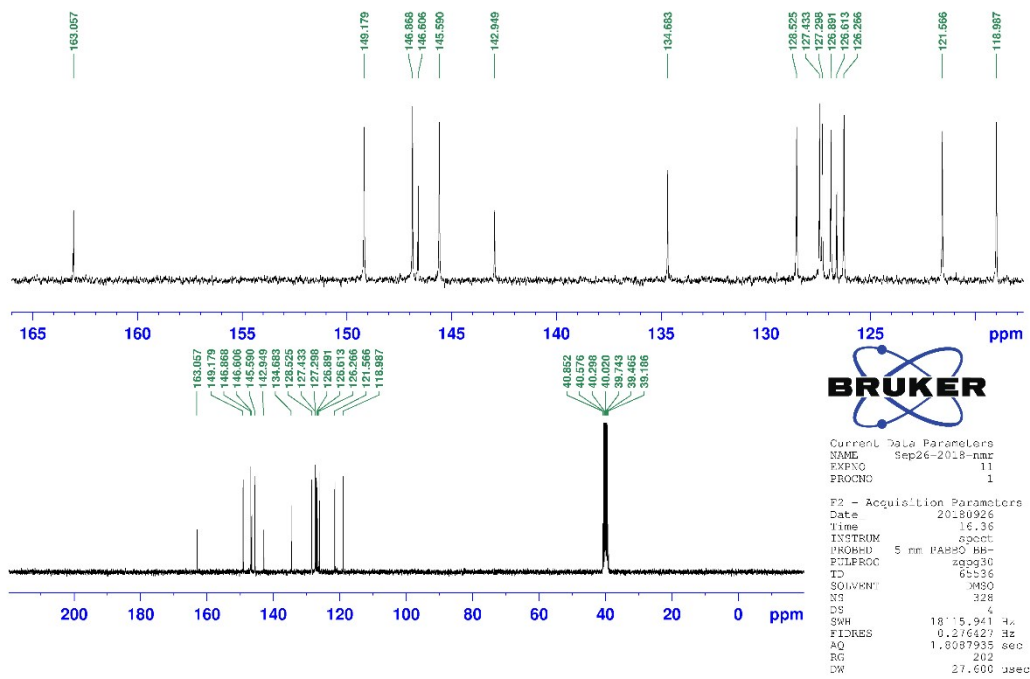

Complex 10

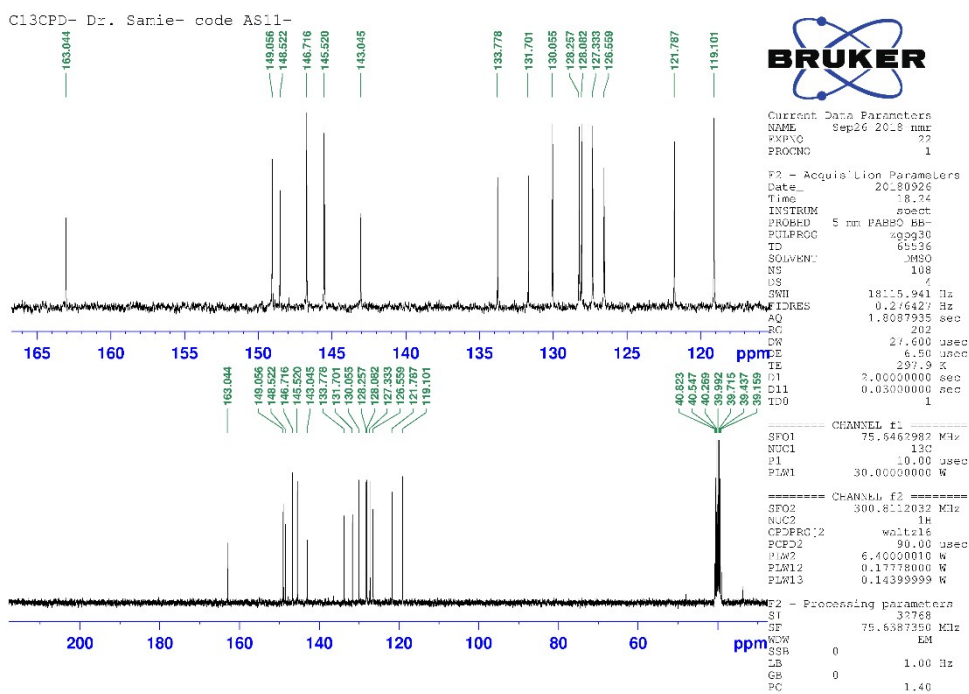

Complex 11

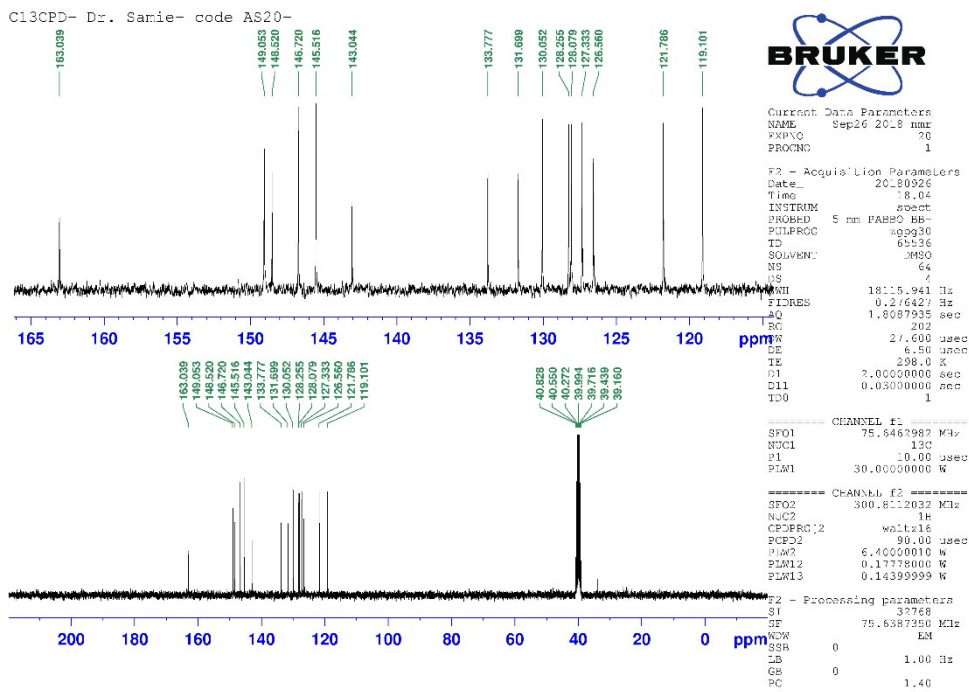

S9. <sup>1</sup>H-NMR spectrums for compounds 1-11

# Complex 1

Dr. Samie- code AS8-

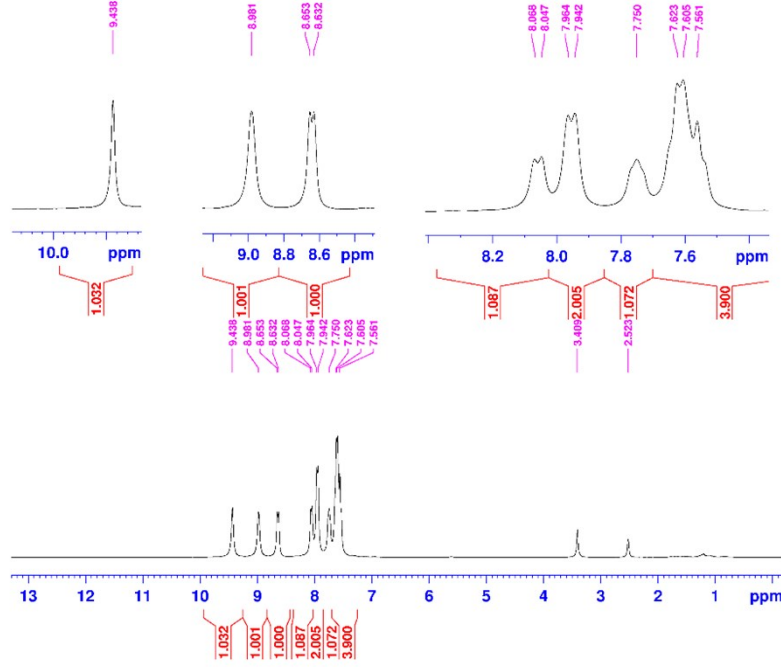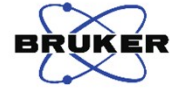

Current Data Parameters  
 NAME Sep26-2018-nmr  
 EXPNO 12  
 PROCNO 1

F2 - Acquisition Parameters  
 Date\_ 20180926  
 Time 16.43  
 INSTRUM spect  
 PROBHD 5 mm PABBO B3-  
 PULPROG zg30  
 TD 65536  
 SOLVENT DMSO  
 NS 16  
 DS 2  
 SWH 6009.612 Hz  
 FIDRES 0.091699 Hz  
 AQ 5.4525952 sec  
 RG 99.22  
 DW 83.200 usec  
 DE 6.50 usec  
 TE 297.6 K  
 D1 1.00000000 sec  
 TDO 1

==== CHANNEL f1 =====  
 SFO1 300.8118576 MHz  
 NUC1 1H  
 P1 15.00 usec  
 PLW1 6.40000010 W

F2 - Processing parameters  
 SI 65536  
 SF 300.8100000 MHz  
 WDW EM  
 SSB 0  
 LB 0.30 Hz  
 GB 0  
 PC 1.00

# Complex 1

Dr. Samie- code AS8-

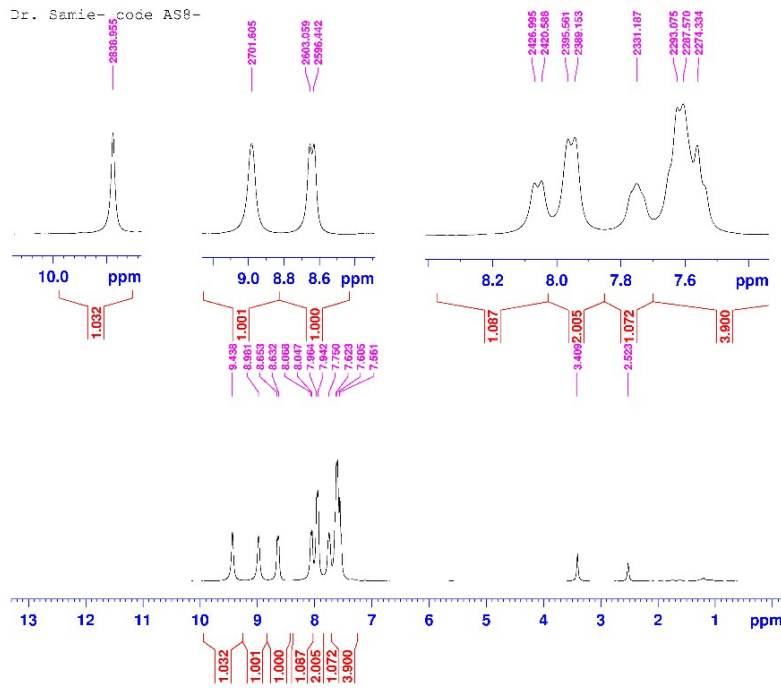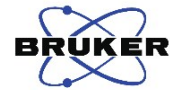

Current Data Parameters  
 NAME Sep26-2018-nmr  
 EXPNO 12  
 PROCNO 1

F2 - Acquisition Parameters  
 Date\_ 20180926  
 Time 16.43  
 INSTRUM spect  
 PROBHD 5 mm PABBO B3-  
 PULPROG zg30  
 TD 65536  
 SOLVENT DMSO  
 NS 16  
 DS 2  
 SWH 6009.612 Hz  
 FIDRES 0.091699 Hz  
 AQ 5.4525952 sec  
 RG 99.22  
 DW 83.200 usec  
 DE 6.50 usec  
 TE 297.6 K  
 D1 1.00000000 sec  
 TDO 1

==== CHANNEL f1 =====  
 SFO1 300.8118576 MHz  
 NUC1 1H  
 P1 15.00 usec  
 PLW1 6.40000010 W

F2 - Processing parameters  
 SI 65536  
 SF 300.8100000 MHz  
 WDW EM  
 SSB 0  
 LB 0.30 Hz  
 GB 0  
 PC 1.00

# Complex 2

Dr. Samia- code AS21-

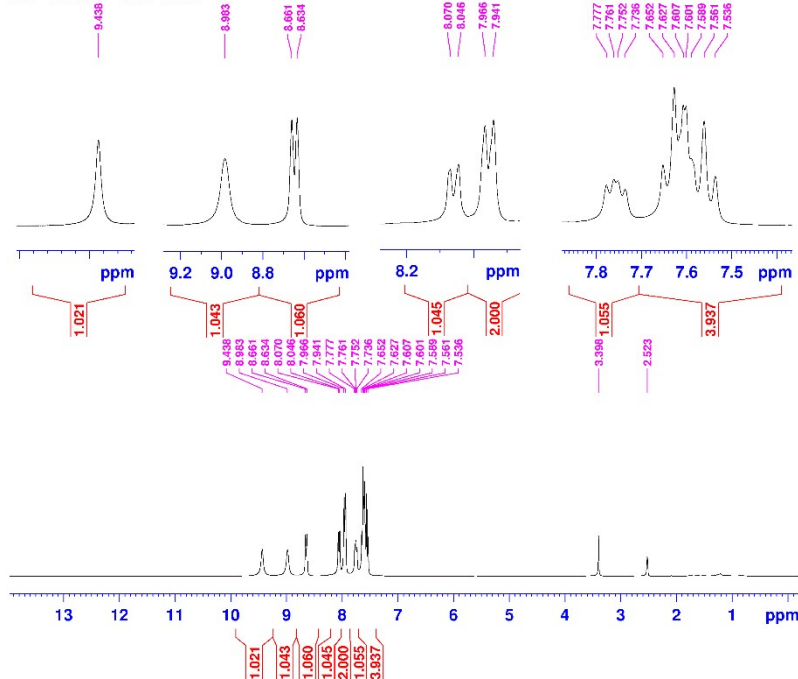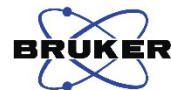

Current Data Parameters  
 NAME: Sep26-2018-nmr  
 EXPNO: 17  
 PROCNO: 1

F2 - Acquisition Parameters  
 Date: 20180926  
 Time: 17.41  
 INSTRUM: spect  
 PROBHD: 5 mm PABBO B3-  
 PULPROG: zg30  
 TD: 65536  
 SOLVENT: DMSO  
 NS: 16  
 DS: 2  
 SWH: 6009.613 Kz  
 FIDRES: 0.391699 Hz  
 AQ: 5.452992 sec  
 RG: 99.22  
 DW: 83.200 Usec  
 DE: 6.50 Usec  
 TE: 293.4 K  
 D1: 1.0000000 sec  
 TDO: 1

CHANNEL f1  
 SF01: 300.8118516 MHz  
 NUC1: 1F  
 P1: 15.00 Usec  
 PLW1: 6.40000310 W

F2 - Processing parameters  
 SI: 65436  
 SF: 300.8100000 MHz  
 WDW: RM  
 SSB: 0  
 LB: 0.30 Hz  
 GB: 0  
 PC: 1.00

### Complex 2

Dr. Samia- code AS21-

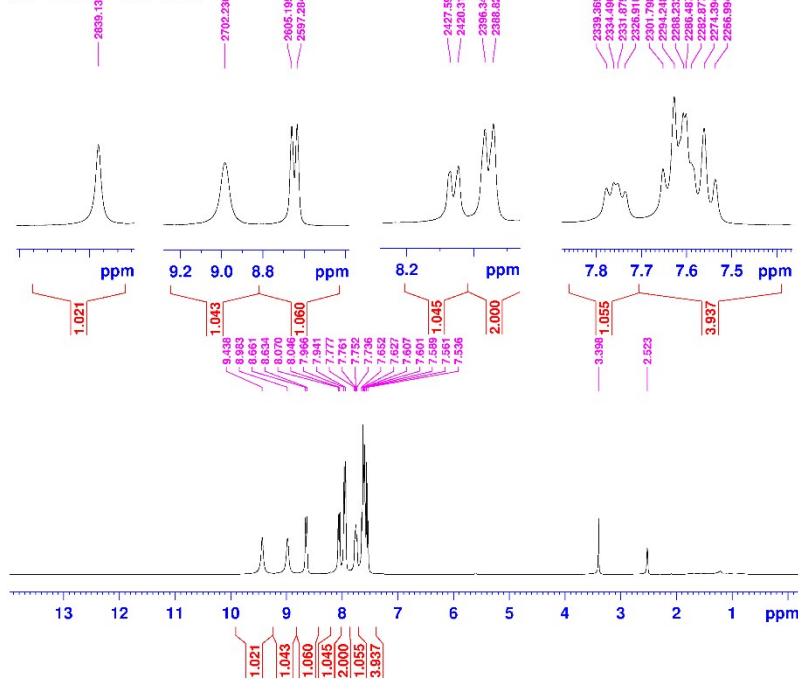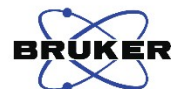

Current Data Parameters  
 NAME: Sep26-2018-nmr  
 EXPNO: 17  
 PROCNO: 1

F2 - Acquisition Parameters  
 Date: 20180926  
 Time: 17.41  
 INSTRUM: spect  
 PROBHD: 5 mm PABBO B3-  
 PULPROG: zg30  
 TD: 65536  
 SOLVENT: DMSO  
 NS: 16  
 DS: 2  
 SWH: 6009.613 Kz  
 FIDRES: 0.391699 Hz  
 AQ: 5.452992 sec  
 RG: 99.22  
 DW: 83.200 Usec  
 DE: 6.50 Usec  
 TE: 293.4 K  
 D1: 1.0000000 sec  
 TDO: 1

CHANNEL f1  
 SF01: 300.8118516 MHz  
 NUC1: 1F  
 P1: 15.00 Usec  
 PLW1: 6.40000310 W

F2 - Processing parameters  
 SI: 65436  
 SF: 300.8100000 MHz  
 WDW: RM  
 SSB: 0  
 LB: 0.30 Hz  
 GB: 0  
 PC: 1.00

### Complex 3

Dr. Samie- code AS13-

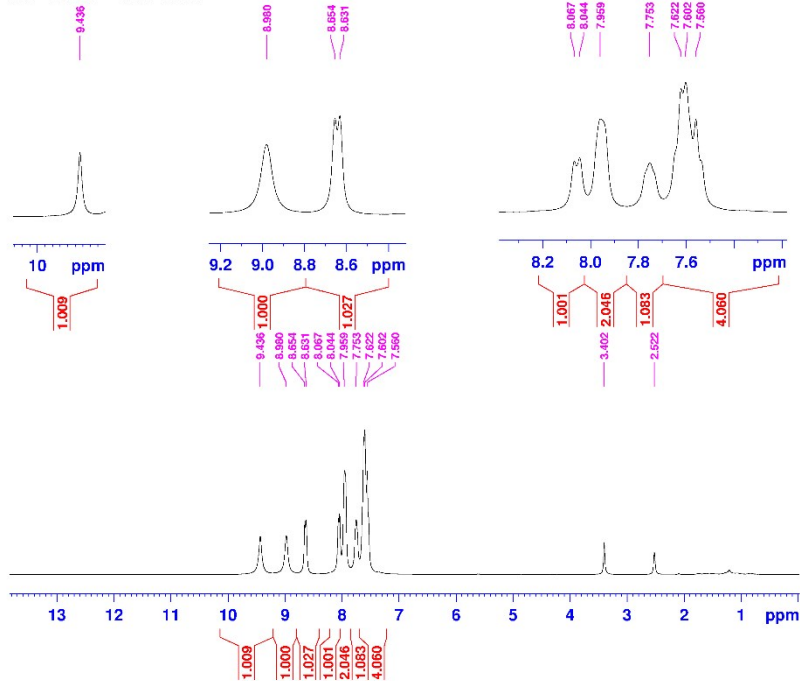

Current Data Parameters  
 NAME: Sep26-2018-nmr  
 EXPNO: 14  
 PROCNO: 1

F2 - Acquisition Parameters  
 Date\_: 20180926  
 Time: 17.06  
 INSTRUM: spect  
 PROBHD: 5 mm PABBO B3-  
 PULPROG: zg30  
 TD: 65536  
 SOLVENT: DMSO  
 NS: 16  
 DS: 2  
 SWH: 6009.613 Hz  
 FIDRES: 0.091699 Hz  
 AQ: 5.4523952 sec  
 RG: 99.22  
 DW: 83.200 usec  
 DE: 6.50 usec  
 TE: 297.2 K  
 D1: 1.00000000 sec  
 TDO: 1

==== CHANNEL f1 =====  
 SF01: 300.811876 MHz  
 NUCL1: 1H  
 P1: 15.00 usec  
 PLW1: 6.40000010 W

F2 - Processing parameters  
 SI: 65536  
 SF: 300.810000 MHz  
 WDW: RM  
 SSB: 0  
 LB: 0.30 Hz  
 GB: 0  
 PC: 1.00

### Complex 3

Dr. Samie- code AS13-

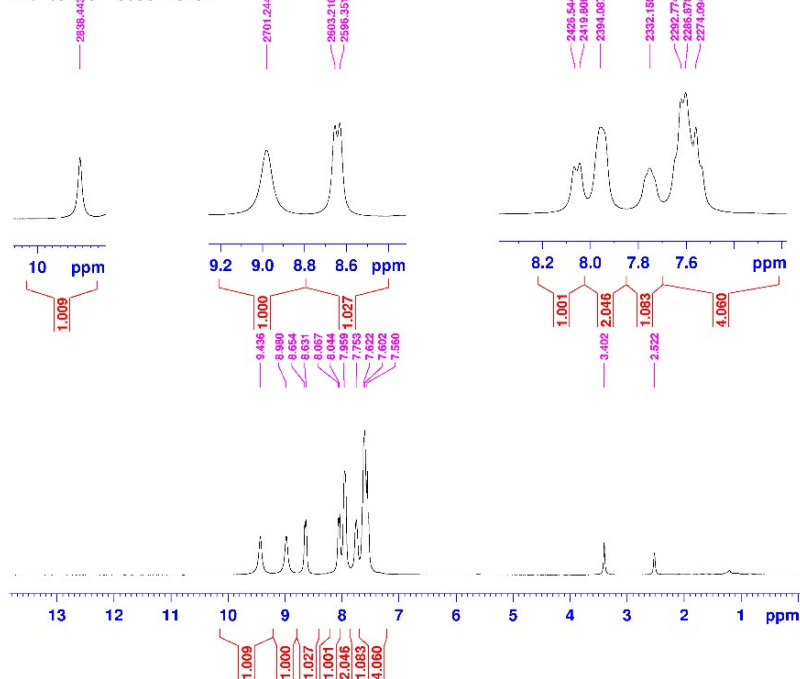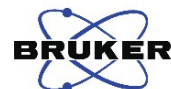

Current Data Parameters  
 NAME: Sep26-2018-nmr  
 EXPNO: 14  
 PROCNO: 1

F2 - Acquisition Parameters  
 Date\_: 20180926  
 Time: 17.06  
 INSTRUM: spect  
 PROBHD: 5 mm PABBO B3-  
 PULPROG: zg30  
 TD: 65536  
 SOLVENT: DMSO  
 NS: 16  
 DS: 2  
 SWH: 6009.615 Hz  
 FIDRES: 0.091599 Hz  
 AQ: 5.4523952 sec  
 RG: 99.22  
 DW: 83.200 usec  
 DE: 6.50 usec  
 TE: 297.2 K  
 D1: 1.00000000 sec  
 TDO: 1

==== CHANNEL f1 =====  
 SF01: 300.811876 MHz  
 NUCL1: 1H  
 P1: 15.00 usec  
 PLW1: 6.40000010 W

F2 - Processing parameters  
 SI: 65536  
 SF: 300.810000 MHz  
 WDW: RM  
 SSB: 0  
 LB: 0.30 Hz  
 GB: 0  
 PC: 1.00

### Complex 4



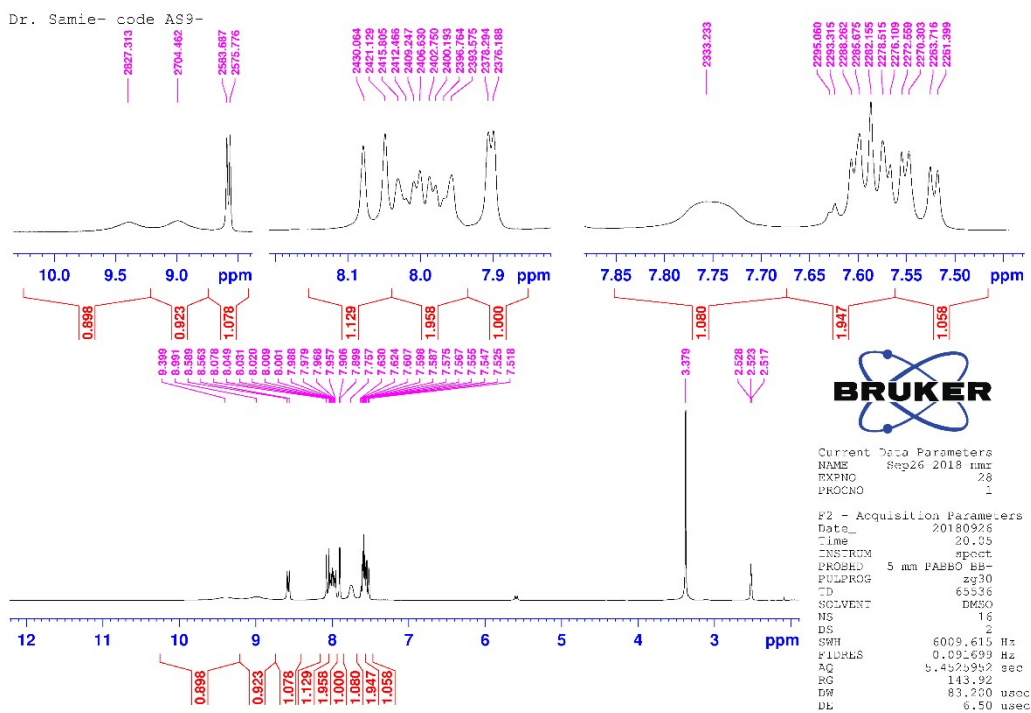

Complex 5

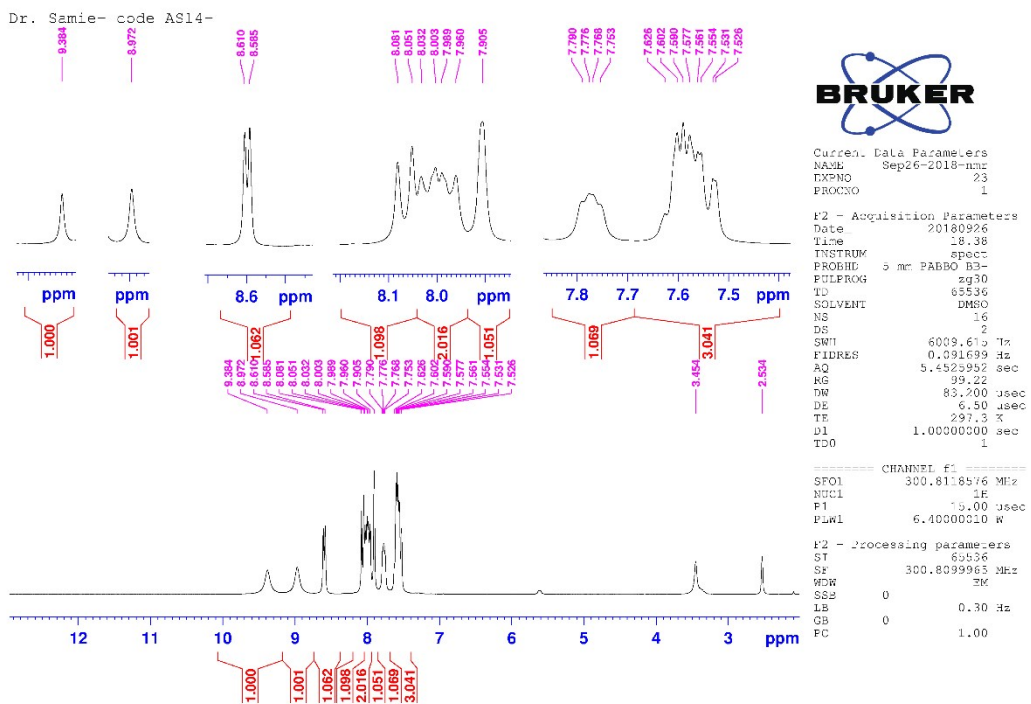

Complex 6

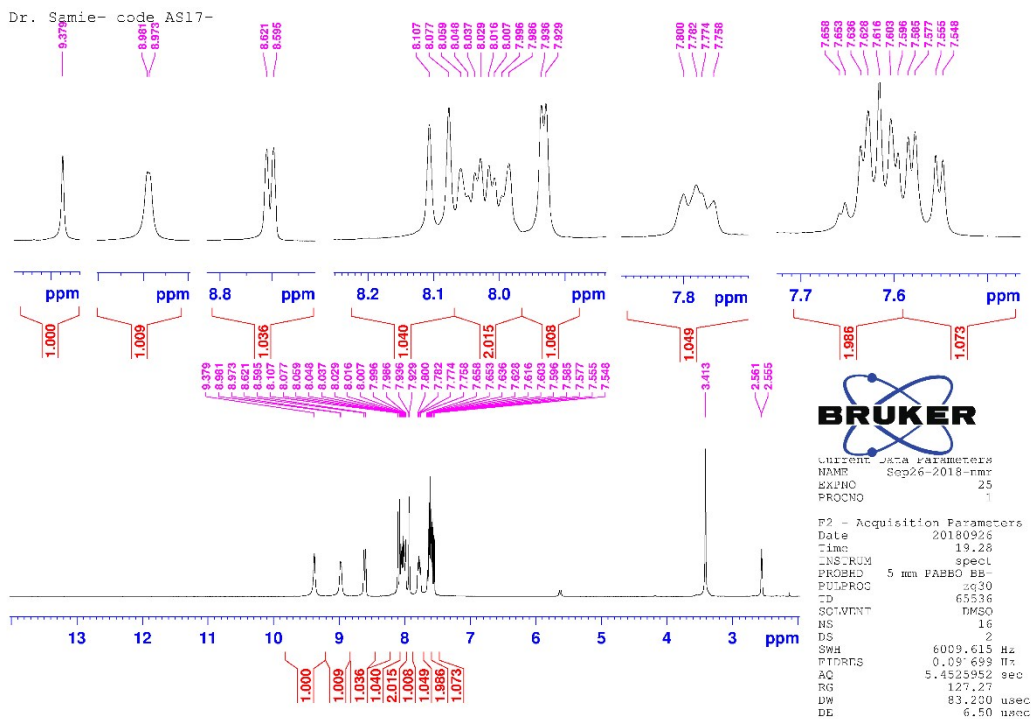

Complex 7

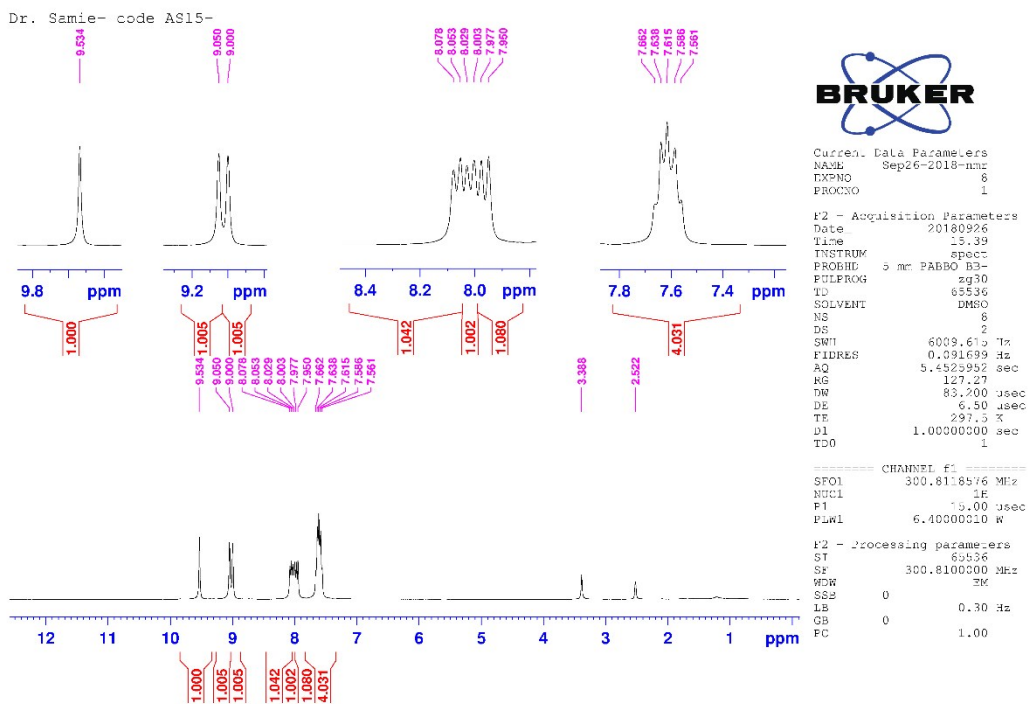

Complex 8



Dr. Samie- code AS10-

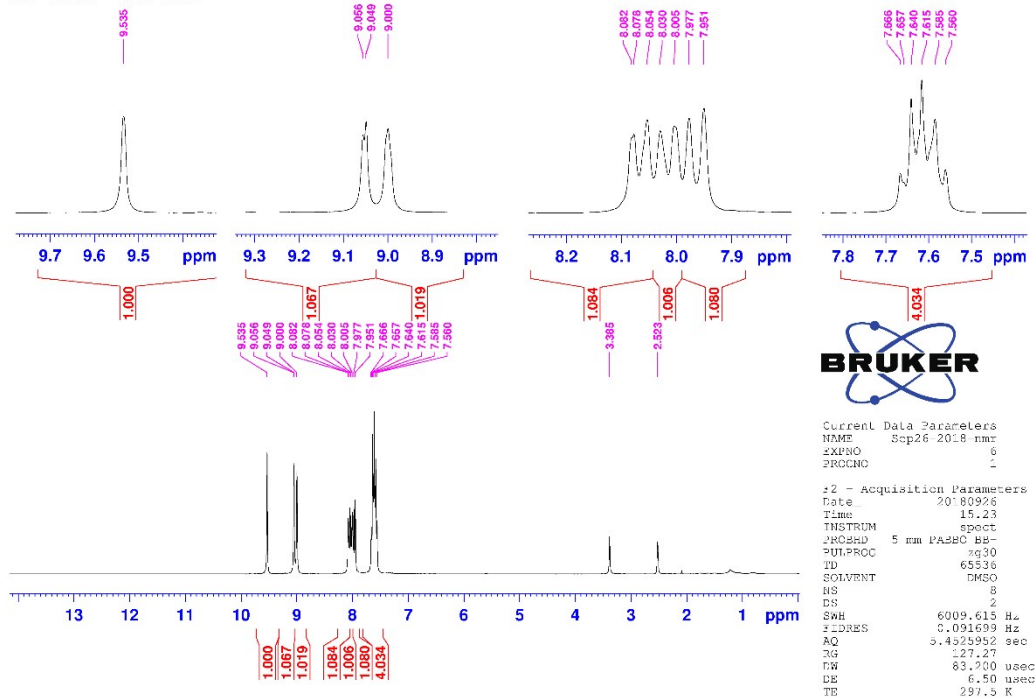

### Complex 9

Dr. Samie- code AS19-

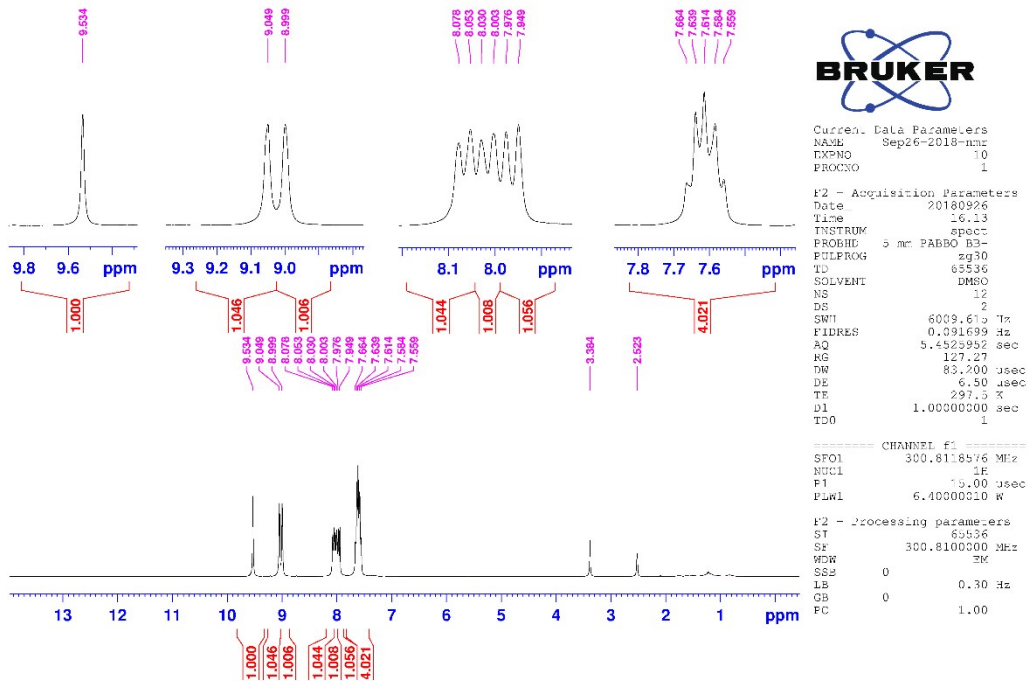

### Complex 10

Dr. Samie- code AS11-

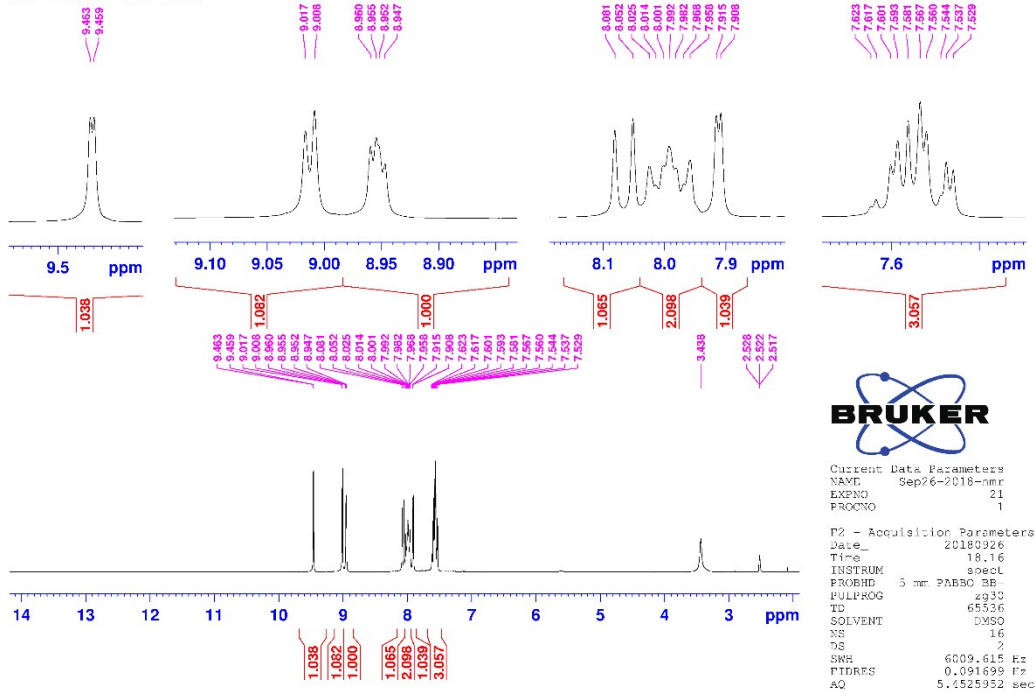

### Complex 11

Dr. Samie- code AS20-

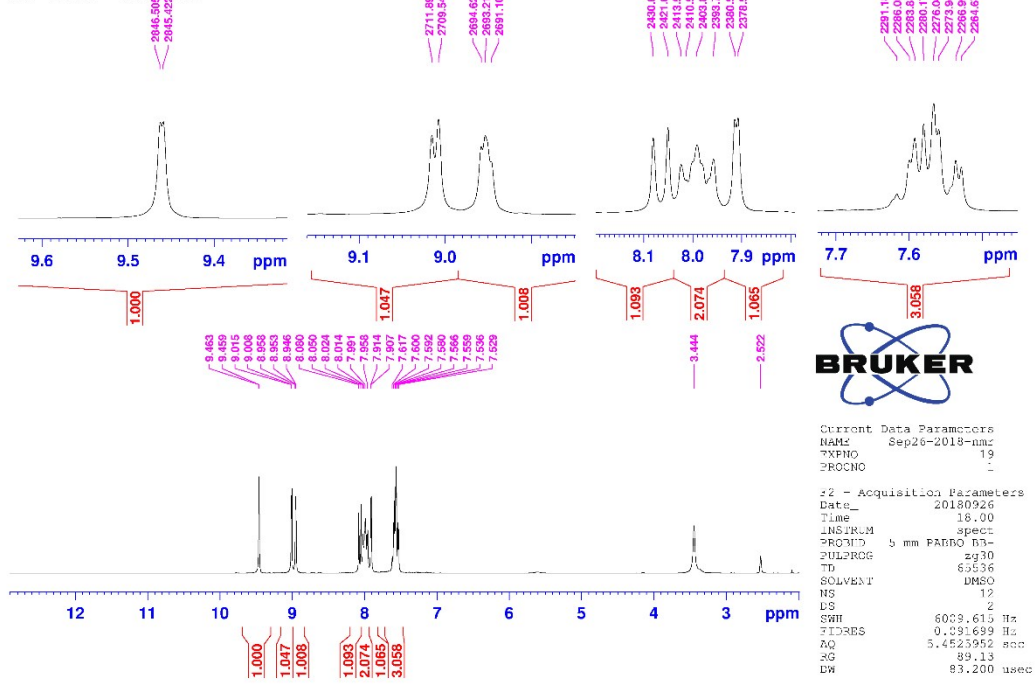

### S10. TGA and DSC diagrams for compounds 1-11

**Complex 1**

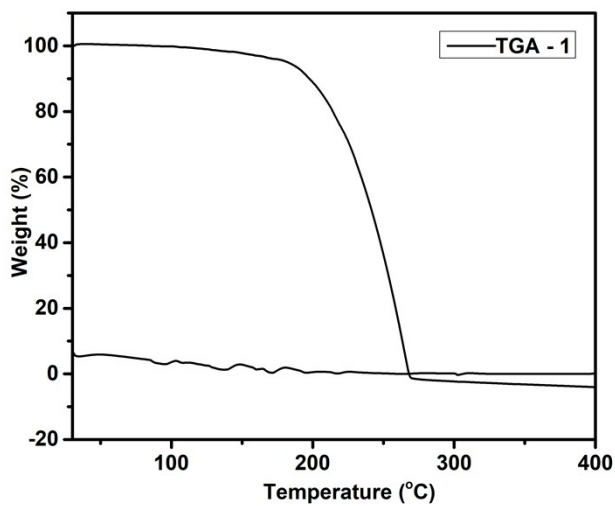

**Complex 1**

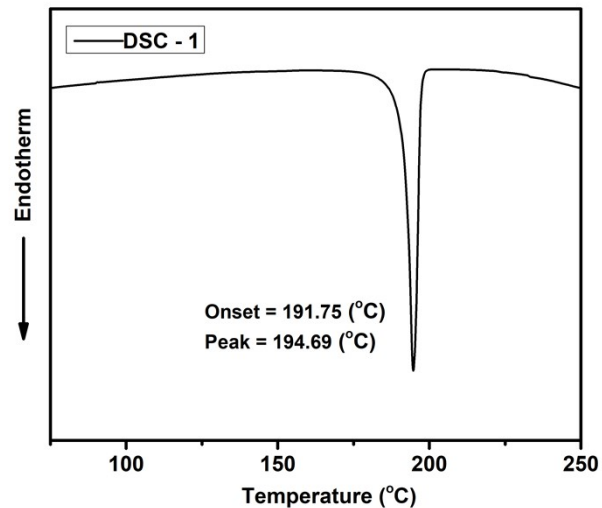

**Complex 2**

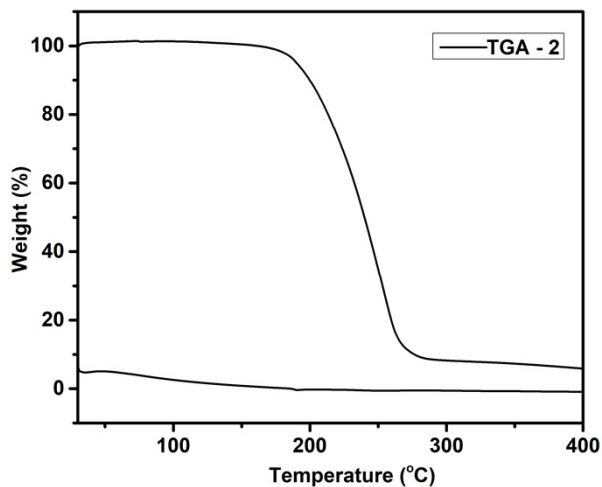

**Complex 2**

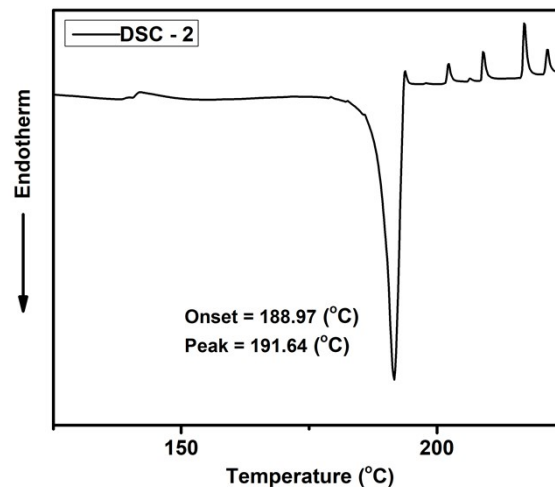

**Complex 3**

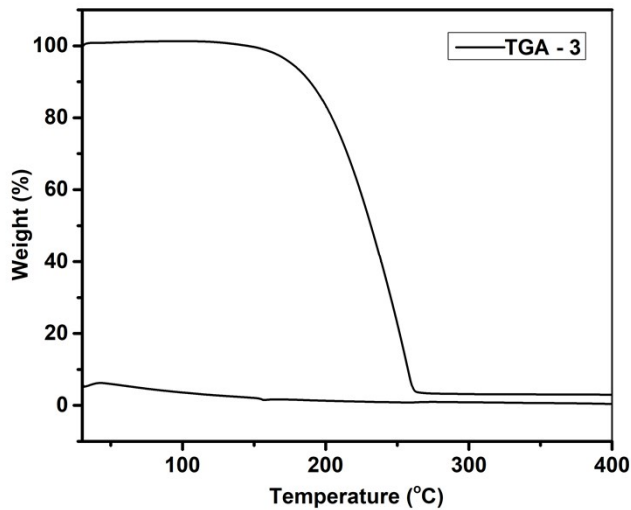

**Complex 3**

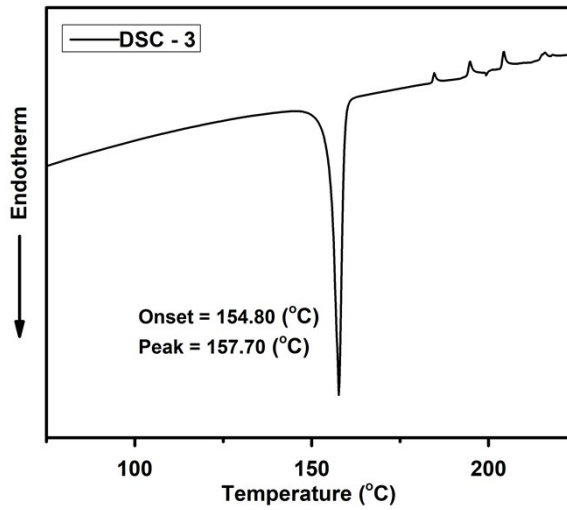

**Complex 4**

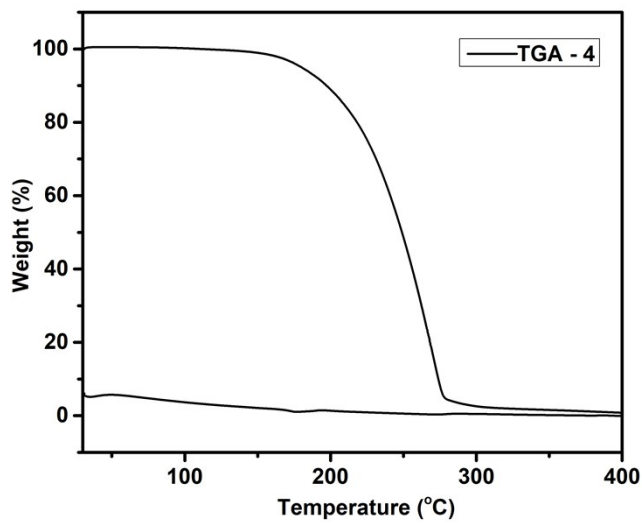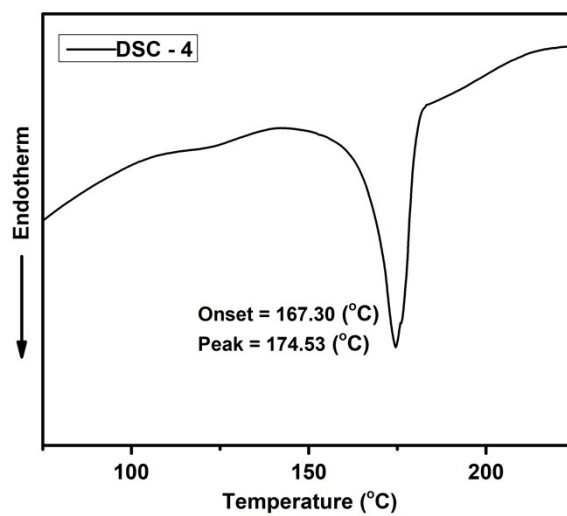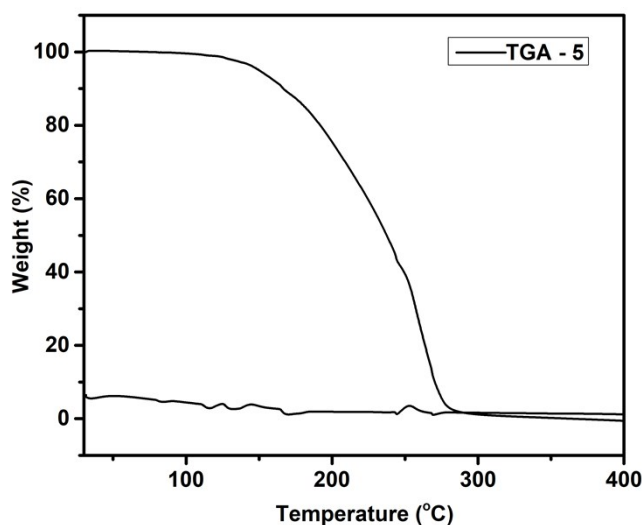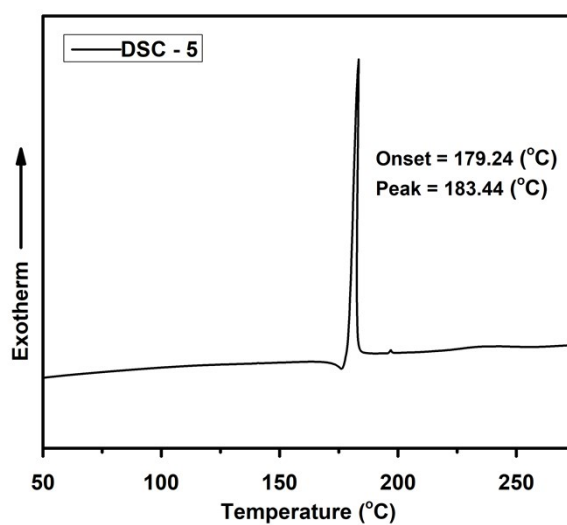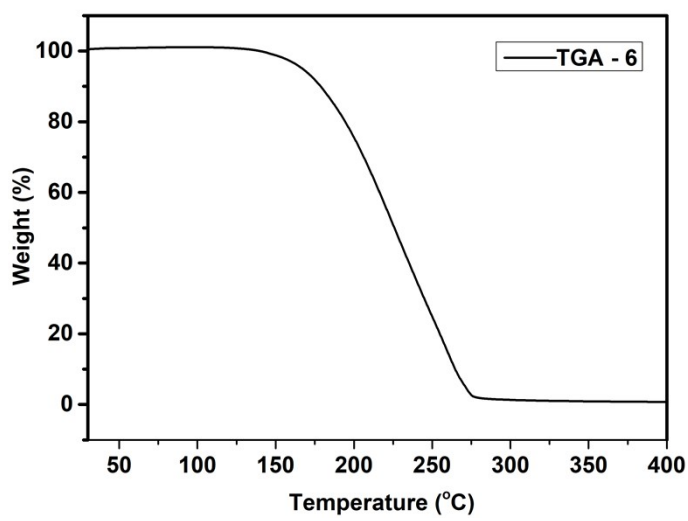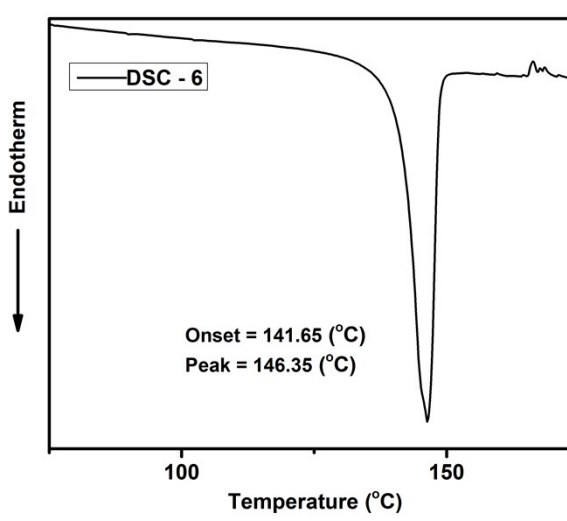

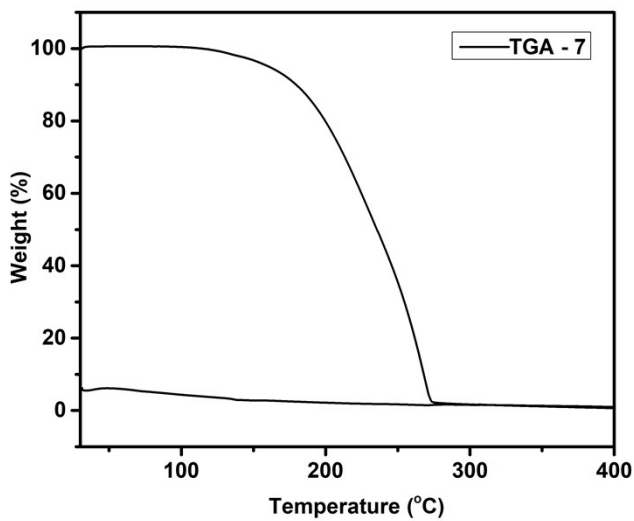

**Complex 8**

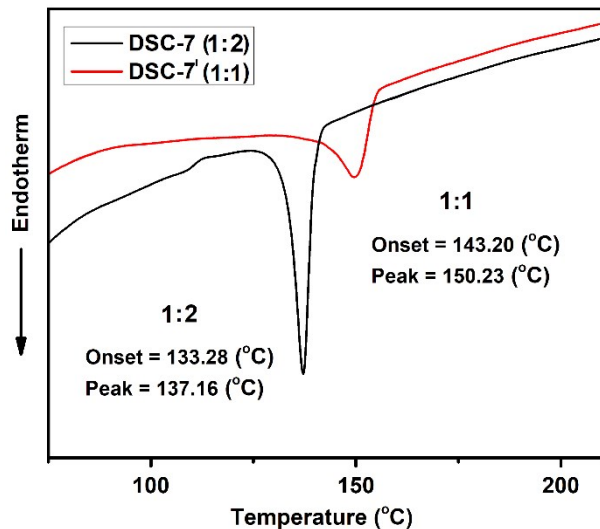

**Complexes 8 and 8'**

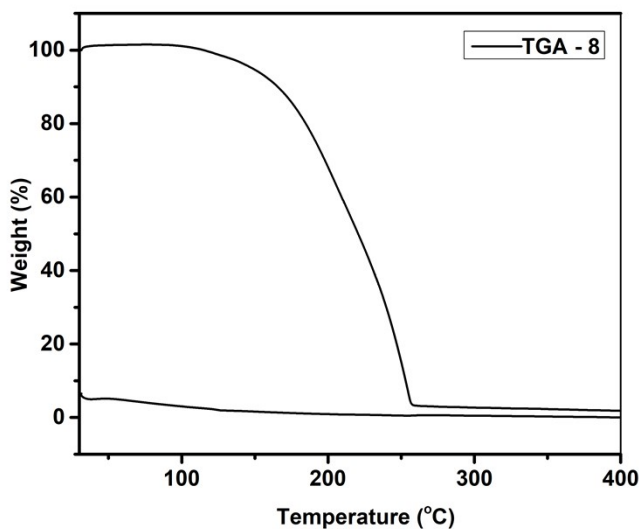

**Complex 9**

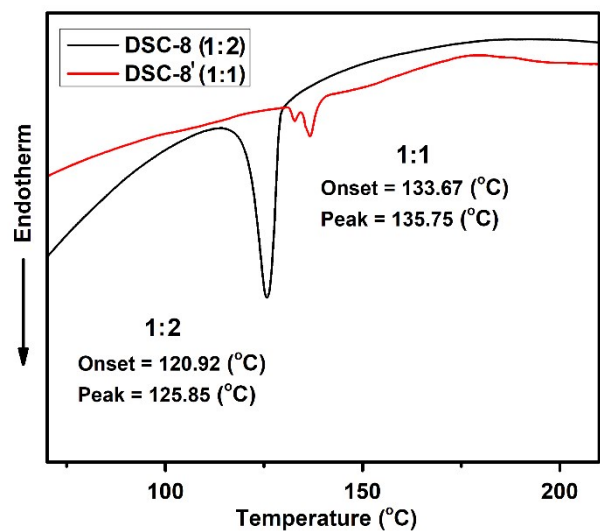

**Complexes 9 and 9'**

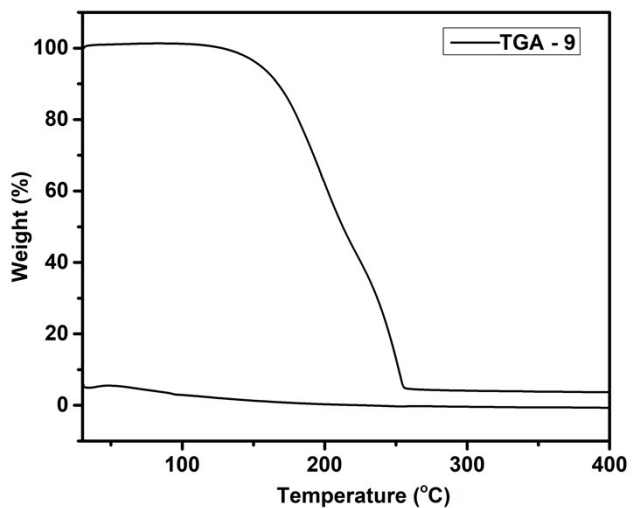

**Complex 10**

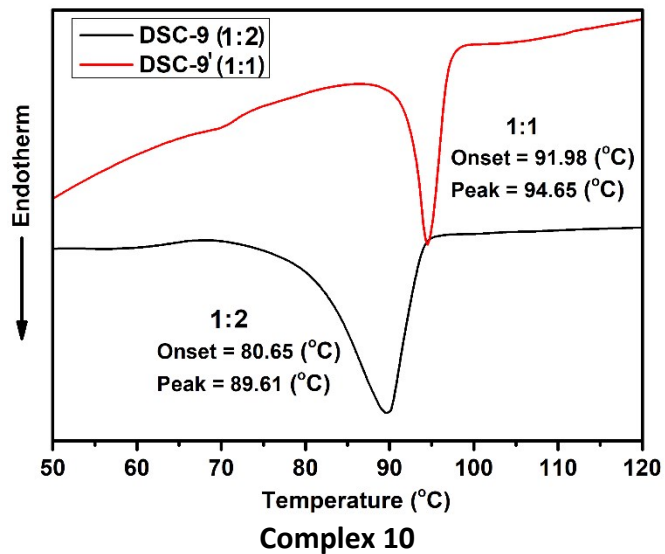

**Complex 10**

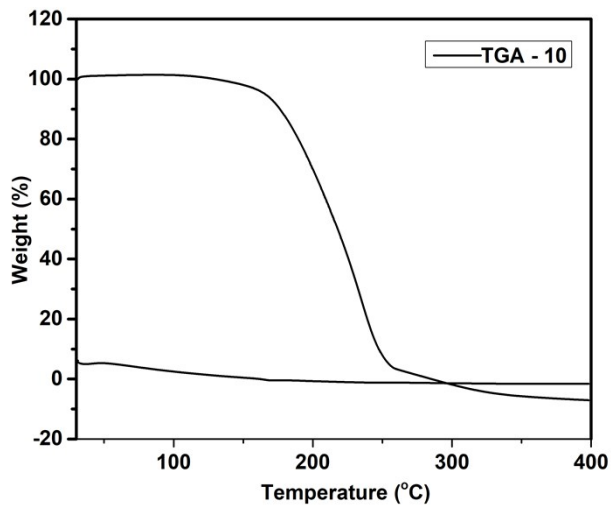

**Complex 11**

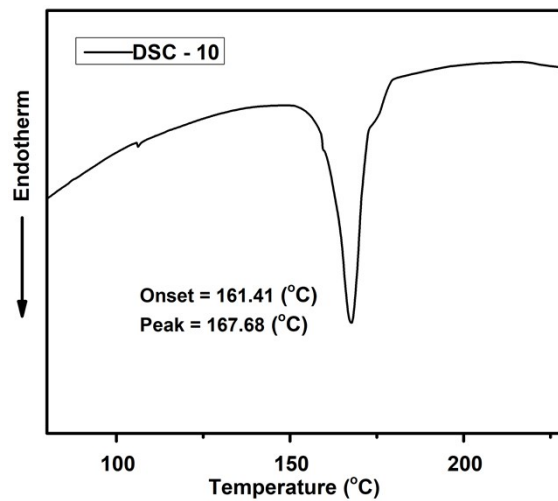

**Complex 11**

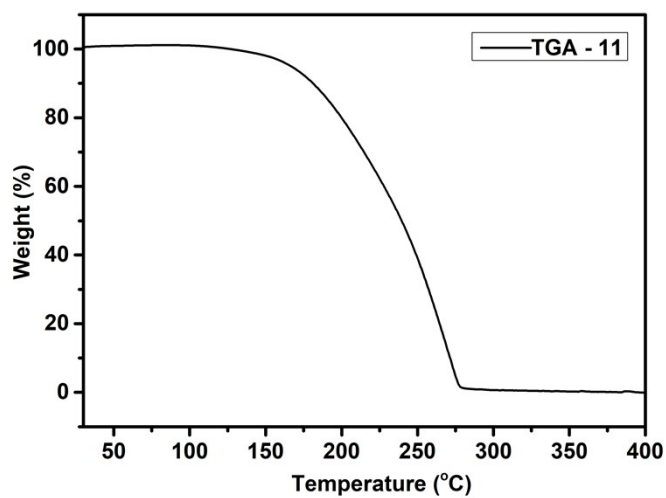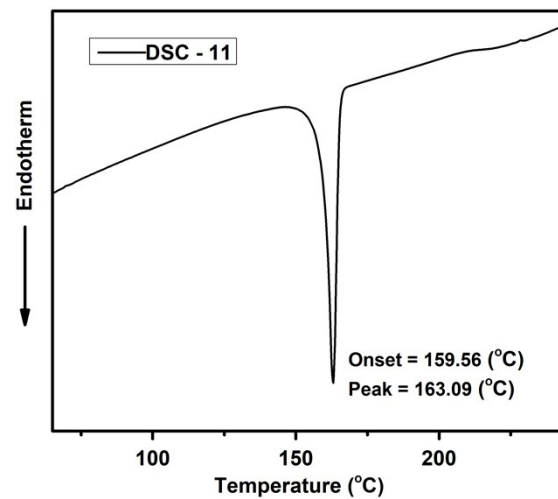

**S11. PXRD patterns for compounds 1-11**

**Complex 1**

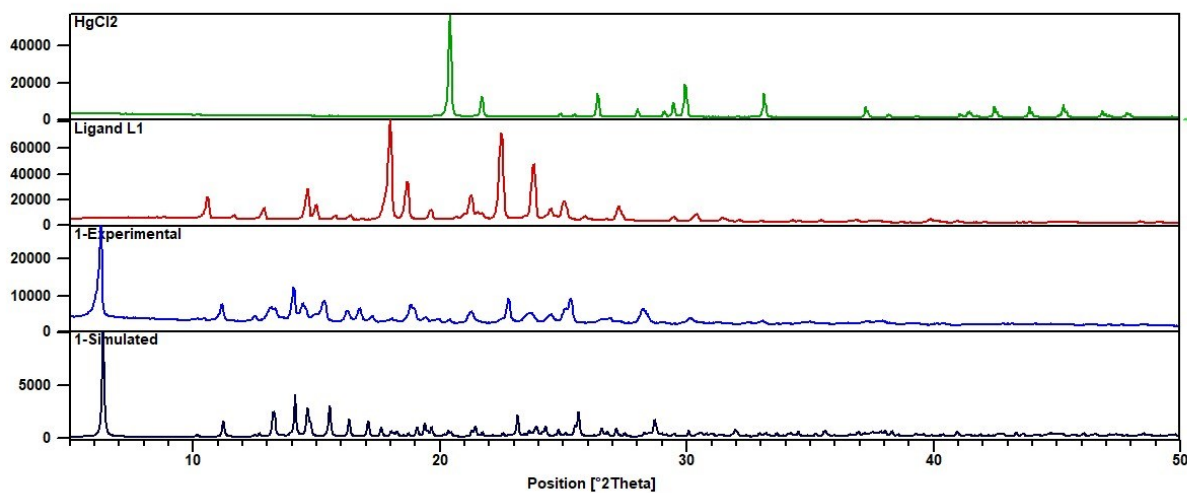

**Complex 2**

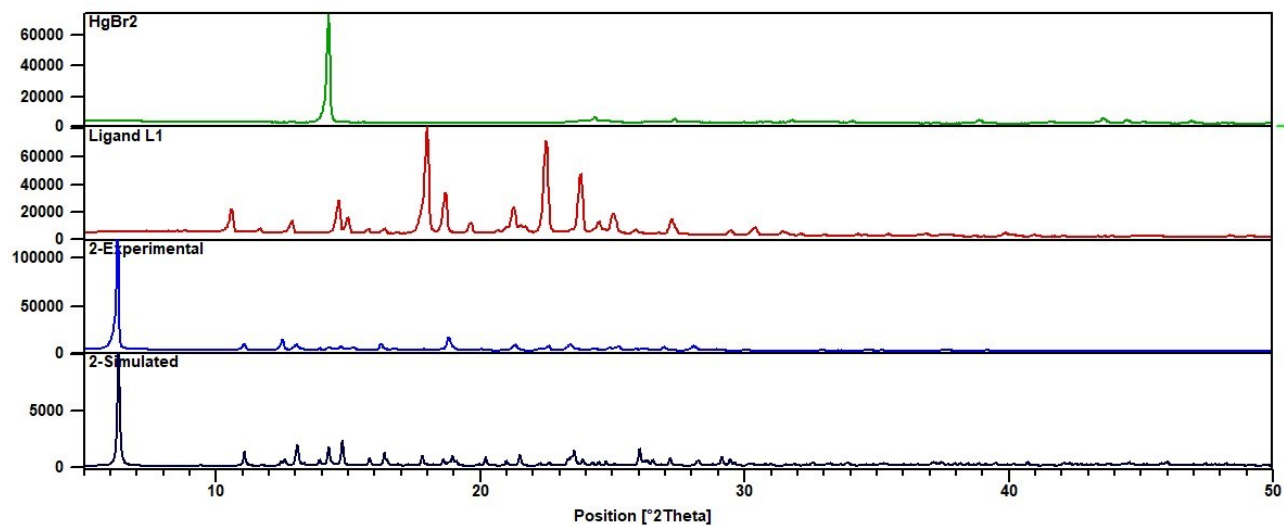

**Complex 3**

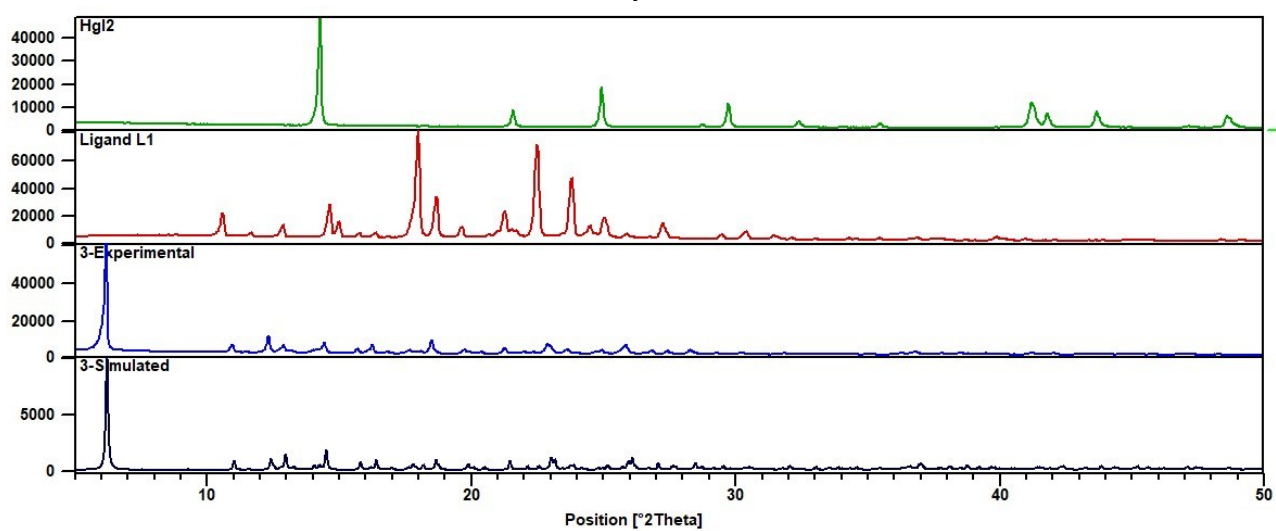

**Complex 4**

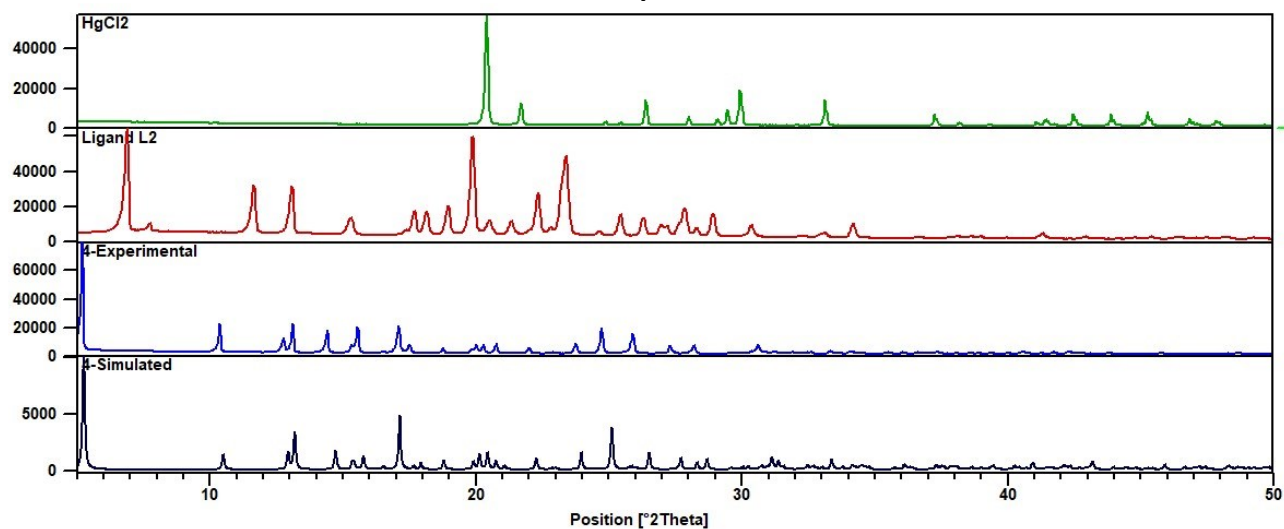

**Complex 5**



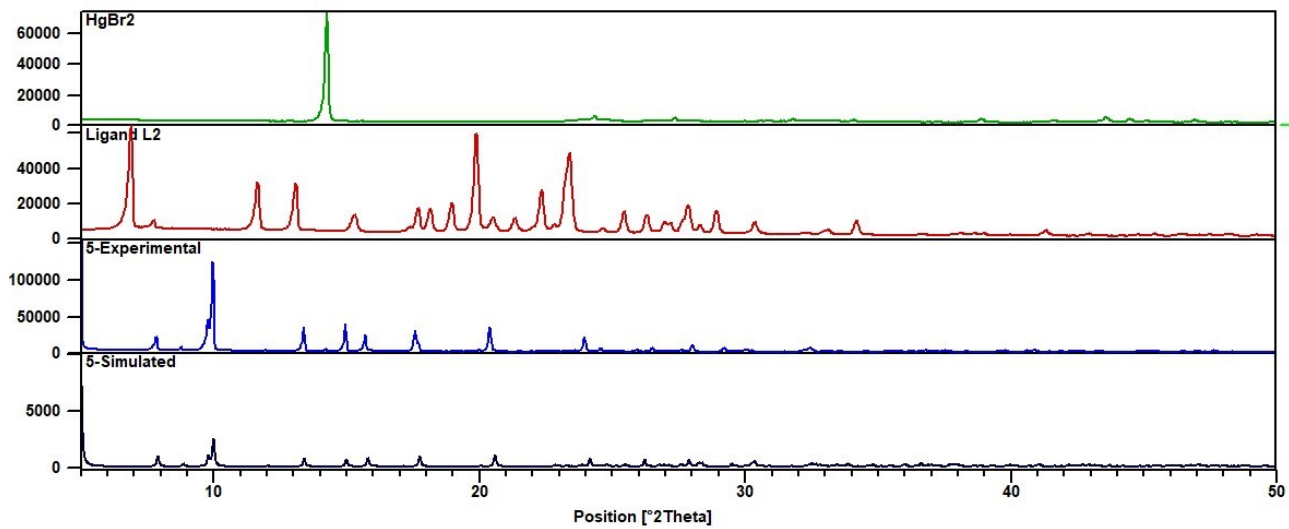

**Complex 6**

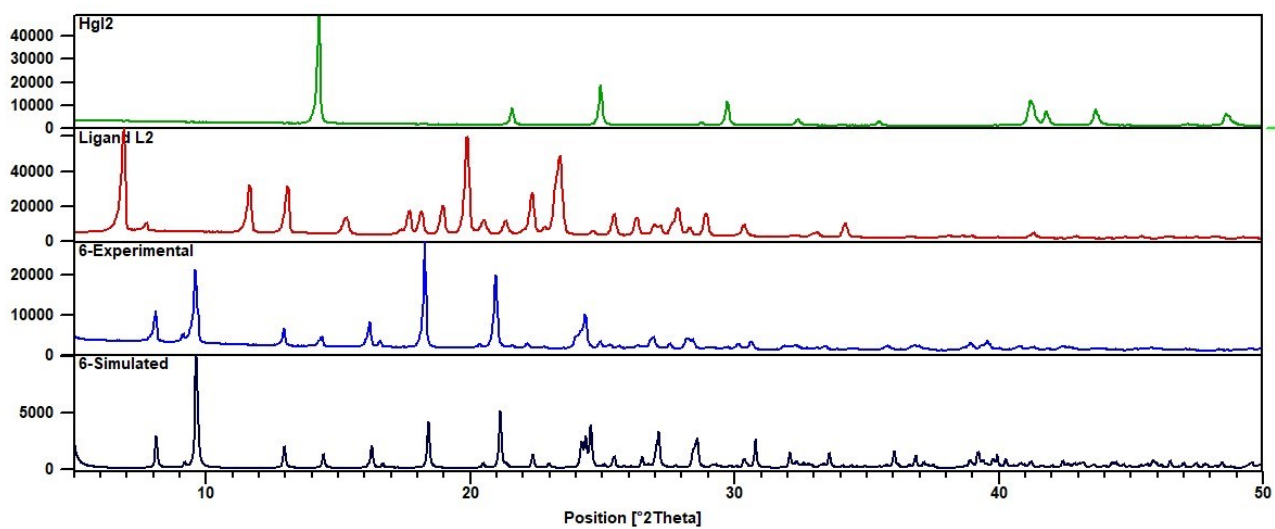

**Complexes 7 and 7'**

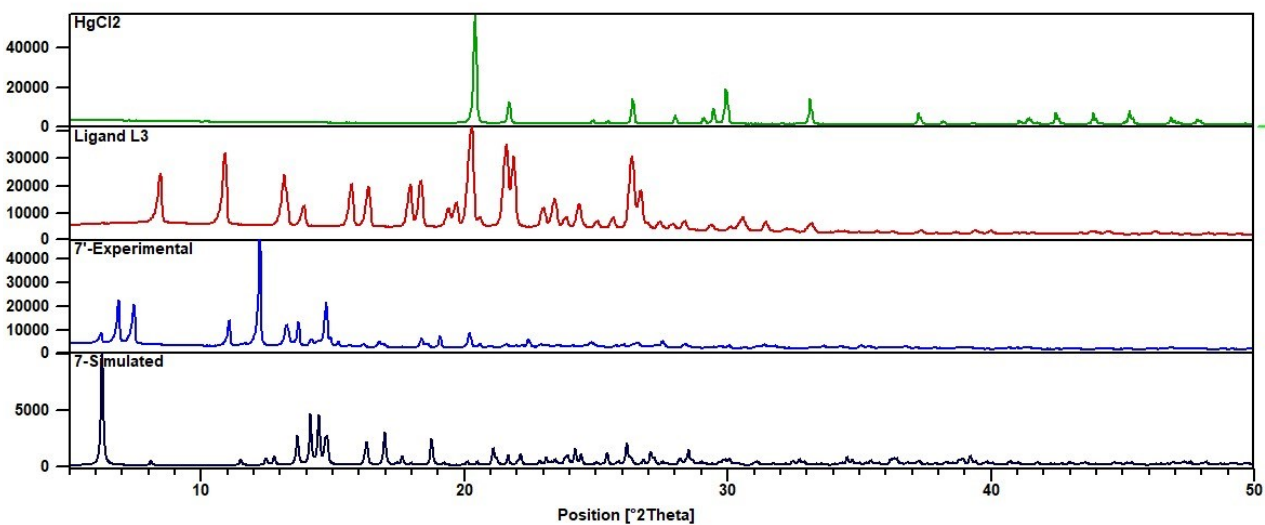

**Complexes 8 and 8'**



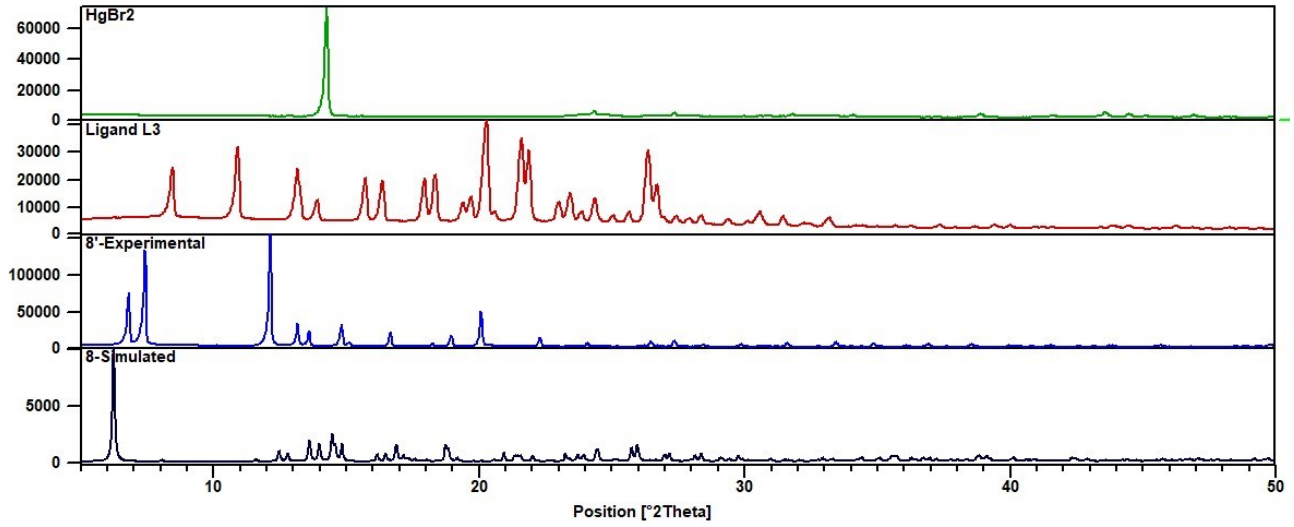

**Complexes 9 and 9'**

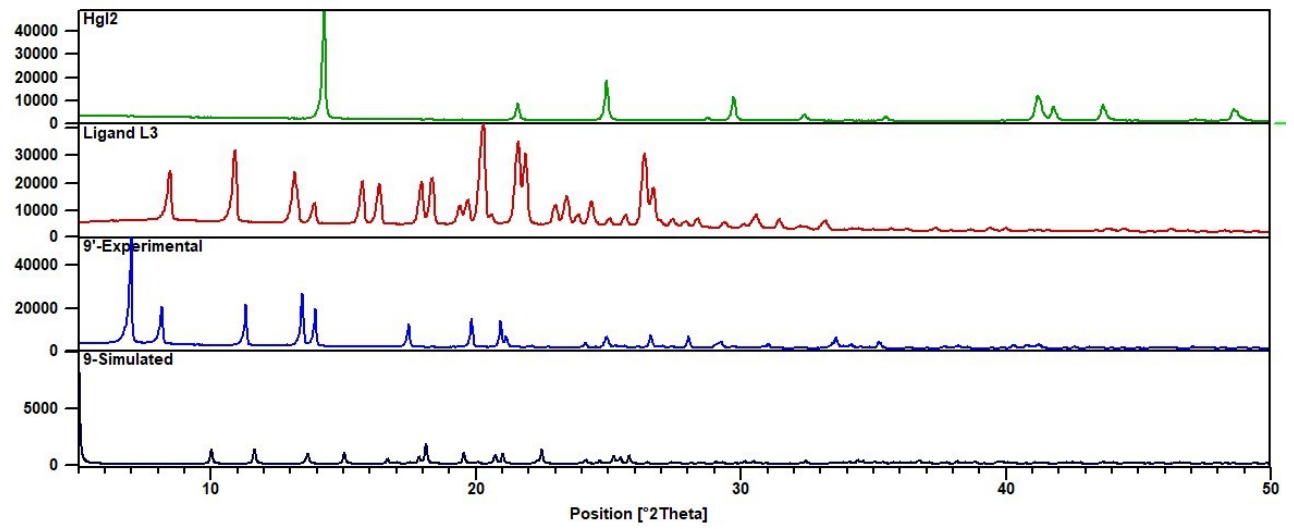

**Complex 10**

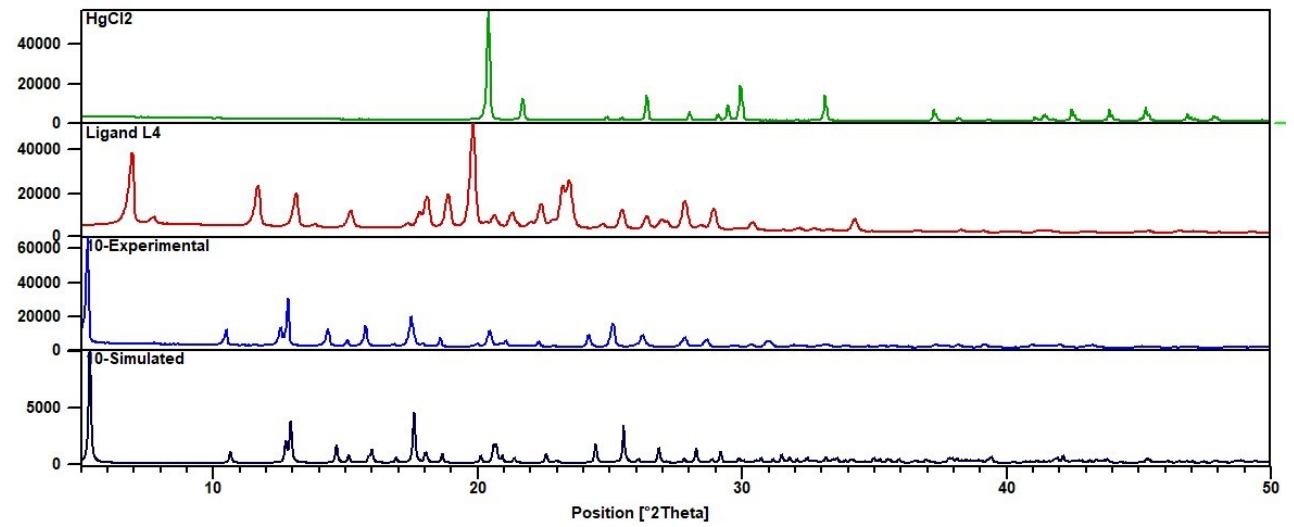

**Complex 11**

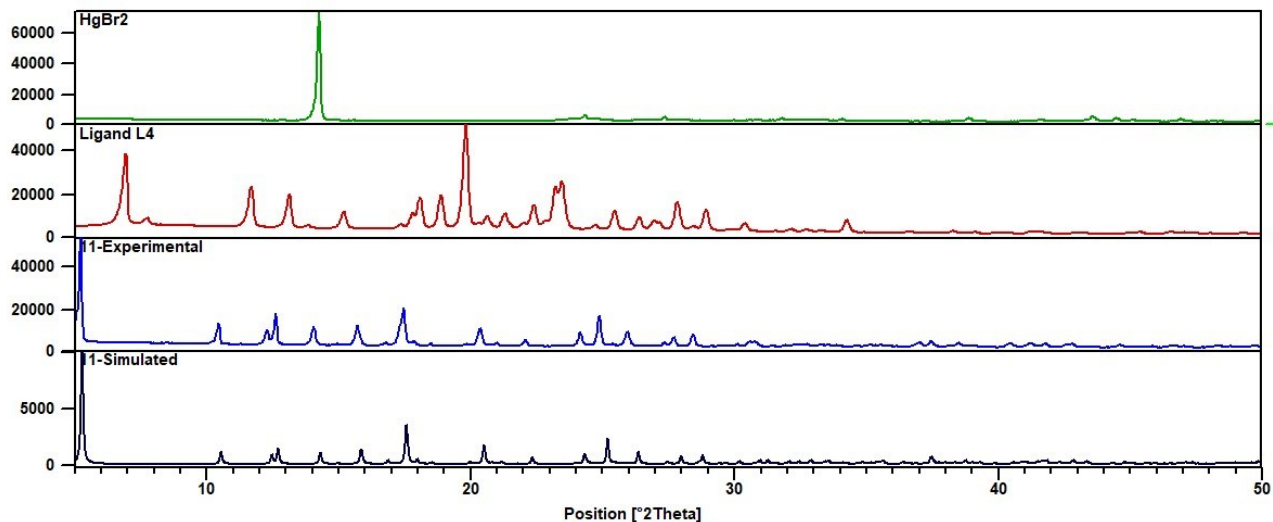

## S12. Intermolecular interactions geometrical parameters and energies for complexes 1-11

| Complex 1                        |                                                         |         |            |                                      |
|----------------------------------|---------------------------------------------------------|---------|------------|--------------------------------------|
| Dimers                           | Interactions                                            | H...A/Å | ∠D-H...A/° | Energy (kcal.mol <sup>-1</sup> )     |
| Dimer 1                          | C <sub>14</sub> -H <sub>14</sub> ...Cl <sub>1</sub>     | 2.65    | 138        | -7.40                                |
|                                  | C <sub>g(py1)</sub> ...C <sub>g(1N2)</sub>              | 3.66    | 8          |                                      |
| Dimer 2                          | C <sub>3</sub> -H <sub>3</sub> ...O <sub>3</sub>        | 2.32    | 178        | -4.79                                |
| Dimer 3                          | C <sub>31</sub> -H <sub>31</sub> ...Cl <sub>2</sub>     | 2.91    | 124        | -9.45                                |
| Dimer 4                          | C <sub>23</sub> -H <sub>23</sub> ...Cl <sub>2</sub>     | 2.59    | 163        | -2.85                                |
| Dimer 5                          | C <sub>19</sub> -H <sub>19</sub> ...C <sub>g(1N1)</sub> | 2.71    | 137        | -5.75                                |
|                                  | C <sub>19</sub> -H <sub>19</sub> ...O <sub>1</sub>      | 2.51    | 132        |                                      |
| Dimer 6                          | C <sub>30</sub> -H <sub>30</sub> ...Cl <sub>2</sub>     | 2.69    | 147        | -37.06                               |
|                                  | C <sub>g(py2)</sub> ...C <sub>g(1N1)</sub>              | 3.53    | 2          |                                      |
| Dimer 7                          | C <sub>24</sub> -H <sub>24</sub> ...C <sub>g(py2)</sub> | 2.67    | 161        | -21.33                               |
|                                  | C <sub>g(py1)</sub> ...C <sub>g(2N2)</sub>              | 3.73    | 8          |                                      |
| Dimer 8                          | C <sub>7</sub> -H <sub>7</sub> ...C <sub>g(1N2)</sub>   | 3.25    | 128        | -3.12                                |
| Dimer 9                          | C <sub>16</sub> -H <sub>16</sub> ...C <sub>g(2N1)</sub> | 3.20    | 144        | -6.48                                |
| <b>Total Dimer Biding Energy</b> |                                                         |         |            | <b>-135.77 kcal.mol<sup>-1</sup></b> |
| Complex 2                        |                                                         |         |            |                                      |
| Dimer 1                          | C <sub>23</sub> -H <sub>23</sub> ...Br <sub>1</sub>     | 2.64    | 166        | -1.80                                |
| Dimer 2                          | C <sub>3</sub> -H <sub>3</sub> ...O <sub>3</sub>        | 2.40    | 174        | -13.72                               |
|                                  | C <sub>24</sub> -H <sub>24</sub> ...C <sub>g(py2)</sub> | 2.87    | 169        |                                      |
|                                  | C <sub>g(py1)</sub> ...C <sub>g(2N1)</sub>              | 3.82    | 7          |                                      |
| Dimer 3                          | C <sub>30</sub> -H <sub>30</sub> ...Br <sub>2</sub>     | 2.91    | 149        | -44.59                               |
|                                  | C <sub>14</sub> -H <sub>14</sub> ...Br <sub>2</sub>     | 2.86    | 144        |                                      |
|                                  | C <sub>g(py1)</sub> ...C <sub>g(2N1)</sub>              | 3.59    | 2          |                                      |
|                                  | C <sub>g(py2)</sub> ...C <sub>g(1N2)</sub>              | 3.64    | 7          |                                      |
| Dimer 4                          | C <sub>7</sub> -H <sub>7</sub> ...C <sub>g(1N2)</sub>   | 3.19    | 129        | -3.21                                |
| Dimer 5                          | C <sub>19</sub> -H <sub>19</sub> ...C <sub>g(1N1)</sub> | 2.64    | 143        | -6.86                                |
|                                  | C <sub>19</sub> -H <sub>19</sub> ...O <sub>1</sub>      | 2.55    | 126        |                                      |
|                                  | C <sub>20</sub> -H <sub>20</sub> ...O <sub>1</sub>      | 2.70    | 120        |                                      |
| Dimer 6                          | C <sub>16</sub> -H <sub>16</sub> ...C <sub>g(2N1)</sub> | 3.21    | 141        | -7.46                                |
| <b>Total Dimer Biding Energy</b> |                                                         |         |            | <b>-77.64 kcal.mol<sup>-1</sup></b>  |
| Complex 3                        |                                                         |         |            |                                      |
| Dimer 1                          | C <sub>23</sub> -H <sub>23</sub> ...I <sub>1</sub>      | 2.84    | 168        | -1.24                                |

|                                  |                                   |      |     |                                     |
|----------------------------------|-----------------------------------|------|-----|-------------------------------------|
| Dimer 2                          | $C_3-H_3 \cdots O_3$              | 2.46 | 168 | -12.31                              |
|                                  | $C_{24}-H_{24} \cdots C_{g(py2)}$ | 3.32 | 170 |                                     |
|                                  | $C_{g(py1)} \cdots C_{g(2N1)}$    | 3.96 | 6   |                                     |
| Dimer 3                          | $C_{30}-H_{30} \cdots I_2$        | 3.07 | 138 | -43.63                              |
|                                  | $C_{14}-H_{14} \cdots I_2$        | 3.03 | 148 |                                     |
|                                  | $C_{g(py1)} \cdots C_{g(1N2)}$    | 3.69 | 3   |                                     |
|                                  | $C_{g(py2)} \cdots C_{g(1N1)}$    | 3.63 | 6   |                                     |
|                                  | $C_9-H_9 \cdots I_1$              | 3.12 | 126 |                                     |
| Dimer 4                          | $C_7-H_7 \cdots C_{g(1N2)}$       | 3.00 | 133 | -4.15                               |
| Dimer 5                          | $C_{19}-H_{19} \cdots C_{g(1N1)}$ | 2.61 | 141 | -7.16                               |
|                                  | $C_{19}-H_{19} \cdots O_1$        | 2.50 | 126 |                                     |
|                                  | $C_{20}-H_{20} \cdots O_1$        | 2.69 | 119 |                                     |
| Dimer 6                          | $C_{16}-H_{16} \cdots C_{g(2N1)}$ | 3.27 | 144 | -7.11                               |
| <b>Total Dimer Biding Energy</b> |                                   |      |     | <b>-75.6 kcal.mol<sup>-1</sup></b>  |
| <b>Complex 4</b>                 |                                   |      |     |                                     |
| Dimer 1                          | $C_3-H_3 \cdots Cl_1$             | 3.03 | 138 | -33.18                              |
| Dimer 2                          | $C_4-H_4 \cdots O_1$              | 2.55 | 148 | -6.70                               |
|                                  | $C_6-H_6 \cdots O_1$              | 2.70 | 144 |                                     |
| Dimer 3                          | $C_{14}-H_{14} \cdots Cl_1$       | 2.77 | 121 | -9.89                               |
| Dimer 4                          | $C_9-H_9 \cdots C_{g(2N)}$        | 2.55 | 132 | -6.69                               |
|                                  | $C_8-H_8 \cdots C_{g(1N)}$        | 3.04 | 121 |                                     |
| <b>Total Dimer Biding Energy</b> |                                   |      |     | <b>-56.46 kcal.mol<sup>-1</sup></b> |
| <b>Complex 5</b>                 |                                   |      |     |                                     |
| Dimer 1                          | $C_{g(py)} \cdots C_{g(py)}$      | 3.96 | 0   | -12.34                              |
|                                  | $C_{g(1N)} \cdots C_{g(1N)}$      | 3.96 | 0   |                                     |
|                                  | $C_{g(2N)} \cdots C_{g(2N)}$      | 3.96 | 0   |                                     |
|                                  | $C_{g(1N)} \cdots C_{g(2N)}$      | 3.79 | 0   |                                     |
|                                  | $C_3-H_3 \cdots O_3$              | 2.75 | 132 |                                     |
| Dimer 2                          | $C_4-H_4 \cdots O_1$              | 2.32 | 162 | -8.58                               |
| Dimer 3                          | $C_{16}-H_{16} \cdots C_{g(2N)}$  | 3.52 | 135 | -5.82                               |
| Dimer 4                          | $C_9-H_9 \cdots O_{2b}$           | 3.10 | 173 | -3.13                               |
| Dimer 5                          | $C_{15}-H_{15} \cdots Br_2$       | 2.91 | 137 | -9.10                               |
| <b>Total Dimer Biding Energy</b> |                                   |      |     | <b>-38.97 kcal.mol<sup>-1</sup></b> |
| <b>Complex 6</b>                 |                                   |      |     |                                     |
| Dimer 1                          | $C_{g(1N)} \cdots C_{g(2N)}$      | 3.87 | 0   | -11.32                              |
|                                  | $C_3-H_3 \cdots O_1$              | 2.82 | 136 |                                     |
| Dimer 2                          | $C_4-H_4 \cdots O_1$              | 2.35 | 161 | -8.23                               |
|                                  | $C_7-H_7 \cdots I_1$              | 3.09 | 130 |                                     |
| Dimer 3                          | $C_{16}-H_{16} \cdots C_{g(2N)}$  | 3.51 | 130 | -6.86                               |
| Dimer 4                          | $C_9-H_9 \cdots O_{2b}$           | 3.02 | 176 | -3.60                               |
|                                  | $C_8-H_8 \cdots C_{g(py)}$        | 3.51 | 139 |                                     |
| Dimer 5                          | $C_{15}-H_{15} \cdots I_2$        | 3.15 | 130 | -6.28                               |
| <b>Total Dimer Biding Energy</b> |                                   |      |     | <b>-36.29 kcal.mol<sup>-1</sup></b> |
| <b>Complex 7</b>                 |                                   |      |     |                                     |
| Dimer 1                          | $C_{22}-H_{22} \cdots Cl_1$       | 2.51 | 155 | -2.49                               |
| Dimer 2                          | $C_{18}-H_{18} \cdots N_2$        | 2.60 | 152 | -5.24                               |
|                                  | $C_{17}-H_{17} \cdots O_1$        | 2.31 | 154 |                                     |
| Dimer 3                          | $C_8-H_8 \cdots N_4$              | 2.72 | 133 | -6.97                               |
|                                  | $C_7-H_7 \cdots O_3$              | 2.18 | 167 |                                     |
| Dimer 4                          | $C_4-H_4 \cdots O_1$              | 2.46 | 132 | -14.57                              |

|                                  |                                                         |      |     |                                      |
|----------------------------------|---------------------------------------------------------|------|-----|--------------------------------------|
|                                  | C <sub>6</sub> -H <sub>6</sub> ...O <sub>1</sub>        | 2.72 | 129 |                                      |
| <b>Dimer 5</b>                   | C <sub>14</sub> -H <sub>14</sub> ...Cl <sub>2</sub>     | 2.51 | 149 | -43.78                               |
| <b>Dimer 6</b>                   | C <sub>g(pz)</sub> ...C <sub>g(1N1)</sub>               | 3.66 | 4   | -39.61                               |
| <b>Dimer 7</b>                   | C <sub>15</sub> -H <sub>15</sub> ...O <sub>3</sub>      | 2.60 | 153 | -23.76                               |
|                                  | C <sub>23</sub> -H <sub>23</sub> ...C <sub>g(Pz2)</sub> | 3.10 | 174 |                                      |
| <b>Total Dimer Biding Energy</b> |                                                         |      |     | <b>-136.42 kcal.mol<sup>-1</sup></b> |
| <b>Complex 8</b>                 |                                                         |      |     |                                      |
| <b>Dimer 1</b>                   | C <sub>22</sub> -H <sub>22</sub> ...Br <sub>2</sub>     | 2.67 | 148 | -2.27                                |
| <b>Dimer 2</b>                   | C <sub>18</sub> -H <sub>18</sub> ...N <sub>2</sub>      | 2.45 | 147 | -5.48                                |
|                                  | C <sub>17</sub> -H <sub>17</sub> ...O <sub>1</sub>      | 2.33 | 157 |                                      |
| <b>Dimer 3</b>                   | C <sub>8</sub> -H <sub>8</sub> ...N <sub>4</sub>        | 2.71 | 128 | -7.22                                |
|                                  | C <sub>7</sub> -H <sub>7</sub> ...O <sub>3</sub>        | 2.18 | 169 |                                      |
| <b>Dimer 4</b>                   | C <sub>4</sub> -H <sub>4</sub> ...O <sub>1</sub>        | 2.43 | 132 | -14.87                               |
|                                  | C <sub>6</sub> -H <sub>6</sub> ...O <sub>1</sub>        | 2.65 | 128 |                                      |
| <b>Dimer 5</b>                   | C <sub>14</sub> -H <sub>14</sub> ...Br <sub>1</sub>     | 2.65 | 146 | -43.56                               |
|                                  | C <sub>24</sub> -H <sub>24</sub> ...Br <sub>1</sub>     | 3.03 | 133 |                                      |
| <b>Dimer 6</b>                   | C <sub>g(PZ2)</sub> ...C <sub>g(1N1)</sub>              | 3.63 | 5   | -41.63                               |
| <b>Dimer 7</b>                   | C <sub>15</sub> -H <sub>15</sub> ...O <sub>3</sub>      | 2.71 | 151 | -22.40                               |
|                                  | C <sub>23</sub> -H <sub>23</sub> ...C <sub>g(PZ2)</sub> | 3.33 | 175 |                                      |
|                                  | C <sub>g(PZ1)</sub> ...C <sub>g(1N2)</sub>              | 3.67 | 2   |                                      |
| <b>Total Dimer Biding Energy</b> |                                                         |      |     | <b>-137.43 kcal.mol<sup>-1</sup></b> |
| <b>Complex 9</b>                 |                                                         |      |     |                                      |
| <b>Dimer 1</b>                   | C <sub>2</sub> -H <sub>2</sub> ...O <sub>2</sub>        | 2.68 | 144 | -35.35                               |
|                                  | C <sub>9</sub> -H <sub>9</sub> ...I <sub>1</sub>        | 3.08 | 148 |                                      |
|                                  | C <sub>g(1N)</sub> ...C <sub>g(2N)</sub>                | 3.94 | 2   |                                      |
| <b>Dimer 2</b>                   | C <sub>3</sub> -H <sub>3</sub> ...C <sub>g(1N)</sub>    | 2.99 | 135 | -4.60                                |
| <b>Dimer 3</b>                   | C <sub>8</sub> -H <sub>8</sub> ...N <sub>2</sub>        | 2.62 | 138 | -8.35                                |
|                                  | C <sub>7</sub> -H <sub>7</sub> ...O <sub>1</sub>        | 2.38 | 173 |                                      |
| <b>Total Dimer Biding Energy</b> |                                                         |      |     | <b>-48.3 kcal.mol<sup>-1</sup></b>   |
| <b>Complex 10</b>                |                                                         |      |     |                                      |
| <b>Dimer 1</b>                   | C <sub>3</sub> -H <sub>3</sub> ...Cl <sub>1</sub>       | 3.06 | 138 | -37.90                               |
| <b>Dimer 2</b>                   | C <sub>9</sub> -H <sub>9</sub> ...C <sub>g(2N)</sub>    | 2.55 | 133 | -6.48                                |
|                                  | C <sub>8</sub> -H <sub>8</sub> ...C <sub>g(1N)</sub>    | 3.10 | 120 |                                      |
| <b>Dimer 3</b>                   | C <sub>6</sub> -H <sub>6</sub> ...O <sub>1</sub>        | 2.48 | 146 | -11.74                               |
|                                  | C <sub>4</sub> -H <sub>4</sub> ...O <sub>1</sub>        | 2.53 | 144 |                                      |
|                                  | C <sub>4</sub> -H <sub>4</sub> ...N <sub>2</sub>        | 2.61 | 143 |                                      |
| <b>Dimer 4</b>                   | C <sub>g(PZ)</sub> ...C <sub>g(1N)</sub>                | 3.60 | 3   | -26.44                               |
| <b>Dimer 5</b>                   | C <sub>14</sub> -H <sub>14</sub> ...Cl <sub>1</sub>     | 2.79 | 130 | -10.29                               |
| <b>Total Dimer Biding Energy</b> |                                                         |      |     | <b>-92.85 kcal.mol<sup>-1</sup></b>  |
| <b>Complex 11</b>                |                                                         |      |     |                                      |
| <b>Dimer 1</b>                   | C <sub>3</sub> -H <sub>3</sub> ...Br <sub>1</sub>       | 3.10 | 137 | -36.32                               |
| <b>Dimer 2</b>                   | C <sub>9</sub> -H <sub>9</sub> ...C <sub>g2N</sub>      | 2.56 | 134 | -6.53                                |
|                                  | C <sub>8</sub> -H <sub>8</sub> ...C <sub>g1N</sub>      | 3.12 | 119 |                                      |
| <b>Dimer 3</b>                   | C <sub>6</sub> -H <sub>6</sub> ...O <sub>1</sub>        | 2.48 | 149 | -11.62                               |
|                                  | C <sub>4</sub> -H <sub>4</sub> ...O <sub>1</sub>        | 2.65 | 144 |                                      |
|                                  | C <sub>4</sub> -H <sub>4</sub> ...N <sub>2</sub>        | 2.57 | 146 |                                      |
| <b>Dimer 4</b>                   | C <sub>g(PZ)</sub> ...C <sub>g(1N)</sub>                | 3.66 | 5   | -25.24                               |
| <b>Dimer 5</b>                   | C <sub>14</sub> -H <sub>14</sub> ...Br <sub>1</sub>     | 2.90 | 130 | -8.66                                |
| <b>Total Dimer Biding Energy</b> |                                                         |      |     | <b>-88.37 kcal.mol<sup>-1</sup></b>  |

**S13. Representation of dimer2 (a), dimer3 (b), dimer4 (c), dimer5 (d), dimer7 (e), dimer8 (f), and dimer9 (g) with calculated binding energy for the dimers in complex 1**

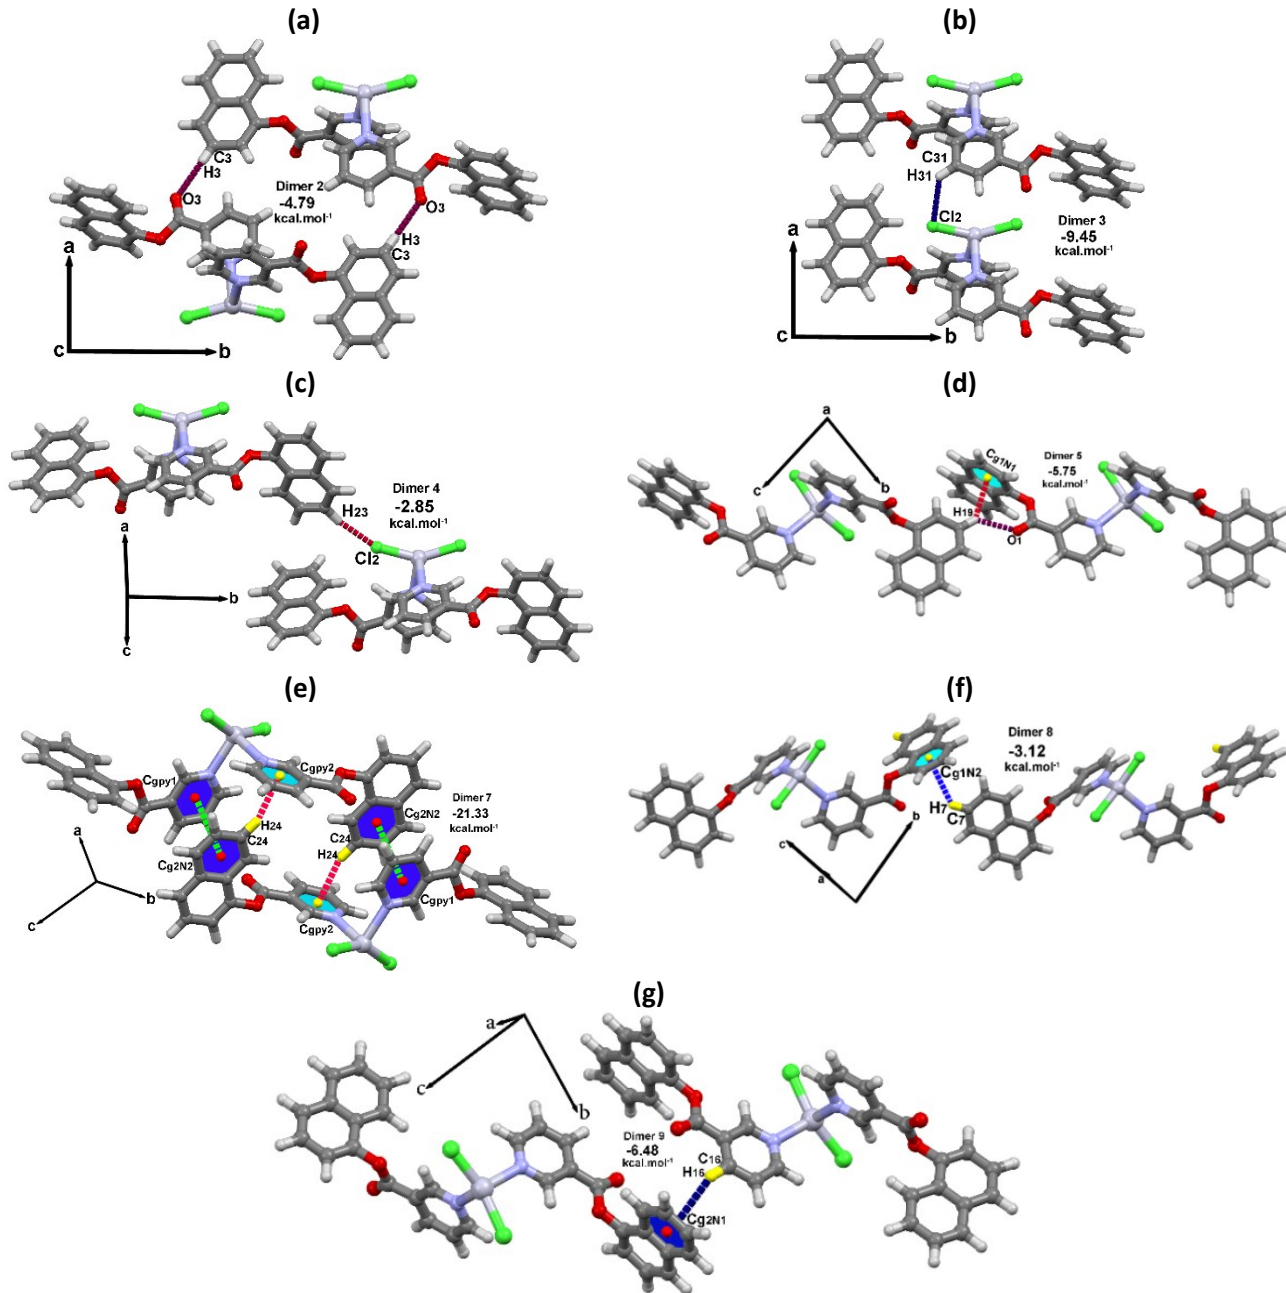

**Complex 1**

Dimer2 in complex 1 which formed by two symmetric interactions of  $C_3-H_3\cdots O_3$  ( $-4.79 \text{ kcal.mol}^{-1}$ ) is presented in figure S13a. Dimer3 with binding energy of  $-9.45 \text{ kcal.mol}^{-1}$  contains  $C_{31}-H_{31}\cdots Cl_2$  interaction which shaped in fishbone style, figure S13b.  $Cl_2$  as double acceptor engaged in  $C_{23}-H_{23}\cdots Cl_2$  interaction to create dimer4 with  $-2.85 \text{ kcal.mol}^{-1}$  energy and staircase style, figure S13c. Bifurcated interactions for  $H_{19}$  in dimer5, made  $C_{19}-H_{19}\cdots C_{g1N1}$  and  $C_{19}-H_{19}\cdots O_1$  in which the

structure enlarged diametrically in *ab*-plane, figure S13d. The total energy for this dimer was calculated as  $-5.75 \text{ kcal.mol}^{-1}$ . There are two  $\text{C-H}\cdots\pi$  interactions of  $\text{C}_{24}\text{-H}_{24}\cdots\text{C}_{\text{gPy}2}$  and two  $\pi\cdots\pi$  interaction of  $\text{C}_{\text{gPy}1}\cdots\text{C}_{\text{g}2\text{N}2}$  which made dimer7 with the energy of  $-21.33 \text{ kcal.mol}^{-1}$ , figure S13e.  $\text{C}_7\text{-H}_7\cdots\text{C}_{\text{g}1\text{N}2}$  created dimer8 with the energy of  $-3.12 \text{ kcal.mol}^{-1}$  (figure S13f) and  $\text{C}_{16}\text{-H}_{16}\cdots\text{C}_{\text{g}2\text{N}1}$  formed dimer9 with the energy of  $-6.48 \text{ kcal.mol}^{-1}$  (figure S13g).

**S14. Representation of dimer1 (a), dimer2 (b), dimer4 (c), and dimer5 (d) with calculated binding energy for the dimers in complex 2**

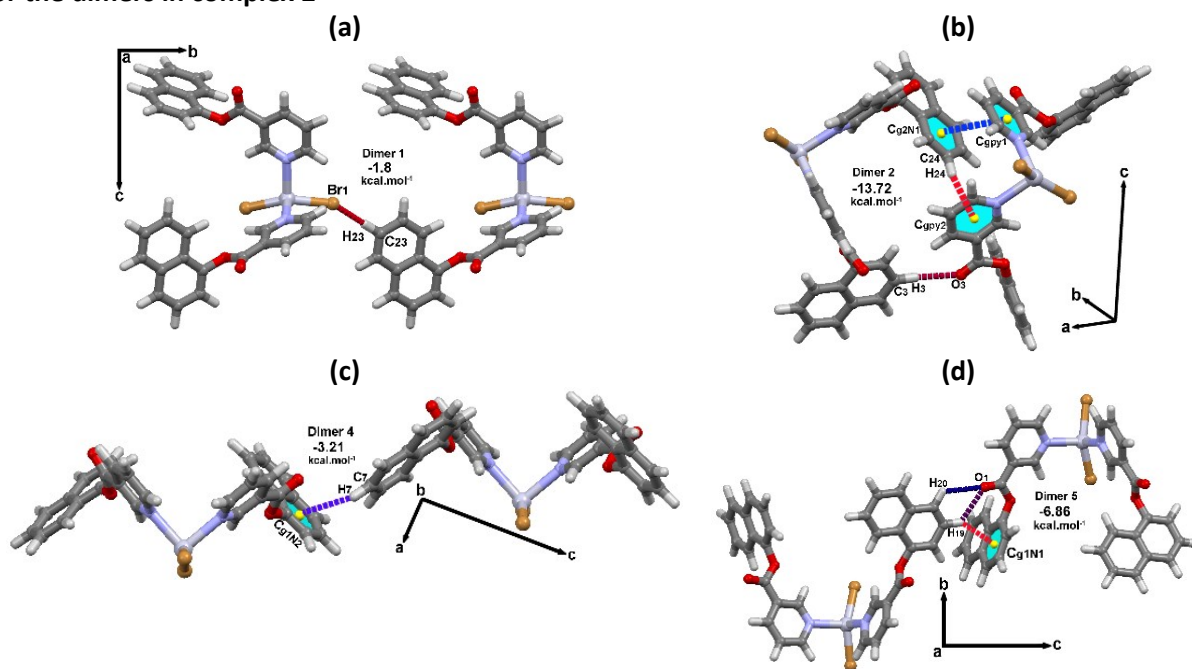

**S15. Representation of dimer1 (a), dimer2 (b), dimer4 (c), and dimer5 (d) with calculated binding energy for the dimers in complex 3**

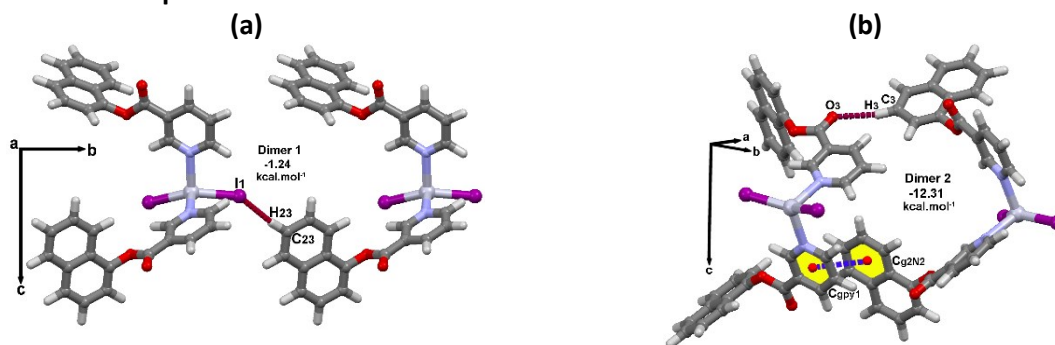



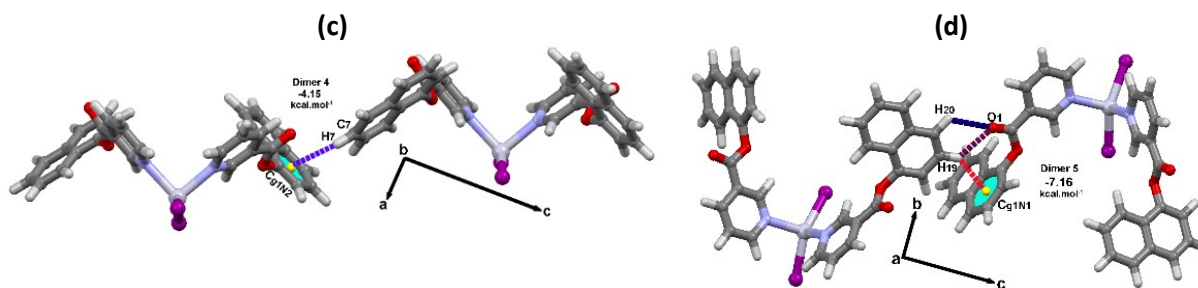

### Complexes 2 and 3

As it is shown in the figures S14a and S15a,  $C_{23}-H_{23}\cdots Br_1/I_1$  (dimer1) occurred between two molecules of the complexes via pearl-like region with the energies of -1.8 and -1.24 kcal.mol<sup>-1</sup>, respectively.  $C_{gPY1}\cdots C_{g2N1}$ ,  $C_{24}-H_{24}\cdots C_{gPY2}$  and  $C_3-H_3\cdots O_3$  (dimer2) exhibited in figure S14b occurred between the ligands of two molecules with the energy of -13.72 kcal.mol<sup>-1</sup>.  $C_{gPY1}\cdots C_{g2N2}$  and  $C_3-H_3\cdots O_3$  with the energy of -12.31 kcal.mol<sup>-1</sup> happened in complex 3 that are demonstrated as dimer2 in figure S15b as well.  $C_7-H_7\cdots C_{g1N2}$  (dimer4) interaction for both of the complexes is depicted in the figures S14c and S15c with the energy of -3.21 and -4.15 kcal.mol<sup>-1</sup>, respectively. In figures S14d and S15d, bifurcated interactions of  $O_1$  ( $C_{20}-H_{20}\cdots O_1$ ,  $C_{19}-H_{19}\cdots O_1$ ) alongside  $C_{19}-H_{19}\cdots C_{g1N1}$  made dimer5 with the energy of -6.86 and -7.15 kcal.mol<sup>-1</sup> for compounds 2 and 3, respectively.

### S16. Representation of dimer2 (a) and dimer4 (b) with calculated binding energy for the dimers in complex 4

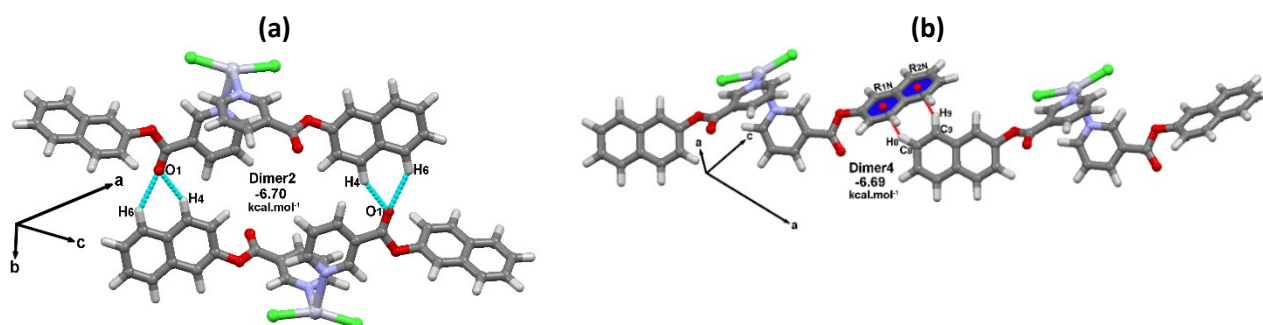

### Complex 4

The ligands of complex molecules contacted to each other with two symmetrical bifurcated  $C_4-H_4\cdots O_1$  and  $C_6-H_6\cdots O_1$  interactions to make dimer2 with the energy of -6.69 kcal.mol<sup>-1</sup>, figure S16a. In the figure S16b, the molecules in dimer4 propagated in linear shape accompanying two  $C-H\cdots\pi$  contacts of  $C_8-H_8\cdots C_{g1N}$  and  $C_9-H_9\cdots C_{g2N}$ . The contacts in dimer4 presented the energy of -6.69 kcal.mol<sup>-1</sup>.

S17. Representation of dimer2 (a), dimer4 (b), and dimer5 (c) with calculated binding energy for the dimers in complex 5

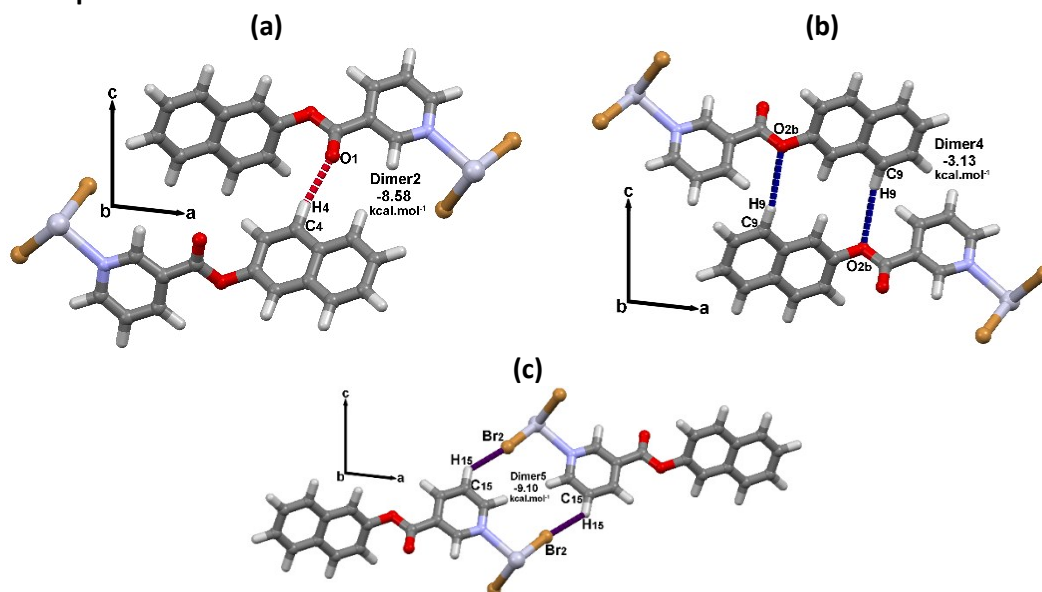

S18. Representation of dimer2 (a), dimer4 (b), and dimer5 (c) with calculated binding energy for the dimers in complex 6

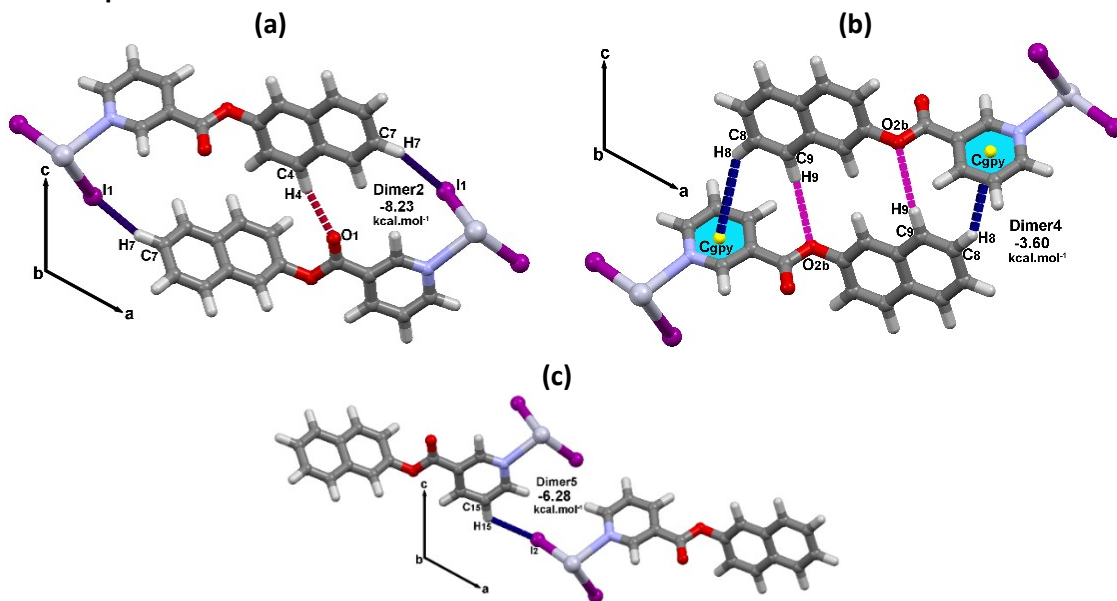

### Complexes 5, 6

The interconnection among organic parts of these complexes occurred through three interactions of C-H...O, C-H... $\pi$  and C-H...X. C<sub>4</sub>-H<sub>4</sub>...O<sub>1</sub> with the energy of -8.58 kcal.mol<sup>-1</sup> in complex 5 and C<sub>4</sub>-H<sub>4</sub>...O<sub>1</sub> alongside C<sub>7</sub>-H<sub>7</sub>...I<sub>1</sub> with the energy of -8.23 kcal.mol<sup>-1</sup> in complex 6 formed dimer2, (figures S17a, S18a). C<sub>9</sub>-H<sub>9</sub>...O<sub>2b</sub> with the energy of -3.13 kcal.mol<sup>-1</sup> in complex 5 and C<sub>9</sub>-H<sub>9</sub>...O<sub>2b</sub> and C<sub>8</sub>-H<sub>8</sub>...C<sub>gpy</sub> with the energy of -3.60 kcal.mol<sup>-1</sup> in complex 6 made dimer4, (figures S17b, S18b). The connection between organic and inorganic parts was formed via two

symmetrical  $C_{15}-H_{15}\cdots Br_2$  interactions (dimer5 with  $-9.10 \text{ kcal.mol}^{-1}$  energy) in the figure S17c. Dimer5 ( $-6.28 \text{ kcal.mol}^{-1}$  energy) for complex 6 which is depicted in figure S18c, is the analogue of dimer5 in complex 5.

**S19. Representation of dimer1 (a), dimer2 (b), dimer4 (c), and dimer7 (d) with calculated binding energy for the dimers in complex 7**

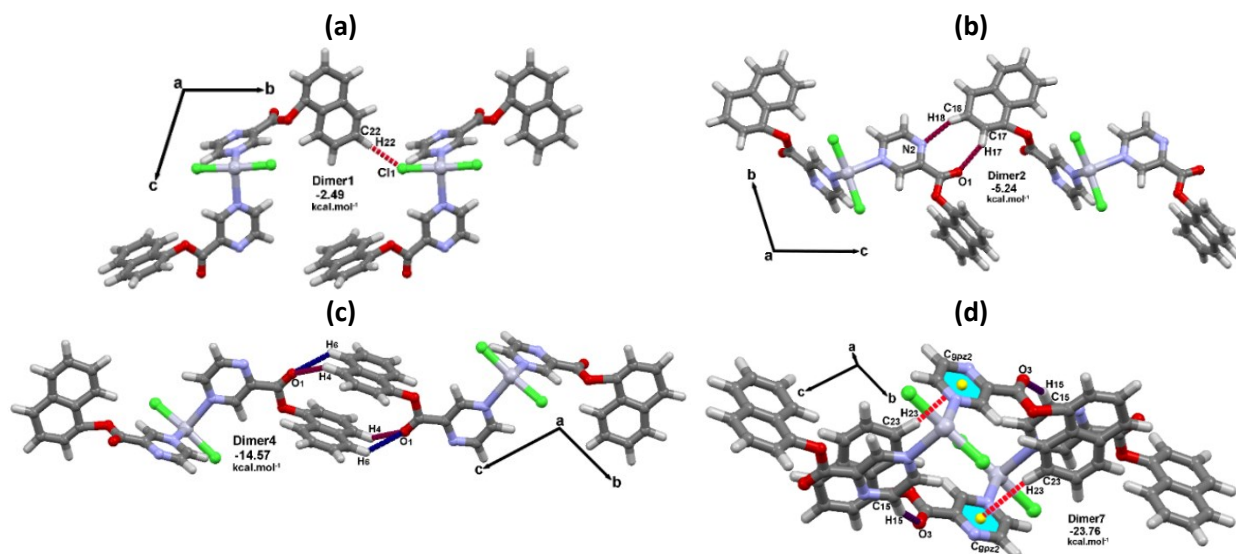

**S20. Representation of dimer1 (a), dimer2 (b), dimer4 (c), and dimer7 (d) with calculated binding energy for the dimers in complex 8**

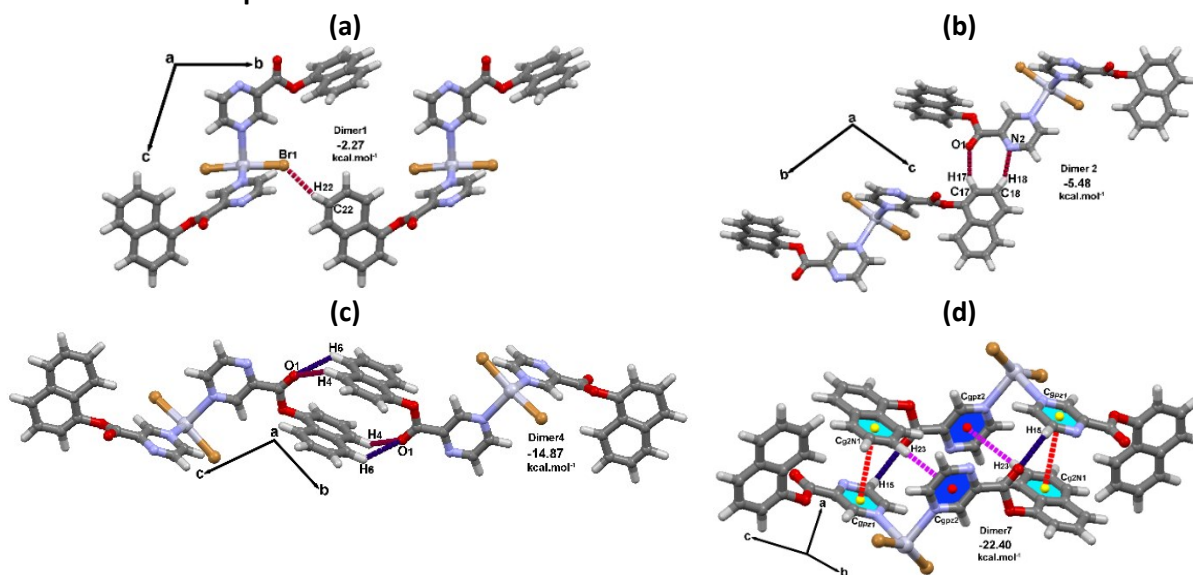

**Complexes 7, 8**

$C_{22}-H_{22}\cdots Cl_1/Br_1$  occurred in complexes 7/8 and made dimer1 with  $-2.49/-2.27 \text{ kcal.mol}^{-1}$  energy, (figures S19a, S20a). Bifurcated interactions of oxygen as an acceptor for both of the complexes

are represented in figures S19c and S20c. The bifurcated interactions constituted dimer4 with the energy of -14.57 and -14.78 kcal.mol<sup>-1</sup>. Since there are not many acceptors in the designed structures, some of the molecules interacted with each other in a bifurcated style. In the dimer7, there were three types of interactions at the plank; 1) C<sub>gPz1</sub>...C<sub>g2N1</sub> or π...π; 2) C<sub>23</sub>-H<sub>23</sub>... C<sub>gPz2</sub> or C-H...π; 3) C<sub>15</sub>-H<sub>15</sub>...O<sub>3</sub>, figures S19d and S20d. The interactions produced a tight dimer with the energy of -23.76 and -22.40 kcal.mol<sup>-1</sup> in order for complexes 7 and 8.

### S21. Representation of dimer1 in complex 9 with calculated binding energy

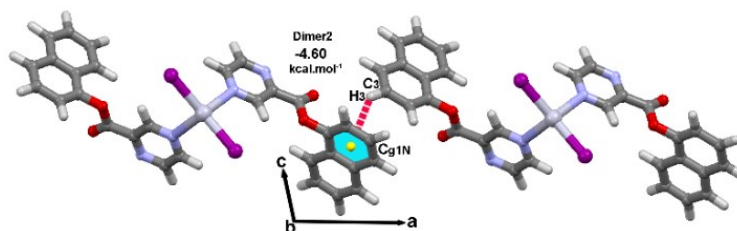

### Complex 9

In figure S21, dimer2 was formed for complex 9 by C-H...π interaction between C<sub>3</sub>-H<sub>3</sub> and C<sub>gR1N</sub> with -4.60 kcal.mol<sup>-1</sup> binding energy.

### S22. Representation of dimer2 (a) and dimer5 (b) with calculated binding energy for the dimers in complex 10

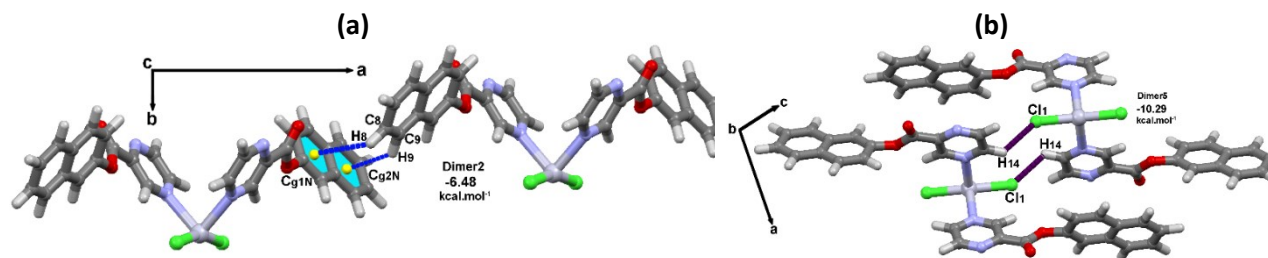

### S23. Representation of dimer2 (a) and dimer5 (b) with calculated binding energy for the dimers in complex 11

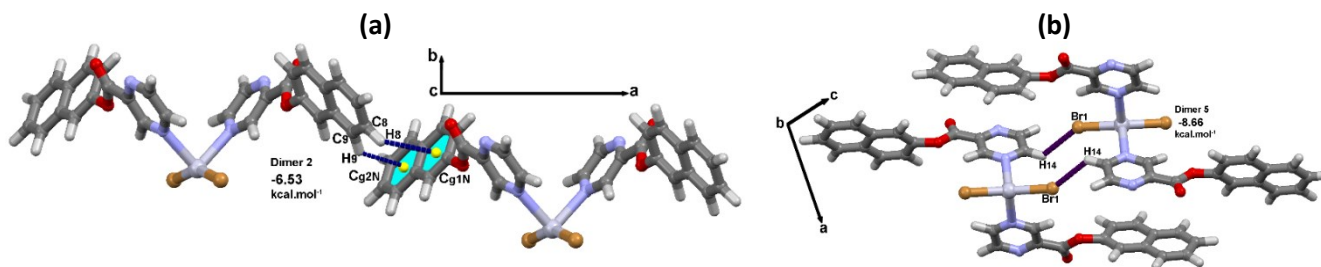

### Complexes 10, 11

Two C-H...π interactions (C<sub>9</sub>-H<sub>9</sub>...C<sub>g2N</sub> and C<sub>8</sub>-H<sub>8</sub>...C<sub>g1N</sub>) between naphthol rings made dimer2 in diametrical style at ab-plane which is presented in figures S22a and S23a for both of the

complexes 10 and 11. The shaped dimers indicated the energy of -6.48 and -6.53 kcal.mol<sup>-1</sup> in order for complexes 10 and 11. C<sub>14</sub>-H<sub>14</sub>...Cl<sub>1</sub>/Br<sub>1</sub> interwove two molecules by 10/1U (1-Over/ 1-Under) fashion in order to elongate the molecules (via dimer5) through c-axis, figures S22b and S23b. The energy of this dimer for the compounds 10 and 11 was -10.29 and -8.66 kcal.mol<sup>-1</sup>, respectively.

#### S24. Dimer binding energy for all of the symmetry operators in complexes 1-11

|                   | Translation (T) | Inversion Center (I) | Screw Axis (S) | Glide Plane (G) | I+S+G  |
|-------------------|-----------------|----------------------|----------------|-----------------|--------|
| <b>Complex 1</b>  | -21.17          | -114.6               | -              | -               | -      |
| <b>Complex 2</b>  | -1.8            | -7.46                | -58.31         | -10.07          | -      |
| <b>Complex 3</b>  | -1.24           | -7.11                | -55.94         | -11.31          | -      |
| <b>Complex 4</b>  | -39.87          | -                    | -              | -               | -16.59 |
| <b>Complex 5</b>  | -12.34          | -18.05               | -8.58          | -               | -      |
| <b>Complex 6</b>  | -11.32          | -10.46               | -14.51         | -               | -      |
| <b>Complex 7</b>  | -7.73           | -128.69              | -              | -               | -      |
| <b>Complex 8</b>  | -7.75           | -129.68              | -              | -               | -      |
| <b>Complex 9</b>  | -               | -                    | -39.95         | -               | -8.35  |
| <b>Complex 10</b> | -               | -                    | -44.38         | -               | -48.47 |
| <b>Complex 11</b> | -               | -                    | -42.85         | -               | -45.52 |

#### S25. References

- [1] Agilent, CrysAlisPro Version 1.171.37.35, Agilent Technologies UK Ltd, Yarnton, England, **2014**.
- [2] Rigaku Mercury 375R/M CCD.Crystal Clear-SM Expert 2.0rc14, Rigaku Corporation, Tokyo, Japan, **2009**.
- [3] G. M. Sheldrick, *Acta Crystallogr., Sect. C: Struct. Chem.*, 2015, **71**, 3–8.
- [4] A. L. Spek, *J. Appl. Crystallogr.*, 2003, **36**, 7–13.
- [5] A. L. Spek, PLATON: A Multipurpose Crystallographic Tool, Utrecht University, Utrecht, Netherlands, **2002**.
- [6] L. J. Farrugia, *J. Appl. Crystallogr.*, 2012, **45**, 849–854.
- [7] S. Grimme, *J. Comput. Chem.*, 2004, **25**, 1463–1473.
- [8] S. Grimme, *J. Comput. Chem.*, 2006, **27**, 1787–1799.
- [9] M. Walker, A. J. A. Harvey, A. Sen and C. E. H. Dessent, *J. Phys. Chem. A*, 2013, **117**, 47, 12590–12600.
- [10] R. Valero, R. Costa, I. de P. R. Moreira, D. G. Truhlar and F. Illas, *J. Chem. Phys.*, 2008, **128**, 114103.
- [11] V. S. Bryantsev, M. S. Diallo, A. C. T. van Duin and W. A. Goddard III, *J. Chem. Theory Comput.*, 2009, **5**, 4, 1016–1026.

[12] D. Benitez, E. Tkatchouk, I. Yoon, J. F. Stoddart and W. A. Goddard III, *J. Am. Chem. Soc.*, 2008, **130**, 45, 14928–14929.

[13] S. Grimme, J. Antony, S. Ehrlich and H. Krieg, *J. Chem. Phys.*, 2010, **132**, 154104.

[14] S. F. Boys and F. D. Bernardi, *Mol. Phys.*, 1970, **19**, 553–566.

[15] M. W. Schmidt, K. K. Baldrige, J. A. Boatz, S. T. Elbert, M. S. Gordon, J. H. Jensen, S. Koseki, N. Matsunaga, K. A. Nguyen, S. Su, T. L. Windus, M. Dupuis and J. A. Montgomery, *J. Comput. Chem.*, 1993, **14**, 1347–1363.

### **S26. Contents of the CSD-Analysis' for the tables S27, S28, 29**

The tables are included eight parts from left to right as each part explained below.

- I) The number of hits.
- II) Ref. Codes for all of the hits.
- III) The number of different mercury halide centers which presents in each hit.
- IV) Polymerization mode which included three groups. First, the molecules which are formed discrete molecules. Second, the molecules which are expanded through anion or TA (including dimer, trimer, tetramer, pentamer, oligomer, and polymer through anion). Third, the molecules which are expanded through ligand or TL (including dimer, trimer, tetramer, pentamer, oligomer, and polymer through anion). It should be noted that these compounds are included the ligands with more than one donor in their structure and they are mostly acted as a linker between metal centers.
- V) Geometry mode which is shown the geometry around metal center and apart from their abundance, it can be classified to 20 modes for mercuric halide (II) in our study as below; Linear, Bent, Trigonal-Planar, Trigonal Pyramid, Tetrahedral, D- Tetrahedral (Seesaw), D- Tetrahedral (Pyramid), Square Planar, Square Pyramid, Trigonal Bipyramid, Pentagonal, T- Shaped, Octahedral, Hexagonal, Pentagonal Pyramid, Trigonal Prismatic, Trigonal Anti-Prismatic, Pentagonal Bipyramid, Hexagonal Bipyramid, and the Distorted (D) forms for any of the mentioned geometries.
- VI) Coordination number (C.N.) which is contained C.N. = 2 to C.N. = 8.



VII) Coordination mode of the ligand which is included being chelates, non-chelate, and independent metal halides. In this column metal to metal bond is also assigned as a part of non-chelate complexes with M-M symbol.

VIII) The donor atom of the ligand is represented in this column and for one mercury center it can be contained at most three donor atoms. The represented donors are N, O, S, C, P, Se. In this column metal (in a few cases non-metal) of mentioned M-M is named, as well. X (Cl, Br, and I) as a linked halide into metal center also represented here for independent metal halide cases.

### S27. CSD-Analysis for HgCl<sub>2</sub> Compounds

| Number | Ref. Code | Hits | Polymerization Mode    | Geometry             | C.N. | Chelation Mode    | Donor Atom of Ligand |         |
|--------|-----------|------|------------------------|----------------------|------|-------------------|----------------------|---------|
| 1      | ARIRUQ    | 1    | Polymer Through Ligand | Seesaw               | 4    | Non-Chelate       | N-Donor              | O-Donor |
| 2      | ARISAX    | 2    | Polymer Through Ligand | Trigonal Bipyramid   | 5    | Non-Chelate       | N-Donor              |         |
|        |           | 3    | Polymer Through Anion  | Trigonal Bipyramid   | 5    | Non-Chelate       | N-Donor              |         |
| 3      | ASABON    | 4    | Discrete Molecule      | T-Shape              | 5    | Chelate           | N-Donor              |         |
| 4      | ASEDIN    | 5    | Polymer Through Ligand | Seesaw               | 4    | Non-Chelate       | O-Donor              |         |
| 5      | AVANIW    | 6    | Discrete Molecule      | D-Octahedral         | 6    | Chelate           | N-Donor              |         |
| 6      | AXAWIH    | 7    | Polymer Through Ligand | Seesaw               | 4    | Non-Chelate       | N-Donor              |         |
| 7      | AXAWON    | 8    | Polymer Through Ligand | Trigonal Bipyramid   | 5    | Non-Chelate       | N-Donor              | O-Donor |
| 8      | EREQEZ    | 9    | Polymer Through Ligand | Seesaw               | 4    | Non-Chelate       | N-Donor              |         |
| 9      | EWUDUX    | 10   | Polymer Through Ligand | Seesaw               | 4    | Non-Chelate       | S-Donor              |         |
| 10     | ISOQEO    | 11   | Dimer Through Anion    | D-Square Pyramid     | 5    | Chelate           | N-Donor              |         |
| 11     | ISOQIS    | 12   | Dimer Through Anion    | D-Square Pyramid     | 5    | Chelate           | N-Donor              |         |
| 12     | ISOQOY    | 13   | Dimer Through Anion    | D-Square Pyramid     | 5    | Chelate           | N-Donor              |         |
| 13     | ISOQUE    | 14   | Dimer Through Anion    | D-Square Pyramid     | 5    | Chelate           | N-Donor              |         |
| 14     | ISORAL    | 15   | Dimer Through Anion    | D-Square Pyramid     | 5    | Chelate           | N-Donor              |         |
| 15     | ISOREP    | 16   | Dimer Through Anion    | D-Square Pyramid     | 5    | Chelate           | N-Donor              |         |
| 16     | ISORIT    | 17   | Discrete Molecule      | Seesaw               | 4    | Chelate           | N-Donor              |         |
| 17     | ISOROZ    | 18   | Dimer Through Anion    | D-Square Pyramid     | 5    | Chelate           | N-Donor              |         |
| 18     | ISORUF    | 19   | Discrete Molecule      | Seesaw               | 4    | Chelate           | N-Donor              |         |
| 19     | ISOSAM    | 20   | Dimer Through Anion    | D-Square Pyramid     | 5    | Chelate           | N-Donor              |         |
| 20     | ISOSEQ    | 21   | Discrete Molecule      | Seesaw               | 4    | Chelate           | N-Donor              |         |
| 21     | ISOSIU    | 22   | Dimer Through Anion    | D-Square Pyramid     | 5    | Chelate           | N-Donor              |         |
| 22     | ISOSOA    | 23   | Dimer Through Anion    | D-Square Pyramid     | 5    | Chelate           | N-Donor              |         |
| 23     | OJULOW    | 24   | Dimer Through Anion    | Seesaw               | 4    | Non-Chelate       | N-Donor              |         |
| 24     | OSOGIO    | 25   | Polymer Through Ligand | Seesaw               | 4    | Non-Chelate       | N-Donor              |         |
| 25     | UTENIS    | 26   | Polymer Through Ligand | Trigonal Bipyramid   | 5    | Non-Chelate       | S-Donor              |         |
|        |           | 27   | Polymer Through Anion  | Tetrahedral          | 4    | Metal Halide Only | Chlorine             |         |
|        |           | 28   | Polymer Through Ligand | D-Tetrahedral (Py)   | 4    | Non-Chelate       | S-Donor              |         |
| 26     | UTENOY    | 29   | Dimer Through Anion    | D-trigonal Bipyramid | 5    | Non-Chelate       | S-Donor              | O-Donor |
| 27     | UWOLID    | 30   | Dimer Through Anion    | Seesaw               | 4    | Non-Chelate       | N-Donor              |         |
| 28     | UXACUT    | 31   | Discrete Molecule      | Tetrahedral          | 4    | Metal Halide Only | Chlorine             |         |
| 29     | ACIWUF    | 32   | Polymer Through Ligand | Seesaw               | 4    | Non-Chelate       | N-Donor              |         |
| 30     | ACIXAM    | 33   | Polymer Through Ligand | D-Octahedral         | 6    | Non-Chelate       | N-Donor              | O-Donor |
| 31     | ACZOZH    | 34   | Polymer Through Ligand | Seesaw               | 4    | Non-Chelate       | N-Donor              |         |
| 32     | ADEJEZ    | 35   | Polymer Through Anion  | Square Pyramid       | 5    | Metal Halide Only | Chlorine             |         |
| 33     | ADNCHG10  | 36   | Polymer Through Anion  | Seesaw               | 4    | Metal Halide Only | Chlorine             |         |
| 34     | ADOJEF    | 37   | Polymer Through Anion  | D-Octahedral         | 6    | Non-Chelate       | N-Donor              |         |
| 35     | ADOJIN    | 38   | Polymer Through Anion  | D-Octahedral         | 6    | Non-Chelate       | N-Donor              |         |
| 36     | ADOJOT    | 39   | Polymer Through Anion  | D-Octahedral         | 6    | Non-Chelate       | N-Donor              |         |
| 37     | ADOJUZ    | 40   | Polymer Through Anion  | D-Octahedral         | 6    | Non-Chelate       | N-Donor              |         |
|        |           | 41   | Polymer Through Anion  | Seesaw               | 4    | Metal Halide Only | Chlorine             |         |
|        |           | 42   | Polymer Through Anion  | D-Octahedral         | 6    | Metal Halide Only | Chlorine             |         |
| 38     | AGERUA    | 43   | Dimer Through Anion    | D-Trigonal Bipyramid | 5    | Chelate           | N-Donor              |         |

|    |          |     |                         |                      |   |                   |                  |
|----|----------|-----|-------------------------|----------------------|---|-------------------|------------------|
| 39 | AGOCEG   | 44  | Tetramer Through Anion  | D-Square Pyramid     | 5 | Metal Halide Only | Chlorine         |
|    |          | 45  | Tetramer Through Anion  | Seesaw               | 4 | Chelate           | N-Donor          |
| 40 | AHOJEM   | 46  | Polymer Through Anion   | Octahedral           | 6 | Metal Halide Only | Chlorine         |
| 41 | AJAJIF   | 47  | Dimer Through Anion     | D-Tetrahedral (Py)   | 4 | Non-Chelate       | Se-Donor         |
| 42 | AKIROB   | 48  | Discrete Molecule       | Seesaw               | 4 | Non-Chelate       | C-Donor          |
| 43 | AKIRUH   | 49  | Tetramer Through Anion  | Seesaw               | 4 | Metal Halide Only | Chlorine         |
|    |          | 50  | Tetramer Through Anion  | Trigonal Bipyramid   | 5 | Metal Halide Only | Chlorine         |
| 44 | AKIRUH01 | 51  | Tetramer Through Anion  | Seesaw               | 4 | Metal Halide Only | Chlorine         |
|    |          | 52  | Tetramer Through Anion  | Trigonal Bipyramid   | 5 | Metal Halide Only | Chlorine         |
| 45 | AKISAO   | 53  | Discrete Molecule       | Seesaw               | 4 | Non-Chelate       | C-Donor          |
| 46 | AKISES   | 54  | Discrete Molecule       | D-Octahedral         | 6 | Non-Chelate       | C-Donor O-Donor  |
| 47 | AKULIB   | 55  | Dimer Through Anion     | D-Tetrahedral (Py)   | 4 | Non-Chelate       | P-Donor          |
| 48 | ALIFOS   | 56  | Polymer Through Ligand  | Trigonal Bipyramid   | 5 | Non-Chelate       | N-Donor          |
| 49 | AMEJUX   | 57  | Discrete Molecule       | Seesaw               | 4 | Chelate           | N-Donor          |
| 50 | AMEJUX01 | 58  | Discrete Molecule       | Seesaw               | 4 | Chelate           | N-Donor          |
| 51 | AMODAH   | 59  | Dimer Through Anion     | D-Octahedral         | 6 | Chelate           | N-Donor          |
| 52 | APEYUR   | 60  | Discrete Molecule       | D-Trigonal Bipyramid | 5 | Chelate           | N-Donor          |
| 53 | AQATAN   | 61  | Polymer Through Ligand  | Seesaw               | 4 | Non-Chelate       | N-Donor          |
|    |          | 62  | Trimer Through Anion    | Tetrahedral          | 4 | Metal Halide Only | Chlorine         |
| 54 | AQAWOG   | 63  | Trimer Through Anion    | Octahedral           | 6 | Metal Halide Only | Chlorine         |
|    |          | 64  | Polymer Through Ligand  | Seesaw               | 4 | Non-Chelate       | N-Donor          |
| 55 | AQEFUJ   | 65  | Polymer Through Ligand  | Seesaw               | 4 | Non-Chelate       | N-Donor          |
| 56 | AQEFUZ   | 65  | Polymer Through Ligand  | Seesaw               | 4 | Non-Chelate       | N-Donor          |
| 57 | AQEGIO   | 66  | Polymer Through Ligand  | Seesaw               | 4 | Non-Chelate       | N-Donor          |
| 58 | AQEHAA   | 67  | Polymer Through Ligand  | Seesaw               | 4 | Non-Chelate       | N-Donor          |
| 59 | ARUJEC   | 68  | Oligomer Through Anion  | Trigonal             | 3 | Non-Chelate       | P-Donor          |
|    |          | 69  | Oligomer Through Anion  | Tetrahedral          | 4 | Metal Halide Only | Chlorine         |
|    |          | 70  | Oligomer Through Anion  | Seesaw               | 4 | Non-Chelate       | P-Donor          |
| 60 | ARUJIG   | 71  | Oligomer Through Anion  | Trigonal             | 3 | Non-Chelate       | P-Donor          |
|    |          | 72  | Oligomer Through Anion  | Tetrahedral          | 4 | Metal Halide Only | Chlorine         |
|    |          | 73  | Oligomer Through Anion  | Seesaw               | 4 | Non-Chelate       | P-Donor          |
|    |          | 74  | Oligomer Through Anion  | Trigonal Pyramid     | 4 | Non-Chelate       | P-Donor          |
| 61 | ASOKIC   | 75  | Dimer Through Ligand    | Seesaw               | 4 | Non-Chelate       | N-donor          |
| 62 | ASUKII   | 76  | Dimer Through Anion     | Tetrahedral          | 4 | Metal Halide Only | Chlorine         |
| 63 | AVISII   | 77  | Discrete Molecule       | Tetrahedral          | 4 | Metal Halide Only | Chlorine         |
| 64 | AWOKAZ   | 78  | Polymer through ligand  | Seesaw               | 4 | Non-Chelate       | N-donor          |
| 65 | AXUDON   | 79  | Tetramer Through Anion  | Seesaw               | 4 | Non-Chelate       | O-donor          |
|    |          | 80  | Tetramer Through Anion  | Trigonal             | 3 | Non-Chelate       | C-donor Chlorine |
| 66 | AYIMUR   | 81  | Dimer Through Anion     | D-Square Pyramid     | 5 | Chelate           | N-donor          |
| 67 | AZCDHG   | 82  | Discrete Molecule       | Tetrahedral          | 4 | Metal Halide Only | Chlorine         |
| 68 | AZOBIB   | 83  | Polymer Through Anion   | Seesaw               | 4 | Non-Chelate       | N-Donor          |
| 69 | BABLOH   | 84  | Oligomer Through Ligand | D-Octahedral         | 6 | Non-Chelate       | N-Donor          |
|    |          | 85  | Oligomer Through Ligand | Trigonal Bipyramid   | 5 | Non-Chelate       | N-Donor          |
|    |          | 86  | Oligomer Through Ligand | Seesaw               | 4 | Non-Chelate       | N-Donor          |
|    |          | 87  | Oligomer Through Ligand | Trigonal             | 3 | Non-Chelate       | N-Donor          |
|    |          | 88  | Polymer Through Anion   | D-Octahedral         | 6 | Non-Chelate       | N-Donor          |
|    |          | 89  | Polymer Through Anion   | Trigonal Bipyramid   | 5 | Non-Chelate       | N-Donor          |
| 70 | BABLUN   | 90  | Polymer through ligand  | Seesaw               | 4 | Non-Chelate       | N-Donor          |
| 71 | BABNAU   | 91  | Dimer Through Anion     | Seesaw               | 4 | Non-Chelate       | O-Donor          |
|    |          | 92  | Discrete Molecule       | Trigonal             | 3 | Non-Chelate       | O-Donor          |
| 72 | BABRED   | 93  | Polymer Through Ligand  | Seesaw               | 4 | Non-Chelate       | O-Donor N-Donor  |
| 73 | BABZUZ   | 94  | Polymer Through Anion   | D-Octahedral         | 6 | Non-Chelate       | N-Donor          |
| 74 | BACZUB   | 95  | Dimer Through Anion     | Tetrahedral          | 4 | Metal Halide Only | Chlorine         |
| 75 | BAKMEH   | 96  | Dimer Through Anion     | D-Tetrahedral (Py)   | 4 | Non-Chelate       | C-Donor          |
| 76 | BAPWAQ   | 97  | Discrete Molecule       | Seesaw               | 4 | Non-Chelate       | S-Donor          |
| 77 | BAPWEU   | 98  | Polymer Through Anion   | D-Tetrahedral (Py)   | 4 | Non-Chelate       | S-Donor          |
| 78 | BARGUW   | 99  | Tetramer Through Ligand | Seesaw               | 4 | Non-Chelate       | S-Donor          |
|    |          | 100 | Tetramer Through Ligand | Seesaw               | 4 | Metal Halide Only | Chlorine         |
| 79 | BARYOJ   | 101 | Polymer Through Anion   | Square Planar        | 4 | Non-Chelate       | N-Donor          |
| 80 | BASJIP   | 102 | Polymer Through Ligand  | Seesaw               | 4 | Non-Chelate       | N-Donor          |
| 81 | BASJOV   | 103 | Polymer Through Ligand  | Seesaw               | 4 | Non-Chelate       | N-Donor          |
| 82 | BAVKIS   | 104 | Polymer Through Anion   | Square Planar        | 4 | Metal Halide Only | Chlorine         |
|    |          | 105 | Polymer Through Anion   | Seesaw               | 4 | Non-Chelate       | S-Donor          |
| 83 | BEGREK   | 106 | Tetramer Through Anion  | Seesaw               | 4 | Non-Chelate       | Se-Donor N-Donor |

|     |          |     |                        |                    |   |                   |                  |
|-----|----------|-----|------------------------|--------------------|---|-------------------|------------------|
|     |          | 107 | Tetramer Through Anion | Seesaw             | 4 | Non-Chelate       | Se-Donor         |
| 84  | BEGZIW   | 108 | Discrete Molecule      | Tetrahedral        | 4 | Metal Halide Only | Chlorine         |
| 85  | BEHLUV   | 109 | Polymer Through Anion  | Trigonal bipyramid | 5 | Non-Chelate       | S-Donor          |
| 86  | BEMTOC   | 110 | Polymer Through Anion  | D-Octahedral       | 6 | Metal Halide Only | Chlorine         |
| 87  | BENGIM   | 111 | Polymer Through Anion  | D-Tetrahedral (Py) | 4 | Non-Chelate       | C-Donor          |
| 88  | BEQNAM   | 112 | Discrete Molecule      | Seesaw             | 4 | Non-Chelate       | O-Donor          |
| 89  | BESNET   | 113 | Polymer Through Ligand | Seesaw             | 4 | Non-Chelate       | N-Donor          |
| 90  | BETPAR   | 114 | Dimer Through Anion    | Tetrahedral        | 4 | Metal Halide Only | Chlorine         |
| 91  | BEVCUC   | 115 | Dimer Through Anion    | D-Square Pyramid   | 5 | Chelate           | N-Donor          |
| 92  | BEVDAJ   | 116 | Discrete Molecule      | T-Shape            | 5 | Chelate           | N-Donor O-Donor  |
| 93  | BEVDEN   | 117 | Dimer through anion    | D-Square Pyramid   | 5 | Chelate           | N-Donor          |
| 94  | BEVDIR   | 118 | Dimer Through Anion    | D-Square Pyramid   | 5 | Chelate           | N-Donor          |
| 95  | BEVDOX   | 119 | Dimer Through Anion    | D-Square Pyramid   | 5 | Chelate           | N-Donor          |
| 96  | BIFHOO   | 120 | Dimer Through Anion    | Seesaw             | 4 | Non-Chelate       | Iodine           |
| 97  | BIHZEZ   | 121 | Polymer Through Anion  | D-Square Pyramid   | 5 | Chelate           | N-Donor O-Donor  |
| 98  | BIHZID   | 122 | Polymer through anion  | D-Octahedral       | 6 | Chelate           | N-Donor O-Donor  |
| 99  | BIMJAI   | 123 | Discrete Molecule      | Tetrahedral        | 4 | Metal Halide Only | Chlorine         |
| 100 | BITGOA10 | 124 | Discrete Molecule      | Tetrahedral        | 4 | Metal Halide Only | Chlorine         |
| 101 | BITHAN10 | 125 | Polymer Through Anion  | Seesaw             | 4 | Metal Halide Only | Chlorine         |
|     |          | 126 | Polymer Through Anion  | Octahedral         | 4 | Metal Halide Only | Chlorine         |
| 102 | BITHER10 | 127 | Discrete Molecule      | Tetrahedral        | 4 | Metal Halide Only | Chlorine         |
| 103 | BITHIV10 | 128 | Polymer Through Anion  | Seesaw             | 4 | Metal Halide Only | Chlorine         |
|     |          | 129 | Polymer Through Anion  | Octahedral         | 6 | Metal Halide Only | Chlorine         |
| 104 | BITHIV11 | 130 | Polymer Through Anion  | Seesaw             | 4 | Metal Halide Only | Chlorine         |
|     |          | 131 | Polymer Through Anion  | Octahedral         | 6 | Metal Halide Only | Chlorine         |
| 105 | BIXCIU   | 132 | Dimer Through Anion    | D-Tetrahedral (Py) | 4 | Non-Chelate       | P-Donor          |
| 106 | BIZVIQ   | 133 | Polymer Through Anion  | D-Tetrahedral (Py) | 4 | Non-Chelate       | S-Donor          |
| 107 | BOCDIG   | 134 | Dimer Through Anion    | Tetrahedral        | 4 | Metal Halide Only | Chlorine         |
| 108 | BOCDIG10 | 135 | Dimer Through Anion    | Tetrahedral        | 4 | Metal Halide Only | Chlorine         |
| 109 | BOCPOA   | 136 | Polymer Through Ligand | Seesaw             | 4 | Non-Chelate       | N-Donor          |
| 110 | BOCXIC   | 137 | Discrete Molecule      | Seesaw             | 4 | Chelate           | N-Donor          |
| 111 | BOPXIN   | 138 | Polymer Through Anion  | Trigonal Pyramid   | 4 | Metal Halide Only | Chlorine         |
| 112 | BOPXIN01 | 139 | Polymer Through Anion  | Trigonal Pyramid   | 4 | Metal Halide Only | Chlorine         |
| 113 | BOQTIL   | 140 | Discrete Molecule      | D-Tetrahedral (Py) | 4 | Non-Chelate       | P-Donor          |
| 114 | BOQTOR   | 141 | Discrete Molecule      | Seesaw             | 4 | Non-Chelate       | P-Donor Bromine  |
| 115 | BOTYEQ   | 142 | Discrete Molecule      | T-Shape            | 5 | Chelate           | N-Donor          |
| 116 | BOVNEG   | 143 | Discrete Molecule      | Seesaw             | 4 | Non-Chelate       | N-Donor          |
| 117 | BSHGCL   | 144 | Polymer Through Anion  | Seesaw             | 4 | Non-Chelate       | O-Donor          |
| 118 | BTCHGP   | 145 | Tetramer Through Anion | Seesaw             | 4 | Non-Chelate       | S-Donor          |
|     |          | 146 | Tetramer Through Anion | Seesaw             | 4 | Metal Halide Only | Chlorine         |
| 119 | BULSOQ   | 147 | Dimer Through Anion    | D-Tetrahedral (Py) | 4 | Non-Chelate       | P-Donor          |
| 120 | BULSOQ01 | 148 | Dimer Through Anion    | D-Tetrahedral (Py) | 4 | Non-Chelate       | P-Donor          |
| 121 | BULZAJ   | 149 | Discrete Molecule      | Seesaw             | 4 | Non-Chelate       | P-Donor          |
| 122 | BULZAJ01 | 150 | Discrete Molecule      | Seesaw             | 4 | Non-Chelate       | P-Donor          |
| 123 | BULZAJ02 | 151 | Discrete Molecule      | Seesaw             | 4 | Non-Chelate       | P-Donor          |
| 124 | BUPSUA   | 152 | Dimer Through Anion    | Tetrahedral        | 4 | Metal Halide Only | Chlorine         |
|     |          | 153 | Dimer Through Anion    | D-Octahedral       | 6 | Chelate           | N-Donor          |
| 125 | BUPXAL01 | 154 | Discrete Molecule      | Tetrahedral        | 4 | Metal Halide Only | Chlorine         |
| 126 | BURHGC   | 155 | Discrete Molecule      | Square Planar      | 4 | Non-Chelate       | O-Donor          |
| 127 | BURVAN   | 156 | Dimer Through Ligand   | Seesaw             | 4 | Non-Chelate       | N-Donor          |
| 128 | BUTYUM   | 157 | Polymer Through Ligand | D-Square Pyramid   | 5 | Non-Chelate       | N-Donor          |
|     |          | 158 | Polymer Through Anion  | D-Square Pyramid   | 5 | Non-Chelate       | N-Donor          |
| 129 | BUVPAL   | 159 | Dimer Through Anion    | Tetrahedral        | 4 | Metal Halide Only | Chlorine         |
| 130 | BZACHG   | 160 | Polymer Through Anion  | Square Planar      | 4 | Metal Halide Only | Chlorine         |
|     |          | 161 | Polymer Through Anion  | Seesaw             | 4 | Metal Halide Only | Chlorine         |
| 131 | BZCRHG   | 162 | Polymer Through Anion  | D-Prism            | 6 | Non-Chelate M-M   | C-Donor Chromium |
|     |          | 163 | Polymer Through Anion  | Seesaw             | 4 | Metal Halide Only | Chlorine         |
| 132 | BZPIHG   | 164 | Polymer Through Anion  | D-Tetrahedral (Py) | 4 | Non-Chelate       | N-Donor          |
|     |          | 165 | Polymer Through Anion  | D-Square Pyramid   | 5 | Metal Halide Only | Chlorine         |
| 133 | CAJPAF   | 166 | Discrete Molecule      | D-Prism            | 6 | Non-Chelate       | C-Donor          |
| 134 | CAJPEJ   | 167 | Discrete Molecule      | D-Prism            | 6 | Non-Chelate       | C-Donor          |
| 135 | CAJPIN   | 168 | Discrete Molecule      | D-Prism            | 6 | Non-Chelate       | C-Donor          |
| 136 | CAJPOT   | 169 | Discrete Molecule      | D-Prism            | 6 | Non-Chelate       | C-Donor          |

|     |          |     |                        |                      |   |                   |          |         |            |
|-----|----------|-----|------------------------|----------------------|---|-------------------|----------|---------|------------|
| 137 | CAJPOT01 | 170 | Discrete Molecule      | D-Prism              | 6 | Non-Chelate       | C-Donor  |         |            |
| 138 | CAJPUZ   | 171 | Discrete Molecule      | D-Prism              | 6 | Non-Chelate       | C-Donor  |         |            |
| 139 | CALPAG   | 172 | Dimer Through Ligand   | Seesaw               | 4 | Non-Chelate       | O-Donor  |         |            |
| 140 | CAVJEO   | 173 | Discrete Molecule      | Tetrahedral          | 4 | Metal Halide Only | Chlorine |         |            |
| 141 | CAVMUH   | 174 | Discrete Molecule      | Seesaw               | 4 | Metal to Metal    | Rhodium  |         |            |
| 142 | CAYBOT   | 175 | Discrete Molecule      | Seesaw               | 4 | Chelate           | P-Donor  |         |            |
| 143 | CAYLOD   | 176 | Dimer Through Anion    | Seesaw               | 4 | Non-Chelate       | N-Donor  |         |            |
| 144 | CECSIN   | 177 | Polymer Through Anion  | D-Tetrahedral (Py)   | 4 | Non-Chelate       | S-Donor  |         |            |
| 145 | CEDYOB   | 178 | Discrete Molecule      | D-Trigonal Bipyramid | 5 | Chelate           | N-Donor  |         |            |
| 146 | CEFLEG   | 179 | Dimer Through Anion    | D-Trigonal Bipyramid | 5 | Chelate           | N-Donor  |         |            |
| 147 | CEFLOQ   | 180 | Dimer Through Anion    | Seesaw               | 4 | Non-Chelate       | N-Donor  |         |            |
| 148 | CEGMOQ   | 181 | Polymer Through Anion  | Seesaw               | 4 | Metal Halide Only | Chlorine |         |            |
|     |          | 182 | Polymer Through Anion  | Octahedral           | 6 | Metal Halide Only | Chlorine |         |            |
| 149 | CEGMUW   | 183 | Discrete Molecule      | Tetrahedral          | 4 | Metal Halide Only | Chlorine |         |            |
| 150 | CEGMUW01 | 184 | Discrete Molecule      | Tetrahedral          | 4 | Metal Halide Only | Chlorine |         |            |
| 151 | CEGMUW02 | 185 | Discrete Molecule      | Tetrahedral          | 4 | Metal Halide Only | Chlorine |         |            |
| 152 | CEGMUW03 | 186 | Discrete Molecule      | Tetrahedral          | 4 | Metal Halide Only | Chlorine |         |            |
| 153 | CEGNAD   | 187 | Polymer Through Anion  | Trigonal Bipyramid   | 5 | Metal Halide Only | Chlorine |         |            |
|     |          | 188 | Polymer Through Anion  | Seesaw               | 4 | Metal Halide Only | Chlorine |         |            |
| 154 | CEJXEV   | 189 | Polymer Through Ligand | Seesaw               | 4 | Non-Chelate       | N-Donor  |         |            |
| 155 | CEKHUX   | 190 | Discrete Molecule      | Square Planar        | 4 | Non-Chelate       | N-Donor  |         |            |
| 156 | CEKJOT   | 191 | Discrete Molecule      | Square Planar        | 4 | Non-Chelate       | N-Donor  |         |            |
|     |          | 192 | Discrete Molecule      | Square Pyramid       | 5 | Non-Chelate       | O-Donor  |         |            |
| 157 | CENWEX   | 193 | Discrete Molecule      | Tetrahedral          | 4 | Metal Halide Only | Chlorine |         |            |
| 158 | CERWIG   | 194 | Discrete Molecule      | Seesaw               | 4 | Non-Chelate       | Se-Donor |         |            |
| 159 | CESLAN   | 195 | Discrete Molecule      | Seesaw               | 4 | Non-Chelate       | M-M      | N-Donor | Iron       |
| 160 | CESZOP   | 196 | Discrete Molecule      | Hexagonal Bipyramid  | 8 | Non-Chelate       | O-Donor  |         |            |
| 161 | CETCHG01 | 197 | Polymer Through Anion  | D-Trigonal Bipyramid | 5 | Non-Chelate       | S-Donor  |         |            |
|     |          | 198 | Polymer Through Anion  | Seesaw               | 4 | Non-Chelate       | S-Donor  |         |            |
| 162 | CETYAC   | 199 | Discrete Molecule      | T-Shape              | 5 | Chelate           | N-Donor  |         |            |
| 163 | CHEXHG   | 200 | Discrete Molecule      | Linear               | 2 | Metal Halide Only | Chlorine |         |            |
| 164 | CHGIRP   | 201 | Discrete Molecule      | Linear               | 2 | Metal to Metal    | Iridium  |         |            |
| 165 | CHGMPP   | 202 | Dimer Through Anion    | Seesaw               | 4 | Metal Halide Only | Chlorine |         |            |
|     |          | 203 | Dimer Through Anion    | Square Planar        | 4 | Non-Chelate       | P-Donor  |         |            |
| 166 | CICZAQ   | 204 | Polymer Through Anion  | D-Octahedral         | 6 | Non-Chelate       | N-Donor  |         |            |
| 167 | CIDFAW   | 205 | Polymer Through Anion  | Seesaw               | 4 | Non-Chelate       | S-Donor  |         |            |
|     |          | 206 | Polymer Through Anion  | Seesaw               | 4 | Non-Chelate       | S-Donor  |         |            |
| 168 | CIDFAW02 | 207 | Polymer Through Anion  | Seesaw               | 4 | Non-Chelate       | S-Donor  |         |            |
|     |          | 208 | Polymer Through Anion  | seesaw               | 4 | Non-Chelate       | S-Donor  |         |            |
| 169 | CIDLOS   | 209 | Polymer Through Anion  | D-Octahedral         | 6 | Non-Chelate       | N-Donor  |         |            |
| 170 | CIDMEJ   | 210 | Dimer Through Anion    | Seesaw               | 4 | Non-Chelate       | N-Donor  |         |            |
| 171 | CIDMUZ   | 211 | Polymer Through Anion  | D-Octahedral         | 6 | Non-Chelate       | N-Donor  |         |            |
| 172 | CIDZUL   | 212 | Dimer Through Anion    | Trigonal             | 3 | Non-Chelate       | C-Donor  |         |            |
| 173 | CINVOL   | 213 | Discrete Molecule      | Seesaw               | 4 | Chelate           | N-Donor  |         |            |
| 174 | CITBUD   | 214 | Discrete Molecule      | Tetrahedral          | 4 | Metal Halide Only | Chlorine |         |            |
| 175 | CITNAW   | 215 | Polymer Through Ligand | Seesaw               | 4 | Non-Chelate       | N-Donor  |         |            |
| 176 | CIZNOO   | 216 | Polymer Through Anion  | D-Tetrahedral (Py)   | 4 | Non-Chelate       | P-Donor  |         |            |
| 177 | CLBHGC   | 217 | Dimer Through Anion    | D-Tetrahedral (Py)   | 4 | Non-Chelate       | P-Donor  |         |            |
| 178 | CLGUHG   | 218 | Polymer Through Anion  | D-Tetrahedral (Py)   | 4 | Non-Chelate       | N-Donor  |         |            |
| 179 | CLNCHG   | 219 | Polymer Through Ligand | Seesaw               | 4 | Non-Chelate       | N-Donor  |         |            |
| 180 | CLTCHG10 | 220 | Discrete Molecule      | Seesaw               | 4 | Non-Chelate       | S-Donor  |         |            |
| 181 | CLTEHG   | 221 | Discrete Molecule      | Seesaw               | 4 | Non-Chelate       | P-Donor  |         |            |
| 182 | CMCPHG10 | 222 | Discrete Molecule      | Seesaw               | 4 | Non-Chelate       | S-Donor  |         |            |
| 183 | CMPRTM   | 223 | Dimer Through Anion    | D-Tetrahedral (Py)   | 4 | Non-Chelate       | S-Donor  |         |            |
| 184 | CMSMOM   | 224 | Tetramer Through Anion | D-Prism              | 6 | Non-Chelate       | M-M      | C-Donor | Molybdenum |
|     |          | 225 | Tetramer Through Anion | Tetrahedral          | 4 | Metal Halide Only | Chlorine |         |            |
| 185 | CNONHG   | 226 | Polymer Through Anion  | D-Square Pyramid     | 5 | Non-Chelate       | O-Donor  |         |            |
|     |          | 227 | Polymer Through Anion  | Square Planar        | 4 | Non-Chelate       | O-Donor  |         |            |
| 186 | COCBUR   | 228 | Dimer Through Anion    | Tetrahedral          | 4 | Metal Halide Only | Chlorine |         |            |
| 187 | COCGAC   | 229 | Discrete Molecule      | Hexagonal Bipyramid  | 8 | Non-Chelate       | O-Donor  |         |            |
| 188 | COCNOY   | 230 | Discrete Molecule      | Tetrahedral          | 4 | Metal Halide Only | Chlorine |         |            |
| 189 | CODYOJ01 | 231 | Dimer Through Ligand   | Seesaw               | 4 | Non-Chelate       | O-Donor  | N-Donor |            |

|     |          |     |                        |                      |   |                   |     |           |           |
|-----|----------|-----|------------------------|----------------------|---|-------------------|-----|-----------|-----------|
| 190 | COEZIH   | 232 | Dimer Through Ligand   | Seesaw               | 4 | Chelate           | M-M | N-Donor   | Iridium   |
| 191 | COLYOS   | 233 | Discrete Molecule      | Seesaw               | 4 | Metal Halide Only |     | Chlorine  |           |
| 192 | CONZEL   | 234 | Discrete Molecule      | Seesaw               | 4 | Non-Chelate       |     | P-Donor   |           |
| 193 | CORKUQ   | 235 | Discrete Molecule      | Seesaw               | 4 | Metal Halide Only |     | Chlorine  |           |
| 194 | COYRAK   | 236 | Discrete Molecule      | T-Shape              | 5 | Chelate           |     | N-Donor   | O-Donor   |
| 195 | COYWIX   | 237 | Dimer Through Ligand   | Seesaw               | 4 | Non-Chelate       |     | N-Donor   |           |
| 196 | COZMAF   | 238 | Discrete Molecule      | D-Square Planar      | 4 | Non-Chelate       | M-M | C-Donor   | Iron      |
| 197 | COZMAF10 | 239 | Discrete Molecule      | D-Square Planar      | 4 | Non-Chelate       | M-M | C-Donor   | Iron      |
| 198 | CPCOHG10 | 240 | Dimer Through Anion    | Square Pyramid       | 4 | Metal to Metal    |     | Cobalt    |           |
| 199 | CPCOMC   | 241 | Polymer Through Anion  | Seesaw               | 4 | Metal Halide Only |     | Chlorine  |           |
|     |          | 242 | Polymer Through Anion  | D-Tetrahedral (Py)   | 4 | Non-Chelate       |     | O-Donor   | C-Donor   |
|     |          | 243 | Polymer Through Anion  | Trigonal             | 3 | Metal Halide Only |     | Chlorine  |           |
|     |          | 244 | Polymer Through Anion  | Tetrahedral          | 4 | Metal Halide Only |     | Chlorine  |           |
| 200 | CPEAHG   | 245 | Discrete Molecule      | Seesaw               | 4 | Chelate           |     | P-Donor   | N-Donor   |
| 201 | CTSCHG   | 246 | Discrete Molecule      | Seesaw               | 4 | Non-Chelate       |     | S-Donor   |           |
| 202 | CUFCEL10 | 247 | Oligomer Through Anion | Trigonal             | 3 | Non-Chelate       |     | C-Donor   |           |
| 203 | CUHMUP   | 248 | Discrete Molecule      | Seesaw               | 4 | Chelate           | M-M | S-Donor   | Tellurium |
| 204 | CUMGEW   | 249 | Discrete Molecule      | Tetrahedral          | 4 | Metal Halide Only |     | Chlorine  |           |
| 205 | CUMGIA   | 250 | Discrete Molecule      | Tetrahedral          | 4 | Metal Halide Only |     | Chlorine  |           |
| 206 | CUPXUH   | 251 | Polymer Through Anion  | Seesaw               | 4 | Metal Halide Only |     | Chlorine  |           |
|     |          | 252 | Polymer Through Anion  | Trigonal             | 3 | Metal Halide Only |     | Chlorine  |           |
|     |          | 253 | Polymer Through Anion  | Trigonal Bipyramid   | 5 | Metal Halide Only |     | Chlorine  |           |
| 207 | CURJAC   | 254 | Discrete Molecule      | Seesaw               | 4 | Metal to Metal    |     | Palladium |           |
| 208 | CUSBEY   | 255 | Trimer Through Anion   | Square Planar        | 4 | Metal Halide Only |     | Chlorine  |           |
|     |          | 256 | Trimer Through Anion   | T-Shape              | 5 | Chelate           |     | N-Donor   |           |
| 209 | CUSRAK   | 257 | Polymer Through Anion  | Seesaw               | 4 | Non-Chelate       |     | N-Donor   |           |
| 210 | CUSSEP   | 258 | Polymer Through Anion  | Seesaw               | 4 | Non-Chelate       |     | N-Donor   |           |
| 211 | CUTDIE   | 259 | Dimer Through Anion    | D-Tetrahedral (Py)   | 4 | Non-Chelate       |     | S-Donor   |           |
| 212 | CUTMAG   | 260 | Polymer Through Ligand | D-Trigonal Bipyramid | 5 | Chelate           |     | O-Donor   | N-Donor   |
| 213 | CUYDUW   | 261 | Discrete Molecule      | Square Planar        | 4 | Non-Chelate       |     | O-Donor   |           |
| 214 | CUYHAG   | 262 | Discrete Molecule      | Trigonal Pyramid     | 4 | Non-Chelate       |     | S-Donor   |           |
| 215 | DABPEB   | 263 | Tetramer Through Anion | Seesaw               | 4 | Non-Chelate       |     | P-Donor   |           |
| 216 | DAGBIX   | 264 | Discrete molecule      | Seesaw               | 4 | Chelate           |     | N-Donor   |           |
| 217 | DAGHIC   | 265 | Polymer Through Anion  | D-Octahedral         | 6 | Chelate           |     | N-Donor   |           |
|     |          | 266 | Polymer Through Anion  | Linear               | 2 | Metal Halide Only |     | Chlorine  |           |
|     |          | 267 | Discrete Molecule      | Tetrahedral          | 4 | Metal Halide Only |     | Chlorine  |           |
| 218 | DAVYU10  | 268 | Polymer Through Anion  | Octahedral           | 6 | Metal Halide Only |     | Chlorine  |           |
| 219 | DAXNOH   | 269 | Polymer Through Anion  | D-Tetrahedral (Py)   | 4 | Non-Chelate       |     | S-Donor   |           |
|     |          | 270 | Polymer Through Ligand | D-Tetrahedral (Py)   | 4 | Non-Chelate       |     | S-Donor   |           |
| 220 | DAXPOJ   | 271 | Polymer Through Anion  | Square Pyramid       | 5 | Non-Chelate       |     | S-Donor   |           |
|     |          | 272 | Polymer Through Ligand | Square Pyramid       | 5 | Non-Chelate       |     | S-Donor   |           |
| 221 | DAYBAH   | 273 | Discrete Molecule      | Seesaw               | 4 | Chelate           |     | N-Donor   |           |
| 222 | DAYJUK   | 274 | Dimer Through Ligand   | Seesaw               | 4 | Non-Chelate       |     | N-Donor   |           |
| 223 | DEBWAJ   | 275 | Dimer Through Ligand   | T-Shape              | 5 | Non-Chelate       |     | O-Donor   |           |
| 224 | DEBWEN   | 276 | Discrete Molecule      | T-Shape              | 6 | Non-Chelate       |     | O-Donor   |           |
| 225 | DEKYIB   | 277 | Discrete Molecule      | Trigonal             | 3 | Non-Chelate       |     | O-Donor   |           |
| 226 | DEPHIQ   | 278 | Polymer Through Ligand | Seesaw               | 4 | Non-Chelate       |     | N-Donor   |           |
| 227 | DEPVOK   | 279 | Polymer Through Anion  | Seesaw               | 4 | Non-Chelate       |     | C-Donor   |           |
| 228 | DEXJOH   | 280 | Polymer Through Anion  | Seesaw               | 4 | Non-Chelate       |     | N-Donor   |           |
| 229 | DEYMUP   | 281 | Dimer Through Anion    | Tetrahedral          | 4 | Metal Halide Only |     | Chlorine  |           |
| 230 | DHURHG   | 282 | Discrete Molecule      | Linear               | 2 | Metal Halide Only |     | Chlorine  |           |
| 231 | DICMAE   | 283 | Dimer Through Anion    | Square Pyramid       | 5 | Non-Chelate       |     | S-Donor   |           |
| 232 | DIFPEN   | 284 | Discrete Molecule      | D-Square Pyramid     | 5 | Chelate           |     | S-Donor   | O-Donor   |
| 233 | DIQPUQ   | 285 | Polymer Through Anion  | Seesaw               | 4 | Metal Halide Only |     | Bromine   |           |
| 234 | DIQQAX   | 286 | Dimer Through Anion    | Tetrahedral          | 4 | Metal Halide Only |     | Chlorine  |           |
| 235 | DIVJAT   | 287 | Discrete Molecule      | Seesaw               | 4 | Metal to Metal    |     | Tellurium |           |
| 236 | DIXNUU   | 288 | Discrete Molecule      | T-Shape              | 5 | Chelate           |     | N-Donor   |           |
| 237 | DIXPAD   | 289 | Discrete Molecule      | T-Shape              | 5 | Chelate           |     | N-Donor   | O-Donor   |
| 238 | DIXPIL   | 290 | Polymer Through Anion  | Square Pyramid       | 5 | Chelate           |     | N-Donor   |           |
| 239 | DIZSIP   | 291 | Dimer Through Ligand   | Seesaw               | 4 | Chelate           |     | N-Donor   |           |
| 240 | DMSOMC   | 292 | Dimer Through Ligand   | Seesaw               | 4 | Non-Chelate       |     | O-Donor   |           |
|     |          | 293 | Polymer Through Anion  | T-Shape              | 3 | Metal Halide Only |     | Chlorine  |           |
| 241 | DOBCAZ   | 294 | Polymer Through Anion  | Seesaw               | 4 | Metal Halide Only |     | Chlorine  |           |

|     |          |     |                        |                      |   |                   |                 |
|-----|----------|-----|------------------------|----------------------|---|-------------------|-----------------|
|     |          | 295 | Polymer Through Anion  | Octahedral           | 6 | Metal Halide Only | Chlorine        |
|     |          | 296 | Polymer Through Anion  | Trigonal             | 3 | Metal Halide Only | Chlorine        |
| 242 | DOBCIH   | 297 | Polymer Through Anion  | Seesaw               | 4 | Metal Halide Only | Chlorine        |
|     |          | 298 | Polymer Through Anion  | Trigonal             | 3 | Metal Halide Only | Chlorine        |
| 243 | DOBDOO   | 299 | Polymer Through Anion  | Tetrahedral          | 4 | Metal Halide Only | Chlorine        |
|     |          | 300 | Polymer Through Anion  | Square Pyramid       | 5 | Metal Halide Only | Chlorine        |
| 244 | DOPJAT   | 301 | Discrete Molecule      | Seesaw               | 4 | Non-Chelate       | P-Donor         |
| 245 | DORSEI   | 302 | Polymer Through Anion  | Square Planar        | 4 | Metal Halide Only | Chlorine        |
|     |          | 303 | Polymer Through Anion  | Seesaw               | 4 | Non-Chelate       | S-Donor         |
| 246 | DORSIM   | 304 | Dimer Through Anion    | Tetrahedral          | 4 | Metal Halide Only | Chlorine        |
| 247 | DOTLIH   | 305 | Dimer Through Anion    | Tetrahedral          | 4 | Metal Halide Only | Chlorine        |
| 248 | DPSOHG   | 306 | Discrete Molecule      | Trigonal             | 3 | Non-Chelate       | O-Donor         |
| 249 | DTIZHG01 | 307 | Discrete Molecule      | Trigonal             | 3 | Non-Chelate       | S-Donor         |
| 250 | DTIZHG10 | 308 | Polymer Through Anion  | Bent                 | 4 | Non-Chelate       | S-Donor         |
| 251 | DUCVAY10 | 309 | Discrete Molecule      | Linear               | 2 | Metal Halide Only | Chlorine        |
| 252 | DUFQIE   | 310 | Dimer Through Anion    | Seesaw               | 4 | Chelate           | S-Donor         |
| 253 | DUFREB   | 311 | Dimer Through Anion    | Seesaw               | 4 | Chelate           | S-Donor         |
| 254 | DUFSUS   | 312 | Dimer Through Anion    | Seesaw               | 4 | Chelate           | S-Donor         |
| 255 | DUHPUS   | 313 | Dimer Through Anion    | Seesaw               | 4 | Non-Chelate       | N-Donor         |
| 256 | DUKDIY   | 314 | Discrete Molecule      | Tetrahedral          | 4 | Metal Halide Only | Chlorine        |
| 257 | DUKHAU   | 315 | Discrete Molecule      | Tetrahedral          | 4 | Metal Halide Only | Chlorine        |
| 258 | DUKLOL   | 316 | Discrete Molecule      | D-Octahedral         | 6 | Chelate           | N-Donor         |
| 259 | DUKLOL01 | 317 | Discrete Molecule      | D-Octahedral         | 6 | Chelate           | N-Donor         |
| 260 | DULQIL   | 318 | Discrete Molecule      | T-Shape              | 5 | Non-Chelate       | N-Donor         |
| 261 | DURNUA   | 319 | Discrete Molecule      | Seesaw               | 4 | Non-Chelate       | S-Donor         |
| 262 | DURWIX   | 320 | Discrete Molecule      | Seesaw               | 4 | Non-Chelate       | S-Donor         |
| 263 | DUSFAA   | 321 | Dimer Through Ligand   | Trigonal             | 3 | Non-Chelate       | O-Donor         |
| 264 | DUTDEB   | 322 | Dimer Through Anion    | D-Tetrahedral (Py)   | 4 | Non-Chelate       | P-Donor         |
| 265 | DUTDIF   | 323 | Discrete Molecule      | Seesaw               | 4 | Non-Chelate       | P-Donor         |
| 266 | DUWMIR   | 324 | Discrete Molecule      | Seesaw               | 4 | Chelate           | P-Donor         |
| 267 | DUWXAV   | 325 | Discrete Molecule      | Pentagonal Bipyramid | 7 | Chelate           | O-Donor         |
|     |          | 326 | Discrete Molecule      | Tetrahedral          | 4 | Metal Halide Only | Chlorine        |
| 268 | EAMCHG   | 327 | Polymer Through Anion  | Trigonal Bipyramid   | 5 | Metal Halide Only | Chlorine        |
| 269 | EBAROP   | 328 | Discrete Molecule      | Seesaw               | 4 | Non-Chelate       | C-Donor         |
| 270 | EBARUV   | 329 | Discrete Molecule      | Seesaw               | 4 | Non-Chelate       | C-Donor         |
| 271 | EBASAC   | 330 | Discrete Molecule      | Seesaw               | 4 | Non-Chelate       | C-Donor         |
| 272 | EBASEG   | 331 | Discrete Molecule      | Seesaw               | 4 | Non-Chelate       | C-Donor         |
| 273 | EBASIK   | 332 | Discrete Molecule      | Seesaw               | 4 | Non-Chelate       | C-Donor         |
| 274 | EBASOQ   | 333 | Dimer Through Anion    | Seesaw               | 4 | Non-Chelate       | C-Donor         |
|     |          | 334 | Discrete Molecule      | Linear               | 2 | Non-Chelate       | C-Donor         |
| 275 | EBATAD   | 335 | Polymer Through Anion  | Seesaw               | 4 | Non-Chelate       | C-Donor         |
| 276 | EBATEH   | 336 | Polymer Through Anion  | Seesaw               | 4 | Non-Chelate       | C-Donor         |
| 277 | ECAWAI   | 337 | Dimer Through Anion    | D-Tetrahedral (Py)   | 4 | Non-Chelate       | Se-Donor        |
| 278 | EFASIN   | 338 | Discrete Molecule      | Seesaw               | 4 | Chelate           | O-Donor         |
| 279 | EFOYEF   | 339 | Discrete Molecule      | Tetrahedral          | 4 | Metal Halide Only | Chlorine        |
| 280 | EFUKEX   | 340 | Discrete Molecule      | Seesaw               | 4 | Non-Chelate       | S-Donor         |
| 281 | EHIVUN   | 341 | Discrete Molecule      | Square Pyramid       | 5 | Chelate           | N-Donor         |
| 282 | EHIWAU   | 342 | Polymer Through Ligand | T-Shape              | 5 | Chelate           | N-Donor O-Donor |
| 283 | EHUJEX   | 343 | Dimer Through Anion    | Square Pyramid       | 5 | Chelate           | N-Donor         |
| 284 | EHXGMC   | 344 | Discrete Molecule      | T-Shape              | 6 | Chelate           | O-Donor         |
| 285 | EJOPEZ   | 345 | Polymer Through Anion  | D-Square Pyramid     | 5 | Non-Chelate       | N-Donor         |
| 286 | EJOXUY   | 346 | Polymer Through Anion  | Square Pyramid       | 5 | Non-Chelate       | N-Donor         |
| 287 | EKAPOX   | 347 | Discrete Molecule      | T-Shape              | 6 | Non-Chelate       | N-Donor O-Donor |
| 288 | ELEXOK   | 348 | Trimer Through Anion   | Seesaw               | 4 | Non-Chelate       | S-Donor N-Donor |
|     |          | 349 | Trimer Through Anion   | D-Square Planar      | 4 | Non-Chelate       | S-Donor         |
| 289 | EMIGAK   | 350 | Dimer Through Ligand   | Seesaw               | 4 | Non-Chelate       | O-Donor N-Donor |
| 290 | EMIPAT   | 351 | Dimer Through Ligand   | Seesaw               | 4 | Non-Chelate       | O-Donor N-Donor |
| 291 | EMOPUT   | 352 | Discrete Molecule      | Tetrahedral          | 4 | Metal Halide Only | Chlorine        |
| 292 | EMSCHG   | 353 | Dimer Through Anion    | D-Tetrahedral (Py)   | 4 | Non-Chelate       | S-Donor         |
| 293 | EMUDUN   | 354 | Discrete molecule      | Tetrahedral          | 4 | Metal Halide Only | Chlorine        |
| 294 | ENOREF   | 355 | Discrete Molecule      | Seesaw               | 4 | Chelate           | O-Donor         |
| 295 | EQUHUT   | 356 | Discrete Molecule      | T-Shape              | 5 | Chelate           | O-Donor         |



|     |          |     |                        |                      |   |                   |     |           |         |
|-----|----------|-----|------------------------|----------------------|---|-------------------|-----|-----------|---------|
| 296 | EQUWUJ   | 357 | Polymer Through Ligand | D-Octahedral         | 6 | Non-Chelate       |     | N-Donor   |         |
| 297 | ERIBAI   | 358 | Discrete Molecule      | Seesaw               | 4 | Non-Chelate       |     | Se-Donor  | N-Donor |
| 298 | ETANUI   | 359 | Discrete Molecule      | Seesaw               | 4 | Chelate           |     | N-Donor   |         |
| 299 | ETAPAQ   | 360 | Discrete Molecule      | Seesaw               | 4 | Chelate           |     | N-Donor   |         |
| 300 | ETOVEP   | 361 | Dimer Through Ligand   | Seesaw               | 4 | Non-Chelate       |     | N-Donor   |         |
| 301 | ETPHGC10 | 362 | Dimer Through Anion    | D-Tetrahedral (Py)   | 4 | Non-Chelate       |     | P-Donor   |         |
| 302 | ETUMOW   | 363 | Polymer Through Anion  | D-Octahedral         | 6 | Non-Chelate       |     | N-Donor   | O-Donor |
|     |          | 364 | Polymer Through Ligand | D-Octahedral         | 6 | Non-Chelate       |     | N-Donor   | O-Donor |
| 303 | ETURHG   | 365 | Discrete Molecule      | Square Planar        | 4 | Non-Chelate       |     | O-Donor   |         |
| 304 | EWIPIK   | 366 | Polymer Through Ligand | Seesaw               | 4 | Non-Chelate       |     | N-Donor   |         |
| 305 | EWOQUC   | 367 | Polymer Through Anion  | D-Octahedral         | 6 | Non-Chelate       |     | N-Donor   |         |
| 306 | EWORIR   | 368 | Polymer Through Anion  | Square Pyramid       | 5 | Non-Chelate       |     | N-Donor   |         |
|     |          | 369 | Polymer Through Anion  | D-Octahedral         | 6 | Non-Chelate       |     | N-Donor   |         |
| 307 | EWORIR01 | 370 | Polymer Through Anion  | Square Pyramid       | 5 | Non-Chelate       |     | N-Donor   |         |
|     |          | 371 | Polymer Through Anion  | D-Octahedral         | 6 | Non-Chelate       |     | N-Donor   |         |
| 308 | EXUYAY   | 372 | Polymer Through Ligand | Seesaw               | 4 | Non-Chelate       |     | N-Donor   |         |
| 309 | EZIWUG   | 373 | Discrete Molecule      | Tetrahedral          | 4 | Metal Halide Only |     | Chlorine  |         |
|     |          | 374 | Discrete Molecule      | Trigonal Pyramid     | 3 | Metal Halide Only |     | Chlorine  |         |
| 310 | FADFAR   | 375 | Dimer Through Anion    | D-Tetrahedral (Py)   | 4 | Non-Chelate       |     | Se-Donor  |         |
| 311 | FADWEN   | 376 | Discrete Molecule      | Tetrahedral          | 4 | Metal Halide Only |     | Chlorine  |         |
| 312 | FADWIR   | 377 | Polymer Through Ligand | D-Octahedral         | 6 | Non-Chelate       |     | N-Donor   |         |
| 313 | FAHVEP   | 378 | Discrete Molecule      | Square Pyramid       | 5 | Metal Halide Only |     | Chlorine  |         |
| 314 | FAHWIW   | 379 | Discrete Molecule      | Seesaw               | 4 | Metal to Metal    |     | Ruthenium |         |
| 315 | FAJNUZ   | 380 | Polymer Through Ligand | Seesaw               | 4 | Non-Chelate       |     | S-Donor   |         |
| 316 | FAJPAH   | 381 | Polymer Through Ligand | Seesaw               | 4 | Non-Chelate       |     | S-Donor   |         |
| 317 | FAJPEL   | 382 | Dimer Through Anion    | D-Tetrahedral (Py)   | 4 | Non-Chelate       |     | S-Donor   |         |
| 318 | FAJPIP   | 383 | Dimer Through Anion    | D-Tetrahedral (Py)   | 4 | Non-Chelate       |     | S-Donor   |         |
| 319 | FAQVEY   | 384 | Dimer Through Anion    | D-Tetrahedral (Py)   | 4 | Non-Chelate       |     | S-Donor   |         |
| 320 | FAQVEY01 | 385 | Dimer Through Anion    | D-Tetrahedral (Py)   | 4 | Non-Chelate       |     | S-Donor   |         |
| 321 | FATREY   | 386 | Dimer Through Anion    | Tetrahedral          | 4 | Metal Halide Only |     | Chlorine  |         |
|     |          | 387 | Discrete Molecule      | Linear               | 2 | Metal Halide Only |     | Chlorine  |         |
| 322 | FATSEY   | 388 | Discrete Molecule      | Seesaw               | 4 | Metal to Metal    |     | Ruthenium |         |
| 323 | FAXGIW   | 389 | Polymer Through Ligand | Seesaw               | 4 | Non-Chelate       |     | N-Donor   |         |
| 324 | FAXHET   | 390 | Polymer Through Ligand | Seesaw               | 4 | Non-Chelate       |     | N-Donor   |         |
| 325 | FAXHIX   | 391 | Dimer Through Ligand   | Seesaw               | 4 | Non-Chelate       |     | N-Donor   |         |
| 326 | FECHEC   | 392 | Polymer Through Ligand | Seesaw               | 4 | Non-Chelate       |     | N-Donor   |         |
| 327 | FEGDIF   | 393 | Discrete Molecule      | D-Tetrahedral (Py)   | 4 | Non-Chelate       |     | N-Donor   |         |
| 328 | FEGLAE   | 394 | Oligomer Through Anion | Seesaw               | 4 | Metal Halide Only |     | Chlorine  |         |
|     |          | 395 | Oligomer Through Anion | Square Planar        | 4 | Metal Halide Only |     | Chlorine  |         |
|     |          | 396 | Oligomer Through Anion | Trigonal             | 3 | Non-Chelate       |     | O-Donor   |         |
|     |          | 397 | Discrete Molecule      | Linear               | 2 | Metal Halide Only |     | Chlorine  |         |
| 329 | FEHDUS   | 398 | Dimer Through Anion    | Tetrahedral          | 4 | Metal Halide Only |     | Chlorine  |         |
| 330 | FEJBIH   | 399 | Discrete Molecule      | T-Shape              | 5 | Chelate           | M-M | O-Donor   | Nickel  |
| 331 | FEJBUT   | 400 | Discrete Molecule      | T-Shape              | 5 | Chelate           | M-M | O-Donor   | Nickel  |
| 332 | FEJCAA   | 401 | Discrete Molecule      | T-Shape              | 5 | Chelate           | M-M | O-Donor   | Nickel  |
| 333 | FELMIU   | 402 | Polymer Through Ligand | D-Trigonal Bipyramid | 5 | Chelate           |     | N-Donor   |         |
| 334 | FEMSUL10 | 403 | Oligomer Through Anion | Square Pyramid       | 5 | Metal Halide Only |     | Chlorine  |         |
|     |          | 404 | Oligomer Through Anion | Tetrahedral          | 4 | Metal Halide Only |     | Chlorine  |         |
| 335 | FEMTAS10 | 405 | Polymer Through Anion  | Seesaw               | 4 | Metal Halide Only |     | Chlorine  |         |
|     |          | 406 | Polymer Through Anion  | Tetrahedral          | 4 | Metal Halide Only |     | Chlorine  |         |
| 336 | FEYCIW   | 407 | Discrete Molecule      | Seesaw               | 4 | Chelate           |     | N-Donor   |         |
| 337 | FEYDAP   | 408 | Polymer Through Ligand | Trigonal Bipyramid   | 5 | Chelate           |     | N-Donor   | S-Donor |
|     |          | 409 | Polymer Through Anion  | Trigonal Bipyramid   | 5 | Chelate           |     | N-Donor   | S-Donor |
| 338 | FIPMIC   | 410 | Discrete Molecule      | D-Octahedral         | 6 | Chelate           |     | O-Donor   | N-Donor |
| 339 | FISBEO   | 411 | Tetramer Through Anion | Trigonal Pyramid     | 4 | Metal Halide Only |     | Chlorine  |         |
|     |          | 412 | Tetramer Through Anion | Tetrahedral          | 4 | Metal Halide Only |     | Chlorine  |         |
|     |          | 413 | Tetramer Through Anion | Seesaw               | 4 | Metal Halide Only |     | Chlorine  |         |
| 340 | FISBOY   | 414 | Polymer Through Anion  | Octahedral           | 6 | Metal Halide Only |     | Chlorine  |         |
|     |          | 415 | Polymer Through Anion  | Tetrahedral          | 4 | Metal Halide Only |     | Chlorine  |         |
|     |          | 416 | Polymer Through Anion  | Bent                 | 2 | Metal Halide Only |     | Chlorine  |         |
| 341 | FISBUE   | 417 | Discrete Molecule      | Tetrahedral          | 4 | Metal Halide Only |     | Chlorine  |         |
|     |          | 418 | Discrete Molecule      | Linear               | 2 | Metal Halide Only |     | Chlorine  |         |
| 342 | FISCAL   | 419 | Polymer Through Anion  | Square Pyramid       | 5 | Metal Halide Only |     | Chlorine  |         |

|            |                 |     |                        |                      |   |                   |           |          |
|------------|-----------------|-----|------------------------|----------------------|---|-------------------|-----------|----------|
|            |                 | 420 | Polymer Through Anion  | Tetrahedral          | 4 | Metal Halide Only | Chlorine  |          |
| <b>343</b> | <b>FISLEY</b>   | 421 | Dimer Through Anion    | Tetrahedral          | 4 | Metal Halide Only | Chlorine  |          |
| <b>344</b> | <b>FOCLEO</b>   | 422 | Discrete Molecule      | Linear               | 2 | Non-Chelate       | C-Donor   |          |
|            |                 | 423 | Trimer Through Anion   | Linear               | 2 | Non-Chelate       | C-Donor   |          |
|            |                 | 424 | Trimer Through Anion   | Trigonal             | 3 | Non-Chelate       | C-Donor   |          |
|            |                 | 425 | Trimer Through Anion   | Tetrahedral          | 4 | Non-Chelate       | C-Donor   |          |
| <b>345</b> | <b>FOCLIS</b>   | 426 | Dimer Through Anion    | Trigonal             | 3 | Non-Chelate       | C-Donor   |          |
|            |                 | 427 | Dimer Through Anion    | Trigonal Pyramid     | 4 | Non-Chelate       | C-Donor   |          |
| <b>346</b> | <b>FOCLOY</b>   | 428 | Discrete Molecule      | Linear               | 2 | Non-Chelate       | C-Donor   |          |
|            |                 | 429 | Trimer Through Anion   | Linear               | 2 | Non-Chelate       | C-Donor   |          |
|            |                 | 430 | Trimer Through Anion   | Trigonal             | 3 | Non-Chelate       | C-Donor   |          |
|            |                 | 431 | Trimer Through Anion   | Tetrahedral          | 4 | Non-Chelate       | C-Donor   |          |
| <b>347</b> | <b>FOGZUX</b>   | 432 | Discrete Molecule      | D-Octahedral         | 6 | Chelate           | N-Donor   |          |
| <b>348</b> | <b>FOJZEJ</b>   | 433 | Discrete Molecule      | T-Shape              | 5 | Chelate           | S-Donor   | N-Donor  |
| <b>349</b> | <b>FOTMIM</b>   | 434 | Discrete Molecule      | Seesaw               | 4 | Non-Chelate       | N-Donor   |          |
| <b>350</b> | <b>FOVFEB10</b> | 435 | Polymer Through Anion  | Seesaw               | 4 | Non-Chelate       | S-Donor   |          |
| <b>351</b> | <b>FOWBID</b>   | 436 | Dimer Through Anion    | Square Pyramid       | 5 | Non-Chelate       | N-Donor   |          |
| <b>352</b> | <b>FOWCOL</b>   | 437 | Dimer Through Anion    | Seesaw               | 4 | Non-Chelate       | C-Donor   | N-Donor  |
| <b>353</b> | <b>FOZHAE</b>   | 438 | Polymer Through Ligand | Seesaw               | 4 | Non-Chelate       | S-Donor   |          |
| <b>354</b> | <b>FOZHIM</b>   | 439 | Discrete Molecule      | Seesaw               | 4 | Non-Chelate       | S-Donor   |          |
| <b>355</b> | <b>FOZXAV</b>   | 440 | Dimer Through Anion    | Seesaw               | 4 | Non-Chelate       | C-Donor   |          |
|            |                 | 441 | Dimer Through Anion    | Seesaw               | 4 | Metal Halide Only | Iodine    |          |
| <b>356</b> | <b>FTFHGC10</b> | 442 | Dimer Through Anion    | Tetrahedral          | 4 | Metal Halide Only | Chlorine  |          |
|            |                 | 443 | Polymer Through Anion  | Trigonal Bipyramid   | 5 | Metal Halide Only | Chlorine  |          |
| <b>357</b> | <b>FULBOD</b>   | 444 | Dimer Through Anion    | D-Tetrahedral (Py)   | 4 | Non-Chelate       | Se-Donor  |          |
| <b>358</b> | <b>FUYWON</b>   | 445 | Discrete Molecule      | Seesaw               | 4 | Non-Chelate       | S-Donor   |          |
| <b>359</b> | <b>GADVEO</b>   | 446 | Dimer Through Anion    | Trigonal Bipyramid   | 5 | Chelate           | N-Donor   | Fluorine |
|            |                 | 447 | Dimer Through Ligand   | Trigonal Bipyramid   | 5 | Chelate           | N-Donor   | Fluorine |
| <b>360</b> | <b>GAFSAJ</b>   | 448 | Discrete Molecule      | Tetrahedral          | 4 | Metal Halide Only | Chlorine  |          |
| <b>361</b> | <b>GAJGAA</b>   | 449 | Dimer Through Ligand   | Seesaw               | 4 | Non-Chelate       | N-Donor   |          |
| <b>362</b> | <b>GAJGEE</b>   | 450 | Discrete Molecule      | D-Octahedral         | 6 | Chelate           | N-Donor   |          |
| <b>363</b> | <b>GANRIY</b>   | 451 | Discrete Molecule      | Tetrahedral          | 4 | Metal Halide Only | Chlorine  |          |
| <b>364</b> | <b>GAVBOV</b>   | 452 | Dimer Through Ligand   | T-Shape              | 5 | Chelate           | N-Donor   |          |
| <b>365</b> | <b>GEFTEQ10</b> | 453 | Dimer through anion    | D-Tetrahedral (Py)   | 4 | Metal to Metal    | Ruthenium |          |
| <b>366</b> | <b>GEFTIU10</b> | 454 | Dimer Through Anion    | D-Tetrahedral (Py)   | 4 | Metal to Metal    | Ruthenium |          |
| <b>367</b> | <b>GEHNUD</b>   | 455 | Discrete Molecule      | Tetrahedral          | 4 | Metal Halide Only | Chlorine  |          |
| <b>368</b> | <b>GEKTIB</b>   | 456 | Discrete Molecule      | Tetrahedral          | 4 | Metal Halide Only | Chlorine  |          |
| <b>369</b> | <b>GELKIR</b>   | 457 | Polymer Through Anion  | Pentagonal Bipyramid | 4 | Chelate           | N-Donor   |          |
|            |                 | 458 | Polymer Through Anion  | Tetrahedral          | 4 | Metal Halide Only | Chlorine  |          |
| <b>370</b> | <b>GEQXIK</b>   | 459 | Discrete Molecule      | Seesaw               | 4 | Chelate           | N-Donor   |          |
| <b>371</b> | <b>GEQXUW</b>   | 460 | Discrete Molecule      | T-Shape              | 5 | Chelate           | N-Donor   |          |
| <b>372</b> | <b>GEYJOG</b>   | 461 | Dimer Through Anion    | Seesaw               | 4 | Chelate           | P-Donor   |          |
| <b>373</b> | <b>GIFYUP</b>   | 462 | Dimer Through Anion    | Seesaw               | 4 | Metal Halide Only | Chlorine  |          |
| <b>374</b> | <b>GIWZOB</b>   | 463 | Discrete Molecule      | D-Trigonal Bipyramid | 5 | Chelate           | N-Donor   | O-Donor  |
| <b>375</b> | <b>GOKFAN</b>   | 464 | Polymer Through Anion  | Square Pyramid       | 5 | Non-Chelate       | S-Donor   |          |
| <b>376</b> | <b>GOKPIG</b>   | 465 | Pentamer Through Anion | Seesaw               | 4 | Metal to Metal    | Tellurium |          |
| <b>377</b> | <b>GOKVIL</b>   | 466 | Dimer Through Anion    | Tetrahedral          | 4 | Metal Halide Only | Chlorine  |          |
| <b>378</b> | <b>GOZROC</b>   | 467 | Dimer Through Anion    | Seesaw               | 4 | Non-Chelate       | S-Donor   |          |
|            |                 | 468 | Dimer Through Anion    | Tetrahedral          | 4 | Metal Halide Only | Chlorine  |          |
| <b>379</b> | <b>GOZRUI</b>   | 469 | Discrete Molecule      | Seesaw               | 4 | Non-Chelate       | S-Donor   |          |
| <b>380</b> | <b>GUBFIS</b>   | 470 | Dimer Through Anion    | Seesaw               | 5 | Chelate           | O-Donor   |          |
|            |                 | 471 | Discrete Molecule      | Seesaw               | 5 | Chelate           | N-Donor   |          |
| <b>381</b> | <b>GUGZAJ</b>   | 472 | Discrete Molecule      | Seesaw               | 4 | Non-Chelate       | S-Donor   |          |
| <b>382</b> | <b>GURKOU</b>   | 473 | Discrete Molecule      | Square Planar        | 4 | Non-Chelate       | N-Donor   |          |
| <b>383</b> | <b>GUTLEN</b>   | 474 | Dimer Through Anion    | D-Octahedral         | 6 | Non-Chelate       | N-Donor   |          |
|            |                 | 475 | Dimer Through Anion    | Tetrahedral          | 4 | Metal Halide Only | Chlorine  |          |
| <b>384</b> | <b>HARRAV</b>   | 476 | Dimer Through Anion    | Trigonal Bipyramid   | 5 | Non-Chelate       | O-Donor   |          |
|            |                 | 477 | Dimer Through Anion    | Seesaw               | 4 | Non-Chelate       | N-Donor   |          |
|            |                 | 478 | Discrete Molecule      | Trigonal             | 3 | Non-Chelate       | N-Donor   |          |
| <b>385</b> | <b>HARREZ</b>   | 479 | Discrete Molecule      | T-Shape              | 5 | Chelate           | N-Donor   | O-Donor  |
| <b>386</b> | <b>HATQUQ</b>   | 480 | Polymer Through Anion  | Trigonal Pyramid     | 4 | Metal Halide Only | Chlorine  |          |
| <b>387</b> | <b>HATRAX</b>   | 481 | Polymer Through Anion  | Trigonal Bipyramid   | 5 | Metal Halide Only | Chlorine  |          |

|     |          |     |                         |                    |   |                   |          |         |
|-----|----------|-----|-------------------------|--------------------|---|-------------------|----------|---------|
| 388 | HAVCEO   | 482 | Discrete Molecule       | T-Shape            | 5 | Non-Chelate       | N-Donor  | O-Donor |
| 389 | HECQEM   | 483 | Discrete Molecule       | T-Shape            | 5 | Non-Chelate       | S-Donor  | N-Donor |
| 390 | HEDMOS   | 484 | Discrete Molecule       | Seesaw             | 4 | Chelate           | N-Donor  |         |
| 391 | HEHDAB   | 485 | Discrete Molecule       | Seesaw             | 4 | Non-Chelate       | N-Donor  |         |
| 392 | HETYAH   | 486 | Dimer Through Ligand    | Seesaw             | 4 | Chelate           | N-Donor  | S-Donor |
| 393 | HEYDEV   | 487 | Polymer Through Ligand  | Seesaw             | 4 | Non-Chelate       | N-Donor  |         |
| 394 | HEYVAJ   | 488 | Dimer Through Anion     | Tetrahedral        | 4 | Metal Halide Only | Chlorine |         |
|     |          | 489 | Dimer Through Anion     | D-Tetrahedral (Py) | 4 | Metal Halide Only | O-Donor  |         |
| 395 | HGCBPO10 | 490 | Polymer Through Anion   | Seesaw             | 4 | Non-Chelate       | O-Donor  |         |
| 396 | HGCETS   | 491 | Polymer Through Anion   | Seesaw             | 4 | Non-Chelate       | S-Donor  |         |
|     |          | 492 | Polymer Through Anion   | Trigonal Bipyramid | 5 | Metal Halide Only | Chlorine |         |
| 397 | HGCLTU   | 493 | Polymer Through Anion   | Seesaw             | 4 | Non-Chelate       | S-donor  |         |
|     |          | 494 | Discrete Molecule       | Linear             | 2 | Metal Halide Only | Chlorine |         |
| 398 | HGCPAO   | 495 | Dimer Through Anion     | Seesaw             | 4 | Non-Chelate       | O-Donor  |         |
| 399 | HGCPHO10 | 496 | Discrete Molecule       | Square Planar      | 4 | Non-Chelate       | S-Donor  |         |
| 400 | HGCSCD10 | 497 | Polymer Through Ligand  | Trigonal           | 3 | Metal Halide Only | Chlorine |         |
|     |          | 498 | Polymer Through Anion   | Seesaw             | 4 | Non-Chelate       | S-Donor  |         |
| 401 | HGCTHS   | 499 | Dimer Through Anion     | D-Tetrahedral (Py) | 4 | Non-Chelate       | S-Donor  |         |
| 402 | HGCTHS01 | 500 | Dimer Through Anion     | D-Tetrahedral (Py) | 4 | Non-Chelate       | S-Donor  |         |
| 403 | HGCTOX   | 501 | Discrete Molecule       | Seesaw             | 4 | Non-Chelate       | S-Donor  |         |
| 404 | HGPARO   | 502 | Discrete Molecule       | Seesaw             | 4 | Non-Chelate       | O-Donor  |         |
| 405 | HGTPSE   | 503 | Dimer Through Anion     | D-Tetrahedral (Py) | 4 | Non-Chelate       | Se-Donor |         |
| 406 | HGTRIT   | 504 | Polymer Through Ligand  | Seesaw             | 4 | Non-Chelate       | S-donor  |         |
| 407 | HIGQUL   | 505 | Polymer Through Anion   | D-Octahedral       | 6 | Non-Chelate       | N-Donor  |         |
| 408 | HIRWEK   | 506 | Discrete Molecule       | T-Shape            | 5 | Non-Chelate       | N-Donor  |         |
| 409 | HIRWIO   | 507 | Dimer Through Anion     | Tetrahedral        | 4 | Metal Halide Only | Chlorine |         |
| 410 | HISHGC   | 508 | Discrete Molecule       | D-Tetrahedral (Py) | 4 | Non-Chelate       | O-Donor  |         |
| 411 | HIVREJ   | 509 | Dimer Through Anion     | Tetrahedral        | 4 | Metal Halide Only | Chlorine |         |
|     |          | 510 | Discrete Molecule       | Linear             | 2 | Metal Halide Only | Chlorine |         |
| 412 | HIVVAL   | 511 | Discrete Molecule       | Seesaw             | 4 | Non-Chelate       | N-Donor  |         |
| 413 | HIXMUY   | 512 | Discrete Molecule       | Seesaw             | 4 | Chelate           | N-Donor  |         |
| 414 | HOCMAN   | 513 | Discrete Molecule       | Seesaw             | 4 | Chelate           | N-Donor  | S-Donor |
| 415 | HODBUX   | 514 | Polymer Through Anion   | D-Tetrahedral (Py) | 4 | Non-Chelate       | O-Donor  |         |
|     |          | 515 | Polymer Through Ligand  | D-Tetrahedral (Py) | 4 | Non-Chelate       | O-Donor  |         |
| 416 | HOTBID   | 516 | Polymer Through Ligand  | D-Square Pyramid   | 5 | Non-Chelate       | O-Donor  | N-Donor |
| 417 | HOXBEB   | 517 | Oligomer Through Anion  | Seesaw             | 4 | Non-Chelate       | P-Donor  |         |
| 418 | HOXBIF   | 518 | Oligomer Through Anion  | Seesaw             | 4 | Non-Chelate       | P-Donor  |         |
| 419 | HOXCEC   | 519 | Oligomer Through Anion  | Seesaw             | 4 | Non-Chelate       | P-Donor  |         |
| 420 | HOXZUP   | 520 | Tetramer Through Anion  | D-Tetrahedral (Py) | 4 | Non-Chelate       | O-Donor  | N-Donor |
|     |          | 521 | Tetramer Through Ligand | D-Tetrahedral (Py) | 4 | Non-Chelate       | O-Donor  | N-Donor |
| 421 | HUBCUD   | 522 | Discrete Molecule       | T-Shape            | 5 | Non-Chelate       | N-Donor  |         |
| 422 | HUBDAK   | 523 | Discrete Molecule       | T-Shape            | 5 | Non-Chelate       | N-Donor  |         |
| 423 | HUBDEO   | 524 | Discrete Molecule       | T-Shape            | 5 | Non-Chelate       | N-Donor  |         |
| 424 | HUBDIS   | 525 | Discrete Molecule       | T-Shape            | 5 | Non-Chelate       | N-Donor  |         |
| 425 | HUBDOY   | 526 | Discrete Molecule       | T-Shape            | 5 | Non-Chelate       | N-Donor  |         |
| 426 | HUBDUE   | 527 | Discrete Molecule       | T-Shape            | 5 | Non-Chelate       | N-Donor  |         |
| 427 | HUKTAJ   | 528 | Polymer Through Ligand  | Square Pyramid     | 5 | Non-Chelate       | N-Donor  |         |
| 428 | HUKTEN   | 529 | Polymer Through Ligand  | Seesaw             | 4 | Non-Chelate       | N-Donor  |         |
| 429 | HULKUW   | 530 | Polymer Through Anion   | Trigonal Bipyramid | 5 | Metal Halide Only | Chlorine |         |
| 430 | HUPKEK   | 531 | Discrete Molecule       | Tetrahedral        | 4 | Metal Halide Only | Chlorine |         |
| 431 | IBAFEY   | 532 | Discrete Molecule       | Trigonal           | 3 | Non-Chelate       | C-Donor  |         |
| 432 | IBAFIC   | 533 | Discrete Molecule       | Trigonal           | 3 | Non-Chelate       | C-Donor  |         |
| 433 | IBIRIV   | 534 | Dimer Through Ligand    | Seesaw             | 4 | Non-Chelate       | N-Donor  |         |
| 434 | IBUWEJ   | 535 | Discrete Molecule       | T-Shape            | 5 | Non-Chelate       | N-Donor  | O-Donor |
| 435 | ICUWIM   | 536 | Discrete Molecule       | Trigonal           | 3 | Non-Chelate       | O-Donor  |         |
| 436 | IDEFOO   | 537 | Discrete Molecule       | Tetrahedral        | 4 | Metal Halide Only | Chlorine |         |
| 437 | IGEFIJ   | 538 | Polymer Through Anion   | D-Tetrahedral (Py) | 4 | Non-Chelate       | N-Donor  |         |
|     |          | 539 | Polymer Through Ligand  | D-Tetrahedral (Py) | 4 | Non-Chelate       | N-Donor  |         |
| 438 | IGEMOX   | 540 | Polymer through ligand  | Square Pyramid     | 5 | Non-Chelate       | N-Donor  |         |
| 439 | IGOPOJ   | 541 | Tetramer Through Ligand | Square Pyramid     | 5 | Non-Chelate       | O-Donor  |         |
|     |          | 542 | Tetramer Through Ligand | Seesaw             | 4 | Non-Chelate       | O-Donor  |         |
| 440 | IGUQUX   | 543 | Polymer Through Ligand  | Seesaw             | 5 | Non-Chelate       | N-Donor  |         |

|     |          |     |                         |                      |   |                   |                 |
|-----|----------|-----|-------------------------|----------------------|---|-------------------|-----------------|
| 441 | IJEKIS   | 544 | Polymer Through Anion   | Tetrahedral          | 5 | Metal Halide Only | Chlorine        |
| 442 | IJEKOY   | 545 | Dimer Through Anion     | Tetrahedral          | 5 | Metal Halide Only | Chlorine        |
| 443 | IJIRAV   | 546 | Polymer Through Anion   | Tetrahedral          | 5 | Metal Halide Only | Chlorine        |
| 444 | IJIREZ   | 547 | Dimer Through Anion     | Tetrahedral          | 5 | Metal Halide Only | Chlorine        |
| 445 | IJIRID   | 548 | Discrete Molecule       | Tetrahedral          | 4 | Metal Halide Only | Chlorine        |
| 446 | IJIROJ   | 549 | Discrete Molecule       | Tetrahedral          | 4 | Metal Halide Only | Chlorine        |
| 447 | IJIRUP   | 550 | Discrete Molecule       | Tetrahedral          | 4 | Metal Halide Only | Chlorine        |
| 448 | IMATAS   | 551 | Discrete Molecule       | Tetrahedral          | 4 | Metal Halide Only | Chlorine        |
| 449 | INIYAF   | 552 | Tetramer Through Anion  | D-Square Pyramid     | 5 | Non-Chelate       | N-Donor O-Donor |
|     |          | 553 | Tetramer Through Anion  | D-Trigonal Bipyramid | 5 | Metal Halide Only | Chlorine        |
| 450 | IPADUY   | 554 | Polymer Through Anion   | D-Octahedral         | 6 | Non-Chelate       | N-Donor O-Donor |
| 451 | IPAFAG   | 555 | Polymer Through Anion   | Tetrahedral          | 4 | Metal Halide Only | Chlorine        |
|     |          | 556 | Polymer Through Anion   | Octahedral           | 6 | Metal Halide Only | Chlorine        |
| 452 | IPILID   | 557 | Discrete Molecule       | T-Shape              | 5 | Non-Chelate       | N-Donor         |
| 453 | IPOTUD   | 558 | Polymer Through Anion   | Square Planar        | 4 | Non-Chelate       | P-Donor         |
|     |          | 559 | Polymer Through Anion   | Square Pyramid       | 4 | Metal Halide Only | Chlorine        |
|     |          | 560 | Polymer Through Anion   | Seesaw               | 5 | Metal Halide Only | Chlorine        |
| 454 | IQIHUM   | 561 | Discrete Molecule       | Seesaw               | 4 | Non-Chelate       | N-Donor         |
| 455 | IREMEZ   | 562 | Dimer Through Anion     | Tetrahedral          | 4 | Metal Halide Only | Chlorine        |
| 456 | IRETOP   | 563 | Dimer Through Anion     | Seesaw               | 4 | Non-Chelate       | S-Donor         |
| 457 | IRIZOA   | 564 | Discrete Molecule       | Tetrahedral          | 4 | Metal Halide Only | Chlorine        |
|     |          | 565 | Trimer Through Anion    | Trigonal Pyramid     | 3 | Non-Chelate       | N-Donor         |
| 458 | IRUTUK   | 566 | Discrete Molecule       | Seesaw               | 4 | Non-Chelate       | Bromine         |
| 459 | ISADEM   | 567 | Polymer Through Ligand  | D-Square Planar      | 4 | Non-Chelate       | O-Donor         |
| 460 | ISATOM   | 568 | Polymer Through Ligand  | Seesaw               | 4 | Non-Chelate       | N-Donor         |
| 461 | ISETUW   | 569 | Discrete Molecule       | Square Planar        | 4 | Metal Halide Only | Chlorine        |
|     |          | 570 | Trimer Through Anion    | Linear               | 2 | Non-Chelate       | C-Donor         |
| 462 | ISEVOS   | 571 | Dimer Through Ligand    | Seesaw               | 4 | Non-Chelate       | S-Donor         |
| 463 | JADDEX   | 572 | Discrete Molecule       | Seesaw               | 4 | Non-Chelate       | P-Donor         |
| 464 | JADPAF   | 573 | Polymer Through Anion   | Square Pyramid       | 5 | Metal Halide Only | Chlorine        |
|     |          | 574 | Polymer Through Anion   | Seesaw               | 4 | Metal Halide Only | Chlorine        |
| 465 | JADSIT   | 575 | Polymer Through Anion   | Trigonal Bipyramid   | 5 | Metal Halide Only | Chlorine        |
| 466 | JADTEQ   | 576 | Discrete Molecule       | Seesaw               | 4 | Chelate           | N-Donor         |
| 467 | JAGMOU   | 577 | Dimer Through Anion     | D-Square Pyramid     | 5 | Chelate           | N-Donor         |
| 468 | JAGMUA   | 578 | Dimer Through Anion     | D-Square Pyramid     | 5 | Chelate           | N-Donor         |
| 469 | JAHCEA   | 579 | Polymer Through Ligand  | D-Octahedral         | 6 | Non-Chelate       | O-Donor         |
| 470 | JAJTEU   | 580 | Discrete molecule       | Seesaw               | 4 | Non-Chelate       | S-Donor         |
| 471 | JAMDAC   | 581 | Discrete molecule       | Seesaw               | 4 | Chelate           | O-Donor         |
| 472 | JAMJIR   | 582 | Dimer Through Anion     | D-Square Pyramid     | 5 | Chelate           | N-Donor         |
| 473 | JAMJOX   | 583 | Polymer Through Anion   | D-Prism              | 6 | Chelate           | N-Donor         |
| 474 | JANDUY   | 584 | Dimer Through Anion     | Trigonal Pyramid     | 4 | Metal Halide Only | Chlorine        |
| 475 | JANFEK   | 585 | Dimer Through Anion     | Trigonal             | 3 | Non-Chelate       | C-Donor         |
| 476 | JAPJAM   | 586 | Polymer Through Ligand  | Seesaw               | 4 | Non-Chelate       | N-Donor         |
| 477 | JAPJAM01 | 587 | Polymer Through Ligand  | Seesaw               | 4 | Non-Chelate       | N-Donor         |
| 478 | JAPJUG   | 588 | Dimer Through Ligand    | Seesaw               | 4 | Non-Chelate       | N-Donor         |
| 479 | JATTAZ   | 589 | Discrete Molecule       | Tetrahedral          | 4 | Metal Halide Only | Chlorine        |
| 480 | JATTED   | 590 | Discrete Molecule       | Tetrahedral          | 4 | Metal Halide Only | Chlorine        |
| 481 | JATTIH   | 591 | Discrete Molecule       | Tetrahedral          | 4 | Metal Halide Only | Chlorine        |
| 482 | JATVAB   | 592 | Polymer Through Anion   | Square Pyramid       | 5 | Metal Halide Only | Chlorine        |
|     |          | 593 | Polymer Through Anion   | Tetrahedral          | 4 | Metal Halide Only | Chlorine        |
| 483 | JENGAK   | 594 | Discrete Molecule       | Tetrahedral          | 4 | Metal Halide Only | Chlorine        |
| 484 | JEPTII   | 595 | Polymer Through Anion   | D-Square Pyramid     | 5 | Metal Halide Only | Chlorine        |
|     |          | 596 | Polymer Through Anion   | D-Octahedral         | 6 | Non-Chelate       | S-Donor         |
| 485 | JEXMOO   | 597 | Polymer Through Ligand  | Seesaw               | 4 | Non-Chelate       | O-Donor         |
| 486 | JIQYAK   | 598 | Polymer Through Ligand  | Seesaw               | 4 | Non-Chelate       | N-Donor         |
| 487 | JIZWEU   | 599 | Tetramer Through Ligand | Seesaw               | 4 | Non-Chelate       | S-Donor         |
| 488 | JOGJOE   | 600 | Discrete Molecule       | Trigonal             | 3 | Metal Halide Only | Chlorine        |
|     |          | 601 | Polymer Through Anion   | Seesaw               | 4 | Metal Halide Only | Chlorine        |
|     |          | 602 | Polymer Through Anion   | Seesaw               | 4 | Non-Chelate       | O-Donor         |
| 489 | JOTXIZ   | 603 | Trimer Through Anion    | T-Shape              | 3 | Metal Halide Only | Chlorine        |
|     |          | 604 | Trimer Through Ligand   | T-Shape              | 5 | Non-Chelate       | O-Donor         |
| 490 | JOTXOF   | 605 | Polymer Through Ligand  | Square Planar        | 4 | Non-Chelate       | O-Donor         |

|     |          |     |                         |                        |   |                   |           |         |
|-----|----------|-----|-------------------------|------------------------|---|-------------------|-----------|---------|
|     |          | 606 | Polymer Through Ligand  | T-Shape                | 5 | Non-Chelate       | O-Donor   |         |
| 491 | JOTXUL   | 607 | Dimer Through Anion     | D-Square Pyramid       | 5 | Non-Chelate       | O-Donor   |         |
| 492 | JOWLEO   | 608 | Dimer Through Anion     | Seesaw                 | 4 | Non-Chelate       | Se-Donor  | P-Donor |
| 493 | JUHYAM   | 609 | Polymer Through Anion   | D-Pentagonal Bipyramid | 7 | Non-Chelate       | O-Donor   | N-Donor |
|     |          | 610 | Polymer Through Anion   | Square Pyramid         | 5 | Metal Halide Only | Chlorine  |         |
|     |          | 611 | Polymer Through Anion   | Trigonal Bipyramid     | 5 | Metal Halide Only | Chlorine  |         |
| 494 | JUHYIU   | 612 | Discrete Molecule       | Hexagonal Bipyramid    | 8 | Non-Chelate       | O-Donor   | N-Donor |
| 495 | JUHYOA   | 613 | Discrete Molecule       | Hexagonal Bipyramid    | 8 | Non-Chelate       | O-Donor   | N-Donor |
| 496 | JUMRIU   | 614 | Polymer Through Anion   | Seesaw                 | 4 | Non-Chelate       | N-Donor   |         |
|     |          | 615 | Polymer Through Anion   | Square Planar          | 4 | Metal Halide Only | Chlorine  |         |
| 497 | JURHUB   | 616 | Discrete Molecule       | Tetrahedral            | 4 | Metal Halide Only | Chlorine  |         |
| 498 | KABRUC   | 617 | Polymer Through Ligand  | D-Octahedral           | 6 | Non-Chelate       | N-Donor   |         |
| 499 | KACBUL   | 618 | Polymer Through Anion   | D-Octahedral           | 6 | Chelate           | O-Donor   | S-Donor |
| 500 | KAMTAT   | 619 | Dimer Through Anion     | D-Tetrahedral (Py)     | 4 | Metal to Metal    | Ruthenium |         |
| 501 | KAPCUB   | 620 | Polymer Through Anion   | Trigonal Pyramid       | 4 | Non-Chelate       | N-Donor   |         |
| 502 | KASTED   | 621 | Dimer Through Anion     | Tetrahedral            | 4 | Metal Halide Only | Chlorine  |         |
| 503 | KATGET   | 622 | Dimer Through Ligand    | Seesaw                 | 4 | Non-Chelate       | N-Donor   |         |
| 504 | KATGIX   | 623 | Dimer Through Ligand    | Seesaw                 | 4 | Non-Chelate       | N-Donor   |         |
| 505 | KATGOD   | 624 | Dimer Through Ligand    | Seesaw                 | 4 | Non-Chelate       | N-Donor   |         |
| 506 | KATGUJ   | 625 | Polymer Through Ligand  | Seesaw                 | 4 | Non-Chelate       | N-Donor   |         |
| 507 | KEJWAX   | 626 | Discrete Molecule       | Seesaw                 | 4 | Chelate           | S-Donor   |         |
| 508 | KEQKEY   | 627 | Dimer Through Ligand    | Seesaw                 | 4 | Non-Chelate       | N-Donor   |         |
| 509 | KEYZUK   | 628 | Discrete Molecule       | Tetrahedral            | 4 | Metal Halide Only | Chlorine  |         |
| 510 | KEZBAT   | 629 | Polymer Through Anion   | Seesaw                 | 4 | Non-Chelate       | O-Donor   |         |
|     |          | 630 | Polymer Through Anion   | Square Pyramid         | 5 | Non-Chelate       | O-Donor   |         |
|     |          | 631 | Polymer Through Anion   | Seesaw                 | 4 | Non-Chelate       | O-Donor   |         |
| 511 | KEZBEX   | 632 | Discrete Molecule       | Trigonal Pyramid       | 4 | Non-Chelate       | N-Donor   |         |
| 512 | KEZBIB   | 633 | Discrete Molecule       | Tetrahedral            | 4 | Metal Halide Only | Chlorine  |         |
| 513 | KEZYOF   | 634 | Discrete Molecule       | T-Shape                | 6 | Chelate           | O-Donor   |         |
| 514 | KIBFOR   | 635 | Polymer Through Ligand  | Square Planar          | 4 | Non-Chelate       | N-Donor   |         |
| 515 | KIBVEW   | 636 | Discrete Molecule       | Trigonal Pyramid       | 4 | Non-Chelate       | N-Donor   |         |
| 516 | KICMOA   | 637 | Polymer Through Anion   | Square Pyramid         | 5 | Chelate           | N-donor   |         |
| 517 | KICYOM   | 638 | Discrete Molecule       | Seesaw                 | 4 | Non-Chelate       | Se-Donor  |         |
| 518 | KIMXEL   | 639 | Polymer Through Anion   | D-Octahedral           | 6 | Non-Chelate       | N-Donor   |         |
|     |          | 640 | Polymer Through Anion   | Seesaw                 | 4 | Metal Halide Only | Chlorine  |         |
| 519 | KIPTUY   | 641 | Dimer Through Anion     | Seesaw                 | 4 | Metal to Metal    | Ruthenium |         |
| 520 | KIYBIE   | 642 | Dimer Through Anion     | Square Pyramid         | 5 | Non-Chelate       | N-Donor   |         |
| 521 | KOPRUC   | 643 | Discrete Molecule       | Seesaw                 | 4 | Chelate           | S-Donor   |         |
| 522 | KOWPUH   | 644 | Dimer Through Ligand    | Seesaw                 | 4 | Non-Chelate       | S-Donor   |         |
| 523 | KOXRAS   | 645 | Discrete Molecule       | Seesaw                 | 4 | Non-Chelate       | S-Donor   |         |
| 524 | KOZREY   | 646 | Tetramer Through Anion  | Trigonal               | 3 | Metal Halide Only | Chlorine  |         |
|     |          | 647 | Tetramer Through Anion  | Trigonal Bipyramid     | 5 | Chelate           | N-Donor   |         |
| 525 | KOZRIC   | 648 | Dimer Through Ligand    | Tetrahedral            | 4 | Chelate           | N-Donor   |         |
| 526 | KUCWAI   | 649 | Polymer Through Anion   | T-Shape                | 6 | Non-Chelate       | N-Donor   |         |
|     |          | 650 | Polymer Through Anion   | Square Pyramid         | 5 | Metal Halide Only | Chlorine  |         |
|     |          | 651 | Polymer Through Anion   | Tetrahedral            | 4 | Metal Halide Only | Chlorine  |         |
| 527 | KUCWUC   | 652 | Discrete Molecule       | T-Shape                | 6 | Non-Chelate       | N-Donor   |         |
| 528 | KUJVOB   | 653 | Discrete molecule       | T-Shape                | 5 | Chelate           | S-Donor   | N-Donor |
| 529 | KUJVUI   | 654 | Dimer Through Anion     | Square Pyramid         | 5 | Chelate           | N-Donor   |         |
|     |          | 655 | Dimer Through Anion     | Tetrahedral            | 4 | Metal Halide Only | Chlorine  |         |
| 530 | KUJWOD   | 656 | Polymer Through Anion   | D-Trigonal Bipyramid   | 5 | Chelate           | N-Donor   |         |
|     |          | 657 | Polymer Through Ligand  | Square Pyramid         | 5 | Metal Halide Only | Chlorine  |         |
| 531 | KUKNAF   | 658 | Dimer Through Anion     | Trigonal               | 3 | Metal to Metal    | Iridium   |         |
|     |          | 659 | Dimer Through Anion     | Tetrahedral            | 4 | Metal Halide Only | Chlorine  |         |
| 532 | KUSMAM   | 660 | Dimer Through Anion     | Tetrahedral            | 4 | Metal Halide Only | Chlorine  |         |
| 533 | LACCUP   | 661 | Polymer Through Ligand  | Seesaw                 | 4 | Non-Chelate       | N-Donor   |         |
| 534 | LACTEQ   | 662 | Polymer Through Anion   | D-Tetrahedral (Py)     | 4 | Non-Chelate       | N-Donor   |         |
| 535 | LACTEQ01 | 663 | Polymer Through Anion   | D-Tetrahedral (Py)     | 4 | Non-Chelate       | N-Donor   |         |
| 536 | LACVAO   | 664 | Polymer Through Anion   | Square Pyramid         | 5 | Non-Chelate       | N-Donor   | O-Donor |
| 537 | LAHDOO   | 665 | Dimer Through Anion     | D-Trigonal Bipyramid   | 5 | Non-Chelate       | M-M       | S-Donor |
| 538 | LAHFOQ   | 666 | Tetramer Through Ligand | D-Prism                | 6 | Non-Chelate       | M-M       | S-Donor |
|     |          | 667 | Tetramer Through Anion  | D-Prism                | 6 | Non-Chelate       | M-M       | S-Donor |

|     |          |     |                        |                      |   |                   |          |         |
|-----|----------|-----|------------------------|----------------------|---|-------------------|----------|---------|
| 539 | LAMLAO   | 668 | Discrete Molecule      | T-Shape              | 5 | Non-Chelate       | N-Donor  |         |
| 540 | LANDIP   | 669 | Polymer Through Anion  | Seesaw               | 4 | Metal Halide Only | O-Donor  |         |
| 541 | LAPKUI   | 670 | Discrete Molecule      | Tetrahedral          | 4 | Metal Halide Only | Chlorine |         |
| 542 | LARLAT   | 671 | Polymer Through Ligand | Seesaw               | 4 | Non-Chelate       | N-Donor  |         |
| 543 | LATXOV   | 672 | Discrete Molecule      | Tetrahedral          | 4 | Metal Halide Only | Chlorine |         |
| 544 | LAYWIR   | 673 | Dimer Through Anion    | D-Tetrahedral (Py)   | 4 | Non-Chelate       | N-Donor  |         |
| 545 | LEBVAQ   | 674 | Discrete Molecule      | D-Tetrahedral (Py)   | 4 | Non-Chelate       | N-Donor  |         |
| 546 | LEHMAO   | 675 | Discrete Molecule      | Seesaw               | 4 | Non-Chelate       | N-Donor  |         |
| 547 | LEKSEB   | 676 | Dimer Through Anion    | D-Trigonal Bipyramid | 5 | Chelate           | N-Donor  |         |
| 548 | LEKSEB01 | 677 | Discrete Molecule      | Seesaw               | 4 | Chelate           | N-Donor  |         |
|     |          | 678 | Dimer Through Anion    | T-Shape              | 5 | Chelate           | N-Donor  |         |
| 549 | LEKSOL   | 679 | Dimer Through Anion    | Square Pyramid       | 5 | Chelate           | N-Donor  |         |
| 550 | LEKSUR   | 680 | Dimer Through Anion    | D-Trigonal Bipyramid | 5 | Chelate           | N-Donor  |         |
| 551 | LEMPIC   | 681 | Polymer Through Anion  | D-Octahedral         | 6 | Non-Chelate       | S-Donor  | N-Donor |
| 552 | LEQLEA   | 682 | Dimer Through Anion    | Seesaw               | 4 | Metal Halide Only | Iodine   |         |
| 553 | LEQRIJ   | 683 | Discrete Molecule      | Seesaw               | 4 | Chelate           | N-Donor  |         |
| 554 | LEQROP   | 684 | Discrete Molecule      | Seesaw               | 4 | Chelate           | N-Donor  |         |
|     |          | 685 | Discrete Molecule      | Linear               | 2 | Metal Halide Only | Chlorine |         |
| 555 | LERFIZ   | 686 | Polymer Through Anion  | Seesaw               | 4 | Metal Halide Only | Chlorine |         |
|     |          | 687 | Polymer Through Anion  | Square Planar        | 4 | Metal Halide Only | Chlorine |         |
| 556 | LERSUY   | 688 | Discrete Molecule      | Seesaw               | 4 | Chelate           | N-Donor  |         |
| 557 | LEXBIA   | 689 | Dimer Through Anion    | D-Tetrahedral (Py)   | 4 | Non-Chelate       | S-Donor  |         |
| 558 | LEZDOJ   | 690 | Dimer Through Ligand   | T-Shape              | 6 | Chelate           | N-Donor  | O-Donor |
| 559 | LIDKIS   | 691 | Discrete Molecule      | Seesaw               | 4 | Chelate           | N-Donor  |         |
|     |          | 692 | Discrete Molecule      | Trigonal             | 3 | chelate           | N-Donor  |         |
| 560 | LILWEI   | 693 | Polymer Through Ligand | Seesaw               | 4 | Non-Chelate       | O-Donor  |         |
| 561 | LINXUD   | 694 | Polymer Through Ligand | Seesaw               | 4 | Non-Chelate       | N-Donor  |         |
| 562 | LITREL   | 695 | Discrete Molecule      | Square Pyramid       | 5 | Metal Halide Only | Chlorine |         |
| 563 | LITRIP   | 696 | Discrete Molecule      | Tetrahedral          | 4 | Metal Halide Only | Chlorine |         |
| 564 | LITRUB   | 697 | Polymer Through Anion  | Tetrahedral          | 4 | Metal Halide Only | Chlorine |         |
|     |          | 698 | Polymer Through Anion  | Seesaw               | 4 | Metal Halide Only | Chlorine |         |
| 565 | LITSAI   | 699 | Trimer Through Anion   | Trigonal Bipyramid   | 5 | Non-Chelate       | O-Donor  |         |
|     |          | 700 | Trimer Through Anion   | Trigonal Bipyramid   | 4 | Metal Halide Only | Chlorine |         |
|     |          | 701 | Dimer Through Anion    | Seesaw               | 4 | Metal Halide Only | Chlorine |         |
|     |          | 702 | Dimer Through Anion    | Trigonal             | 3 | Metal Halide Only | Chlorine |         |
| 566 | LITSEM   | 703 | Tetramer Through Anion | T-Shape              | 5 | Non-Chelate       | O-Donor  |         |
|     |          | 704 | Tetramer Through Anion | D-Octahedral         | 6 | Non-Chelate       | O-Donor  |         |
|     |          | 705 | Discrete Molecule      | Trigonal             | 3 | Metal Halide Only | Chlorine |         |
|     |          | 706 | Tetramer Through Anion | Seesaw               | 4 | Metal Halide Only | Chlorine |         |
|     |          | 707 | Discrete Molecule      | T-Shape              | 5 | Non-Chelate       | O-Donor  |         |
| 567 | LITSOW   | 708 | Dimer Through anion    | D-Tetrahedral (Py)   | 4 | Metal Halide Only | Iodine   |         |
| 568 | LIVCEY   | 709 | Discrete Molecule      | Seesaw               | 4 | Non-Chelate       | N-Donor  | O-Donor |
| 569 | LIYLAG   | 710 | Discrete Molecule      | T-Shape              | 6 | Non-Chelate       | S-Donor  | O-Donor |
| 570 | LOFFIV   | 711 | Tetramer Through Anion | Square Pyramid       | 5 | Metal Halide Only | Chlorine |         |
|     |          | 712 | Tetramer Through Anion | Trigonal Pyramid     | 4 | Metal Halide Only | Chlorine |         |
| 571 | LOFFOB   | 713 | Polymer Through Anion  | Tetrahedral          | 4 | Metal Halide Only | Chlorine |         |
| 572 | LOFFUH   | 714 | Polymer Through Anion  | Tetrahedral          | 4 | Metal Halide Only | Chlorine |         |
| 573 | LOVKAI   | 715 | Discrete Molecule      | D-Prism              | 4 | Non-Chelate       | C-Donor  |         |
| 574 | LOWGIP   | 716 | Polymer Through Ligand | Seesaw               | 4 | Non-Chelate       | S-Donor  |         |
| 575 | LOWJUE   | 717 | Polymer Through Anion  | Trigonal             | 3 | Non-Chelate       | C-Donor  |         |
|     |          | 718 | Polymer Through Ligand | Seesaw               | 4 | Metal Halide Only | Chlorine |         |
|     |          | 719 | Polymer Through Anion  | Tetrahedral          | 4 | Metal Halide Only | Chlorine |         |
| 576 | LOWKEP   | 720 | Discrete Molecule      | Seesaw               | 4 | Non-Chelate       | C-Donor  |         |
| 577 | LOWKIT   | 721 | Dimer Through Anion    | Seesaw               | 4 | Non-Chelate       | C-Donor  |         |
|     |          | 722 | Dimer Through Anion    | Tetrahedral          | 4 | Metal Halide Only | Chlorine |         |
| 578 | LOYBEG   | 723 | Polymer Through Anion  | Octahedral           | 6 | Metal Halide Only | Chlorine |         |
| 579 | LUHDID   | 724 | Polymer Through Anion  | Tetrahedral          | 4 | Metal Halide Only | Chlorine |         |
| 580 | LUJNIP   | 725 | Discrete Molecule      | T-Shape              | 5 | Non-Chelate       | M-M      | O-Donor |
| 581 | LUKYAS   | 726 | Polymer Through Ligand | Square Pyramid       | 5 | Non-Chelate       | N-Donor  |         |
|     |          | 727 | Polymer Through Anion  | Tetrahedral          | 4 | Metal Halide Only | Chlorine |         |
|     |          | 728 | Polymer Through Anion  | T-Shape              | 3 | Metal Halide Only | Chlorine |         |
| 582 | MARRAY   | 729 | Discrete Molecule      | Seesaw               | 4 | Non-Chelate       | S-Donor  |         |



|     |          |     |                         |                        |   |                   |           |         |           |
|-----|----------|-----|-------------------------|------------------------|---|-------------------|-----------|---------|-----------|
| 583 | MCOLID   | 730 | Polymer Through Anion   | Trigonal Bipyramid     | 5 | Non-Chelate       | N-Donor   |         |           |
| 584 | MCYTHG   | 731 | Dimer Through Anion     | D-Square Pyramid       | 5 | Chelate           | N-Donor   | O-Donor |           |
| 585 | MEFYEC   | 732 | Polymer Through Anion   | D-Square Pyramid       | 5 | Chelate           | N-Donor   |         |           |
| 586 | MEPHGC10 | 733 | Dimer Through Anion     | D-Tetrahedral (Py)     | 4 | Non-Chelate       | P-Donor   |         |           |
|     |          | 734 | Dimer Through Anion     | Seesaw                 | 4 | Non-Chelate       | P-Donor   |         |           |
| 587 | MEPYHG   | 735 | Polymer Through Ligand  | Seesaw                 | 4 | Non-Chelate       | O-Donor   |         |           |
| 588 | MESFLV03 | 736 | Dimer Through Anion     | Tetrahedral            | 4 | Metal Halide Only | Chlorine  |         |           |
| 589 | MESFLV10 | 737 | Dimer Through Anion     | Tetrahedral            | 4 | Metal Halide Only | Chlorine  |         |           |
| 590 | METHGD   | 738 | Polymer Through Anion   | Square Pyramid         | 5 | Non-Chelate       | S-Donor   |         |           |
|     |          | 739 | Polymer Through Ligand  | Square Pyramid         | 5 | Non-Chelate       | S-Donor   |         |           |
| 591 | MIDZEF   | 740 | Polymer Through Anion   | D-Tetrahedral (Py)     | 4 | Non-Chelate       | N-Donor   |         |           |
|     |          | 741 | Polymer Through Ligand  | D-Tetrahedral (Py)     | 4 | Non-Chelate       | N-Donor   |         |           |
| 592 | MIHBAH   | 742 | Discrete Molecule       | Tetrahedral            | 4 | Metal Halide Only | Chlorine  |         |           |
| 593 | MIHBIP   | 743 | Discrete Molecule       | Tetrahedral            | 4 | Metal Halide Only | Chlorine  |         |           |
| 594 | MIHBOV   | 744 | Discrete Molecule       | Tetrahedral            | 4 | Metal Halide Only | Chlorine  |         |           |
| 595 | MIMJAT   | 745 | Dimer Through Anion     | Square Pyramid         | 4 | Non-Chelate       | C-Donor   | N-Donor |           |
|     |          | 746 | Discrete Molecule       | Trigonal               | 3 | Non-Chelate       | N-Donor   |         |           |
| 596 | MIWJEI   | 747 | Discrete Molecule       | Tetrahedral            | 4 | Metal Halide Only | Chlorine  |         |           |
| 597 | MIZYOL   | 748 | Tetramer Through Ligand | Seesaw                 | 4 | Non-Chelate       | M-M       | O-Donor | Tellurium |
| 598 | MIZYUR   | 749 | Tetramer Through Ligand | Trigonal Pyramid       | 4 | Non-Chelate       | M-M       | O-Donor | Tellurium |
|     |          | 750 | Tetramer Through Anion  | Pentagonal Pyramid     | 6 | Metal to Metal    | Tellurium |         |           |
| 599 | MOFXIP   | 751 | Dimer Through Anion     | Tetrahedral            | 4 | Metal Halide Only | Chlorine  |         |           |
| 600 | MOKTAI   | 752 | Polymer Through Ligand  | Seesaw                 | 4 | Non-Chelate       | N-Donor   |         |           |
| 601 | MOWFOU   | 753 | Polymer Through Anion   | D-Octahedral           | 6 | Non-Chelate       | N-Donor   |         |           |
| 602 | MPHGCL10 | 754 | Dimer Through Anion     | D-Tetrahedral (Py)     | 4 | Non-Chelate       | P-Donor   |         |           |
| 603 | MTEGMC   | 755 | Discrete Molecule       | D-Pentagonal Bipyramid | 7 | Non-Chelate       | O-Donor   |         |           |
| 604 | MUKWUM   | 756 | Dimer Through Anion     | D-Tetrahedral (Py)     | 4 | Non-Chelate       | S-Donor   |         |           |
| 605 | MUKXAT   | 757 | Polymer Through Anion   | D-Tetrahedral (Py)     | 4 | Non-Chelate       | S-Donor   |         |           |
| 606 | MUMDAB   | 758 | Discrete Molecule       | Trigonal               | 3 | Non-Chelate       | O-Donor   |         |           |
| 607 | MUSHOZ   | 759 | Discrete Molecule       | Seesaw                 | 4 | Chelate           | N-Donor   |         |           |
| 608 | MUYNAV   | 760 | Discrete Molecule       | Tetrahedral            | 4 | Metal Halide Only | Chlorine  |         |           |
| 609 | NACCOK   | 761 | Discrete Molecule       | Tetrahedral            | 4 | Metal Halide Only | Chlorine  |         |           |
| 610 | NAKGOX   | 762 | Discrete Molecule       | Seesaw                 | 4 | Non-Chelate       | S-Donor   |         |           |
| 611 | NAQQOL   | 763 | Discrete Molecule       | Seesaw                 | 4 | Non-Chelate       | S-Donor   |         |           |
| 612 | NAVPIK   | 764 | Polymer Through Ligand  | D-Octahedral           | 6 | Non-Chelate       | O-Donor   |         |           |
| 613 | NAVRIL   | 765 | Tetramer Through Anion  | Seesaw                 | 4 | Non-Chelate       | Silicon   |         |           |
|     |          | 766 | Tetramer Through Anion  | Trigonal               | 3 | Non-Chelate       | Silicon   |         |           |
| 614 | NAXVUE   | 767 | Polymer Through Ligand  | D-Tetrahedral (Py)     | 4 | Non-Chelate       | S-Donor   |         |           |
| 615 | NAYJIH   | 768 | Polymer Through Anion   | Trigonal Bipyramid     | 5 | Metal Halide Only | Chlorine  |         |           |
| 616 | NBUPHG10 | 769 | Dimer Through Anion     | D-Tetrahedral (Py)     | 4 | Non-Chelate       | P-Donor   |         |           |
| 617 | NEBCAA   | 770 | Discrete Molecule       | T-Shape                | 5 | Chelate           | N-Donor   | S-Donor |           |
| 618 | NEFKUE   | 771 | Dimer Through Ligand    | T-Shape                | 5 | Chelate           | O-Donor   |         |           |
| 619 | NEFLEP   | 772 | Dimer Through Anion     | D-Square Pyramid       | 5 | Chelate           | O-Donor   |         |           |
| 620 | NEHQUM01 | 773 | Tetramer Through Ligand | Seesaw                 | 4 | Non-Chelate       | O-Donor   |         |           |
|     |          | 774 | Tetramer Through Ligand | T-Shape                | 5 | Non-Chelate       | O-Donor   |         |           |
| 621 | NEKNUM   | 775 | Dimer Through Anion     | Seesaw                 | 4 | Non-Chelate       | P-Donor   |         |           |
| 622 | NEPFOE   | 776 | Polymer Through Anion   | Seesaw                 | 4 | Non-Chelate       | N-Donor   |         |           |
|     |          | 777 | Polymer Through Ligand  | T-Shape                | 5 | Non-Chelate       | N-Donor   |         |           |
| 623 | NESWUD   | 778 | Dimer Through Anion     | D-Tetrahedral (Py)     | 4 | Non-Chelate       | P-Donor   |         |           |
| 624 | NETGOJ   | 779 | Polymer Through Ligand  | Seesaw                 | 4 | Non-Chelate       | N-Donor   |         |           |
| 625 | NETGUO   | 780 | Discrete Molecule       | Seesaw                 | 4 | Non-Chelate       | N-Donor   |         |           |
| 626 | NETHAW   | 781 | Polymer Through Ligand  | Seesaw                 | 4 | Non-Chelate       | N-Donor   |         |           |
| 627 | NEVQAH   | 782 | Discrete Molecule       | Tetrahedral            | 4 | Metal Halide Only | Chlorine  |         |           |
| 628 | NEWBEX   | 783 | Discrete Molecule       | Trigonal Pyramid       | 4 | Metal Halide Only | Chlorine  |         |           |
| 629 | NEWKAC   | 784 | Dimer Through Ligand    | Seesaw                 | 4 | Chelate           | N-Donor   |         |           |
| 630 | NEWRUE   | 785 | Polymer Through Ligand  | Square Pyramid         | 5 | Non-Chelate       | O-Donor   | N-Donor |           |
|     |          | 786 | Polymer Through Anion   | Square Pyramid         | 5 | Non-Chelate       | O-Donor   | N-Donor |           |
| 631 | NIDWIG   | 787 | Discrete Molecule       | Seesaw                 | 4 | Chelate           | P-Donor   |         |           |
| 632 | NIMDUJ   | 788 | Discrete Molecule       | Tetrahedral            | 4 | Metal Halide Only | Chlorine  |         |           |
| 633 | NIMFAR   | 789 | Discrete Molecule       | Tetrahedral            | 4 | Metal Halide Only | Chlorine  |         |           |
| 634 | NIMFEV   | 790 | Discrete Molecule       | D-Octahedral           | 6 | Non-Chelate       | O-Donor   |         |           |
|     |          | 791 | Dimer Through Anion     | Tetrahedral            | 4 | Metal Halide Only | Chlorine  |         |           |
| 635 | NIMFOF   | 792 | Polymer Through Anion   | Square Pyramid         | 5 | Metal Halide Only | Chlorine  |         |           |

|     |          |     |                         |                        |   |                   |     |          |          |      |
|-----|----------|-----|-------------------------|------------------------|---|-------------------|-----|----------|----------|------|
| 636 | NINDOE   | 793 | Tetramer Through Anion  | Square Pyramid         | 5 | Non-Chelate       |     | N-Donor  |          |      |
|     |          | 794 | Tetramer Through Anion  | Seesaw                 | 4 | Non-Chelate       |     | N-Donor  |          |      |
| 637 | NIRQAG   | 795 | Polymer Through Anion   | Seesaw                 | 4 | Non-Chelate       |     | S-Donor  | O-Donor  |      |
|     |          | 796 | Polymer Through Ligand  | D-Octahedral           | 6 | Non-Chelate       |     | S-Donor  | O-Donor  |      |
| 638 | NITZUL   | 797 | Discrete Molecule       | D-Pentagonal Bipyramid | 7 | Non-Chelate       | M-M | N-Donor  | C-Donor  | Iron |
| 639 | NODZIP   | 798 | Dimer Through Anion     | Tetrahedral            | 4 | Metal Halide Only |     | Chlorine |          |      |
| 640 | NOFPAZ   | 799 | Dimer Through Anion     | D-Tetrahedral (Py)     | 4 | Non-Chelate       |     | S-Donor  |          |      |
| 641 | NOJZOD   | 800 | Discrete Molecule       | Tetrahedral            | 4 | Metal Halide Only |     | Chlorine |          |      |
| 642 | NOKCOF   | 801 | Dimer Through Ligand    | Seesaw                 | 4 | Non-Chelate       |     | S-Donor  |          |      |
| 643 | NOMSEO   | 802 | Discrete Molecule       | T-Shape                | 5 | Non-Chelate       | M-M | Iodine   | Platinum |      |
| 644 | NOQVUK   | 803 | Discrete Molecule       | Seesaw                 | 4 | Non-Chelate       |     | S-Donor  |          |      |
| 645 | NUMJUA   | 804 | Dimer Through Anion     | Tetrahedral            | 4 | Metal Halide Only |     | Chlorine |          |      |
| 646 | NUMKAH   | 805 | Discrete Molecule       | Tetrahedral            | 4 | Metal Halide Only |     | Chlorine |          |      |
| 647 | NUXWEJ   | 806 | Dimer Through Ligand    | Seesaw                 | 4 | Chelate           |     | S-Donor  |          |      |
| 648 | OCODAM   | 807 | Discrete Molecule       | Seesaw                 | 4 | Non-Chelate       |     | P-Donor  |          |      |
| 649 | OCODEQ   | 808 | Dimer Through Anion     | D-Tetrahedral (Py)     | 4 | Non-Chelate       |     | P-Donor  |          |      |
| 650 | ODIPAT   | 809 | Dimer Through Anion     | D-Tetrahedral (Py)     | 4 | Non-Chelate       |     | C-Donor  |          |      |
| 651 | ODITIF   | 810 | Polymer Through Anion   | D-Tetrahedral (Py)     | 4 | Non-Chelate       |     | N-Donor  |          |      |
|     |          | 811 | Polymer Through Anion   | Square Pyramid         | 5 | Non-Chelate       |     | N-Donor  |          |      |
| 652 | ODIWEF   | 812 | Dimer Through Anion     | D-Tetrahedral (Py)     | 4 | Non-Chelate       |     | P-Donor  |          |      |
| 653 | ODUMOQ   | 813 | Dimer Through Ligand    | Seesaw                 | 4 | Non-Chelate       |     | N-Donor  |          |      |
| 654 | OFOLAY   | 814 | Discrete Molecule       | Tetrahedral            | 4 | Metal Halide Only |     | Chlorine |          |      |
| 655 | OGAROF   | 815 | Discrete Molecule       | Seesaw                 | 4 | Chelate           |     | S-Donor  |          |      |
| 656 | OHURAM   | 816 | Oligomer Through Anion  | Trigonal Pyramid       | 4 | Metal Halide Only |     | Chlorine |          |      |
|     |          | 817 | Oligomer Through Anion  | Trigonal Bipyramid     | 5 | Metal Halide Only |     | Chlorine |          |      |
|     |          | 818 | Oligomer Through Anion  | Square Pyramid         | 5 | Metal Halide Only |     | Chlorine |          |      |
| 657 | OKAJOZ   | 819 | Discrete Molecule       | Linear                 | 2 | Metal Halide Only |     | Chlorine |          |      |
| 658 | OKOWUG   | 820 | Discrete Molecule       | Seesaw                 | 4 | Non-Chelate       |     | S-Donor  |          |      |
| 659 | OLAGAJ   | 821 | Tetramer Through Ligand | Seesaw                 | 4 | Non-Chelate       |     | N-Donor  |          |      |
| 660 | OLAGEN   | 822 | Tetramer Through Ligand | Seesaw                 | 4 | Non-Chelate       |     | N-Donor  |          |      |
| 661 | OMEXEL   | 823 | Discrete Molecule       | Tetrahedral            | 4 | Metal Halide Only |     | Chlorine |          |      |
| 662 | OMIKIG   | 824 | Discrete Molecule       | Tetrahedral            | 4 | Metal Halide Only |     | Chlorine |          |      |
| 663 | ONINIK   | 825 | Discrete Molecule       | Seesaw                 | 4 | Non-Chelate       |     | N-Donor  |          |      |
| 664 | ONINUW   | 826 | Discrete Molecule       | Seesaw                 | 4 | Non-Chelate       |     | N-Donor  |          |      |
| 665 | ONOFAZ   | 827 | Discrete Molecule       | T-Shape                | 5 | Chelate           |     | O-Donor  | N-Donor  |      |
| 666 | OPUYUU   | 828 | Polymer Through Ligand  | Seesaw                 | 4 | Chelate           |     | N-Donor  |          |      |
|     |          | 829 | Polymer Through Anion   | Square Planar          | 4 | Metal Halide Only |     | Chlorine |          |      |
| 667 | OQIDOI   | 830 | Discrete Molecule       | Seesaw                 | 4 | Non-Chelate       |     | N-Donor  |          |      |
| 668 | OROQOC   | 831 | Dimer Through Anion     | D-Tetrahedral (Py)     | 4 | Non-Chelate       |     | N-Donor  |          |      |
| 669 | OROQUI   | 832 | Dimer Through Anion     | D-Trigonal Bipyramid   | 5 | Non-Chelate       |     | N-Donor  |          |      |
|     |          | 833 | Dimer Through Anion     | Tetrahedral            | 4 | Metal Halide Only |     | Chlorine |          |      |
| 670 | OTPCHG   | 834 | Dimer Through Anion     | Seesaw                 | 4 | Non-Chelate       |     | P-Donor  | O-Donor  |      |
| 671 | OVEFIF   | 835 | Polymer through ligand  | T-Shape                | 5 | Non-Chelate       |     | N-Donor  |          |      |
| 672 | OWUGIX   | 836 | Discrete Molecule       | Tetrahedral            | 4 | Metal Halide Only |     | Chlorine |          |      |
| 673 | OWUGOD   | 837 | Dimer Through Anion     | Tetrahedral            | 4 | Metal Halide Only |     | Chlorine |          |      |
| 674 | OXTETH10 | 838 | Discrete Molecule       | T-Shape                | 5 | Non-Chelate       |     | O-Donor  |          |      |
| 675 | PAFRIZ   | 839 | Tetramer Through Anion  | Seesaw                 | 4 | Chelate           |     | N-Donor  |          |      |
|     |          | 840 | Tetramer Through Ligand | T-Shape                | 5 | Chelate           |     | N-Donor  |          |      |
| 676 | PAHNUH   | 841 | Trimer Through Ligand   | Trigonal               | 3 | Chelate           |     | O-Donor  |          |      |
|     |          | 842 | Trimer Through Ligand   | Seesaw                 | 4 | Chelate           |     | O-Donor  |          |      |
| 677 | PANCIR   | 843 | Discrete Molecule       | Seesaw                 | 4 | Chelate           |     | N-Donor  |          |      |
| 678 | PASCHI   | 844 | Tetramer Through Anion  | Trigonal               | 3 | Metal to Metal    |     | Iron     |          |      |
|     |          | 845 | Tetramer Through Ligand | D-Tetrahedral (Py)     | 4 | Metal to Metal    |     | Iron     |          |      |
| 679 | PATJUP   | 846 | Tetramer Through Ligand | Seesaw                 | 4 | Non-Chelate       |     | S-Donor  |          |      |
| 680 | PATJUP10 | 847 | Tetramer Through Ligand | Seesaw                 | 4 | Non-Chelate       |     | S-Donor  |          |      |
| 681 | PAVSUA   | 848 | Oligomer Through Ligand | Seesaw                 | 4 | Non-Chelate       | M-M | P-Donor  | Iron     |      |
| 682 | PAVTAH   | 849 | Oligomer Through Ligand | Seesaw                 | 4 | Non-Chelate       | M-M | P-Donor  | Iron     |      |
| 683 | PAVTOV   | 850 | Oligomer Through Ligand | Seesaw                 | 4 | Non-Chelate       | M-M | P-Donor  | Iron     |      |
| 684 | PAVTUB   | 851 | Oligomer Through Ligand | Seesaw                 | 4 | Non-Chelate       | M-M | P-Donor  | Iron     |      |
| 685 | PAYCOJ   | 852 | Discrete Molecule       | Tetrahedral            | 4 | Metal Halide Only |     | Chlorine |          |      |
| 686 | PEHWEE   | 853 | Discrete Molecule       | Trigonal               | 3 | Non-Chelate       |     | O-Donor  |          |      |
|     |          | 854 | Polymer Through Anion   | Tetrahedral            | 4 | Metal Halide Only |     | Chlorine |          |      |
| 687 | PEHYOQ   | 855 | Discrete Molecule       | Tetrahedral            | 4 | Metal Halide Only |     | Chlorine |          |      |

|     |          |     |                         |                        |   |                   |     |          |          |
|-----|----------|-----|-------------------------|------------------------|---|-------------------|-----|----------|----------|
| 688 | PEJYEI   | 856 | Dimer Through Anion     | D-Trigonal Bipyramid   | 5 | Chelate           | M-M | N-Donor  | Platinum |
| 689 | PEQVIR   | 857 | Polymer Through Ligand  | Seesaw                 | 4 | Non-Chelate       |     | N-Donor  |          |
|     |          | 858 | Polymer Through Anion   | Seesaw                 | 4 | Non-Chelate       |     | N-Donor  |          |
| 690 | PERLOL   | 859 | Discrete Molecule       | Tetrahedral            | 4 | Metal Halide Only |     | Chlorine |          |
| 691 | PETXOC   | 860 | Trimer Through Anion    | Square Pyramid         | 5 | Metal Halide Only |     | Chlorine |          |
|     |          | 861 | Trimer Through Anion    | Tetrahedral            | 4 | Metal Halide Only |     | Chlorine |          |
|     |          | 862 | Trimer Through Anion    | Seesaw                 | 4 | Chelate           |     | N-Donor  |          |
| 692 | PETXUI   | 863 | Polymer Through Anion   | Trigonal Bipyramid     | 5 | Chelate           |     | N-Donor  |          |
| 693 | PEWVAO   | 864 | Polymer Through Anion   | Square Pyramid         | 5 | Non-Chelate       |     | N-Donor  |          |
| 694 | PEWVES   | 865 | Discrete Molecule       | Linear                 | 2 | Metal Halide Only |     | Chlorine |          |
|     |          | 866 | Polymer Through Anion   | D-Tetrahedral (Py)     | 4 | Non-Chelate       |     | N-Donor  |          |
| 695 | PEYKIP   | 867 | Dimer Through Anion     | Tetrahedral            | 4 | Metal Halide Only |     | Chlorine |          |
| 696 | PEYKIP01 | 868 | Dimer Through Anion     | Tetrahedral            | 4 | Metal Halide Only |     | Chlorine |          |
| 697 | PIDCIO   | 869 | Trimer Through Anion    | Seesaw                 | 4 | Metal Halide Only |     | Chlorine |          |
|     |          | 870 | Trimer Through Anion    | Tetrahedral            | 4 | Metal Halide Only |     | Chlorine |          |
| 698 | PIFXIN   | 871 | Discrete Molecule       | Tetrahedral            | 4 | Metal Halide Only |     | Chlorine |          |
| 699 | PIGQED   | 872 | Dimer Through Anion     | D-Trigonal Bipyramid   | 5 | Non-Chelate       |     | N-Donor  |          |
| 700 | PIHCAL   | 873 | Polymer Through Ligand  | Seesaw                 | 4 | Non-Chelate       |     | N-Donor  |          |
| 701 | PIHPON   | 874 | Polymer Through Ligand  | Seesaw                 | 4 | Non-Chelate       |     | N-Donor  |          |
| 702 | PIWGOT   | 875 | Discrete Molecule       | T-Shape                | 5 | Chelate           |     | N-Donor  |          |
| 703 | PIXWAV   | 876 | Discrete Molecule       | T-Shape                | 5 | Chelate           |     | N-Donor  |          |
| 704 | PIXWEZ   | 877 | Discrete Molecule       | Seesaw                 | 4 | Chelate           |     | N-Donor  |          |
| 705 | PIZLUH   | 878 | Oligomer Through Anion  | Trigonal Pyramid       | 3 | Non-Chelate       |     | C-donor  |          |
|     |          | 879 | Oligomer Through Anion  | Trigonal               | 3 | Non-Chelate       |     | N-Donor  |          |
|     |          | 880 | Oligomer Through Ligand | D-Square Planar        | 4 | Metal Halide Only |     | Chlorine |          |
| 706 | POCVIO   | 881 | Discrete Molecule       | D-Octahedral           | 6 | Non-Chelate       |     | N-Donor  |          |
| 707 | PODWIO   | 882 | Discrete Molecule       | D-Pentagonal Bipyramid | 7 | Chelate           |     | O-Donor  |          |
| 708 | POLLAD   | 883 | Polymer Through Anion   | Trigonal Bipyramid     | 5 | Chelate           |     | O-Donor  |          |
|     |          | 884 | Polymer Through Anion   | Seesaw                 | 4 | Chelate           |     | O-Donor  |          |
| 709 | POMCID   | 885 | Dimer Through Anion     | Tetrahedral            | 4 | Metal Halide Only |     | Chlorine |          |
| 710 | POMKAE   | 886 | Discrete Molecule       | Seesaw                 | 4 | Chelate           |     | N-Donor  |          |
| 711 | POMKAE01 | 887 | Discrete Molecule       | Seesaw                 | 4 | Chelate           |     | N-Donor  |          |
| 712 | POMKOS   | 888 | Dimer Through Ligand    | Seesaw                 | 4 | Non-Chelate       |     | N-Donor  |          |
| 713 | POMQOY   | 889 | Discrete Molecule       | Seesaw                 | 4 | Chelate           |     | N-Donor  |          |
| 714 | PONHEG   | 890 | Dimer Through Anion     | Tetrahedral            | 4 | Metal Halide Only |     | Chlorine |          |
| 715 | PONWEU   | 891 | Polymer Through Anion   | D-Octahedral           | 6 | Chelate           |     | O-Donor  | N-Donor  |
| 716 | POPCUS   | 892 | Polymer Through Anion   | Square Pyramid         | 5 | Chelate           |     | O-Donor  | N-Donor  |
| 717 | POPDON   | 893 | Dimer Through Anion     | Square Pyramid         | 5 | Chelate           |     | O-Donor  | N-Donor  |
| 718 | POPDUT   | 894 | Tetramer Through Anion  | Square Pyramid         | 5 | Chelate           |     | O-Donor  | N-Donor  |
| 719 | PORLOY   | 895 | Discrete Molecule       | Seesaw                 | 4 | Chelate           |     | P-Donor  | C-Donor  |
| 720 | POTGAG   | 896 | Dimer Through Anion     | Tetrahedral            | 4 | Metal Halide Only |     | Chlorine |          |
| 721 | POWQUO   | 897 | Discrete Molecule       | Seesaw                 | 4 | Chelate           |     | N-Donor  |          |
| 722 | POZWAE   | 898 | Discrete Molecule       | D-Trigonal Bipyramid   | 5 | Chelate           | M-M | P-Donor  | Mercury  |
| 723 | POZZEL   | 899 | Dimer Through Anion     | D-Tetrahedral (Py)     | 4 | Non-Chelate       |     | P-Donor  |          |
| 724 | PTUMHG   | 900 | Discrete Molecule       | Tetrahedral            | 4 | Metal Halide Only |     | Chlorine |          |
| 725 | PUBBIZ   | 901 | Dimer Through Anion     | Tetrahedral            | 4 | Metal Halide Only |     | Chlorine |          |
| 726 | PUKJAG   | 902 | Dimer Through Anion     | Tetrahedral            | 4 | Metal Halide Only |     | Chlorine |          |
| 727 | PUKZEA   | 903 | Dimer Through Anion     | Tetrahedral            | 4 | Metal Halide Only |     | Chlorine |          |
| 728 | PUNJEP   | 904 | Discrete Molecule       | Seesaw                 | 4 | Non-Chelate       |     | S-Donor  |          |
| 729 | PURGIS   | 905 | Dimer Through Ligand    | Seesaw                 | 3 | Metal to Metal    |     | Iridium  |          |
|     |          | 906 | Dimer Through Ligand    | Trigonal               | 4 | Chelate           |     | N-Donor  |          |
| 730 | PUSWUX   | 907 | Discrete Molecule       | Seesaw                 | 4 | Chelate           |     | N-Donor  |          |
| 731 | PUTKOG   | 908 | Discrete Molecule       | Seesaw                 | 4 | Chelate           |     | N-Donor  |          |
| 732 | PUTKUM   | 909 | Discrete Molecule       | Seesaw                 | 4 | Chelate           |     | N-Donor  |          |
| 733 | PUVLUN   | 910 | Polymer Through Anion   | Octahedral             | 6 | Metal Halide Only |     | Chlorine |          |
| 734 | PUVTEH   | 911 | Discrete Molecule       | Tetrahedral            | 4 | Metal Halide Only |     | Chlorine |          |
| 735 | PYDSHG   | 912 | Polymer Through Ligand  | Seesaw                 | 4 | Non-Chelate       |     | N-Donor  |          |
| 736 | PYNOHG   | 913 | Dimer Through Ligand    | Seesaw                 | 4 | Chelate           |     | O-Donor  |          |
| 737 | QABSUK   | 914 | Discrete Molecule       | D-Trigonal Bipyramid   | 5 | Non-Chelate       |     | N-donor  | O-Donor  |
| 738 | QAHRIC   | 915 | Discrete Molecule       | Square Pyramid         | 5 | Chelate           |     | N-Donor  |          |
|     |          | 916 | Discrete Molecule       | Linear                 | 2 | Metal Halide Only |     | Chlorine |          |
| 739 | QAPTEI   | 917 | Discrete Molecule       | T-Shape                | 5 | Non-Chelate       |     | N-Donor  |          |

|     |          |     |                        |                      |   |                   |          |         |
|-----|----------|-----|------------------------|----------------------|---|-------------------|----------|---------|
| 740 | QARNED   | 918 | Discrete Molecule      | T-Shape              | 6 | Non-Chelate       | O-Donor  | N-Donor |
| 741 | QAVVIU   | 919 | Polymer Through Anion  | Tetrahedral          | 4 | Metal Halide Only | Chlorine |         |
| 742 | QAYTIT   | 920 | Discrete Molecule      | Tetrahedral          | 4 | Metal Halide Only | Chlorine |         |
| 743 | QAYZEV   | 921 | Dimer Through Anion    | Seesaw               | 4 | Non-Chelate       | S-Donor  |         |
|     |          | 922 | Dimer Through Anion    | Seesaw               | 4 | Non-Chelate       | P-Donor  |         |
| 744 | QEJSOP   | 923 | Trimer Through Anion   | D-Tetrahedral (Py)   | 4 | Non-Chelate       | N-Donor  |         |
|     |          | 924 | Trimer Through Anion   | D-Octahedral         | 6 | Non-Chelate       | N-Donor  |         |
| 745 | QEJZOU   | 925 | Discrete Molecule      | Tetrahedral          | 4 | Metal Halide Only | Chlorine |         |
| 746 | QEKJAR   | 926 | Dimer Through Anion    | D-Square Pyramid     | 5 | Non-Chelate       | N-Donor  |         |
| 747 | QEPTIO   | 927 | Dimer Through Anion    | Tetrahedral          | 4 | Metal Halide Only | Chlorine |         |
| 748 | QEPYIU   | 928 | Polymer Through Ligand | Seesaw               | 4 | Non-Chelate       | N-Donor  |         |
|     |          | 929 | Polymer Through Anion  | Seesaw               | 4 | Non-Chelate       | N-Donor  |         |
| 749 | QEPYUG   | 930 | Polymer Through Ligand | Seesaw               | 4 | Non-Chelate       | N-Donor  |         |
|     |          | 931 | Polymer Through Anion  | Seesaw               | 4 | Non-Chelate       | N-Donor  |         |
| 750 | QEVHUU   | 932 | Oligomer Through Anion | Trigonal             | 3 | Metal Halide Only | Chlorine |         |
|     |          | 933 | Oligomer Through Anion | Square Pyramid       | 4 | Metal to Metal    | Iron     |         |
|     |          | 934 | Oligomer Through Anion | Seesaw               | 4 | Metal Halide Only | Chlorine |         |
| 751 | QEYBUR   | 935 | Dimer Through Ligand   | T-Shape              | 5 | Non-Chelate       | O-Donor  |         |
| 752 | QEZNIU   | 936 | Polymer through ligand | Seesaw               | 4 | Non-Chelate       | O-Donor  | N-Donor |
| 753 | QEZNOA   | 937 | Polymer Through Anion  | Square Pyramid       | 5 | Non-Chelate       | N-Donor  |         |
| 754 | QEZNUG   | 938 | Polymer Through Ligand | Seesaw               | 4 | Non-Chelate       | O-Donor  | N-Donor |
| 755 | QEZPAO   | 939 | Polymer Through Ligand | Seesaw               | 4 | Non-Chelate       | O-Donor  | N-Donor |
| 756 | QIQXAR   | 940 | Discrete Molecule      | Seesaw               | 4 | Chelate           | P-Donor  |         |
| 757 | QIRZIC   | 941 | Dimer Through Anion    | Tetrahedral          | 4 | Metal Halide Only | Chlorine |         |
| 758 | QISVIX   | 942 | Dimer Through Anion    | D-Tetrahedral (Py)   | 4 | Non-Chelate       | S-Donor  |         |
| 759 | QIVXAV   | 943 | Polymer Through Anion  | D-Tetrahedral (Py)   | 4 | Non-Chelate       | N-Donor  |         |
|     |          | 944 | Polymer Through Ligand | Square Pyramid       | 5 | Non-Chelate       | N-Donor  |         |
| 760 | QIXGUA   | 945 | Dimer Through Ligand   | T-Shape              | 5 | Non-Chelate       | N-Donor  |         |
| 761 | QIZRUO   | 946 | Dimer Through Anion    | Seesaw               | 4 | Non-Chelate       | P-Donor  |         |
|     |          | 947 | Dimer Through Anion    | Tetrahedral          | 4 | Metal Halide Only | Chlorine |         |
| 762 | QOJMUY   | 948 | Discrete Molecule      | Tetrahedral          | 4 | Metal Halide Only | Chlorine |         |
| 763 | QOLGUU   | 949 | Polymer Through Anion  | Tetrahedral          | 4 | Metal Halide Only | Chlorine |         |
|     |          | 950 | Polymer Through Anion  | Trigonal Pyramid     | 4 | Metal Halide Only | Chlorine |         |
| 764 | QONGEG   | 951 | Dimer Through Anion    | Seesaw               | 4 | Non-Chelate       | S-Donor  |         |
|     |          | 952 | Dimer Through Anion    | Tetrahedral          | 4 | Metal Halide Only | Chlorine |         |
| 765 | QOPGUY   | 953 | Discrete Molecule      | Seesaw               | 4 | Chelate           | N-Donor  |         |
| 766 | QOQCII   | 954 | Polymer Through Anion  | T-Shape              | 5 | Non-Chelate       | S-Donor  |         |
|     |          | 955 | Polymer Through Anion  | Tetrahedral          | 4 | Metal Halide Only | Chlorine |         |
|     |          | 956 | Polymer Through Anion  | Seesaw               | 4 | Non-Chelate       | S-Donor  |         |
| 767 | QORKIT   | 957 | Discrete Molecule      | Seesaw               | 4 | Chelate           | N-Donor  |         |
| 768 | QQQBVJ03 | 958 | Trimer Through Anion   | Seesaw               | 4 | Metal Halide Only | Chlorine |         |
|     |          | 959 | Trimer Through Anion   | Trigonal             | 3 | Metal Halide Only | Chlorine |         |
| 769 | QQQBVJ04 | 960 | Polymer Through Anion  | Tetrahedral          | 4 | Metal Halide Only | Chlorine |         |
| 770 | QQQBVJ21 | 961 | Polymer Through Anion  | Seesaw               | 4 | Metal Halide Only | Chlorine |         |
| 771 | QQQBVJ31 | 962 | Polymer Through Anion  | Seesaw               | 4 | Metal Halide Only | Chlorine |         |
| 772 | QULQEV   | 963 | Discrete Molecule      | Seesaw               | 4 | Non-Chelate       | N-Donor  |         |
| 773 | QUMSIA   | 964 | Discrete Molecule      | Square Planar        | 4 | Non-Chelate       | O-Donor  |         |
| 774 | QUMVIE   | 965 | Polymer Through Anion  | Square Pyramid       | 5 | Non-Chelate       | N-Donor  |         |
| 775 | QUVWIP   | 966 | Polymer Through Anion  | Trigonal Bipyramid   | 5 | Non-Chelate       | N-Donor  |         |
| 776 | QUVXEM   | 967 | Polymer Through Anion  | Square Pyramid       | 5 | Non-Chelate       | N-Donor  |         |
| 777 | QUVZOY   | 968 | Polymer Through Anion  | Trigonal Bipyramid   | 5 | Non-Chelate       | N-Donor  |         |
| 778 | QUZDUM   | 969 | Polymer Through Ligand | D-Octahedral         | 6 | Chelate           | N-Donor  |         |
| 779 | RACYUS   | 970 | Discrete Molecule      | D-Trigonal Bipyramid | 5 | Chelate           | N-Donor  | O-Donor |
| 780 | RAFJUD   | 971 | Discrete Molecule      | Seesaw               | 4 | Chelate           | N-Donor  |         |
|     |          | 972 | Polymer Through Anion  | Square Pyramid       | 5 | Non-Chelate       | O-Donor  |         |
| 781 | RAHCOT   | 973 | Dimer Through Anion    | Seesaw               | 4 | Non-Chelate       | C-Donor  |         |
| 782 | RAHCUZ   | 974 | Dimer Through Anion    | Seesaw               | 4 | Non-Chelate       | C-Donor  |         |
| 783 | RAHDAG   | 975 | Dimer Through Anion    | Seesaw               | 4 | Non-Chelate       | C-Donor  |         |
| 784 | RAHDEK   | 976 | Dimer Through Anion    | Seesaw               | 4 | Non-Chelate       | C-Donor  |         |
| 785 | RAHDIO   | 977 | Polymer Through Anion  | Seesaw               | 4 | Chelate           | C-Donor  |         |
|     |          | 978 | Discrete Molecule      | Seesaw               | 4 | Non-Chelate       | C-Donor  |         |
| 786 | RAJMAR   | 979 | Discrete Molecule      | Seesaw               | 4 | Chelate           | O-Donor  |         |

|     |          |      |                         |                      |   |                   |          |         |
|-----|----------|------|-------------------------|----------------------|---|-------------------|----------|---------|
| 787 | RARBET   | 980  | Dimer Through Anion     | D-Trigonal Bipyramid | 5 | Chelate           | N-Donor  | O-Donor |
| 788 | RARZIV   | 981  | Discrete Molecule       | Seesaw               | 4 | Non-Chelate       | N-Donor  |         |
| 789 | RASGIC   | 982  | Polymer Through Anion   | Seesaw               | 4 | Non-Chelate       | S-Donor  |         |
|     |          | 983  | Polymer Through Anion   | Trigonal Bipyramid   | 5 | Non-Chelate       | S-Donor  |         |
| 790 | RAWSUE   | 984  | Dimer Through Ligand    | Seesaw               | 4 | Metal Halide Only | N-Donor  |         |
| 791 | RAZDOM   | 985  | Dimer Through Anion     | Tetrahedral          | 4 | Metal Halide Only | Chlorine |         |
| 792 | RAZDUS   | 986  | Dimer Through Anion     | Tetrahedral          | 4 | Metal Halide Only | Chlorine |         |
|     |          | 987  | Discrete Molecule       | Linear               | 2 | Metal Halide Only | Chlorine |         |
| 793 | RAZTES   | 988  | Polymer Through Anion   | D-Octahedral         | 6 | Non-Chelate       | O-Donor  |         |
| 794 | RAZTUI   | 989  | Dimer Through Anion     | D-Tetrahedral (Py)   | 4 | Non-Chelate       | S-Donor  |         |
| 795 | RECZUU   | 990  | Tetramer Through Ligand | D-Octahedral         | 6 | Non-Chelate       | S-Donor  | O-Donor |
|     |          | 991  | Tetramer Through Anion  | Seesaw               | 4 | Non-Chelate       | S-Donor  | O-Donor |
|     |          | 992  | Tetramer Through Anion  | Tetrahedral          | 4 | Metal Halide Only | Chlorine |         |
| 796 | REDDUZ   | 993  | Polymer through ligand  | Square Planar        | 4 | Non-Chelate       | O-Donor  |         |
|     |          | 994  | Polymer through ligand  | Seesaw               | 4 | Non-Chelate       | O-Donor  |         |
|     |          | 995  | Polymer through ligand  | Seesaw               | 4 | Non-Chelate       | S-Donor  | O-Donor |
| 797 | REDTEB   | 996  | Dimer Through Anion     | T-Shape              | 5 | Chelate           | N-Donor  |         |
|     |          | 997  | Dimer Through Anion     | Tetrahedral          | 4 | Metal Halide Only | Chlorine |         |
| 798 | REJTEF   | 998  | Discrete Molecule       | Seesaw               | 4 | Non-Chelate       | C-Donor  |         |
| 799 | REMDUI   | 999  | Discrete Molecule       | Seesaw               | 4 | Chelate           | N-Donor  |         |
| 800 | REXZUP   | 1000 | Polymer Through Anion   | D-Octahedral         | 4 | Non-Chelate       | N-Donor  |         |
|     |          | 1001 | Polymer Through Ligand  | D-Octahedral         | 4 | Non-Chelate       | N-Donor  |         |
| 801 | REZWEZ   | 1002 | Polymer through ligand  | Square Pyramid       | 5 | Non-Chelate       | N-Donor  |         |
| 802 | RICSEC   | 1003 | Dimer Through Anion     | Tetrahedral          | 4 | Metal Halide Only | Chlorine |         |
| 803 | RICSIG   | 1004 | Dimer Through Anion     | Tetrahedral          | 4 | Metal Halide Only | Chlorine |         |
| 804 | RIHGUL   | 1005 | Polymer Through Ligand  | Square Pyramid       | 5 | Non-Chelate       | N-Donor  |         |
| 805 | RILHID   | 1006 | Discrete Molecule       | T-Shape              | 6 | Non-Chelate       | O-Donor  |         |
| 806 | RILHID01 | 1007 | Discrete Molecule       | T-Shape              | 6 | Non-Chelate       | O-Donor  |         |
| 807 | RINWES   | 1008 | Discrete Molecule       | Seesaw               | 4 | Metal Halide Only | Chlorine |         |
| 808 | RINXET   | 1009 | Discrete Molecule       | T-Shape              | 5 | Non-Chelate       | N-Donor  | O-Donor |
| 809 | RITLUB   | 1010 | Dimer Through Anion     | Tetrahedral          | 4 | Metal Halide Only | Chlorine |         |
|     |          | 1011 | Dimer Through Anion     | D-Tetrahedral (Py)   | 4 | Non-Chelate       | P-Donor  |         |
| 810 | RIVMEO   | 1012 | Dimer Through Ligand    | T-Shape              | 6 | Non-Chelate       | C-Donor  |         |
| 811 | RIXGUA   | 1013 | Discrete Molecule       | D-Trigonal Bipyramid | 5 | Chelate           | N-Donor  |         |
|     |          | 1014 | Discrete Molecule       | Tetrahedral          | 4 | Metal Halide Only | Chlorine |         |
| 812 | RIYHOX   | 1015 | Discrete Molecule       | Seesaw               | 4 | Non-Chelate       | N-Donor  |         |
| 813 | ROGVOY   | 1016 | Discrete Molecule       | Tetrahedral          | 4 | Metal Halide Only | Chlorine |         |
| 814 | ROKGED   | 1017 | Polymer Through Anion   | Seesaw               | 4 | Metal Halide Only | Chlorine |         |
| 815 | ROKHAA   | 1018 | Discrete Molecule       | Tetrahedral          | 4 | Metal Halide Only | Chlorine |         |
| 816 | RUBMUX   | 1019 | Polymer Through Ligand  | Seesaw               | 4 | Non-Chelate       | N-Donor  |         |
| 817 | RUKFOS   | 1020 | Discrete Molecule       | Hexagonal Bipyramid  | 8 | Chelate           | O-Donor  |         |
| 818 | RUMWOM   | 1021 | Polymer Through Ligand  | Seesaw               | 4 | Non-Chelate       | N-Donor  |         |
| 819 | RUQNAT   | 1022 | Discrete Molecule       | T-Shape              | 5 | Chelate           | N-Donor  | O-Donor |
| 820 | RUSNEZ   | 1023 | Polymer Through Anion   | D-Octahedral         | 6 | Non-Chelate       | N-Donor  |         |
| 821 | RUTSEG   | 1024 | Discrete Molecule       | Tetrahedral          | 4 | Metal Halide Only | Chlorine |         |
| 822 | RUXBOD   | 1025 | Dimer Through Anion     | Tetrahedral          | 4 | Metal Halide Only | Chlorine |         |
| 823 | RUYVUE   | 1026 | Polymer Through Ligand  | Trigonal bipyramid   | 5 | Non-Chelate       | O-Donor  | N-Donor |
|     |          | 1027 | Polymer Through Anion   | Trigonal             | 3 | Metal Halide Only | Chlorine |         |
| 824 | RUYWIT   | 1028 | Polymer Through Ligand  | Trigonal Bipyramid   | 5 | Non-Chelate       | N-Donor  | O-Donor |
| 825 | SACHOV   | 1029 | Polymer Through Anion   | Linear               | 2 | Non-Chelate       | N-Donor  |         |
|     |          | 1030 | Polymer Through Ligand  | Square Planar        | 4 | Non-Chelate       | N-Donor  |         |
|     |          | 1031 | Polymer Through Anion   | Tetrahedral          | 4 | Metal Halide Only | Chlorine |         |
| 826 | SACPAQ   | 1032 | Polymer Through Ligand  | Square Pyramid       | 5 | Non-Chelate       | O-Donor  |         |
|     |          | 1033 | Polymer Through Ligand  | Seesaw               | 4 | Non-Chelate       | N-Donor  |         |
|     |          | 1034 | Polymer Through Ligand  | D-Tetrahedral (Py)   | 4 | Non-Chelate       | N-Donor  |         |
|     |          | 1035 | Polymer Through Anion   | Square Pyramid       | 5 | Metal Halide Only | Chlorine |         |
|     |          | 1036 | Polymer Through Anion   | Trigonal Bipyramid   | 5 | Metal Halide Only | Chlorine |         |
|     |          | 1037 | Polymer Through Anion   | Seesaw               | 4 | Metal Halide Only | Chlorine |         |
| 827 | SAJVEF   | 1038 | Discrete molecule       | Seesaw               | 4 | Chelate           | N-Donor  |         |
| 828 | SAKBOV   | 1039 | Polymer Through Anion   | D-Tetrahedral (Py)   | 4 | Non-Chelate       | S-Donor  |         |
| 829 | SARPUX   | 1040 | Discrete Molecule       | Seesaw               | 4 | Non-Chelate       | S-Donor  |         |
| 830 | SAVQOV   | 1041 | Discrete Molecule       | T-Shape              | 5 | Chelate           | N-Donor  |         |

|     |          |      |                         |                      |   |                   |           |          |
|-----|----------|------|-------------------------|----------------------|---|-------------------|-----------|----------|
| 831 | SAXDOK   | 1042 | Polymer Through Anion   | Square Pyramid       | 5 | Non-Chelate       | N-Donor   |          |
| 832 | SAXFAA   | 1043 | Dimer Through Anion     | Tetrahedral          | 4 | Metal Halide Only | Chlorine  |          |
| 833 | SAYKUY   | 1044 | Discrete Molecule       | D-Tetrahedral (Py)   | 4 | Metal Halide Only | Iodine    | Chlorine |
| 834 | SAYLAF   | 1045 | Dimer Through Anion     | Tetrahedral          | 4 | Metal Halide Only | Chlorine  |          |
| 835 | SAYMAI   | 1046 | Dimer Through Anion     | Tetrahedral          | 4 | Metal Halide Only | Chlorine  |          |
| 836 | SAYMIQ   | 1047 | Tetramer Through Ligand | Tetrahedral          | 4 | Metal Halide Only | Chlorine  |          |
|     |          | 1048 | Tetramer Through Ligand | D-Tetrahedral (Py)   | 4 | Non-Chelate       | N-Donor   |          |
|     |          | 1049 | Tetramer Through Anion  | D-Square Pyramid     | 5 | Non-Chelate       | O-Donor   | N-Donor  |
| 837 | SEBNAP   | 1050 | Polymer Through Anion   | D-Tetrahedral (Py)   | 4 | Non-Chelate       | O-Donor   |          |
| 838 | SEPCAS   | 1051 | Trimer Through Anion    | Tetrahedral          | 4 | Metal Halide Only | Chlorine  |          |
|     |          | 1052 | Trimer Through Anion    | Octahedral           | 6 | Metal Halide Only | Chlorine  |          |
| 839 | SEPCEW   | 1053 | Dimer Through Anion     | Tetrahedral          | 4 | Metal Halide Only | Chlorine  |          |
| 840 | SEPCIA   | 1054 | Polymer Through Anion   | Tetrahedral          | 4 | Metal Halide Only | Chlorine  |          |
|     |          | 1055 | Polymer Through Anion   | Square Pyramid       | 5 | Metal Halide Only | Chlorine  |          |
|     |          | 1056 | Polymer Through Anion   | Seesaw               | 4 | Metal Halide Only | Chlorine  |          |
| 841 | SERGOL   | 1057 | Dimer Through Anion     | Tetrahedral          | 4 | Metal Halide Only | Chlorine  |          |
| 842 | SETJAD   | 1058 | Polymer Through Anion   | Tetrahedral          | 4 | Metal to Metal    | Copper    |          |
| 843 | SINHEE   | 1059 | Polymer Through Ligand  | Tetrahedral          | 4 | Non-Chelate       | N-Donor   |          |
| 844 | SIRDEC   | 1060 | Dimer Through Ligand    | Seesaw               | 4 | Non-Chelate       | O-Donor   |          |
| 845 | SIRMAH   | 1061 | Dimer Through Anion     | Seesaw               | 4 | Metal Halide Only | Chlorine  |          |
| 846 | SISLUB   | 1062 | Dimer Through Anion     | Square Planar        | 4 | Metal to Metal    | Ruthenium |          |
|     |          | 1063 | Dimer Through Anion     | Tetrahedral          | 4 | Metal Halide Only | Chlorine  |          |
| 847 | SISLUB10 | 1064 | Dimer Through Anion     | Square Planar        | 4 | Metal to Metal    | Ruthenium |          |
|     |          | 1065 | Dimer Through Anion     | Tetrahedral          | 4 | Metal Halide Only | Chlorine  |          |
| 848 | SIWJIT   | 1066 | Dimer Through Anion     | D-Tetrahedral (Py)   | 4 | Non-Chelate       | C-Donor   |          |
| 849 | SODZES   | 1067 | Discrete Molecule       | Trigonal             | 3 | Non-Chelate       | N-Donor   |          |
| 850 | SOHCUP   | 1068 | Discrete molecule       | Square Pyramid       | 5 | Non-Chelate       | N-Donor   | O-Donor  |
| 851 | SOHKEH   | 1069 | Polymer Through Ligand  | D-Trigonal Bipyramid | 5 | Chelate           | N-Donor   | O-Donor  |
| 852 | SOHMAF   | 1070 | Discrete Molecule       | Seesaw               | 4 | Non-Chelate       | N-Donor   |          |
| 853 | SOPDOQ   | 1071 | Polymer Through Anion   | Seesaw               | 4 | Non-Chelate       | Bromine   |          |
| 854 | SOYPIF   | 1072 | Discrete Molecule       | Trigonal             | 3 | Metal Halide Only | Chlorine  |          |
| 855 | SUPWIL   | 1073 | Dimer Through Anion     | D-Trigonal Bipyramid | 5 | Chelate           | N-Donor   |          |
| 856 | SURHGC   | 1074 | Discrete Molecule       | D-Trigonal Bipyramid | 5 | Non-Chelate       | S-Donor   |          |
| 857 | SURNOI   | 1075 | Dimer Through Ligand    | T-Shape              | 5 | Chelate           | S-Donor   | O-Donor  |
| 858 | SUSJAR   | 1076 | Discrete Molecule       | Seesaw               | 4 | Chelate           | O-Donor   |          |
| 859 | TACSUM   | 1077 | Discrete Molecule       | Trigonal Bipyramid   | 5 | Chelate           | S-Donor   |          |
| 860 | TACTAT   | 1078 | Polymer Through Ligand  | D-Octahedral         | 6 | Chelate           | S-Donor   |          |
| 861 | TAGCAF   | 1079 | Polymer Through Anion   | Trigonal Bipyramid   | 5 | Metal Halide Only | Chlorine  |          |
| 862 | TAJCAJ   | 1080 | Dimer Through Ligand    | Trigonal             | 3 | Chelate           | N-Donor   |          |
|     |          | 1081 | Dimer Through Ligand    | Square Planar        | 4 | Non-Chelate       | N-Donor   |          |
| 863 | TAKMUP   | 1082 | Dimer Through Anion     | Trigonal Bipyramid   | 5 | Chelate           | S-Donor   | N-Donor  |
|     |          | 1083 | Discrete Molecule       | Tetrahedral          | 4 | Metal Halide Only | Chlorine  |          |
| 864 | TAMHGC   | 1084 | Polymer through anion   | D-Octahedral         | 6 | Non-Chelate       | S-Donor   |          |
| 865 | TAZGAC   | 1085 | Dimer through anion     | D-Tetrahedral (Py)   | 4 | Non-Chelate       | S-Donor   |          |
| 866 | TBTPHG   | 1086 | Tetramer Through Anion  | Seesaw               | 4 | Non-Chelate       | N-Donor   | S-Donor  |
|     |          | 1087 | Tetramer Through Anion  | Bent                 | 4 | Non-Chelate       | S-Donor   |          |
| 867 | TEBPAS   | 1088 | Tetramer Through Anion  | Trigonal             | 3 | Non-Chelate       | C-Donor   |          |
| 868 | TEBPEW   | 1089 | Tetramer Through Anion  | Trigonal             | 3 | Non-Chelate       | C-Donor   |          |
| 869 | TEDBEJ   | 1090 | Dimer Through Anion     | Tetrahedral          | 4 | Metal Halide Only | Chlorine  |          |
| 870 | TEKXOW   | 1091 | Discrete Molecule       | Tetrahedral          | 4 | Metal Halide Only | Chlorine  |          |
| 871 | TENNAD   | 1092 | Dimer Through Anion     | D-Tetrahedral (Py)   | 4 | Non-Chelate       | C-Donor   |          |
| 872 | TESTHG   | 1093 | Discrete Molecule       | Seesaw               | 4 | Non-Chelate       | O-Donor   |          |
| 873 | TESZUM   | 1094 | Discrete Molecule       | T-Shape              | 5 | Chelate           | N-Donor   |          |
| 874 | TEVQIU01 | 1095 | Polymer Through Anion   | Bent                 | 4 | Non-Chelate       | S-Donor   |          |
|     |          | 1096 | Polymer Through Anion   | Trigonal Bipyramid   | 5 | Non-Chelate       | S-Donor   |          |
| 875 | TEZTEX   | 1097 | Discrete Molecule       | Tetrahedral          | 4 | Metal Halide Only | Chlorine  |          |
| 876 | TIBCOY   | 1098 | Polymer Through Ligand  | Seesaw               | 4 | Non-Chelate       | N-Donor   |          |
| 877 | TIFTOR   | 1099 | Dimer Through Anion     | D-Tetrahedral (Py)   | 4 | Non-Chelate       | S-Donor   |          |
| 878 | TIGGUL   | 1100 | Discrete Molecule       | Tetrahedral          | 4 | Metal Halide Only | Chlorine  |          |
| 879 | TIGHAS   | 1101 | Discrete Molecule       | Tetrahedral          | 4 | Metal Halide Only | Chlorine  |          |
| 880 | TIGHEW   | 1102 | Discrete Molecule       | Tetrahedral          | 4 | Metal Halide Only | Chlorine  |          |
| 881 | TIGHIA   | 1103 | Dimer Through Anion     | Tetrahedral          | 4 | Metal Halide Only | Chlorine  |          |



|     |          |      |                         |                    |   |                   |     |          |         |        |
|-----|----------|------|-------------------------|--------------------|---|-------------------|-----|----------|---------|--------|
| 882 | TIGHOG   | 1104 | Discrete Molecule       | Tetrahedral        | 4 | Metal Halide Only |     | Chlorine |         |        |
| 883 | TIGHUM   | 1105 | Discrete Molecule       | Tetrahedral        | 4 | Metal Halide Only |     | Chlorine |         |        |
| 884 | TIKSIQ   | 1106 | Discrete Molecule       | T-Shape            | 5 | Chelate           | M-M | O-Donor  | Nickel  |        |
| 885 | TIKSIQ01 | 1107 | Discrete Molecule       | T-Shape            | 5 | Chelate           | M-M | O-Donor  | Nickel  |        |
| 886 | TIKSIQ02 | 1108 | Discrete Molecule       | T-Shape            | 5 | Chelate           | M-M | O-Donor  | Nickel  |        |
| 887 | TINWOC   | 1109 | Dimer through anion     | Tetrahedral        | 4 | Metal Halide Only |     | Chlorine |         |        |
|     |          | 1110 | Dimer through anion     | D-Octahedral       | 6 | Chelate           | M-M | N-Donor  | C-Donor | Iron   |
| 888 | TIZNIB   | 1111 | Polymer Through Ligand  | Seesaw             | 4 | Non-Chelate       |     | N-Donor  | O-Donor |        |
| 889 | TIZYEH   | 1112 | Polymer Through Anion   | Seesaw             | 4 | Non-Chelate       |     | O-Donor  |         |        |
|     |          | 1113 | Polymer Through Anion   | Square Pyramid     | 5 | Non-Chelate       |     | O-Donor  |         |        |
| 890 | TMDPHG   | 1114 | Polymer Through Ligand  | Seesaw             | 4 | Non-Chelate       |     | P-Donor  |         |        |
| 891 | TMSCHG   | 1115 | Polymer Through Anion   | Trigonal Bipyramid | 5 | Metal Halide Only |     | Chlorine |         |        |
| 892 | TODQOS   | 1116 | Dimer Through Ligand    | D-Tetrahedral (Py) | 4 | Chelate           |     | N-Donor  |         |        |
| 893 | TOGMIL   | 1117 | Dimer Through Anion     | Tetrahedral        | 4 | Metal Halide Only |     | Chlorine |         |        |
| 894 | TOLLAI   | 1118 | Discrete Molecule       | Tetrahedral        | 4 | Metal Halide Only |     | Chlorine |         |        |
| 895 | TOPZOP   | 1119 | Discrete Molecule       | Tetrahedral        | 4 | Metal Halide Only |     | Chlorine |         |        |
| 896 | TORGUC   | 1120 | Discrete Molecule       | Seesaw             | 4 | Non-Chelate       |     | P-Donor  |         |        |
| 897 | TPHGCL10 | 1121 | Dimer Through Anion     | D-Tetrahedral (Py) | 4 | Non-Chelate       |     | P-Donor  |         |        |
| 898 | TPHGCL11 | 1122 | Dimer Through Anion     | D-Tetrahedral (Py) | 4 | Non-Chelate       |     | P-Donor  |         |        |
| 899 | TRPHGA   | 1123 | Polymer Through Anion   | Trigonal Bipyramid | 5 | Metal Halide Only |     | Chlorine |         |        |
| 900 | TTPHGC10 | 1124 | Dimer Through Ligand    | Bent               | 4 | Non-Chelate       |     | S-Donor  |         |        |
| 901 | TUBJJJ   | 1125 | Discrete Molecule       | Seesaw             | 4 | Non-Chelate       |     | N-Donor  |         |        |
| 902 | TUBXOF   | 1126 | Dimer Through Anion     | Trigonal           | 3 | Metal Halide Only |     | Chlorine |         |        |
|     |          | 1127 | Dimer Through Anion     | T-Shape            | 5 | Chelate           | M-M | O-Donor  | Nickel  |        |
| 903 | TUBYAS   | 1128 | Discrete Molecule       | D-Octahedral       | 6 | Chelate           |     | O-Donor  |         |        |
| 904 | TUBYOG   | 1129 | Oligomer Through Ligand | T-Shape            | 8 | Chelate           | M-M | O-Donor  | N-Donor | Nickel |
|     |          | 1130 | Oligomer Through Ligand | T-Shape            | 7 | Chelate           | M-M | O-Donor  | N-Donor | Nickel |
| 905 | TUFJUA   | 1131 | Polymer Through Anion   | D-Octahedral       | 6 | Non-Chelate       |     | N-Donor  |         |        |
| 906 | TUFKAH   | 1132 | Polymer Through Anion   | D-Octahedral       | 6 | Non-Chelate       |     | N-Donor  |         |        |
|     |          | 1133 | Polymer Through Ligand  | D-Octahedral       | 6 | Non-Chelate       |     | N-Donor  |         |        |
| 907 | TUJXOM   | 1134 | Discrete Molecule       | Seesaw             | 4 | Chelate           |     | N-Donor  |         |        |
| 908 | UCEYUX   | 1135 | Discrete Molecule       | Seesaw             | 4 | Non-Chelate       |     | S-Donor  |         |        |
| 909 | UCEZAE   | 1136 | Trimer Through Anion    | Square Planar      | 4 | Metal Halide Only |     | Chlorine |         |        |
|     |          | 1137 | Trimer Through Anion    | Tetrahedral        | 4 | Metal Halide Only |     | Chlorine |         |        |
| 910 | UCIVAF   | 1138 | Dimer Through Anion     | D-Tetrahedral (Py) | 4 | Non-Chelate       |     | S-Donor  |         |        |
| 911 | UCIVOS   | 1139 | Polymer Through Anion   | Tetrahedral        | 4 | Metal Halide Only |     | Chlorine |         |        |
| 912 | UFACIO   | 1140 | Dimer Through Anion     | D-Square Pyramid   | 5 | Chelate           |     | N-Donor  |         |        |
| 913 | UGUBOO   | 1141 | Dimer Through Anion     | Tetrahedral        | 4 | Metal Halide Only |     | Chlorine |         |        |
| 914 | UGUPOB   | 1142 | Polymer Through Anion   | Tetrahedral        | 4 | Metal Halide Only |     | Chlorine |         |        |
| 915 | UGUQES   | 1143 | Tetramer Through Anion  | Tetrahedral        | 4 | Metal Halide Only |     | Chlorine |         |        |
|     |          | 1144 | Tetramer Through Anion  | Trigonal           | 3 | Metal Halide Only |     | Chlorine |         |        |
| 916 | UHUTIA   | 1145 | Trimer Through Anion    | D-Tetrahedral (Py) | 4 | Non-Chelate       |     | S-Donor  |         |        |
|     |          | 1146 | Trimer Through Anion    | Trigonal           | 3 | Metal Halide Only |     | Chlorine |         |        |
| 917 | UHUWUP   | 1147 | Polymer Through Anion   | Seesaw             | 4 | Non-Chelate       |     | C-Donor  |         |        |
|     |          | 1148 | Polymer Through Anion   | Tetrahedral        | 4 | Metal Halide Only |     | Chlorine |         |        |
| 918 | UJECER   | 1149 | Discrete Molecule       | Tetrahedral        | 4 | Metal Halide Only |     | Chlorine |         |        |
| 919 | UJIKEE   | 1150 | Discrete Molecule       | D-Octahedral       | 6 | Chelate           |     | N-Donor  | O-Donor |        |
| 920 | ULAMEA   | 1151 | Discrete Molecule       | Square Pyramid     | 5 | Chelate           |     | N-Donor  |         |        |
| 921 | UQEREO   | 1152 | Dimer Through Anion     | Trigonal Bipyramid | 5 | Metal Halide Only |     | Chlorine |         |        |
| 922 | UQOXOO   | 1153 | Discrete Molecule       | Tetrahedral        | 4 | Metal Halide Only |     | Chlorine |         |        |
| 923 | URILHG   | 1154 | Polymer Through Anion   | D-Octahedral       | 6 | Non-Chelate       |     | O-Donor  |         |        |
| 924 | USIHOU   | 1155 | Polymer Through Anion   | D-Tetrahedral (Py) | 4 | Non-Chelate       |     | C-Donor  |         |        |
|     |          | 1156 | Polymer Through Ligand  | D-Tetrahedral (Py) | 4 | Non-Chelate       |     | C-Donor  |         |        |
| 925 | USUXAI   | 1157 | Discrete Molecule       | Seesaw             | 4 | Non-Chelate       |     | P-Donor  |         |        |
| 926 | UTIZIH   | 1158 | Discrete Molecule       | Tetrahedral        | 4 | Metal Halide Only |     | Chlorine |         |        |
| 927 | UYAGOR   | 1159 | Discrete Molecule       | Seesaw             | 4 | Non-Chelate       |     | N-Donor  |         |        |
| 928 | UYUSOX   | 1160 | Polymer Through Ligand  | D-Square Pyramid   | 5 | Chelate           |     | O-Donor  |         |        |
| 929 | UYUSUD   | 1161 | Pentamer Through Anion  | T-Shape            | 3 | Metal Halide Only |     | Chlorine |         |        |
|     |          | 1162 | Pentamer Through Ligand | T-Shape            | 3 | Non-Chelate       |     | O-Donor  |         |        |
| 930 | VAGNID   | 1163 | Discrete Molecule       | Seesaw             | 4 | Non-Chelate       |     | N-Donor  |         |        |
| 931 | VAHGIV   | 1164 | Discrete Molecule       | Tetrahedral        | 4 | Metal Halide Only |     | Chlorine |         |        |
| 932 | VAHGIV01 | 1165 | Discrete Molecule       | Tetrahedral        | 4 | Metal Halide Only |     | Chlorine |         |        |

|     |          |      |                         |                    |   |                   |                   |
|-----|----------|------|-------------------------|--------------------|---|-------------------|-------------------|
| 933 | VAHGIV02 | 1166 | Discrete Molecule       | Tetrahedral        | 4 | Metal Halide Only | Chlorine          |
| 934 | VALRUX   | 1167 | Discrete Molecule       | D-Octahedral       | 6 | Non-Chelate       | O-Donor           |
| 935 | VAQHUQ   | 1168 | Discrete Molecule       | Seesaw             | 4 | Chelate           | O-Donor   N-Donor |
| 936 | VARXUJ   | 1169 | Polymer Through Anion   | D-Tetrahedral (Py) | 4 | Non-Chelate       | N-Donor           |
| 937 | VAXGAC   | 1170 | Dimer Through Anion     | D-Tetrahedral (Py) | 4 | Non-Chelate       | P-Donor           |
| 938 | VAXJOT   | 1171 | Polymer Through Ligand  | Seesaw             | 4 | Non-Chelate       | S-Donor           |
|     |          | 1172 | Polymer Through Anion   | Seesaw             | 4 | Non-Chelate       | S-Donor           |
| 939 | VAYHOS   | 1173 | Polymer Through Anion   | Tetrahedral        | 4 | Metal Halide Only | Chlorine          |
| 940 | VEGROQ   | 1174 | Discrete Molecule       | Seesaw             | 4 | Non-Chelate       | N-Donor           |
| 941 | VEHSIL   | 1175 | Discrete Molecule       | Tetrahedral        | 4 | Metal Halide Only | Chlorine          |
| 942 | VEHSOR   | 1176 | Discrete Molecule       | Tetrahedral        | 4 | Metal Halide Only | Chlorine          |
| 943 | VEHSUX   | 1177 | Discrete Molecule       | Tetrahedral        | 4 | Metal Halide Only | Chlorine          |
| 944 | VEKCET   | 1178 | Polymer Through Anion   | Seesaw             | 4 | Non-Chelate       | S-Donor           |
|     |          | 1179 | Polymer Through Ligand  | D-Tetrahedral (Py) | 4 | Metal to Metal    | Ruthenium         |
| 945 | VEYFAH   | 1180 | Dimer Through Anion     | Trigonal Bipyramid | 5 | Chelate           | N-donor           |
| 946 | VEZLAP   | 1181 | Polymer Through Anion   | Square Pyramid     | 5 | Non-Chelate       | N-Donor           |
|     |          | 1182 | Polymer Through Ligand  | D-Tetrahedral (Py) | 4 | Non-Chelate       | N-Donor           |
| 947 | VEZLET   | 1183 | Tetramer Through Ligand | Seesaw             | 4 | Non-Chelate       | N-Donor           |
| 948 | VEZLIX   | 1184 | Polymer Through Ligand  | Seesaw             | 4 | Non-Chelate       | N-Donor           |
| 949 | VEZYAC   | 1185 | Discrete Molecule       | Seesaw             | 4 | Non-Chelate       | S-Donor           |
| 950 | VEZYES   | 1186 | Dimer Through Anion     | D-Tetrahedral (Py) | 4 | Non-Chelate       | S-Donor           |
| 951 | VICFIW   | 1187 | Discrete Molecule       | Trigonal           | 3 | Non-Chelate       | O-Donor           |
|     |          | 1188 | Discrete Molecule       | Linear             | 2 | Metal Halide Only | Chlorine          |
| 952 | VINTUJ   | 1189 | Polymer Through Anion   | Octahedral         | 6 | Metal Halide Only | Chlorine          |
| 953 | VIRKIS   | 1190 | Discrete Molecule       | Seesaw             | 4 | Non-Chelate       | S-Donor           |
| 954 | VIWKOC   | 1191 | Discrete Molecule       | T-Shape            | 5 | Non-Chelate       | N-Donor           |
| 955 | VIWKOC01 | 1192 | Discrete Molecule       | T-Shape            | 5 | Non-Chelate       | N-Donor           |
| 956 | VOBJOM   | 1193 | Dimer Through Anion     | Trigonal Bipyramid | 5 | Non-Chelate       | S-Donor           |
| 957 | VOBKAZ   | 1194 | Polymer Through Anion   | Trigonal Bipyramid | 5 | Non-Chelate       | S-Donor           |
|     |          | 1195 | Polymer Through Ligand  | Trigonal Bipyramid | 5 | Non-Chelate       | S-Donor           |
| 958 | VOCPEJ   | 1196 | Polymer Through Anion   | Square Pyramid     | 5 | Metal Halide Only | Chlorine          |
| 959 | VOFSEO   | 1197 | Discrete Molecule       | D-Tetrahedral (Py) | 4 | Non-Chelate       | P-Donor           |
| 960 | VOGLOU   | 1198 | Dimer Through Ligand    | T-Shape            | 5 | Non-Chelate       | O-Donor           |
| 961 | VOGMOV   | 1199 | Discrete Molecule       | Seesaw             | 4 | Chelate           | O-Donor           |
| 962 | VORPAT   | 1200 | Discrete Molecule       | Seesaw             | 4 | Non-Chelate       | N-Donor           |
| 963 | VORZOR   | 1201 | Dimer Through Anion     | Seesaw             | 4 | Metal to Metal    | Osmium            |
| 964 | VOTXUZ   | 1202 | Discrete Molecule       | Seesaw             | 4 | Non-Chelate       | S-Donor           |
| 965 | VOVRUV   | 1203 | Polymer Through Anion   | D-Tetrahedral (Py) | 4 | Non-Chelate       | S-Donor           |
| 966 | VOWKOJ   | 1204 | Polymer Through Ligand  | T-Shape            | 4 | Non-Chelate       | N-Donor           |
| 967 | VUDJOT   | 1205 | Discrete Molecule       | Seesaw             | 4 | Non-Chelate       | P-Donor           |
| 968 | VUDSET   | 1206 | Discrete Molecule       | Seesaw             | 4 | Metal to Metal    | Tellurium         |
| 969 | VUDSIX   | 1207 | Dimer Through Anion     | D-Tetrahedral (Py) | 4 | Metal to Metal    | Tellurium         |
| 970 | VUDSUJ   | 1208 | Polymer Through Anion   | Square Pyramid     | 5 | Metal Halide Only | Chlorine          |
|     |          | 1209 | Polymer Through Anion   | Trigonal Bipyramid | 5 | Metal to Metal    | Tellurium         |
|     |          | 1210 | Polymer Through Anion   | Octahedral         | 6 | Metal Halide Only | Chlorine          |
| 971 | VUFPAN   | 1211 | Trimer Through Anion    | Seesaw             | 4 | Non-Chelate       | P-Donor           |
| 972 | VUJZAC   | 1212 | Polymer Through Ligand  | Seesaw             | 4 | Non-Chelate       | N-Donor           |
| 973 | VULLAQ   | 1213 | Polymer Through Ligand  | Seesaw             | 4 | Non-Chelate       | N-Donor           |
| 974 | VULMUM   | 1214 | Discrete Molecule       | Seesaw             | 4 | Chelate           | N-Donor           |
| 975 | VUPWOT   | 1215 | Polymer Through Ligand  | Seesaw             | 4 | Non-Chelate       | S-Donor           |
| 976 | VUPXAG   | 1216 | Polymer Through Ligand  | Square Pyramid     | 5 | Non-Chelate       | S-Donor           |
|     |          | 1217 | Polymer Through Anion   | Square Pyramid     | 5 | Non-Chelate       | S-Donor           |
| 977 | VUWGEZ   | 1218 | Discrete Molecule       | Seesaw             | 4 | Chelate           | O-Donor   N-Donor |
| 978 | VUWVAK   | 1219 | Dimer Through Anion     | Tetrahedral        | 4 | Metal Halide Only | Chlorine          |
| 979 | VUWVEO   | 1220 | Dimer Through Anion     | Tetrahedral        | 4 | Metal Halide Only | Chlorine          |
| 980 | VUWVIS   | 1221 | Discrete Molecule       | Seesaw             | 4 | Metal Halide Only | Chlorine          |
| 981 | VUWVIS01 | 1222 | Discrete Molecule       | Seesaw             | 4 | Metal Halide Only | Chlorine          |
| 982 | VUWVOY   | 1223 | Trimer Through Anion    | Tetrahedral        | 4 | Metal Halide Only | Chlorine          |
|     |          | 1224 | Trimer Through Anion    | Octahedral         | 6 | Metal Halide Only | Chlorine          |
| 983 | VUWVUE   | 1225 | Dimer Through Anion     | Square Pyramid     | 5 | Metal Halide Only | Chlorine          |
|     |          | 1226 | Dimer Through Anion     | Trigonal Pyramid   | 4 | Metal Halide Only | Chlorine          |
| 984 | VUYDEA   | 1227 | Discrete Molecule       | T-Shape            | 5 | Chelate           | O-Donor           |
| 985 | WABCEH   | 1228 | Polymer Through Anion   | Trigonal           | 3 | Metal to Metal    | Iridium           |

|      |          |      |                        |                      |   |                   |                   |
|------|----------|------|------------------------|----------------------|---|-------------------|-------------------|
|      |          | 1229 | Polymer Through Anion  | Tetrahedral          | 4 | Metal Halide Only | Chlorine          |
| 986  | WASGOM   | 1230 | Discrete Molecule      | Seesaw               | 4 | Non-Chelate       | C-Donor           |
| 987  | WAXHOU   | 1231 | Dimer Through Anion    | Square Pyramid       | 5 | Chelate           | N-Donor           |
| 988  | WAXHUA   | 1232 | Discrete Molecule      | T-Shape              | 5 | Chelate           | N-Donor           |
| 989  | WAXJAI   | 1233 | Polymer Through Anion  | T-Shape              | 5 | Chelate           | N-Donor           |
|      |          | 1234 | Polymer Through Anion  | Trigonal Bipyramid   | 5 | Metal Halide Only | Chlorine          |
| 990  | WAYNUH   | 1235 | Dimer Through Anion    | Seesaw               | 4 | Non-Chelate       | Se-Donor          |
| 991  | WAYWOK   | 1236 | Polymer Through Anion  | D-Octahedral         | 6 | Non-Chelate       | N-Donor           |
| 992  | WECGAO   | 1237 | Dimer Through Anion    | Tetrahedral          | 4 | Metal Halide Only | Chlorine          |
| 993  | WEKPEJ   | 1238 | Polymer Through Ligand | Seesaw               | 4 | Non-Chelate       | N-Donor           |
| 994  | WEKPOT   | 1239 | Polymer Through Ligand | Seesaw               | 4 | Non-Chelate       | N-Donor           |
| 995  | WENVIU   | 1240 | Dimer Through Ligand   | D-Tetrahedral (Py)   | 4 | Non-Chelate       | N-Donor           |
|      |          | 1241 | Dimer Through Ligand   | Seesaw               | 4 | Chelate           | N-Donor           |
| 996  | WENXIY   | 1242 | Discrete Molecule      | Seesaw               | 4 | Non-Chelate       | O-Donor           |
| 997  | WENXOE   | 1243 | Discrete Molecule      | T-Shape              | 6 | Non-Chelate       | O-Donor           |
| 998  | WEQMEL   | 1244 | Polymer Through Ligand | Square Pyramid       | 5 | Non-Chelate       | N-Donor           |
|      |          | 1245 | Polymer Through Ligand | Seesaw               | 4 | Non-Chelate       | N-Donor           |
| 999  | WIBJAU   | 1246 | Discrete Molecule      | Tetrahedral          | 4 | Metal Halide Only | Chlorine          |
| 1000 | WICWOU   | 1247 | Discrete Molecule      | T-Shape              | 6 | Non-Chelate       | O-Donor           |
| 1001 | WICWOU01 | 1248 | Discrete Molecule      | T-Shape              | 6 | Non-Chelate       | O-Donor           |
| 1002 | WIJGAY   | 1249 | Discrete Molecule      | D-Trigonal Bipyramid | 5 | Non-Chelate       | S-Donor   N-Donor |
| 1003 | WILSUG   | 1250 | Polymer Through Anion  | Tetrahedral          | 4 | Non-Chelate       | C-Donor           |
|      |          | 1251 | Polymer Through Ligand | Seesaw               | 4 | Metal Halide Only | Chlorine          |
| 1004 | WILTAN   | 1252 | Polymer Through Anion  | Seesaw               | 4 | Non-Chelate       | C-Donor           |
|      |          | 1253 | Polymer Through Ligand | Seesaw               | 4 | Metal Halide Only | Chlorine          |
| 1005 | WIMNUD   | 1254 | Polymer Through Anion  | D-Octahedral         | 6 | Non-Chelate       | N-Donor           |
|      |          | 1255 | Polymer Through Ligand | Seesaw               | 4 | Non-Chelate       | S-Donor           |
| 1006 | WIMPAL   | 1256 | Polymer Through Ligand | Seesaw               | 4 | Non-Chelate       | N-Donor           |
| 1007 | WIMPEP   | 1257 | Polymer Through Ligand | Seesaw               | 4 | Non-Chelate       | N-Donor           |
| 1008 | WIRJEO   | 1258 | Polymer Through Ligand | Seesaw               | 4 | Non-Chelate       | N-Donor           |
| 1009 | WIRJIS   | 1259 | Polymer Through Ligand | Seesaw               | 4 | Non-Chelate       | N-Donor           |
| 1010 | WIRJOY   | 1260 | Polymer Through Ligand | Seesaw               | 4 | Non-Chelate       | N-Donor           |
| 1011 | WIRKAJ   | 1261 | Discrete Molecule      | T-Shape              | 4 | Chelate           | O-Donor           |
| 1012 | WIZLIC   | 1262 | Polymer Through Anion  | Trigonal Bipyramid   | 5 | Metal Halide Only | Chlorine          |
|      |          | 1263 | Polymer Through Anion  | Square Pyramid       | 5 | Non-Chelate       | N-Donor           |
|      |          | 1264 | Polymer Through Anion  | Octahedral           | 6 | Metal Halide Only | Chlorine          |
| 1013 | WODCUN   | 1265 | Discrete Molecule      | Seesaw               | 4 | Non-Chelate       | S-Donor           |
| 1014 | WOGPUE   | 1266 | Discrete Molecule      | Seesaw               | 4 | Chelate           | N-Donor           |
| 1015 | WOHQAL   | 1267 | Discrete Molecule      | Tetrahedral          | 4 | Metal Halide Only | Chlorine          |
| 1016 | WONKEP   | 1268 | Dimer Through Anion    | Square Pyramid       | 5 | Non-Chelate       | P-Donor   O-Donor |
| 1017 | WOPKET   | 1269 | Discrete Molecule      | Seesaw               | 4 | Chelate           | N-Donor           |
| 1018 | WOVMOJ   | 1270 | Polymer Through Anion  | Trigonal Bipyramid   | 5 | Non-Chelate       | N-Donor           |
| 1019 | WOVWEL   | 1271 | Discrete Molecule      | Seesaw               | 4 | Chelate           | N-Donor           |
| 1020 | WOVWOV   | 1272 | Discrete Molecule      | T-Shape              | 5 | Chelate           | N-Donor   O-Donor |
| 1021 | WOWGUM   | 1273 | Discrete Molecule      | Seesaw               | 4 | Chelate           | N-Donor           |
| 1022 | WUNXIO   | 1274 | Dimer Through Ligand   | Seesaw               | 4 | Non-Chelate       | N-Donor           |
| 1023 | WUQLEA   | 1275 | Polymer Through Anion  | D-Octahedral         | 6 | Non-Chelate       | N-Donor           |
| 1024 | WURPIJ   | 1276 | Discrete Molecule      | Trigonal             | 3 | Metal Halide Only | Chlorine          |
| 1025 | WUSHEZ   | 1277 | Discrete Molecule      | Seesaw               | 4 | Chelate           | N-Donor           |
| 1026 | WUZHAB   | 1278 | Polymer Through Anion  | Trigonal Bipyramid   | 5 | Chelate           | N-Donor           |
|      |          | 1279 | Polymer Through Ligand | Trigonal Bipyramid   | 5 | Chelate           | N-Donor           |
|      |          | 1280 | Polymer Through Anion  | T-Shape              | 5 | Chelate           | N-Donor           |
|      |          | 1281 | Polymer Through Ligand | T-Shape              | 5 | Chelate           | N-Donor           |
|      |          | 1282 | Polymer Through Anion  | Tetrahedral          | 4 | Metal Halide Only | Chlorine          |
| 1027 | XAFREB   | 1283 | Discrete Molecule      | Tetrahedral          | 4 | Metal Halide Only | Chlorine          |
| 1028 | XAHROO   | 1284 | Dimer Through Ligand   | Seesaw               | 4 | Non-Chelate       | N-Donor           |
| 1029 | XAHRUU   | 1285 | Dimer Through Ligand   | Seesaw               | 4 | Non-Chelate       | N-Donor           |
| 1030 | XAHSOP   | 1286 | Polymer Through Ligand | D-Octahedral         | 6 | Non-Chelate       | N-Donor           |
| 1031 | XAHTAE   | 1287 | Discrete Molecule      | T-Shape              | 5 | Chelate           | N-Donor   O-Donor |
| 1032 | XAKMAZ   | 1288 | Discrete Molecule      | Seesaw               | 4 | Chelate           | N-Donor           |
| 1033 | XAKZOA   | 1289 | Discrete Molecule      | Seesaw               | 4 | Non-Chelate       | N-Donor           |
| 1034 | XECPIG   | 1290 | Polymer Through Anion  | Tetrahedral          | 4 | Metal Halide Only | Chlorine          |

|      |        |      |                        |                    |   |                   |           |         |
|------|--------|------|------------------------|--------------------|---|-------------------|-----------|---------|
| 1035 | XECVUY | 1291 | Discrete Molecule      | T-Shape            | 5 | Chelate           | N-Donor   | O-Donor |
| 1036 | XEJDEV | 1292 | Discrete Molecule      | Tetrahedral        | 4 | Metal Halide Only | Chlorine  |         |
| 1037 | XEKZIX | 1293 | Discrete Molecule      | T-Shape            | 6 | Chelate           | S-Donor   | O-Donor |
| 1038 | XELQOV | 1294 | Polymer Through Anion  | Square Pyramid     | 5 | Non-Chelate       | S-Donor   |         |
| 1039 | XEMTUG | 1295 | Discrete Molecule      | Tetrahedral        | 4 | Metal Halide Only | Chlorine  |         |
| 1040 | XEMVIW | 1296 | Dimer Through Anion    | Square Pyramid     | 4 | Chelate           | S-Donor   |         |
| 1041 | XEQZAV | 1297 | Trimer Through Anion   | Seesaw             | 4 | Chelate           | N-Donor   |         |
|      |        | 1298 | Trimer Through Anion   | Square Planar      | 4 | Metal Halide Only | Chlorine  |         |
| 1042 | XEZNUJ | 1299 | Dimer Through Ligand   | Seesaw             | 4 | Non-Chelate       | P-Donor   |         |
| 1043 | XIGWUG | 1300 | Discrete Molecule      | Seesaw             | 4 | Non-Chelate       | N-Donor   |         |
| 1044 | XINLUD | 1301 | Discrete Molecule      | Tetrahedral        | 4 | Metal Halide Only | Chlorine  |         |
| 1045 | XINVIB | 1302 | Discrete Molecule      | Tetrahedral        | 4 | Non-Chelate       | N-Donor   |         |
| 1046 | XIPCAB | 1303 | Discrete Molecule      | T-Shape            | 5 | Chelate           | S-Donor   | N-Donor |
| 1047 | XISCEI | 1304 | Discrete Molecule      | Seesaw             | 4 | Chelate           | P-Donor   |         |
| 1048 | XIVKIW | 1305 | Dimer Through Ligand   | Trigonal           | 3 | Non-Chelate       | N-Donor   |         |
| 1049 | XIVKOC | 1306 | Dimer Through Ligand   | Trigonal           | 3 | Non-Chelate       | N-Donor   |         |
| 1050 | XIYBOX | 1307 | Discrete Molecule      | Seesaw             | 4 | Chelate           | N-Donor   | O-Donor |
| 1051 | XIYBUD | 1308 | Discrete Molecule      | T-Shape            | 5 | Chelate           | N-Donor   | O-Donor |
| 1052 | XIYCAK | 1309 | Discrete Molecule      | T-Shape            | 5 | Chelate           | N-Donor   | O-Donor |
| 1053 | XIYCEO | 1310 | Discrete Molecule      | T-Shape            | 5 | Chelate           | N-Donor   | O-Donor |
| 1054 | XOKYOL | 1311 | Polymer Through Anion  | Tetrahedral        | 4 | Metal Halide Only | Chlorine  |         |
| 1055 | XORPUP | 1312 | Dimer Through Anion    | Seesaw             | 4 | Non-Chelate       | S-Donor   |         |
| 1056 | XOVGOE | 1313 | Dimer Through Ligand   | T-Shape            | 5 | Non-Chelate       | N-Donor   | O-Donor |
| 1057 | XOZZUI | 1314 | Polymer Through Ligand | Square Planar      | 4 | Non-Chelate       | O-Donor   | N-Donor |
|      |        | 1315 | Polymer Through Anion  | Square Planar      | 4 | Non-Chelate       | O-Donor   |         |
| 1058 | XUBLUD | 1316 | Polymer Through Ligand | Trigonal Bipyramid | 5 | Non-Chelate       | N-Donor   |         |
|      |        | 1317 | Polymer Through Anion  | Trigonal Bipyramid | 5 | Non-Chelate       | N-Donor   |         |
| 1059 | XUBMAK | 1318 | Dimer Through Ligand   | Seesaw             | 4 | Non-Chelate       | N-Donor   |         |
| 1060 | XUBMEO | 1319 | Discrete Molecule      | Seesaw             | 4 | Non-Chelate       | N-Donor   |         |
| 1061 | XUBZEB | 1320 | Polymer Through Anion  | Square Pyramid     | 5 | Non-Chelate       | N-Donor   |         |
|      |        | 1321 | Polymer Through Ligand | Square Pyramid     | 5 | Non-Chelate       | N-Donor   |         |
| 1062 | XUCDEF | 1322 | Discrete Molecule      | Trigonal Pyramid   | 3 | Metal Halide Only | Chlorine  |         |
|      |        | 1323 | Discrete Molecule      | Tetrahedral        | 4 | Metal Halide Only | Chlorine  |         |
| 1063 | XUFDEJ | 1324 | Polymer Through Ligand | Seesaw             | 4 | Non-Chelate       | N-Donor   |         |
| 1064 | XUGDUZ | 1325 | Discrete Molecule      | Trigonal Pyramid   | 3 | Metal Halide Only | Chlorine  |         |
|      |        | 1326 | Discrete Molecule      | Tetrahedral        | 4 | Metal Halide Only | Chlorine  |         |
| 1065 | XUKSAZ | 1327 | Discrete Molecule      | D-Square Pyramid   | 5 | Metal to Metal    | Osmium    |         |
| 1066 | XULGEQ | 1328 | Dimer Through Anion    | Seesaw             | 4 | Metal Halide Only | Chlorine  |         |
|      |        | 1329 | Dimer Through Anion    | Trigonal Bipyramid | 5 | Non-Chelate       | N-Donor   |         |
| 1067 | YABCEL | 1330 | Trimer Through Anion   | Square Planar      | 4 | Metal Halide Only | Chlorine  |         |
|      |        | 1331 | Trimer Through Anion   | Seesaw             | 4 | Chelate           | N-Donor   |         |
| 1068 | YACDUD | 1332 | Dimer Through Ligand   | Seesaw             | 4 | Non-Chelate       | N-Donor   |         |
| 1069 | YACGUF | 1333 | Discrete Molecule      | T-Shape            | 5 | Chelate           | S-Donor   | N-Donor |
| 1070 | YATMUD | 1334 | Polymer Through Ligand | Seesaw             | 4 | Non-Chelate       | N-Donor   |         |
| 1071 | YATPUG | 1335 | Polymer Through Ligand | D-Octahedral       | 6 | Non-Chelate       | N-Donor   |         |
|      |        | 1336 | Polymer Through Anion  | D-Octahedral       | 6 | Non-Chelate       | N-Donor   |         |
| 1072 | YAVJAI | 1337 | Polymer Through Anion  | D-Octahedral       | 6 | Non-Chelate       | N-Donor   |         |
| 1073 | YAWNOZ | 1338 | Dimer Through Anion    | Tetrahedral        | 4 | Metal Halide Only | Chlorine  |         |
| 1074 | YAWNUF | 1339 | Discrete Molecule      | Trigonal           | 3 | Metal Halide Only | Chlorine  |         |
| 1075 | YEJDOH | 1340 | Discrete Molecule      | Seesaw             | 4 | Metal to Metal    | Tellurium |         |
| 1076 | YESROD | 1341 | Dimer Through Ligand   | Trigonal Pyramid   | 4 | Non-Chelate       | N-Donor   | S-Donor |
| 1077 | YEXNUK | 1342 | Dimer Through Anion    | Seesaw             | 4 | Non-Chelate       | P-Donor   |         |
| 1078 | YEZGEP | 1343 | Polymer Through Anion  | D-Prism            | 6 | Non-Chelate       | O-Donor   |         |
|      |        | 1344 | Polymer Through Ligand | T-Shape            | 5 | Non-Chelate       | O-Donor   |         |
|      |        | 1345 | Polymer Through Ligand | Seesaw             | 4 | Metal Halide Only | Chlorine  |         |
|      |        | 1346 | Polymer Through Ligand | T-Shape            | 3 | Metal Halide Only | Chlorine  |         |
| 1079 | YIJKAE | 1347 | Dimer Through Anion    | Square Pyramid     | 5 | Non-Chelate       | C-Donor   | O-Donor |
| 1080 | YIPMOZ | 1348 | Discrete Molecule      | T-Shape            | 5 | Non-Chelate       | O-Donor   |         |
| 1081 | YIQPAQ | 1349 | Dimer Through Anion    | Trigonal Pyramid   | 4 | Metal Halide Only | Chlorine  |         |
| 1082 | YISPOF | 1350 | Trimer Through Anion   | Tetrahedral        | 4 | Metal Halide Only | Chlorine  |         |
| 1083 | YITPOG | 1351 | Polymer Through Ligand | T-Shape            | 6 | Non-Chelate       | O-Donor   |         |
| 1084 | YITPUM | 1352 | Polymer Through Anion  | Seesaw             | 4 | Non-Chelate       | O-Donor   |         |

|      |          |      |                         |                    |   |                   |          |         |
|------|----------|------|-------------------------|--------------------|---|-------------------|----------|---------|
| 1085 | YITRAU   | 1353 | Polymer Through Anion   | Seesaw             | 4 | Non-Chelate       | O-Donor  |         |
| 1086 | YIYWIN   | 1354 | Discrete Molecule       | Seesaw             | 4 | Non-Chelate       | O-Donor  | C-Donor |
| 1087 | YIZTUW   | 1355 | Dimer through anion     | Trigonal Bipyramid | 5 | Chelate           | N-Donor  |         |
| 1088 | YOCYOG   | 1356 | Discrete molecule       | T-Shape            | 5 | Chelate           | N-Donor  | O-Donor |
| 1089 | YOGJEL   | 1357 | Discrete Molecule       | Tetrahedral        | 4 | Metal Halide Only |          |         |
| 1090 | YOWLUR   | 1358 | Tetramer Through Ligand | Seesaw             | 4 | Non-Chelate       | O-Donor  |         |
|      |          | 1359 | Tetramer Through Ligand | D-Square Pyramid   | 5 | Non-Chelate       | O-Donor  | N-Donor |
| 1091 | YUBYEZ   | 1360 | Dimer Through Anion     | Tetrahedral        | 4 | Metal Halide Only | Chlorine |         |
| 1092 | YUBYID   | 1361 | Tetramer Through Anion  | Tetrahedral        | 4 | Metal Halide Only | Chlorine |         |
| 1093 | YUCBAZ   | 1362 | Dimer Through Ligand    | D-Tetrahedral (Py) | 4 | Chelate           | S-Donor  |         |
| 1094 | YUNLAV   | 1363 | Polymer through ligand  | Seesaw             | 4 | Non-Chelate       | N-Donor  |         |
|      |          | 1364 | Polymer Through Anion   | D-Tetrahedral (Py) | 4 | Non-Chelate       | N-Donor  |         |
| 1095 | YUTNIM   | 1365 | Discrete Molecule       | Seesaw             | 4 | Chelate           | N-Donor  |         |
|      |          | 1366 | Dimer Through Anion     | D-Square Pyramid   | 5 | Chelate           | N-Donor  |         |
| 1096 | YUTNOS   | 1367 | Dimer Through Anion     | D-Square Pyramid   | 5 | Chelate           | N-Donor  |         |
| 1097 | YUTNUY   | 1368 | Discrete Molecule       | Seesaw             | 4 | Chelate           | N-Donor  |         |
| 1098 | ZAMHUQ   | 1369 | Dimer Through Anion     | Tetrahedral        | 4 | Metal Halide Only | Chlorine |         |
| 1099 | ZASLOU   | 1370 | Polymer Through Anion   | Seesaw             | 4 | Non-Chelate       | S-Donor  |         |
|      |          | 1371 | Discrete Molecule       | Seesaw             | 4 | Non-Chelate       | S-Donor  |         |
| 1100 | ZEFQUY   | 1372 | Polymer Through Ligand  | Seesaw             | 4 | Non-Chelate       | N-Donor  |         |
| 1101 | ZEPSEU   | 1373 | Polymer Through Anion   | Square Pyramid     | 5 | Chelate           | N-Donor  | O-Donor |
|      |          | 1374 | Polymer Through Anion   | Seesaw             | 4 | Non-Chelate       | O-Donor  |         |
| 1102 | ZEPSIY   | 1375 | Dimer Through Anion     | Seesaw             | 4 | Chelate           | O-Donor  | N-Donor |
|      |          | 1376 | Dimer Through Anion     | Trigonal           | 3 | Metal Halide Only | Chlorine |         |
| 1103 | ZESPOC   | 1377 | Dimer Through Anion     | D-Tetrahedral (Py) | 4 | Non-Chelate       | C-Donor  |         |
| 1104 | ZIGPIQ   | 1378 | Discrete Molecule       | T-Shape            | 5 | Non-Chelate       | N-Donor  | S-Donor |
| 1105 | ZITSOK   | 1379 | Tetramer Through Anion  | Seesaw             | 4 | Metal Halide Only | Chlorine |         |
|      |          | 1380 | Tetramer Through Anion  | Seesaw             | 4 | Non-Chelate       | C-Donor  |         |
| 1106 | ZOGMIT   | 1381 | Discrete Molecule       | Seesaw             | 4 | Non-Chelate       | N-Donor  |         |
| 1107 | ZUFHUF   | 1382 | Discrete Molecule       | Seesaw             | 4 | Non-Chelate       | N-Donor  |         |
| 1108 | ZUFWEE   | 1383 | Polymer Through Ligand  | Trigonal Bipyramid | 5 | Non-Chelate       | C-Donor  | O-Donor |
|      |          | 1384 | Polymer Through Anion   | Square Pyramid     | 5 | Non-Chelate       | C-Donor  | O-Donor |
| 1109 | ZUNTAF   | 1385 | Polymer Through Anion   | D-Octahedral       | 6 | Non-Chelate       | N-Donor  |         |
| 1110 | ZUPCOC   | 1386 | Oligomer Through Ligand | Seesaw             | 4 | Chelate           | O-Donor  |         |
| 1111 | ZUPCUI   | 1387 | Polymer through ligand  | Seesaw             | 4 | Chelate           | O-Donor  |         |
|      |          | 1388 | polymer through ligand  | D-Octahedral       | 6 | Chelate           | O-Donor  |         |
| 1112 | ZZZLCI01 | 1389 | Polymer through anion   | D-Octahedral       | 6 | Non-Chelate       | N-Donor  |         |

## S28. CSD-Analysis for HgBr<sub>2</sub> Compounds

| Number | Ref. Code | Hits | Polymerization Mode    | Geometry             | C.N. | Chelation Mode    | Donor Atom of Ligand |         |          |
|--------|-----------|------|------------------------|----------------------|------|-------------------|----------------------|---------|----------|
| 1      | AQOFUJ    | 1    | Discrete Molecule      | Tetrahedral          | 4    | Metal Halide Only | Bromine              |         |          |
|        |           | 2    | Discrete Molecule      | D-Trigonal Bipyramid | 5    | Chelate           | C-Donor              | O-Donor | Se-Donor |
| 2      | ASAMEO    | 3    | Polymer Through Ligand | Seesaw               | 4    | Non-Chelate       | S-Donor              |         |          |
| 3      | ATAWOJ    | 4    | Discrete Molecule      | T-Shape              | 5    | Chelate           | O-Donor              | N-Donor |          |
| 4      | AVIZAI    | 5    | Discrete Molecule      | D-Trigonal Bipyramid | 5    | Chelate           | N-Donor              |         |          |
| 5      | IVOKIP    | 6    | Discrete Molecule      | Seesaw               | 4    | Non-Chelate       | N-Donor              |         |          |
| 6      | ORUYUX    | 7    | Polymer Through Ligand | Seesaw               | 4    | Non-Chelate       | N-Donor              |         |          |
| 7      | ORUZAE    | 8    | Dimer Through Anion    | Seesaw               | 4    | Metal Halide Only | Bromine              |         |          |
| 8      | OSOGOOU   | 9    | Polymer Through Ligand | Seesaw               | 4    | Non-Chelate       | N-Donor              |         |          |
| 9      | ACNHGB    | 10   | Discrete Molecule      | Linear               | 2    | Metal Halide Only | Bromine              |         |          |
|        |           | 11   | Discrete Molecule      | T-Shape              | 3    | Non-Chelate       | N-Donor              |         |          |
| 10     | ACOOZUN   | 12   | Polymer Through Ligand | Seesaw               | 4    | Non-Chelate       | N-Donor              |         |          |
| 11     | ADOKAG    | 13   | Polymer Through Anion  | D-Square Pyramid     | 5    | Non-Chelate       | N-Donor              |         |          |
| 12     | ADOKEK    | 14   | Polymer Through Anion  | D-Octahedral         | 6    | Non-Chelate       | N-Donor              |         |          |
| 13     | ADOKIO    | 15   | Discrete Molecule      | Seesaw               | 4    | Non-Chelate       | N-Donor              |         |          |
| 14     | AGEWUF    | 16   | Discrete Molecule      | Tetrahedral          | 4    | Metal Halide Only | Bromine              |         |          |
| 15     | AHIMAH    | 17   | Polymer Through Anion  | Trigonal Bipyramid   | 5    | Metal Halide Only | Bromine              |         |          |
| 16     | AHOLUE    | 18   | Discrete Molecule      | Seesaw               | 4    | Non-Chelate       | Se-Donor             |         |          |
| 17     | AJAJOL    | 19   | Dimer Through Anion    | Seesaw               | 4    | Non-Chelate       | Se-Donor             |         |          |
| 18     | AJIFIK    | 20   | Dimer Through Anion    | Seesaw               | 4    | Non-Chelate       | C-Donor              |         |          |

|    |          |    |                        |                         |   |                   |         |         |
|----|----------|----|------------------------|-------------------------|---|-------------------|---------|---------|
| 19 | AJIKAG   | 21 | Discrete Molecule      | Tetrahedral             | 4 | Metal Halide Only | Bromine |         |
| 20 | AKULEX   | 22 | Dimer Through Anion    | Seesaw                  | 4 | Chelate           | P-Donor |         |
| 21 | AKULOH   | 23 | Dimer Through Anion    | Seesaw                  | 4 | Chelate           | P-Donor |         |
| 22 | AMODEL   | 24 | Discrete Molecule      | Seesaw                  | 4 | Chelate           | N-Donor |         |
| 23 | APULON   | 25 | Discrete Molecule      | D-Octahedral            | 6 | Chelate           | N-Donor |         |
| 24 | AQAWIA   | 26 | Dimer Through Anion    | D-Tetrahedral (Pyramid) | 4 | Non-Chelate       | N-Donor |         |
| 25 | AQEFAF   | 27 | Discrete Molecule      | Tetrahedral             | 4 | Metal Halide Only | Bromine |         |
| 26 | AQEFOT   | 28 | Discrete Molecule      | Seesaw                  | 4 | Non-Chelate       | N-Donor |         |
| 27 | AQEGEK   | 29 | Polymer Through Ligand | Seesaw                  | 4 | Non-Chelate       | N-Donor |         |
| 28 | AQEGUA   | 30 | Polymer Through Ligand | Seesaw                  | 4 | Non-Chelate       | N-Donor |         |
| 29 | ARUJOM   | 31 | Discrete Molecule      | T-Shape                 | 3 | Chelate           | P-Donor |         |
|    |          | 32 | Discrete Molecule      | Tetrahedral             | 4 | Metal Halide Only | Bromine |         |
| 30 | ASUROW   | 33 | Discrete Molecule      | Tetrahedral             | 4 | Metal Halide Only | Bromine |         |
| 31 | ASURUC   | 34 | Discrete Molecule      | Tetrahedral             | 4 | Metal Halide Only | Bromine |         |
| 32 | AVISEE   | 35 | Discrete Molecule      | Tetrahedral             | 4 | Metal Halide Only | Bromine |         |
| 33 | AWUCOL   | 36 | Polymer Through Ligand | Seesaw                  | 4 | Non-Chelate       | N-Donor |         |
| 34 | AXEDEM   | 37 | Dimer Through Anion    | Seesaw                  | 4 | Non-Chelate       | C-Donor |         |
| 35 | BAHJUR   | 38 | Polymer Through Ligand | Seesaw                  | 4 | Non-Chelate       | N-Donor |         |
| 36 | BAKPOS   | 39 | Polymer Through Ligand | Seesaw                  | 4 | Non-Chelate       | N-Donor |         |
| 37 | BAXPOG   | 40 | Polymer Through Ligand | Seesaw                  | 4 | Non-Chelate       | N-Donor |         |
| 38 | BBPYHG   | 41 | Dimer Through Anion    | D-Square Pyramid        | 5 | Chelate           | N-Donor |         |
| 39 | BBPYHG01 | 42 | Dimer Through Anion    | D-Square Pyramid        | 5 | Chelate           | N-Donor |         |
| 40 | BDMPHG   | 43 | Polymer Through Anion  | D-Tetrahedral (Pyramid) | 4 | Non-Chelate       | N-Donor |         |
| 41 | BEJLAD   | 44 | Discrete Molecule      | Seesaw                  | 4 | Non-Chelate       | N-Donor |         |
| 42 | BENJOT   | 45 | Discrete Molecule      | Seesaw                  | 4 | Chelate           | P-Donor |         |
| 43 | BENLUC   | 46 | Polymer Through Ligand | Seesaw                  | 4 | Non-Chelate       | N-Donor | S-Donor |
| 44 | BEVCIQ   | 47 | Discrete Molecule      | Seesaw                  | 4 | Chelate           | N-Donor |         |
| 45 | BEVCIQ01 | 48 | Discrete Molecule      | Seesaw                  | 4 | Chelate           | N-Donor |         |
| 46 | BEZVOT   | 49 | Discrete Molecule      | Seesaw                  | 4 | Non-Chelate       | O-Donor | C-Donor |
| 47 | BHGETC   | 50 | Discrete Molecule      | Seesaw                  | 4 | Non-Chelate       | S-Donor |         |
|    |          | 51 | Discrete Molecule      | D-Square Pyramid        | 5 | Non-Chelate       | S-Donor |         |
| 48 | BHGIRP   | 52 | Dimer Through Anion    | T-Shape                 | 3 | M-M   Non-Chelate | Iridium |         |
| 49 | BMTUHG   | 53 | Dimer Through Anion    | Seesaw                  | 4 | Non-Chelate       | S-Donor |         |
| 50 | BONDOX   | 54 | Discrete Molecule      | Seesaw                  | 4 | Chelate           | O-Donor |         |
| 51 | BOPGOC11 | 55 | Discrete Molecule      | Tetrahedral             | 4 | Metal Halide Only | Bromine |         |
| 52 | BOQTUX   | 56 | Discrete Molecule      | D-Tetrahedral (Pyramid) | 4 | Non-Chelate       | P-Donor |         |
| 53 | BOQVAF   | 57 | Discrete Molecule      | Seesaw                  | 4 | Non-Chelate       | P-Donor |         |
| 54 | BPACHG   | 58 | Polymer Through Ligand | D-Square Pyramid        | 5 | Non-Chelate       | O-Donor | N-Donor |
|    |          | 59 | Dimer Through Anion    | D-Square Pyramid        | 5 | Non-Chelate       | O-Donor | N-Donor |
| 55 | BPOHGB   | 60 | Discrete Molecule      | T-Shape                 | 6 | Chelate           | O-Donor |         |
| 56 | BRRUHG   | 61 | Dimer Through Anion    | Seesaw                  | 4 | M-M   Non-Chelate | Rhodium |         |
| 57 | BTETHG   | 62 | Discrete Molecule      | Seesaw                  | 4 | Chelate           | S-Donor |         |
| 58 | BUKYEN   | 63 | Discrete Molecule      | T-Shape                 | 3 | Non-Chelate       | N-Donor |         |
| 59 | BUKYIR   | 64 | Discrete Molecule      | T-Shape                 | 3 | Non-Chelate       | N-Donor |         |
| 60 | BULZEN01 | 65 | Discrete Molecule      | Seesaw                  | 4 | Non-Chelate       | P-Donor |         |
| 61 | BUTCCU   | 66 | Dimer Through Anion    | Tetrahedral             | 4 | Metal Halide Only | Bromine |         |
| 62 | BUTCCU01 | 67 | Dimer Through Anion    | Tetrahedral             | 4 | Metal Halide Only | Bromine |         |
| 63 | BUTLOS   | 68 | Dimer Through Anion    | D-Square Pyramid        | 5 | Chelate           | N-Donor |         |
| 64 | BUTLUY   | 69 | Dimer Through Anion    | D-Square Pyramid        | 5 | Chelate           | N-Donor |         |
| 65 | BUVZOJ   | 70 | Dimer Through Anion    | Seesaw                  | 4 | Non-Chelate       | S-Donor |         |
| 66 | BUWBIE   | 71 | Dimer Through Anion    | Tetrahedral             | 4 | Metal Halide Only | Bromine |         |
| 67 | BUWBOK   | 72 | Dimer Through Anion    | Tetrahedral             | 4 | Metal Halide Only | Bromine |         |
| 68 | CABFET   | 73 | Dimer Through Anion    | Seesaw                  | 4 | Non-Chelate       | S-Donor |         |
| 69 | CCGBTC   | 74 | Dimer Through Anion    | Tetrahedral             | 4 | Metal Halide Only | Bromine |         |
| 70 | CEKJAF   | 75 | Dimer Through Anion    | D-Tetrahedral (Pyramid) | 4 | Non-Chelate       | N-Donor |         |
| 71 | CEKJIN   | 76 | Discrete Molecule      | T-Shape                 | 3 | Non-Chelate       | N-Donor |         |
| 72 | CIBDUN   | 77 | Polymer Through Anion  | Square Pyramid          | 5 | Non-Chelate       | O-Donor |         |
| 73 | CIDLUY   | 78 | Polymer Through Anion  | Square Pyramid          | 5 | Non-Chelate       | N-Donor |         |
| 74 | CIDMIN   | 79 | Polymer Through Anion  | D-Octahedral            | 6 | Non-Chelate       | N-Donor |         |
| 75 | CIDNAG   | 80 | Discrete Molecule      | T-Shape                 | 3 | Non-Chelate       | N-Donor |         |
| 76 | CIDNEK   | 81 | Polymer Through Anion  | D-Octahedral            | 6 | Non-Chelate       | N-Donor |         |
| 77 | CINZEF   | 82 | Polymer Through Anion  | D-Octahedral            | 6 | Non-Chelate       | N-donor | O-donor |

|     |          |     |                         |                         |   |                   |         |         |
|-----|----------|-----|-------------------------|-------------------------|---|-------------------|---------|---------|
|     |          | 83  | Polymer Through Ligand  | D-Octahedral            | 6 | Non-Chelate       | N-donor | O-donor |
| 78  | CIZNII   | 84  | Discrete Molecule       | Seesaw                  | 4 | Non-Chelate       | P-Donor |         |
| 79  | COLSAY   | 85  | Polymer Through Ligand  | Seesaw                  | 4 | Non-Chelate       | N-Donor |         |
| 80  | COTSAH   | 86  | Discrete Molecule       | Seesaw                  | 4 | Chelate           | N-Donor |         |
| 81  | COYLOS   | 87  | Discrete Molecule       | Seesaw                  | 4 | Non-Chelate       | O-Donor |         |
| 82  | COYWET   | 88  | Dimer Through Ligand    | Seesaw                  | 4 | Chelate           | N-Donor |         |
| 83  | CUMXIT   | 89  | Dimer Through Ligand    | Seesaw                  | 4 | Chelate           | N-Donor |         |
| 84  | CUSBAU   | 90  | Discrete Molecule       | T-Shape                 | 5 | Chelate           | N-donor |         |
| 85  | CUSBOI   | 91  | Discrete Molecule       | T-Shape                 | 5 | Chelate           | N-Donor |         |
| 86  | CUSREO   | 92  | Polymer Through Ligand  | Seesaw                  | 4 | Non-Chelate       | N-Donor |         |
| 87  | CUSRUE   | 93  | Dimer Through Ligand    | Seesaw                  | 4 | Non-Chelate       | N-Donor |         |
| 88  | CUXMEP   | 94  | Dimer Through Anion     | D-Tetrahedral (Pyramid) | 4 | Non-Chelate       | C-Donor |         |
| 89  | CUYFEI   | 95  | Dimer Through Ligand    | Seesaw                  | 4 | Non-Chelate       | N-Donor | O-Donor |
| 90  | DAHUIW   | 96  | Discrete Molecule       | Seesaw                  | 4 | Chelate           | N-Donor |         |
| 91  | DAXNUN   | 97  | Polymer Through Ligand  | Seesaw                  | 4 | Non-Chelate       | S-Donor |         |
| 92  | DAXPID   | 98  | Polymer Through Ligand  | Seesaw                  | 4 | Non-Chelate       | S-Donor |         |
|     |          | 99  | Polymer Through Anion   | Seesaw                  | 4 | Non-Chelate       | S-Donor |         |
| 93  | DAZDAK   | 100 | Polymer Through Ligand  | D-Tetrahedral (Pyramid) | 4 | Non-Chelate       | S-donor |         |
|     |          | 101 | Polymer Through Anion   | D-Tetrahedral (Pyramid) | 4 | Non-Chelate       | S-donor |         |
| 94  | DEBMAY   | 102 | Polymer Through Anion   | Trigonal Bipyramid      | 5 | Metal Halide Only | Bromine |         |
| 95  | DECFEI   | 103 | Discrete Molecule       | T-Shape                 | 5 | Chelate           | N-Donor |         |
| 96  | DECFUO   | 104 | Polymer Through Anion   | T-Shape                 | 5 | Chelate           | N-donor |         |
| 97  | DEFYET   | 105 | Dimer Through Ligand    | T-Shape                 | 3 | Non-Chelate       | S-Donor |         |
| 98  | DEGJOP   | 106 | Dimer Through Ligand    | Seesaw                  | 4 | Non-Chelate       | S-Donor |         |
| 99  | DEJZIB   | 107 | Tetramer Through Ligand | T-Shape                 | 3 | Non-Chelate       | O-Donor |         |
|     |          | 108 | Tetramer Through Anion  | Square Pyramid          | 5 | Non-Chelate       | N-Donor |         |
| 100 | DENLAK   | 109 | Discrete Molecule       | Tetrahedral             | 4 | Metal Halide Only | Bromine |         |
| 101 | DEPFEK   | 110 | Dimer Through Ligand    | Seesaw                  | 4 | Non-Chelate       | N-Donor |         |
| 102 | DEPVIE   | 111 | Discrete Molecule       | Tetrahedral             | 4 | Metal Halide Only | Bromine |         |
| 103 | DICMEI   | 112 | Discrete Molecule       | Seesaw                  | 4 | Non-Chelate       | S-Donor |         |
| 104 | DIQPUQ   | 113 | Polymer Through Anion   | Seesaw                  | 4 | Metal Halide Only | Bromine |         |
| 105 | DITCOY   | 114 | Discrete Molecule       | Seesaw                  | 4 | Chelate           | N-Donor |         |
| 106 | DIVZAJ   | 115 | Dimer Through Anion     | D-Tetrahedral (Pyramid) | 4 | Non-Chelate       | P-Donor |         |
| 107 | DIYVEM   | 116 | Discrete Molecule       | T-Shape                 | 5 | Chelate           | N-Donor | S-Donor |
| 108 | DIZSOV   | 117 | Dimer Through Ligand    | Seesaw                  | 4 | Chelate           | N-donor |         |
| 109 | DUFHUH10 | 118 | Discrete Molecule       | Tetrahedral             | 4 | Metal Halide Only | Bromine |         |
| 110 | DUKTAF   | 119 | Discrete Molecule       | Tetrahedral             | 4 | Metal Halide Only | Bromine |         |
| 111 | DULWAJ   | 120 | Polymer Through Anion   | D-Octahedral            | 6 | Non-Chelate       | N-Donor |         |
| 112 | DUWSOE   | 121 | Polymer Through Ligand  | Seesaw                  | 4 | Non-Chelate       | N-Donor |         |
| 113 | DUWSUK   | 122 | Polymer Through Ligand  | Seesaw                  | 4 | Non-Chelate       | N-Donor |         |
| 114 | DUWVIC   | 123 | Dimer Through Anion     | Seesaw                  | 4 | Non-Chelate       | C-Donor |         |
|     |          | 124 | Dimer Through Anion     | D-Trigonal Bipyramid    | 5 | Non-Chelate       | C-Donor | O-Donor |
|     |          | 125 | Discrete Molecule       | Tetrahedral             | 4 | Metal Halide Only | Bromine |         |
| 115 | ECOGUZ   | 126 | Discrete Molecule       | Seesaw                  | 4 | Chelate           | S-Donor |         |
| 116 | EDUFOA   | 127 | Polymer Through Anion   | Octahedral              | 6 | Chelate           | N-Donor |         |
| 117 | EDUGOB   | 128 | Discrete Molecule       | Tetrahedral             | 4 | Metal Halide Only | Bromine |         |
| 118 | EDUVOP   | 129 | Discrete Molecule       | Tetrahedral             | 4 | Metal Halide Only | Bromine |         |
| 119 | EFIGAD   | 130 | Dimer Through Anion     | Tetrahedral             | 4 | Metal Halide Only | Bromine |         |
| 120 | EFIGEH   | 131 | Tetramer Through Ligand | Seesaw                  | 4 | Non-Chelate       | N-Donor |         |
|     |          | 132 | Dimer Through Anion     | D-Tetrahedral (Pyramid) | 4 | Non-Chelate       | N-Donor |         |
| 121 | ELEWIC   | 133 | Polymer Through Ligand  | Seesaw                  | 4 | Non-Chelate       | N-Donor |         |
|     |          | 134 | Dimer Through Anion     | Seesaw                  | 4 | Non-Chelate       | N-Donor |         |
| 122 | ELEXIE   | 135 | Discrete Molecule       | Seesaw                  | 4 | Non-Chelate       | S-Donor |         |
| 123 | ELOYEJ   | 136 | Trimer Through Anion    | Seesaw                  | 4 | Non-Chelate       | S-Donor |         |
| 124 | ELUQUZ   | 137 | Polymer Through Ligand  | Square Planar           | 4 | Non-Chelate       | N-Donor |         |
|     |          | 138 | Polymer Through Ligand  | Seesaw                  | 4 | Non-Chelate       | N-Donor |         |
| 125 | EMIFUD   | 139 | Dimer Through Ligand    | Seesaw                  | 4 | Non-Chelate       | N-Donor | O-Donor |
| 126 | EMINUL   | 140 | Discrete Molecule       | T-Shape                 | 3 | Non-Chelate       | N-Donor |         |
| 127 | EQUXEU   | 141 | Dimer Through Ligand    | Seesaw                  | 4 | Non-Chelate       | N-Donor |         |
| 128 | EWIPEG   | 142 | Polymer Through Ligand  | Seesaw                  | 4 | Non-Chelate       | N-Donor |         |
| 129 | EWORAJ   | 143 | Polymer Through Ligand  | Seesaw                  | 4 | Non-Chelate       | N-Donor |         |



|     |            |     |                        |                         |   |                   |             |           |         |
|-----|------------|-----|------------------------|-------------------------|---|-------------------|-------------|-----------|---------|
| 130 | EWOROX     | 144 | Polymer Through Anion  | D-Octahedral            | 6 | Non-Chelate       |             | N-Donor   |         |
| 131 | EXERII     | 145 | Discrete Molecule      | D-Square Pyramid        | 5 | Chelate           |             | P-Donor   | O-Donor |
| 132 | EYAFOA     | 146 | Dimer Through Anion    | D-Tetrahedral (Pyramid) | 4 | Non-Chelate       |             | C-Donor   |         |
| 133 | EYUWUR     | 147 | Discrete Molecule      | Tetrahedral             | 4 | Metal Halide Only |             | Bromine   |         |
| 134 | FAXGOC     | 148 | Polymer Through Ligand | Seesaw                  | 4 | Non-Chelate       |             | N-Donor   |         |
| 135 | FAXHOD     | 149 | Dimer Through Ligand   | Seesaw                  | 4 | Non-Chelate       |             | N-Donor   |         |
| 136 | FAYKAS     | 150 | Discrete Molecule      | Seesaw                  | 4 | Chelate           |             | O-Donor   |         |
| 137 | FEHXOH     | 151 | Discrete Molecule      | Seesaw                  | 4 | Chelate           |             | N-Donor   |         |
| 138 | FELMOA     | 152 | Dimer Through Ligand   | Seesaw                  | 4 | Chelate           |             | N-Donor   |         |
|     |            | 153 | Polymer Through Ligand | D-Square Pyramid        | 5 | Chelate           |             | N-Donor   |         |
| 139 | FIJPEU     | 154 | Polymer Through Ligand | Seesaw                  | 4 | Non-Chelate       |             | N-Donor   |         |
| 140 | FIJQOF     | 155 | Polymer Through Anion  | D-Tetrahedral (Pyramid) | 4 | Metal Halide Only |             | Bromine   |         |
|     |            | 156 | Polymer Through Anion  | Seesaw                  | 4 | Chelate           |             | S-Donor   |         |
| 141 | FIPWOR     | 157 | Dimer Through Anion    | Tetrahedral             | 4 | Metal Halide Only |             | Bromine   |         |
|     |            | 158 | Discrete Molecule      | D-Tetrahedral (Pyramid) | 4 | Chelate           |             | N-Donor   | S-Donor |
| 142 | FIPXIM     | 159 | Dimer Through Ligand   | Seesaw                  | 4 | Chelate           |             | N-Donor   | S-Donor |
| 143 | FOTMOS     | 160 | Discrete Molecule      | Seesaw                  | 4 | Chelate           |             | N-Donor   |         |
| 144 | FOWKOS     | 161 | Discrete Molecule      | Tetrahedral             | 4 | Metal Halide Only |             | Bromine   |         |
| 145 | FULBUJ     | 162 | Dimer Through Anion    | D-Tetrahedral (Pyramid) | 4 | Non-Chelate       |             | S-Donor   |         |
| 146 | FUNKEF     | 163 | Discrete Molecule      | T-Shape                 | 7 | Chelate           | M-M         | O-Donor   | Nickel  |
| 147 | FUNKIJ     | 164 | Discrete Molecule      | T-Shape                 | 6 | Chelate           |             | O-Donor   |         |
| 148 | GAKDIF     | 165 | Discrete Molecule      | Seesaw                  | 4 | Non-Chelate       |             | N-Donor   |         |
| 149 | GANPAO     | 166 | Dimer Through Anion    | Tetrahedral             | 4 | Metal Halide Only |             | Bromine   |         |
| 150 | GASEESAWUO | 167 | Discrete Molecule      | Seesaw                  | 4 | Non-Chelate       |             | S-Donor   |         |
| 151 | GAZTUW01   | 168 | Dimer Through Anion    | Tetrahedral             | 4 | Metal Halide Only |             | Bromine   |         |
|     |            | 169 | Discrete Molecule      | Linear                  | 2 | Metal Halide Only |             | Bromine   |         |
| 152 | GEMPUK     | 170 | Discrete Molecule      | Tetrahedral             | 4 | Metal Halide Only |             | Bromine   |         |
| 153 | GEMPUK01   | 171 | Discrete Molecule      | Tetrahedral             | 4 | Metal Halide Only |             | Bromine   |         |
| 154 | GIRPUU     | 172 | Polymer Through Ligand | T-Shape                 | 3 | Non-Chelate       |             | S-Donor   |         |
|     |            | 173 | Polymer Through Anion  | Seesaw                  | 4 | Non-Chelate       |             | N-Donor   |         |
| 155 | GIWZER     | 174 | Discrete Molecule      | Seesaw                  | 4 | Chelate           |             | N-Donor   |         |
| 156 | GIYLUV     | 175 | Polymer Through Ligand | Seesaw                  | 4 | Non-Chelate       |             | N-Donor   |         |
| 157 | GODJOY     | 176 | Polymer Through Ligand | D-Octahedral            | 6 | Non-Chelate       |             | N-Donor   |         |
| 158 | GOWQIU     | 177 | Polymer Through Ligand | Seesaw                  | 4 | Non-Chelate       |             | N-Donor   |         |
| 159 | GOWWUK     | 178 | Polymer Through M-M    | Seesaw                  | 4 | Metal Halide Only |             | Bromine   |         |
| 160 | GOWXAR     | 179 | Discrete Molecule      | Tetrahedral             | 4 | Metal Halide Only |             | Bromine   |         |
| 161 | GUDZIP     | 180 | Trimer Through Anion   | Square Planar           | 4 | Metal Halide Only |             | Bromine   |         |
|     |            | 181 | Trimer Through Anion   | Seesaw                  | 4 | Non-Chelate       |             | Tellurium |         |
| 162 | GURKUA     | 182 | Discrete Molecule      | Square Planar           | 4 | Non-Chelate       |             | N-Donor   |         |
| 163 | GUTLIR     | 183 | Discrete Molecule      | D-Octahedral            | 6 | Chelate           |             | N-Donor   | S-Donor |
| 164 | HATREB     | 184 | Dimer Through Anion    | Tetrahedral             | 4 | Metal Halide Only |             | Bromine   |         |
| 165 | HATRIF     | 185 | Polymer Through Anion  | Trigonal Bipyramid      | 5 | Metal Halide Only |             | Bromine   |         |
| 166 | HAYPEE     | 186 | Dimer Through Anion    | Tetrahedral             | 4 | Metal Halide Only |             | Bromine   |         |
| 167 | HAZSOQ     | 187 | Polymer Through Ligand | Seesaw                  | 4 | Non-Chelate       |             | N-Donor   |         |
| 168 | HGBDOX     | 188 | Polymer Through Ligand | D-Octahedral            | 6 | Non-Chelate       |             | O-Donor   |         |
| 169 | HIZPIQ     | 189 | Polymer Through Ligand | Seesaw                  | 4 | Non-Chelate       |             | N-Donor   | P-Donor |
| 170 | HIZQAJ     | 190 | Dimer Through Ligand   | D-Tetrahedral (Pyramid) | 4 | Non-Chelate       |             | P-Donor   |         |
| 171 | HOCMER     | 191 | Discrete Molecule      | D-Tetrahedral (Pyramid) | 4 | Chelate           |             | S-Donor   | N-Donor |
| 172 | HOSQAJ     | 192 | Discrete Molecule      | T-Shape                 | 5 | Chelate           |             | N-Donor   | O-Donor |
| 173 | HOTBUP     | 193 | Polymer Through Ligand | D-Octahedral            | 6 | Non-Chelate       |             | N-Donor   |         |
|     |            | 194 | Polymer Through Anion  | D-Tetrahedral (Pyramid) | 4 | Non-Chelate       |             | N-Donor   |         |
| 174 | HOTCAW     | 195 | Polymer Through Anion  | D-Octahedral            | 6 | Non-Chelate       |             | N-Donor   |         |
| 175 | HOXBAX     | 196 | Oligomer Through Anion | Seesaw                  | 4 | M-M               | Non-Chelate | Iron      |         |
|     |            | 197 | Oligomer Through Anion | Seesaw                  | 4 | Non-Chelate       |             | P-Donor   |         |
| 176 | HOXBOL     | 198 | Oligomer Through Anion | Seesaw                  | 4 | M-M               | Non-Chelate | Iron      |         |
|     |            | 199 | Oligomer Through Anion | Seesaw                  | 4 | Non-Chelate       |             | P-Donor   |         |
| 177 | HOXBUR     | 200 | Oligomer Through Anion | Seesaw                  | 4 | M-M               | Non-Chelate | Iron      |         |
|     |            | 201 | Oligomer Through Anion | Seesaw                  | 4 | Non-Chelate       |             | P-Donor   |         |
| 178 | HOXCAY     | 202 | Oligomer Through Anion | Seesaw                  | 4 | M-M               | Non-Chelate | Iron      |         |
|     |            | 203 | Oligomer Through Anion | Seesaw                  | 4 | Non-Chelate       |             | P-Donor   |         |
| 179 | HOYBAY     | 204 | Dimer Through Anion    | D-Tetrahedral (Pyramid) | 4 | Non-Chelate       |             | N-Donor   |         |
| 180 | HOYLIS     | 205 | Polymer Through Anion  | Square Pyramid          | 5 | Non-Chelate       |             | N-Donor   |         |

|     |          |     |                         |                         |   |                   |           |         |
|-----|----------|-----|-------------------------|-------------------------|---|-------------------|-----------|---------|
| 181 | HOYLOY   | 206 | Polymer Through Anion   | D-Tetrahedral (Pyramid) | 4 | Non-Chelate       | N-Donor   |         |
| 182 | HOYLUE   | 207 | Discrete Molecule       | Seesaw                  | 4 | Non-Chelate       | N-Donor   |         |
| 183 | HOYMAL   | 208 | Polymer Through Anion   | Square Pyramid          | 5 | Non-Chelate       | N-Donor   |         |
| 184 | HUGBRA10 | 209 | Discrete Molecule       | Pentagonal Pyramid      | 6 | Chelate           | N-Donor   |         |
|     |          | 210 | Dimer Through Anion     | Tetrahedral             | 4 | Metal Halide Only | Bromine   |         |
| 185 | HUKSUD   | 211 | Discrete Molecule       | D-Tetrahedral (Pyramid) | 4 | Non-Chelate       | P-Donor   |         |
| 186 | HULVOA   | 212 | Dimer Through Anion     | Tetrahedral             | 4 | Metal Halide Only | Bromine   |         |
| 187 | HUPKIO   | 213 | Dimer Through Anion     | D-Trigonal Bipyramid    | 5 | Non-Chelate       | N-donor   |         |
|     |          | 214 | Discrete Molecule       | Tetrahedral             | 4 | Metal Halide Only | Bromine   |         |
| 188 | ICUWOS   | 215 | Dimer Through Anion     | Seesaw                  | 4 | Non-Chelate       | O-Donor   |         |
| 189 | IDOWEE   | 216 | Dimer Through Anion     | D-Tetrahedral (Pyramid) | 4 | Non-Chelate       | S-Donor   |         |
| 190 | IFAWUH   | 217 | Discrete Molecule       | T-Shape                 | 5 | Chelate           | N-Donor   | S-Donor |
| 191 | IGEFOP   | 218 | Polymer Through Anion   | D-Tetrahedral (Pyramid) | 4 | Non-Chelate       | N-Donor   |         |
| 192 | IGEMUD   | 219 | Dimer Through Ligand    | Seesaw                  | 4 | Non-Chelate       | N-donor   |         |
| 193 | IHANIP   | 220 | Polymer Through Ligand  | Seesaw                  | 4 | Non-Chelate       | N-Donor   |         |
| 194 | IJUBEU   | 221 | Discrete Molecule       | Seesaw                  | 4 | Non-Chelate       | S-Donor   |         |
| 195 | IKAHIN   | 222 | Discrete Molecule       | D-Octahedral            | 6 | Chelate           | N-Donor   |         |
| 196 | IKUVUH   | 223 | Tetramer Through Anion  | Seesaw                  | 4 | Non-Chelate       | S-Donor   | N-Donor |
| 197 | INIWOR   | 224 | Discrete Molecule       | Tetrahedral             | 4 | Metal Halide Only | Bromine   |         |
| 198 | INOHOJ   | 225 | Polymer Through Ligand  | Seesaw                  | 4 | Non-Chelate       | N-Donor   |         |
| 199 | INOHUP   | 226 | Dimer Through Ligand    | Seesaw                  | 4 | Non-Chelate       | N-Donor   | O-Donor |
| 200 | IPILOJ   | 227 | Polymer Through Anion   | Seesaw                  | 4 | Non-Chelate       | N-Donor   |         |
|     |          | 228 | Polymer Through Anion   | T-Shape                 | 5 | Non-Chelate       | N-Donor   |         |
|     |          | 229 | Polymer Through Anion   | D-Octahedral            | 6 | Metal Halide Only | Bromine   |         |
| 201 | IQJIAU   | 230 | Discrete Molecule       | Seesaw                  | 4 | Non-Chelate       | N-Donor   |         |
| 202 | IREXAF   | 231 | Discrete Molecule       | Tetrahedral             | 4 | Metal Halide Only | Bromine   |         |
| 203 | IREXEJ   | 232 | Discrete Molecule       | Tetrahedral             | 4 | Metal Halide Only | Bromine   |         |
| 204 | IRUTUK   | 233 | Discrete Molecule       | Seesaw                  | 4 | Non-Chelate       | Chlorine  |         |
| 205 | IRUVAS   | 234 | Dimer Through Anion     | Tetrahedral             | 4 | Metal Halide Only | Bromine   |         |
|     |          | 235 | Discrete Molecule       | Tetrahedral             | 4 | Metal Halide Only | Bromine   |         |
| 206 | IRUVEW   | 236 | Polymer Through Anion   | Tetrahedral             | 4 | Metal Halide Only | Bromine   |         |
| 207 | ISATUS   | 237 | Polymer Through Ligand  | Seesaw                  | 4 | Non-Chelate       | N-Donor   |         |
| 208 | IXIQOV   | 238 | Polymer Through Ligand  | Seesaw                  | 4 | Non-Chelate       | N-Donor   |         |
| 209 | JAGLUZ   | 239 | Discrete Molecule       | T-Shape                 | 5 | Non-Chelate       | S-Donor   | N-Donor |
| 210 | JAPJEQ   | 240 | Polymer Through Ligand  | Seesaw                  | 4 | Non-Chelate       | N-Donor   |         |
| 211 | JAPKAN   | 241 | Dimer Through Ligand    | Seesaw                  | 4 | Non-Chelate       | N-Donor   |         |
| 212 | JAPKER   | 242 | Trimer Through Ligand   | Seesaw                  | 4 | Non-Chelate       | N-Donor   | O-Donor |
|     |          | 243 | Trimer Through Ligand   | Square Planar           | 4 | Non-Chelate       | N-Donor   | O-Donor |
| 213 | JAVJOG   | 244 | Discrete Molecule       | Seesaw                  | 4 | Non-Chelate       | S-Donor   |         |
| 214 | JECXUK   | 245 | Dimer Through Ligand    | T-Shape                 | 5 | Chelate           | S-Donor   |         |
| 215 | JEQMOI   | 246 | Discrete Molecule       | Tetrahedral             | 4 | Metal Halide Only | Bromine   |         |
| 216 | JISFUN01 | 247 | Discrete Molecule       | Tetrahedral             | 4 | Metal Halide Only | Bromine   |         |
| 217 | JIZXUN   | 248 | Dimer Through Anion     | Seesaw                  | 4 | Metal Halide Only | Bromine   |         |
|     |          | 249 | Tetramer Through Anion  | D-Tetrahedral (Pyramid) | 4 | Metal Halide Only | Bromine   |         |
|     |          | 250 | Tetramer Through Anion  | Pentagonal Bipyramid    | 7 | Non-Chelate       | O-Donor   | N-Donor |
| 218 | JOBBOT   | 251 | Discrete Molecule       | Seesaw                  | 4 | Chelate           | S-Donor   |         |
| 219 | JOWVEW   | 252 | Polymer Through Anion   | D-Square Pyramid        | 5 | Non-Chelate       | O-Donor   |         |
| 220 | JUDJUN   | 253 | Discrete Molecule       | Seesaw                  | 4 | Chelate           | S-Donor   |         |
| 221 | KADQOX   | 254 | Discrete Molecule       | Seesaw                  | 4 | Non-Chelate       | P-Donor   |         |
| 222 | KATHAQ   | 255 | Tetramer Through Ligand | Seesaw                  | 4 | Non-Chelate       | N-Donor   |         |
| 223 | KEKFUD   | 256 | Discrete Molecule       | Seesaw                  | 4 | Chelate           | N-Donor   |         |
| 224 | KEWWUE   | 257 | Dimer Through Anion     | Tetrahedral             | 4 | Metal Halide Only | Bromine   |         |
| 225 | KEYZOE   | 258 | Dimer Through Anion     | Tetrahedral             | 4 | Metal Halide Only | Bromine   |         |
| 226 | KIBRUJ   | 259 | Polymer Through Ligand  | Seesaw                  | 4 | Non-Chelate       | N-Donor   |         |
| 227 | KIJKOD   | 260 | Dimer Through Ligand    | D-Tetrahedral (Pyramid) | 4 | Non-Chelate       | Tellurium |         |
| 228 | KUCWEM   | 261 | Polymer Through Ligand  | D-Octahedral            | 6 | Chelate           | N-Donor   |         |
|     |          | 262 | Polymer Through Ligand  | Tetrahedral             | 4 | Metal Halide Only | Bromine   |         |
| 229 | KUCWIQ   | 263 | Discrete Molecule       | Seesaw                  | 4 | Non-Chelate       | N-Donor   |         |
| 230 | KUCXAJ   | 264 | Polymer Through Anion   | Seesaw                  | 4 | Metal Halide Only | Bromine   |         |
|     |          | 265 | Polymer Through Ligand  | T-Shape                 | 6 | Chelate           | N-Donor   |         |
| 231 | KUDNUT   | 266 | Discrete Molecule       | Square Pyramid          | 5 | Chelate           | C-Donor   | O-Donor |
|     |          | 267 | Discrete Molecule       | Tetrahedral             | 4 | Metal Halide Only | Bromine   |         |

|     |          |     |                        |                         |   |                   |         |         |         |
|-----|----------|-----|------------------------|-------------------------|---|-------------------|---------|---------|---------|
| 232 | KUDPAB   | 268 | Polymer Through Ligand | Square Pyramid          | 5 | Chelate           | C-Donor | O-Donor |         |
|     |          | 269 | Polymer Through Anion  | Tetrahedral             | 4 | Metal Halide Only | Bromine |         |         |
| 233 | KUGPAD   | 270 | Dimer Through Ligand   | Seesaw                  | 4 | Chelate           | S-Donor |         |         |
| 234 | KUJWAP   | 271 | Discrete Molecule      | T-Shape                 | 6 | Chelate           | S-Donor |         |         |
| 235 | KUJWUJ   | 272 | Polymer Through Ligand | D-Trigonal Bipyramid    | 5 | Chelate           | N-Donor |         |         |
|     |          | 273 | Polymer Through Anion  | D-Trigonal Bipyramid    | 5 | Chelate           | N-Donor |         |         |
| 236 | KUNNAK   | 274 | Polymer Through Ligand | Seesaw                  | 4 | Non-Chelate       | N-Donor |         |         |
| 237 | KUNNAK01 | 275 | Polymer Through Ligand | Seesaw                  | 4 | Non-Chelate       | N-Donor |         |         |
| 238 | KUNYIC   | 276 | Discrete Molecule      | T-Shape                 | 3 | Chelate           | C-Donor |         |         |
|     |          | 277 | Discrete Molecule      | Tetrahedral             | 4 | Metal Halide Only | Bromine |         |         |
|     |          | 278 | Discrete Molecule      | Seesaw                  | 4 | Chelate           | C-Donor |         |         |
| 239 | KUNYOI   | 279 | Discrete Molecule      | T-Shape                 | 3 | Chelate           | C-Donor |         |         |
|     |          | 280 | Discrete Molecule      | Tetrahedral             | 4 | Metal Halide Only | Bromine |         |         |
|     |          | 281 | Discrete Molecule      | Seesaw                  | 4 | Chelate           | C-Donor |         |         |
| 240 | LACTIU   | 282 | Polymer Through Anion  | D-Tetrahedral (Pyramid) | 4 | Non-Chelate       | N-Donor |         |         |
| 241 | LADJOR   | 283 | Discrete Molecule      | Seesaw                  | 4 | Chelate           | C-Donor | P-Donor |         |
| 242 | LAQGEP   | 284 | Discrete Molecule      | Seesaw                  | 4 | Non-Chelate       | S-Donor |         |         |
| 243 | LARLEX   | 285 | Polymer Through Ligand | Seesaw                  | 4 | Non-Chelate       | N-Donor |         |         |
| 244 | LAZMAC   | 286 | Polymer Through Ligand | Seesaw                  | 4 | Non-Chelate       | N-Donor |         |         |
| 245 | LAZTAH   | 287 | Dimer Through Anion    | Tetrahedral             | 4 | Metal Halide Only | Bromine |         |         |
| 246 | LECROC   | 288 | Discrete Molecule      | Seesaw                  | 4 | Chelate           | N-Donor |         |         |
| 247 | LECRUI   | 289 | Discrete Molecule      | Seesaw                  | 4 | Chelate           | N-Donor |         |         |
| 248 | LECSAP   | 290 | Discrete Molecule      | Seesaw                  | 4 | Chelate           | N-Donor |         |         |
| 249 | LECSAP01 | 291 | Discrete Molecule      | Seesaw                  | 4 | Chelate           | N-Donor |         |         |
| 250 | LEHSAU   | 292 | Discrete Molecule      | Seesaw                  | 4 | Chelate           | N-Donor |         |         |
| 251 | LEJQOH   | 293 | Polymer Through Ligand | Seesaw                  | 4 | Non-Chelate       | N-Donor |         |         |
| 252 | LEKRUQ   | 294 | Dimer Through Anion    | D-Square Pyramid        | 5 | Chelate           | N-Donor |         |         |
| 253 | LEKTAY   | 295 | Discrete Molecule      | Seesaw                  | 4 | Chelate           | N-Donor |         |         |
| 254 | LELYAC   | 296 | Oligomer Through Anion | Tetrahedral             | 4 | Metal Halide Only | Bromine |         |         |
| 255 | LEQRUV   | 297 | Polymer Through Anion  | D-Square Pyramid        | 5 | Chelate           | N-Donor |         |         |
|     |          | 298 | Polymer Through Anion  | Square Planar           | 4 | Metal Halide Only | Bromine |         |         |
|     |          | 299 | Polymer Through Anion  | T-Shape                 | 3 | Metal Halide Only | Bromine |         |         |
|     |          | 300 | Polymer Through Anion  | Trigonal Pyramid        | 3 | Chelate           | N-Donor |         |         |
| 256 | LEXBWE   | 301 | Dimer Through Anion    | D-Tetrahedral (Pyramid) | 4 | Non-Chelate       | C-Donor |         |         |
| 257 | LEZDUP   | 302 | Dimer Through Ligand   | T-Shape                 | 6 | Chelate           | O-Donor | N-Donor |         |
| 258 | LIFKUG   | 303 | Dimer Through Anion    | D-Tetrahedral (Pyramid) | 4 | Non-Chelate       | S-Donor |         |         |
| 259 | LIGRID   | 304 | Dimer Through Anion    | D-Tetrahedral (Pyramid) | 4 | Non-Chelate       | C-Donor |         |         |
| 260 | LINYAK   | 305 | Polymer Through Ligand | Seesaw                  | 4 | Non-Chelate       | N-Donor |         |         |
| 261 | LOBYUX   | 306 | Dimer Through Anion    | Tetrahedral             | 4 | Metal Halide Only | Bromine |         |         |
| 262 | LOLFIC   | 307 | Polymer Through Anion  | D-Trigonal Bipyramid    | 5 | Chelate           | S-Donor | N-Donor |         |
|     |          | 308 | Polymer Through Anion  | Tetrahedral             | 4 | Metal Halide Only | Bromine |         |         |
| 263 | LOLFUO   | 309 | Polymer Through Ligand | Seesaw                  | 4 | Chelate           | S-Donor | N-Donor |         |
|     |          | 310 | Polymer Through Anion  | D-Tetrahedral (Pyramid) | 4 | Chelate           | S-Donor |         |         |
| 264 | LURVOJ   | 311 | Dimer Through Anion    | Tetrahedral             | 4 | Metal Halide Only | Bromine |         |         |
| 265 | LUVKET   | 312 | Polymer Through Anion  | Square Pyramid          | 5 | Non-Chelate       | N-Donor |         |         |
| 266 | LUVKET01 | 313 | Polymer Through Anion  | Square Pyramid          | 5 | Non-Chelate       | N-Donor |         |         |
| 267 | MAJGUB   | 314 | Polymer Through Ligand | T-Shape                 | 5 | Chelate           | N-Donor | O-Donor |         |
| 268 | MAJHAI   | 315 | Dimer Through Anion    | T-Shape                 | 3 | Metal Halide Only | Bromine |         |         |
| 269 | MARREC   | 316 | Dimer Through Ligand   | Seesaw                  | 4 | Non-Chelate       | S-Donor |         |         |
| 270 | MARVAE   | 317 | Dimer Through Ligand   | Seesaw                  | 4 | Non-Chelate       | N-Donor |         |         |
| 271 | MATBHG   | 318 | Discrete Molecule      | Tetrahedral             | 4 | Metal Halide Only | Bromine |         |         |
| 272 | MAWFOF   | 319 | Dimer Through Anion    | D-Tetrahedral (Pyramid) | 4 | Non-Chelate       | Arsenic |         |         |
| 273 | MECLIQ   | 320 | Dimer Through Anion    | D-Tetrahedral (Pyramid) | 4 | Non-Chelate       | P-Donor |         |         |
| 274 | MECLOW   | 321 | Dimer Through Ligand   | Trigonal Pyramid        | 3 | Non-Chelate       | P-Donor | O-Donor |         |
| 275 | MEVBAQ   | 322 | Discrete Molecule      | Seesaw                  | 4 | Non-Chelate       | S-Donor |         |         |
| 276 | MICCAC   | 323 | Discrete Molecule      | Square Pyramid          | 5 | Chelate           | M-M     | P-Donor | Mercury |
| 277 | MIDZIJ   | 324 | Polymer Through Ligand | Seesaw                  | 4 | Non-Chelate       | N-Donor |         |         |
| 278 | MIGBUA   | 325 | Discrete Molecule      | Tetrahedral             | 4 | Metal Halide Only | Bromine |         |         |
| 279 | MIHBAH   | 326 | Discrete Molecule      | Tetrahedral             | 4 | Metal Halide Only | Bromine |         |         |
| 280 | MIHBEL   | 327 | Discrete Molecule      | Tetrahedral             | 4 | Metal Halide Only | Bromine |         |         |
| 281 | MILTOQ   | 328 | Discrete Molecule      | Seesaw                  | 4 | Chelate           | S-Donor |         |         |
| 282 | MIRPUZ   | 329 | Discrete Molecule      | Seesaw                  | 4 | Non-Chelate       | N-Donor |         |         |

|     |        |     |                        |                         |   |                   |             |          |           |      |
|-----|--------|-----|------------------------|-------------------------|---|-------------------|-------------|----------|-----------|------|
| 283 | MOJFOI | 330 | Dimer Through Anion    | Seesaw                  | 4 | Chelate           |             | C-Donor  |           |      |
|     |        | 331 | Dimer Through Anion    | Tetrahedral             | 4 | Metal Halide Only |             | Bromine  |           |      |
| 284 | MOJFUO | 332 | Dimer Through Anion    | Seesaw                  | 4 | Chelate           |             | C-Donor  |           |      |
|     |        | 333 | Dimer Through Anion    | Tetrahedral             | 4 | Metal Halide Only |             | Bromine  |           |      |
| 285 | MOLVUE | 334 | Polymer Through Anion  | Seesaw                  | 4 | Metal Halide Only |             | Bromine  |           |      |
|     |        | 335 | Polymer Through Anion  | Tetrahedral             | 4 | Metal Halide Only |             | Bromine  |           |      |
| 286 | MOWFUA | 336 | Discrete Molecule      | T-Shape                 | 3 | Non-Chelate       |             | N-Donor  |           |      |
| 287 | MOWGEL | 337 | Polymer Through Anion  | D-Octahedral            | 6 | Non-Chelate       |             | N-Donor  |           |      |
| 288 | MTBRHG | 338 | Polymer Through Anion  | Square Pyramid          | 5 | Non-Chelate       |             | S-Donor  |           |      |
| 289 | NAQYOT | 339 | Polymer Through Anion  | Trigonal Bipyramid      | 5 | Metal Halide Only |             | Bromine  |           |      |
| 290 | NAXWAL | 340 | Polymer Through Anion  | D-Tetrahedral (Pyramid) | 4 | Non-Chelate       |             | S-Donor  |           |      |
|     |        | 341 | Polymer Through Ligand | D-Tetrahedral (Pyramid) | 4 | Non-Chelate       |             | S-Donor  |           |      |
| 291 | NAZLUX | 342 | Dimer Through Anion    | Seesaw                  | 4 | Non-Chelate       |             | N-Donor  |           |      |
| 292 | NEBCII | 343 | Discrete Molecule      | D-Trigonal Bipyramid    | 5 | Chelate           |             | N-Donor  | S-Donor   |      |
|     |        | 344 | Discrete Molecule      | Tetrahedral             | 4 | Metal Halide Only |             | Bromine  |           |      |
| 293 | NEBYUO | 345 | Discrete Molecule      | T-Shape                 | 3 | Metal Halide Only |             | Bromine  |           |      |
|     |        | 346 | Discrete Molecule      | Linear                  | 2 | Chelate           | M-M         | C-Donor  | Palladium |      |
| 294 | NEKJES | 347 | Dimer Through Anion    | Seesaw                  | 4 | Chelate           |             | C-Donor  |           |      |
|     |        | 348 | Dimer Through Ligand   | Tetrahedral             | 4 | Metal Halide Only |             | Bromine  |           |      |
| 295 | NEKWIJ | 349 | Discrete Molecule      | Seesaw                  | 4 | Chelate           |             | N-Donor  |           |      |
| 296 | NEPFIY | 350 | Polymer Through Ligand | D-Square Pyramid        | 5 | Chelate           |             | N-Donor  |           |      |
| 297 | NETGUP | 351 | Polymer Through Ligand | Seesaw                  | 4 | Non-Chelate       |             | N-Donor  |           |      |
| 298 | NEWROY | 352 | Polymer Through Ligand | Square Pyramid          | 5 | Non-Chelate       |             | O-Donor  | N-Donor   |      |
|     |        | 353 | Polymer Through Anion  | Square Pyramid          | 5 | Non-Chelate       |             | O-Donor  | N-Donor   |      |
| 299 | NIFBAH | 354 | Discrete Molecule      | D-Tetrahedral (Pyramid) | 4 | Metal Halide Only |             | S-Donor  |           |      |
| 300 | NIMBAO | 355 | Polymer Through Anion  | D-Tetrahedral (Pyramid) | 4 | Non-Chelate       |             | S-Donor  |           |      |
| 301 | NINFEW | 356 | Discrete Molecule      | Seesaw                  | 4 | Non-Chelate       |             | N-Donor  |           |      |
| 302 | NIPNIK | 357 | Polymer Through Ligand | Seesaw                  | 4 | Non-Chelate       |             | O-Donor  |           |      |
| 303 | NIVBAV | 358 | Discrete Molecule      | D-Pentagonal Bipyramid  | 7 | Chelate           | M-M         | C-Donor  | N-Donor   | Iron |
| 304 | NIYCUT | 359 | Oligomer Through Anion | Tetrahedral             | 4 | Metal Halide Only |             | Bromine  |           |      |
| 305 | NIYDAA | 360 | Oligomer Through Anion | Tetrahedral             | 4 | Metal Halide Only |             | Bromine  |           |      |
| 306 | NOHZOA | 361 | Dimer Through Ligand   | Tetrahedral             | 4 | Non-Chelate       |             | N-Donor  |           |      |
| 307 | NOQVOE | 362 | Discrete Molecule      | Tetrahedral             | 4 | Non-Chelate       |             | S-Donor  |           |      |
| 308 | NUXWIN | 363 | Dimer Through Ligand   | Seesaw                  | 4 | Non-Chelate       |             | S-Donor  |           |      |
| 309 | OBOGOD | 364 | Discrete Molecule      | Seesaw                  | 4 | Non-Chelate       |             | N-Donor  |           |      |
| 310 | ODESUM | 365 | Oligomer Through Anion | Tetrahedral             | 4 | Metal Halide Only |             | Bromine  |           |      |
| 311 | ODETAT | 366 | Discrete Molecule      | Seesaw                  | 4 | Non-Chelate       |             | S-Donor  | N-Donor   |      |
|     |        | 367 | Discrete Molecule      | D-Tetrahedral (Pyramid) | 4 | Non-Chelate       |             | S-Donor  | N-Donor   |      |
| 312 | ODINUL | 368 | Dimer Through Anion    | D-Tetrahedral (Pyramid) | 4 | Non-Chelate       |             | C-Donor  |           |      |
| 313 | ODISIE | 369 | Polymer Through Ligand | Seesaw                  | 4 | Non-Chelate       |             | N-Donor  |           |      |
| 314 | ODITEB | 370 | Polymer Through Anion  | D-Trigonal Bipyramid    | 5 | Chelate           |             | N-Donor  |           |      |
|     |        | 371 | Polymer Through Anion  | D-Tetrahedral (Pyramid) | 4 | Chelate           |             | N-Donor  |           |      |
| 315 | OFORIM | 372 | Polymer Through Ligand | Tetrahedral             | 4 | Chelate           |             | Se-Donor |           |      |
|     |        | 373 | Polymer Through Ligand | Seesaw                  | 4 | Chelate           |             | Se-Donor |           |      |
|     |        | 374 | Polymer Through Ligand | Seesaw                  | 4 | Chelate           |             | N-Donor  | Se-Donor  |      |
| 316 | OMEMOI | 375 | Discrete Molecule      | Trigonal Pyramid        | 4 | Chelate           |             | N-Donor  | Tellurium |      |
| 317 | OMENAV | 376 | Discrete Molecule      | Trigonal Pyramid        | 4 | Chelate           |             | N-Donor  | Tellurium |      |
| 318 | OMILED | 377 | Discrete Molecule      | Tetrahedral             | 4 | Metal Halide Only |             | Bromine  |           |      |
| 319 | ONEYUD | 378 | Discrete Molecule      | Seesaw                  | 4 | Non-Chelate       |             | N-Donor  |           |      |
| 320 | ONEZAK | 379 | Discrete Molecule      | Seesaw                  | 4 | Non-Chelate       |             | N-Donor  |           |      |
| 321 | ONEZIS | 380 | Discrete Molecule      | Seesaw                  | 4 | Non-Chelate       |             | N-Donor  |           |      |
| 322 | OQAJUM | 381 | Discrete Molecule      | T-Shape                 | 5 | Non-Chelate       |             | N-Donor  |           |      |
| 323 | OQIDIC | 382 | Discrete Molecule      | Seesaw                  | 4 | Non-Chelate       |             | N-Donor  |           |      |
| 324 | OROJIP | 383 | Polymer Through Ligand | Seesaw                  | 4 | Non-Chelate       |             | N-Donor  |           |      |
| 325 | PAGWID | 384 | Discrete Molecule      | D-Trigonal Pyramid      | 4 | M-M               | Non-Chelate | Platinum |           |      |
| 326 | PASHGB | 385 | Discrete Molecule      | Seesaw                  | 4 | Non-Chelate       |             | Arsenic  |           |      |
| 327 | PAYCAT | 386 | Discrete Molecule      | T-Shape                 | 3 | Non-Chelate       |             | N-Donor  |           |      |
| 328 | PAYCEX | 387 | Discrete Molecule      | Seesaw                  | 4 | Non-Chelate       |             | N-Donor  | O-Donor   |      |
| 329 | PAYCIB | 388 | Polymer Through Ligand | Seesaw                  | 4 | Non-Chelate       |             | N-Donor  | O-Donor   |      |
| 330 | PAYCOH | 389 | Polymer Through Ligand | Seesaw                  | 4 | Non-Chelate       |             | N-Donor  | O-Donor   |      |
|     |        | 390 | Polymer Through Anion  | Octahedral              | 6 | Metal Halide Only |             | Bromine  |           |      |
| 331 | PEDPIZ | 391 | Polymer Through Ligand | D-Trigonal Bipyramid    | 5 | Chelate           |             | N-Donor  |           |      |
| 332 | PERGOJ | 392 | Dimer Through Anion    | Trigonal Bipyramid      | 5 | Non-Chelate       |             | S-Donor  | P-Donor   |      |

|     |          |     |                        |                         |   |                   |                   |
|-----|----------|-----|------------------------|-------------------------|---|-------------------|-------------------|
| 333 | PEXFEE   | 393 | Discrete Molecule      | Tetrahedral             | 4 | Metal Halide Only | Bromine           |
| 334 | PIGRIH   | 394 | Discrete Molecule      | Seesaw                  | 4 | Metal Halide Only | Bromine           |
| 335 | PIHJIA   | 395 | Polymer Through Ligand | Seesaw                  | 4 | Non-Chelate       | N-Donor           |
| 336 | PIHJOG   | 396 | Polymer Through Ligand | Seesaw                  | 4 | Non-Chelate       | N-Donor           |
| 337 | PIHJUM   | 397 | Polymer Through Anion  | Square Pyramid          | 5 | Non-Chelate       | N-Donor           |
| 338 | PIMCIZ   | 398 | Discrete Molecule      | Seesaw                  | 4 | Non-Chelate       | P-Donor           |
| 339 | PIMCIZ01 | 399 | Discrete Molecule      | Seesaw                  | 4 | Non-Chelate       | P-Donor           |
| 340 | PIQCID   | 400 | Polymer Through Anion  | T-Shape                 | 3 | Non-Chelate       | C-Donor           |
|     |          | 401 | Polymer Through Anion  | Square Planar           | 4 | Non-Chelate       | C-Donor           |
| 341 | PIZLIV   | 402 | Polymer Through Ligand | Seesaw                  | 4 | Non-Chelate       | N-Donor           |
| 342 | PODWOU   | 403 | Tetramer Through Anion | D-Pentagonal Bipyramid  | 7 | Chelate           | O-Donor           |
|     |          | 404 | Tetramer Through Anion | D-Trigonal Bipyramid    | 5 | Chelate           | O-Donor           |
| 343 | POLKEG   | 405 | Discrete Molecule      | Hexagonal Bipyramid     | 8 | Chelate           | O-Donor           |
| 344 | POLLEH   | 406 | Discrete Molecule      | T-Shape                 | 6 | Chelate           | O-Donor           |
| 345 | POMGOO   | 407 | Discrete Molecule      | Seesaw                  | 4 | Chelate           | N-Donor           |
| 346 | POMGOO01 | 408 | Discrete Molecule      | Seesaw                  | 4 | Chelate           | N-Donor           |
| 347 | POPHIL   | 409 | Polymer Through Anion  | Trigonal Bipyramid      | 5 | Metal Halide Only | Bromine           |
| 348 | PORLUE   | 410 | Discrete Molecule      | Seesaw                  | 4 | Chelate           | P-Donor   S-Donor |
| 349 | PURWEF   | 411 | Discrete Molecule      | Seesaw                  | 4 | Chelate           | N-Donor           |
| 350 | QACFIJ   | 412 | Polymer Through Anion  | Tetrahedral             | 4 | Metal Halide Only | Bromine           |
| 351 | QAHWIH   | 413 | Discrete Molecule      | Tetrahedral             | 4 | Chelate           | N-Donor           |
| 352 | QAYTOZ   | 414 | Discrete Molecule      | Tetrahedral             | 4 | Metal Halide Only | Bromine           |
| 353 | QEMDUH   | 415 | Polymer Through Anion  | Tetrahedral             | 4 | Metal Halide Only | Bromine           |
|     |          | 416 | Polymer Through Anion  | Seesaw                  | 4 | Metal Halide Only | Bromine           |
| 354 | QEPXAK   | 417 | Polymer Through Anion  | Trigonal Bipyramid      | 5 | M-M   Non-Chelate | Copper            |
| 355 | QEPXEO   | 418 | Polymer Through Anion  | Tetrahedral             | 4 | M-M   Non-Chelate | Copper            |
| 356 | QEPZAN   | 419 | Polymer Through Ligand | Seesaw                  | 4 | Non-Chelate       | N-Donor           |
| 357 | QEV MAG  | 420 | Dimer Through Anion    | Tetrahedral             | 4 | Metal Halide Only | Bromine           |
| 358 | QEV MIO  | 421 | Dimer Through Anion    | Tetrahedral             | 4 | Metal Halide Only | Bromine           |
| 359 | QEV MUA  | 422 | Dimer Through Anion    | Tetrahedral             | 4 | Metal Halide Only | Bromine           |
| 360 | QEZPES   | 423 | Dimer Through Ligand   | Seesaw                  | 4 | Non-Chelate       | O-Donor   N-Donor |
| 361 | QEZPIW   | 424 | Discrete Molecule      | T-Shape                 | 3 | Non-Chelate       | N-Donor           |
| 362 | QEZPOC   | 425 | Discrete Molecule      | T-Shape                 | 3 | Non-Chelate       | N-Donor           |
| 363 | QEZPUI   | 426 | Discrete Molecule      | T-Shape                 | 3 | Non-Chelate       | N-Donor           |
| 364 | QEZQAP   | 427 | Discrete Molecule      | T-Shape                 | 3 | Non-Chelate       | N-Donor           |
| 365 | QIQHUT   | 428 | Polymer Through Ligand | Seesaw                  | 4 | Non-Chelate       | N-Donor           |
| 366 | QIVWAU   | 429 | Polymer Through Ligand | Seesaw                  | 4 | Non-Chelate       | N-Donor           |
| 367 | QODHEW   | 430 | Polymer Through Ligand | Seesaw                  | 4 | Non-Chelate       | N-Donor           |
| 368 | QODHEW01 | 431 | Polymer Through Ligand | Seesaw                  | 4 | Non-Chelate       | N-Donor           |
| 369 | QOPNAM   | 432 | Polymer Through Anion  | Square Pyramid          | 5 | Metal Halide Only | Bromine           |
| 370 | QOQCOO   | 433 | Polymer Through Anion  | D-Octahedral            | 6 | Non-Chelate       | S-Donor           |
|     |          | 434 | Polymer Through Anion  | T-Shape                 | 5 | Non-Chelate       | S-Donor           |
|     |          | 435 | Polymer Through Anion  | Tetrahedral             | 4 | Metal Halide Only | Bromine           |
| 371 | QOTJAL   | 436 | Discrete Molecule      | Seesaw                  | 4 | Chelate           | N-Donor           |
| 372 | QUMREX   | 437 | Tetramer Through Anion | Trigonal Bipyramid      | 5 | Metal Halide Only | Bromine           |
|     |          | 438 |                        | Seesaw                  | 4 | Chelate           | N-Donor           |
| 373 | QUM SOG  | 439 | Dimer Through Anion    | D-Tetrahedral (Pyramid) | 4 | Non-Chelate       | O-Donor           |
| 374 | QUMTOI   | 440 | Polymer Through Anion  | D-Octahedral            | 6 | Non-Chelate       | N-Donor           |
| 375 | QUMT UO  | 441 | Polymer Through Anion  | Square Pyramid          | 5 | Non-Chelate       | N-Donor           |
| 376 | QUMVEA   | 442 | Polymer Through Anion  | Square Pyramid          | 5 | Non-Chelate       | N-Donor           |
| 377 | QUPBOU   | 443 | Discrete Molecule      | Tetrahedral             | 4 | Metal Halide Only | Bromine           |
| 378 | QUVWAH   | 444 | Polymer Through Anion  | Trigonal Bipyramid      | 5 | Non-Chelate       | N-Donor           |
| 379 | QUVWEL   | 445 | Polymer Through Anion  | Square Pyramid          | 5 | Non-Chelate       | N-Donor           |
| 380 | QUVW OV  | 446 | Polymer Through Anion  | Trigonal Bipyramid      | 5 | Non-Chelate       | N-Donor           |
| 381 | QUVZUE   | 447 | Polymer Through Anion  | Square Pyramid          | 5 | Non-Chelate       | N-Donor           |
| 382 | QUZFAU   | 448 | Polymer Through Anion  | Square Planar           | 4 | Non-Chelate       | N-Donor           |
| 383 | RACQIV   | 449 | Trimer Through Ligand  | Seesaw                  | 4 | Non-Chelate       | Tellurium         |
|     |          | 450 | Dimer Through Anion    | Tetrahedral             | 4 | Metal Halide Only | Bromine           |
| 384 | RADDOS   | 451 | Polymer Through Anion  | D-Square Pyramid        | 5 | Chelate           | N-Donor           |
|     |          | 452 | Polymer Through Ligand | D-Square Pyramid        | 5 | Chelate           | N-Donor           |
| 385 | RAMJEV   | 453 | Polymer Through Ligand | Seesaw                  | 4 | Non-Chelate       | N-Donor           |
| 386 | RASGEY   | 454 | Polymer Through Anion  | Trigonal Bipyramid      | 5 | Non-Chelate       | S-Donor           |

|     |          |     |                        |                         |   |                   |          |         |
|-----|----------|-----|------------------------|-------------------------|---|-------------------|----------|---------|
|     |          | 455 | Polymer Through Anion  | Seesaw                  | 4 | Non-Chelate       | S-Donor  |         |
|     |          | 456 | Polymer Through Anion  | Trigonal Pyramid        | 4 | Non-Chelate       | S-Donor  |         |
| 387 | RAWTAL   | 457 | Polymer Through Ligand | Seesaw                  | 4 | Non-Chelate       | N-Donor  |         |
| 388 | REPFEZ   | 458 | Discrete Molecule      | Seesaw                  | 4 | Non-Chelate       | N-Donor  |         |
| 389 | REZWOJ   | 459 | Polymer Through Ligand | Seesaw                  | 4 | Non-Chelate       | N-Donor  |         |
| 390 | REZWUP   | 460 | Polymer Through Ligand | Seesaw                  | 4 | Non-Chelate       | N-Donor  |         |
| 391 | RIHHAS   | 461 | Polymer Through Ligand | Seesaw                  | 4 | Non-Chelate       | N-Donor  |         |
| 392 | RITMAI   | 462 | Discrete Molecule      | T-Shape                 | 3 | Non-Chelate       | P-Donor  |         |
| 393 | RITYUQ   | 463 | Polymer Through Anion  | Square Pyramid          | 5 | Non-Chelate       | S-Donor  |         |
| 394 | RITZAX   | 464 | Polymer Through Anion  | Square Pyramid          | 5 | Non-Chelate       | S-Donor  |         |
| 395 | RODXEO   | 465 | Polymer Through Ligand | Seesaw                  | 4 | Non-Chelate       | N-Donor  |         |
| 396 | ROMFIK   | 466 | Discrete Molecule      | Seesaw                  | 4 | Non-Chelate       | N-Donor  |         |
| 397 | RORREV   | 467 | Dimer Through Anion    | Tetrahedral             | 4 | Metal Halide Only | Bromine  |         |
| 398 | ROSDOS   | 468 | Discrete Molecule      | Seesaw                  | 4 | Non-Chelate       | S-Donor  | P-Donor |
| 399 | RUKGEJ   | 469 | Discrete Molecule      | Hexagonal Bipyramid     | 8 | Chelate           | O-Donor  |         |
| 400 | RUYWAL   | 470 | Polymer Through Ligand | Seesaw                  | 4 | Non-Chelate       | O-Donor  | N-Donor |
| 401 | RUYWOZ   | 471 | Polymer Through Ligand | Square Pyramid          | 5 | Non-Chelate       | O-Donor  | N-Donor |
| 402 | SAFBUY   | 472 | Discrete Molecule      | Seesaw                  | 4 | Chelate           | N-Donor  |         |
| 403 | SAFCAD   | 473 | Dimer Through Ligand   | Seesaw                  | 4 | Chelate           | N-Donor  | S-Donor |
| 404 | SAJVIJ   | 474 | Discrete Molecule      | Seesaw                  | 4 | Chelate           | N-Donor  |         |
| 405 | SEDPOI   | 475 | Discrete Molecule      | Seesaw                  | 4 | Non-Chelate       | N-Donor  |         |
| 406 | SEGTA    | 476 | Discrete Molecule      | Tetrahedral             | 4 | Metal Halide Only | Bromine  |         |
| 407 | SEMGEY   | 477 | Discrete Molecule      | Tetrahedral             | 4 | Metal Halide Only | Bromine  |         |
| 408 | SIFCAL   | 478 | Discrete Molecule      | Trigonal                | 3 | Metal Halide Only | Bromine  |         |
| 409 | SINHII   | 479 | Polymer Through Ligand | Seesaw                  | 4 | Non-Chelate       | N-Donor  |         |
| 410 | SIRYIC   | 480 | Discrete Molecule      | Seesaw                  | 4 | Chelate           | S-Donor  |         |
| 411 | SOHMEJ   | 481 | Discrete Molecule      | Seesaw                  | 4 | Non-Chelate       | N-Donor  |         |
| 412 | SOPDOQ   | 482 | Polymer Through Anion  | Seesaw                  | 4 | Metal Halide Only | Chlorine |         |
| 413 | SUSWUY   | 483 | Dimer Through Anion    | D-Tetrahedral (Pyramid) | 4 | Non-Chelate       | S-Donor  |         |
| 414 | SUZCOF   | 484 | Dimer Through Anion    | D-Tetrahedral (Pyramid) | 4 | Non-Chelate       | S-Donor  |         |
| 415 | SUZCOF01 | 485 | Dimer Through Anion    | D-Tetrahedral (Pyramid) | 4 | Non-Chelate       | S-Donor  |         |
| 416 | TABYUS   | 486 | Dimer Through Ligand   | T-Shape                 | 3 | Non-Chelate       | N-Donor  |         |
| 417 | TAGKIV   | 487 | Dimer Through Anion    | D-Square Pyramid        | 5 | Non-Chelate       | S-Donor  |         |
| 418 | TENNEH   | 488 | Dimer Through Anion    | D-Tetrahedral (Pyramid) | 4 | Non-Chelate       | C-Donor  |         |
| 419 | TEYFEK   | 489 | Discrete Molecule      | Seesaw                  | 4 | Chelate           | N-Donor  |         |
| 420 | THFHGB   | 490 | Polymer Through Anion  | Square Pyramid          | 5 | Non-Chelate       | O-Donor  |         |
| 421 | THLHGA   | 491 | Polymer Through Anion  | Seesaw                  | 4 | Non-Chelate       | S-Donor  |         |
| 422 | TIPZIC   | 492 | Dimer Through Ligand   | Seesaw                  | 4 | Non-Chelate       | N-Donor  |         |
| 423 | TIRSIY   | 493 | Discrete Molecule      | Seesaw                  | 4 | Non-Chelate       | N-Donor  |         |
| 424 | TIZNOH   | 494 | Polymer Through Ligand | Seesaw                  | 4 | Non-Chelate       | N-Donor  | O-Donor |
| 425 | TMAHGB   | 495 | Polymer Through Anion  | Tetrahedral             | 4 | Metal Halide Only | Bromine  |         |
| 426 | TMAHGB01 | 496 | Polymer Through Anion  | Tetrahedral             | 4 | Metal Halide Only | Bromine  |         |
| 427 | TOBCOD   | 497 | Discrete Molecule      | Tetrahedral             | 4 | Metal Halide Only | Bromine  |         |
| 428 | TRPHGB   | 498 | Polymer Through Anion  | Tetrahedral             | 4 | Metal Halide Only | Bromine  |         |
| 429 | TSCHGB   | 499 | Discrete Molecule      | Seesaw                  | 4 | Non-Chelate       | N-Donor  |         |
| 430 | TUTLOL   | 500 | Dimer Through Anion    | Seesaw                  | 4 | Non-Chelate       | N-Donor  |         |
| 431 | TUYQAH   | 501 | Polymer Through Anion  | Trigonal Bipyramid      | 5 | Non-Chelate       | N-Donor  |         |
| 432 | UGUPAO   | 502 | Dimer Through Ligand   | Seesaw                  | 4 | Non-Chelate       | C-Donor  |         |
| 433 | UGUPES   | 503 | Dimer Through Ligand   | Seesaw                  | 4 | Non-Chelate       | C-Donor  |         |
| 434 | UGUPUH   | 504 | Dimer Through Anion    | Tetrahedral             | 4 | Metal Halide Only | Bromine  |         |
| 435 | UGUQAO   | 505 | Dimer Through Anion    | Tetrahedral             | 4 | Metal Halide Only | Bromine  |         |
|     |          | 506 | Discrete Molecule      | Linear                  | 2 | Metal Halide Only | Bromine  |         |
| 436 | UHABUA   | 507 | Discrete Molecule      | Seesaw                  | 4 | Non-Chelate       | S-Donor  |         |
| 437 | UKOTEU   | 508 | Discrete Molecule      | Tetrahedral             | 4 | Metal Halide Only | Bromine  |         |
| 438 | UPEWIW   | 509 | Polymer Through Anion  | Trigonal Bipyramid      | 5 | Non-Chelate       | N-Donor  |         |
|     |          | 510 | Polymer Through Anion  | Seesaw                  | 4 | Non-Chelate       | N-Donor  |         |
| 439 | UPUPEP   | 511 | Discrete Molecule      | Seesaw                  | 4 | Non-Chelate       | N-Donor  |         |
| 440 | UQUQED   | 512 | Discrete Molecule      | Seesaw                  | 4 | Non-Chelate       | N-Donor  |         |
| 441 | USUWOV   | 513 | Discrete Molecule      | Seesaw                  | 4 | Chelate           | P-Donor  | N-Donor |
| 442 | USUXEM   | 514 | Discrete Molecule      | Seesaw                  | 4 | Non-Chelate       | P-Donor  |         |
| 443 | USUYIR   | 515 | Discrete Molecule      | Seesaw                  | 4 | Chelate           | P-Donor  | N-Donor |
| 444 | USUYOX   | 516 | Polymer Through Anion  | D-Tetrahedral (Pyramid) | 4 | Non-Chelate       | N-Donor  | P-Donor |
|     |          | 517 | Polymer Through Ligand | D-Tetrahedral (Pyramid) | 4 | Non-Chelate       | N-Donor  | P-Donor |

|     |        |     |                        |                         |   |                   |          |          |
|-----|--------|-----|------------------------|-------------------------|---|-------------------|----------|----------|
| 445 | USUYUD | 518 | Discrete Molecule      | Seesaw                  | 4 | Non-Chelate       | P-Donor  |          |
| 446 | USUZE0 | 519 | Polymer Through Ligand | Seesaw                  | 4 | Non-Chelate       | P-Donor  | N-Donor  |
| 447 | VAGNEZ | 520 | Discrete Molecule      | Seesaw                  | 4 | Non-Chelate       | N-Donor  |          |
| 448 | VANDOF | 521 | Discrete Molecule      | Square Planar           | 4 | Non-Chelate       | Se-Donor |          |
| 449 | VAQHIE | 522 | Dimer Through Anion    | D-Square Pyramid        | 5 | Chelate           | O-Donor  | N-Donor  |
| 450 | VAXGEG | 523 | Dimer Through Anion    | D-Tetrahedral (Pyramid) | 4 | Non-Chelate       | P-Donor  |          |
| 451 | VAYHIO | 524 | Dimer Through Anion    | Seesaw                  | 4 | Non-Chelate       | C-Donor  |          |
|     |        | 525 | Dimer Through Anion    | Tetrahedral             | 4 | Metal Halide Only | Bromine  |          |
| 452 | VAZKIR | 526 | Polymer Through Anion  | D-Trigonal Bipyramid    | 5 | Non-Chelate       | S-Donor  |          |
| 453 | VEGRUW | 527 | Discrete Molecule      | Seesaw                  | 4 | Non-Chelate       | N-Donor  |          |
| 454 | VEMWUF | 528 | Polymer Through Anion  | Tetrahedral             | 4 | Metal Halide Only | Bromine  |          |
| 455 | VEQDOM | 529 | Discrete Molecule      | Tetrahedral             | 4 | Metal Halide Only | Bromine  |          |
| 456 | VEQJAE | 530 | Polymer Through Anion  | Square Pyramid          | 5 | Metal Halide Only | Bromine  |          |
| 457 | VEVBAZ | 531 | Polymer Through Anion  | Tetrahedral             | 4 | Metal Halide Only | Bromine  |          |
| 458 | VIFPAD | 532 | Dimer Through Anion    | Tetrahedral             | 4 | Metal Halide Only | Bromine  |          |
| 459 | VOBKED | 533 | Discrete Molecule      | Seesaw                  | 4 | Non-Chelate       | S-Donor  |          |
| 460 | VOFROX | 534 | Dimer Through Anion    | Tetrahedral             | 4 | Metal Halide Only | Bromine  |          |
| 461 | VOPXUT | 535 | Polymer Through Anion  | D-Tetrahedral (Pyramid) | 4 | Non-Chelate       | N-Donor  |          |
| 462 | VOVRIJ | 536 | Polymer Through Anion  | Trigonal Bipyramid      | 5 | Non-Chelate       | S-Donor  |          |
| 463 | VOVSAC | 537 | Polymer Through Anion  | D-Tetrahedral (Pyramid) | 4 | Non-Chelate       | S-Donor  |          |
| 464 | VOZGEW | 538 | Dimer Through Anion    | T-Shape                 | 3 | M-M Non-Chelate   | Iron     |          |
| 465 | VUHCEG | 539 | Discrete Molecule      | Tetrahedral             | 4 | Metal Halide Only | Bromine  |          |
| 466 | VUJYAB | 540 | Polymer Through Ligand | Bent                    | 4 | Non-Chelate       | N-Donor  |          |
| 467 | VUVNOQ | 541 | Discrete Molecule      | Trigonal                | 3 | Non-Chelate       | P-Donor  |          |
| 468 | VUXLIK | 542 | Discrete Molecule      | Tetrahedral             | 4 | Metal Halide Only | Iron     |          |
| 469 | VUXLOQ | 543 | Discrete Molecule      | Tetrahedral             | 4 | Metal Halide Only | Bromine  |          |
| 470 | WAMYUF | 544 | Polymer Through Ligand | D-Octahedral            | 6 | Non-Chelate       | S-Donor  |          |
| 471 | WAMZAM | 545 | Discrete Molecule      | Seesaw                  | 4 | Non-Chelate       | S-Donor  |          |
| 472 | WAYPAP | 546 | Dimer Through Anion    | Bent                    | 4 | Non-Chelate       | P-Donor  | Se-donor |
| 473 | WEBZOS | 547 | Discrete Molecule      | Seesaw                  | 4 | Non-Chelate       | P-Donor  |          |
| 474 | WEBZUY | 548 | Dimer Through Anion    | D-Tetrahedral (Pyramid) | 4 | Non-Chelate       | P-Donor  |          |
| 475 | WEDVOQ | 549 | Dimer Through Anion    | Seesaw                  | 4 | Non-Chelate       | P-Donor  |          |
| 476 | WEQMIP | 550 | Polymer Through Anion  | Trigonal Bipyramid      | 5 | Non-Chelate       | N-Donor  |          |
|     |        | 551 | Polymer Through Ligand | Seesaw                  | 4 | Non-Chelate       | N-Donor  |          |
| 477 | WIBJUO | 552 | Discrete Molecule      | Tetrahedral             | 4 | Metal Halide Only | Bromine  |          |
| 478 | WIDZIS | 553 | Tetramer Through Anion | Seesaw                  | 4 | Metal Halide Only | S-Donor  |          |
| 479 | WIVTAY | 554 | Dimer Through Anion    | T-Shape                 | 3 | Non-Chelate       | Boron    |          |
| 480 | WODDAU | 555 | Discrete Molecule      | Seesaw                  | 4 | Non-Chelate       | S-Donor  |          |
| 481 | WOGMUB | 556 | Dimer Through Anion    | D-Trigonal Bipyramid    | 5 | Non-Chelate       | N-Donor  |          |
| 482 | WOKNUF | 557 | Discrete Molecule      | Seesaw                  | 4 | Non-Chelate       | N-Donor  |          |
| 483 | WOLLUE | 558 | Discrete Molecule      | Seesaw                  | 4 | Non-Chelate       | P-Donor  |          |
| 484 | WOLMAL | 559 | Dimer Through Anion    | D-Tetrahedral (Pyramid) | 4 | Non-Chelate       | P-Donor  |          |
| 485 | WONKIT | 560 | Dimer Through Anion    | D-Square Pyramid        | 5 | Non-Chelate       | P-Donor  | O-Donor  |
| 486 | WOPTUR | 561 | Dimer Through Anion    | D-Tetrahedral (Pyramid) | 4 | Non-Chelate       | C-Donor  |          |
| 487 | WOPVAZ | 562 | Dimer Through Anion    | D-Tetrahedral (Pyramid) | 4 | Non-Chelate       | C-Donor  |          |
| 488 | WOPYAD | 563 | Discrete Molecule      | Seesaw                  | 4 | Chelate           | C-Donor  | P-Donor  |
| 489 | WURPOP | 564 | Polymer Through Anion  | D-Trigonal Bipyramid    | 5 | Metal Halide Only | Bromine  |          |
| 490 | WURXUC | 565 | Dimer Through Anion    | Tetrahedral             | 4 | Metal Halide Only | Bromine  |          |
| 491 | WUZHEF | 566 | Polymer Through Ligand | Seesaw                  | 4 | Non-Chelate       | N-Donor  |          |
| 492 | XAHSAB | 567 | Dimer Through Ligand   | Seesaw                  | 4 | Non-Chelate       | N-Donor  |          |
| 493 | XAHSUX | 568 | Discrete Molecule      | T-Shape                 | 5 | Chelate           | N-Donor  | O-Donor  |
| 494 | XAKHIA | 569 | Trimer Through Anion   | Square Planar           | 4 | Metal Halide Only | Bromine  |          |
|     |        | 570 | Trimer Through Anion   | Trigonal Pyramid        | 4 | M-M Non-Chelate   | Platinum |          |
| 495 | XAKZUG | 571 | Polymer Through Ligand | Seesaw                  | 4 | Non-Chelate       | N-Donor  |          |
| 496 | XECXUA | 572 | Discrete Molecule      | T-Shape                 | 5 | Non-Chelate       | N-Donor  | O-Donor  |
| 497 | XELQIP | 573 | Polymer Through Anion  | D-Tetrahedral (Pyramid) | 4 | Non-Chelate       | S-Donor  |          |
| 498 | XEMVAO | 574 | Discrete Molecule      | Tetrahedral             | 4 | Metal Halide Only | Bromine  |          |
| 499 | XEZPAT | 575 | Dimer Through Ligand   | Seesaw                  | 4 | Non-Chelate       | P-Donor  |          |
| 500 | XIPWAV | 576 | Polymer Through Ligand | Seesaw                  | 4 | Non-Chelate       | N-Donor  |          |
| 501 | XUDHAG | 577 | Polymer Through Ligand | Seesaw                  | 4 | Non-Chelate       | N-Donor  |          |
| 502 | XUDHIO | 578 | Dimer Through Ligand   | Seesaw                  | 4 | Non-Chelate       | N-Donor  |          |
| 503 | XUFDIN | 579 | Polymer Through Ligand | Seesaw                  | 4 | Non-Chelate       | N-Donor  |          |



|     |        |     |                        |                         |   |                   |           |         |
|-----|--------|-----|------------------------|-------------------------|---|-------------------|-----------|---------|
| 504 | YACDOX | 580 | Dimer Through Ligand   | Seesaw                  | 4 | Non-Chelate       | N-Donor   |         |
| 505 | YACHIU | 581 | Trimer Through Anion   | T-Shape                 | 5 | Non-Chelate       | N-Donor   | S-Donor |
|     |        | 582 | Trimer Through Anion   | D-Tetrahedral (Pyramid) | 4 | Non-Chelate       | N-Donor   | S-Donor |
| 506 | YARNEL | 583 | Polymer Through Anion  | Tetrahedral             | 4 | Metal Halide Only | Bromine   |         |
| 507 | YEJDIB | 584 | Discrete Molecule      | Seesaw                  | 4 | Non-Chelate       | Tellurium |         |
| 508 | YEVFIO | 585 | Discrete Molecule      | T-Shape                 | 6 | Non-Chelate       | C-Donor   |         |
| 509 | YEZGAL | 586 | Polymer Through Anion  | Seesaw                  | 4 | Non-Chelate       | O-Donor   |         |
|     |        | 587 | Polymer Through Anion  | T-Shape                 | 5 | Metal Halide Only | Bromine   |         |
|     |        | 588 | Polymer Through Anion  | T-Shape                 | 3 | Metal Halide Only | Bromine   |         |
| 510 | YODZUM | 589 | Discrete Molecule      | Tetrahedral             | 4 | Metal Halide Only | Bromine   |         |
| 511 | YUDZIG | 590 | Polymer Through Ligand | D-Octahedral            | 6 | Non-Chelate       | S-Donor   |         |
| 512 | YUHTUR | 591 | Discrete Molecule      | Seesaw                  | 4 | Non-Chelate       | S-Donor   |         |
| 513 | YUNLEZ | 592 | Polymer Through Ligand | Seesaw                  | 4 | Non-Chelate       | N-Donor   |         |
| 514 | ZADMAV | 593 | Dimer Through Ligand   | Seesaw                  | 4 | Non-Chelate       | N-Donor   |         |
| 515 | ZATJOT | 594 | Dimer Through Anion    | Seesaw                  | 4 | Chelate           | N-Donor   |         |
| 516 | ZEFRAF | 595 | Polymer Through Ligand | Seesaw                  | 4 | Non-Chelate       | N-Donor   |         |
| 517 | ZEVMEU | 596 | Discrete Molecule      | Seesaw                  | 4 | Chelate           | N-Donor   |         |
| 518 | ZIVXAF | 597 | Polymer Through Anion  | Seesaw                  | 4 | Metal Halide Only | Chlorine  |         |
| 519 | ZIVXEJ | 598 | Polymer Through Anion  | Seesaw                  | 4 | Metal Halide Only | Bromine   |         |
| 520 | ZUBMOY | 599 | Dimer Through Anion    | Seesaw                  | 4 | Metal Halide Only | Chlorine  |         |
| 521 | ZUFREZ | 600 | Dimer Through Anion    | Seesaw                  | 4 | Non-Chelate       | C-Donor   |         |
| 522 | ZUWJAC | 601 | Discrete Molecule      | Seesaw                  | 4 | Non-Chelate       | S-Donor   |         |

## S29. CSD-Analysis for HgI<sub>2</sub> Compounds

| Number | Ref. Code | Hits | Polymerization Mode    | Geometry           | C.N. | Chelation Mode    | Donor Atom of Ligand |
|--------|-----------|------|------------------------|--------------------|------|-------------------|----------------------|
| 1      | ATAHAG    | 1    | Polymer Through Ligand | Seesaw             | 4    | Non-Chelate       | S-Donor              |
| 2      | ATEQAT    | 2    | Dimer Through Anion    | Tetrahedral        | 4    | Metal Halide Only | Iodine               |
| 3      | AVIYUB    | 3    | Discrete Molecule      | Tetrahedral        | 4    | Metal Halide Only | Iodine               |
| 4      | AVONIK    | 4    | Dimer Through Anion    | D-Tetrahedral (Py) | 4    | Non-Chelate       | N-Donor              |
| 5      | ORUZEI    | 5    | Polymer Through Ligand | Seesaw             | 4    | Non-Chelate       | N-Donor              |
| 6      | ORUZIM    | 6    | Polymer Through Ligand | Seesaw             | 4    | Metal Halide Only | Chlorine             |
| 7      | UXAZUQ    | 7    | Dimer Through Anion    | Tetrahedral        | 4    | Metal Halide Only | Iodine               |
| 8      | ABIXAM    | 8    | Polymer Through Ligand | Seesaw             | 4    | Non-Chelate       | N-Donor              |
| 9      | ACAGOC    | 9    | Dimer Through Ligand   | Seesaw             | 4    | Non-Chelate       | N-Donor              |
| 10     | ADIZES    | 10   | Discrete Molecule      | Seesaw             | 4    | Non-Chelate       | Tellurium            |
| 11     | ADOKOU    | 11   | Polymer Through Anion  | D-Tetrahedral (Py) | 4    | Non-Chelate       | N-Donor              |
| 12     | ADOKUA    | 12   | Polymer Through Anion  | D-Tetrahedral (Py) | 4    | Non-Chelate       | N-Donor              |
| 13     | ADOLAH    | 13   | Polymer Through Anion  | D-Tetrahedral (Py) | 4    | Non-Chelate       | N-Donor              |
| 14     | ADOLEL    | 14   | Discrete Molecule      | Seesaw             | 4    | Non-Chelate       | N-Donor              |
| 15     | AFEYIV    | 15   | Dimer Through Anion    | Tetrahedral        | 4    | Metal Halide Only | Iodine               |
| 16     | AFEYOB    | 16   | Dimer Through Anion    | Tetrahedral        | 4    | Metal Halide Only | Iodine               |
|        |           | 17   | Discrete Molecule      | Tetrahedral        | 4    | Metal Halide Only | Iodine               |
|        |           | 18   | Discrete Molecule      | Tetrahedral        | 4    | Metal Halide Only | Iodine               |
| 18     | AFEZAO    | 19   | Discrete Molecule      | Tetrahedral        | 4    | Metal Halide Only | Iodine               |
| 19     | AGOMAM    | 20   | Polymer Through Ligand | Seesaw             | 4    | Non-Chelate       | N-Donor              |
| 20     | AGOMEQ    | 21   | Polymer Through Ligand | Seesaw             | 4    | Non-Chelate       | N-Donor              |
| 21     | AGOXOK    | 22   | Polymer Through Ligand | Seesaw             | 4    | Non-Chelate       | N-Donor              |
| 22     | AHOMAL    | 23   | Discrete Molecule      | Seesaw             | 4    | Chelate           | Se-donor             |
| 23     | AJAJEB    | 24   | Discrete Molecule      | Seesaw             | 4    | Non-Chelate       | Se-Donor             |
| 24     | AKULUN    | 25   | Dimer Through Anion    | D-Tetrahedral (Py) | 4    | Non-Chelate       | P-Donor              |
| 25     | AKUMAU    | 26   | Dimer Through Anion    | D-Tetrahedral (Py) | 4    | Non-Chelate       | P-Donor              |
| 26     | AQAXEX    | 27   | Dimer Through Anion    | D-Tetrahedral (Py) | 4    | Non-Chelate       | N-Donor              |
| 27     | AQEDUX    | 28   | Discrete Molecule      | Tetrahedral        | 4    | Metal Halide Only | Iodine               |
| 28     | AQEFIN    | 29   | Discrete Molecule      | D-Tetrahedral (Py) | 4    | Non-Chelate       | N-Donor              |
| 29     | AQEGAG    | 30   | Polymer Through Ligand | Seesaw             | 4    | Non-Chelate       | N-Donor              |
| 30     | AQEGOU    | 31   | Dimer Through Anion    | Tetrahedral        | 4    | Metal Halide Only | Iodine               |
| 31     | ARUKAZ    | 32   | Dimer Through Anion    | Tetrahedral        | 4    | Metal Halide Only | Iodine               |
| 32     | ARUKED    | 33   | Dimer Through Anion    | Tetrahedral        | 4    | Metal Halide Only | Iodine               |
| 33     | ATOGUL    | 34   | Discrete Molecule      | Seesaw             | 4    | Chelate           | S-Donor              |
| 34     | AXEDIQ    | 35   | Dimer Through Anion    | Seesaw             | 4    | Non-Chelate       | C-Donor              |

|    |          |    |                        |                    |   |                   |                   |
|----|----------|----|------------------------|--------------------|---|-------------------|-------------------|
| 35 | AZATUQ   | 36 | Discrete Molecule      | Tetrahedral        | 4 | Metal Halide Only | Iodine            |
| 36 | AZEBIQ   | 37 | Tetramer Through Anion | Tetrahedral        | 4 | Metal Halide Only | Iodine            |
| 37 | AZIWUC   | 38 | Discrete Molecule      | Tetrahedral        | 4 | Chelate           | N-Donor           |
| 38 | AZODOJ   | 39 | Polymer Through Ligand | T-Shape            | 5 | Chelate           | N-Donor           |
| 39 | BAHKAY   | 40 | Dimer Through Ligand   | Seesaw             | 4 | Non-Chelate       | N-Donor           |
| 40 | BAKJOM   | 41 | Polymer Through Ligand | Seesaw             | 4 | Non-Chelate       | N-Donor           |
| 41 | BAKKED   | 42 | Polymer Through Ligand | Seesaw             | 4 | Non-Chelate       | N-Donor           |
| 42 | BAKNOQ   | 43 | Polymer Through Ligand | Seesaw             | 4 | Non-Chelate       | N-Donor           |
| 43 | BAKREK01 | 44 | Polymer Through Ligand | Seesaw             | 4 | Non-Chelate       | N-Donor           |
| 44 | BEJLEH   | 45 | Discrete Molecule      | Seesaw             | 4 | Non-Chelate       | N-Donor           |
| 45 | BEJLEH01 | 46 | Discrete Molecule      | Seesaw             | 4 | Non-Chelate       | N-Donor           |
| 46 | BEJLEH02 | 47 | Discrete Molecule      | Seesaw             | 4 | Non-Chelate       | N-Donor           |
| 47 | BEKDOL   | 48 | Polymer Through Ligand | Seesaw             | 4 | Non-Chelate       | N-Donor           |
| 48 | BENMAJ   | 49 | Dimer Through Ligand   | Seesaw             | 4 | Non-Chelate       | S-Donor   N-Donor |
| 49 | BESJEP   | 50 | Polymer Through Ligand | Seesaw             | 4 | Non-Chelate       | N-Donor           |
| 50 | BETPEV   | 51 | Discrete Molecule      | Trigonal           | 3 | Metal Halide Only | Iodine            |
| 51 | BEVDUD   | 52 | Discrete Molecule      | Seesaw             | 4 | Chelate           | N-Donor           |
| 52 | BIFHO0   | 53 | Dimer Through Anion    | Tetrahedral        | 4 | Metal Halide Only | Iodine            |
| 53 | BIYYIS   | 54 | Dimer Through Anion    | D-Tetrahedral (Py) | 4 | Non-Chelate       | C-Donor           |
| 54 | BOLLET   | 55 | Dimer Through Anion    | D-Tetrahedral (Py) | 4 | Non-Chelate       | S-Donor           |
| 55 | BONJEU   | 56 | Discrete molecule      | Trigonal Pyramid   | 4 | Non-Chelate       | C-Donor   O-Donor |
| 56 | BUBWAY   | 57 | Polymer Through Anion  | D-Tetrahedral (Py) | 4 | Non-Chelate       | N-Donor           |
|    |          | 58 | Polymer Through Ligand | D-Tetrahedral (Py) | 4 | Non-Chelate       | N-Donor           |
| 57 | BUBZAB   | 59 | polymer through ligand | Seesaw             | 4 | Non-Chelate       | N-Donor           |
| 58 | BURLUX   | 60 | Dimer Through Ligand   | Seesaw             | 4 | Non-Chelate       | N-Donor           |
| 59 | BUSGEC   | 61 | Discrete Molecule      | Seesaw             | 4 | Non-Chelate       | C-Donor           |
| 60 | BUTZEX   | 62 | Polymer Through Anion  | D-Square Pyramid   | 5 | Non-Chelate       | N-Donor           |
|    |          | 63 | Polymer Through Ligand | D-Square Pyramid   | 5 | Non-Chelate       | N-Donor           |
| 61 | BUVZUP   | 64 | Dimer Through Anion    | Seesaw             | 4 | Non-Chelate       | S-Donor           |
| 62 | CABFIX   | 65 | Dimer Through Anion    | Seesaw             | 4 | Non-Chelate       | S-Donor           |
| 63 | CADCEQ   | 66 | Discrete molecule      | Seesaw             | 4 | Chelate           | P-Donor           |
| 64 | CAGPIK   | 67 | Discrete Molecule      | D-Tetrahedral (Py) | 4 | Chelate   M-M     | N-Donor   Rhodium |
| 65 | CALYOD   | 68 | Dimer Through Anion    | Tetrahedral        | 4 | Metal Halide Only | Iodine            |
| 66 | CALYUJ   | 69 | Dimer Through Anion    | Tetrahedral        | 4 | Metal Halide Only | Iodine            |
| 67 | CAMBIB   | 70 | Dimer Through Anion    | Tetrahedral        | 4 | Metal Halide Only | Iodine            |
| 68 | CAMBOH   | 71 | Dimer Through Anion    | Tetrahedral        | 4 | Metal Halide Only | Iodine            |
| 69 | CAYBIN   | 72 | Discrete Molecule      | Seesaw             | 4 | Chelate           | P-Donor           |
| 70 | CECYOZ   | 73 | Polymer Through Ligand | Seesaw             | 4 | Non-Chelate       | N-Donor           |
| 71 | CECYUF   | 74 | Polymer Through Ligand | Seesaw             | 4 | Non-Chelate       | N-Donor           |
| 72 | CEKHOR   | 75 | Polymer Through Anion  | Square Pyramid     | 5 | Non-Chelate       | N-Donor           |
| 73 | CEKJEJ   | 76 | Discrete Molecule      | T-Shape            | 3 | Non-Chelate       | N-Donor           |
| 74 | CEKYUO   | 77 | Discrete Molecule      | D-Tetrahedral (Py) | 4 | Chelate           | N-Donor           |
| 75 | CELYAT   | 78 | Tetramer Through Anion | D-Tetrahedral (Py) | 4 | Non-Chelate       | Tellurium         |
| 76 | CETJIV   | 79 | Tetramer Through Anion | D-Tetrahedral (Py) | 4 | Non-Chelate       | N-Donor           |
|    |          | 80 | Tetramer Through Anion | D-Octahedral       | 6 | Non-Chelate       | N-Donor           |
| 77 | CIDLIM   | 81 | Discrete Molecule      | T-Shape            | 3 | Non-Chelate       | N-Donor           |
| 78 | CIDMAF   | 82 | Discrete Molecule      | T-Shape            | 3 | Non-Chelate       | N-Donor           |
| 79 | CIDMOT   | 83 | Discrete Molecule      | T-Shape            | 3 | Non-Chelate       | N-Donor           |
| 80 | CINPAQ   | 84 | Dimer Through Anion    | Tetrahedral        | 4 | Metal Halide Only | Iodine            |
| 81 | CIPTAW   | 85 | Discrete Molecule      | Seesaw             | 4 | Non-Chelate       | P-Donor           |
| 82 | CIYZOA   | 86 | Polymer Through Ligand | D-Tetrahedral (Py) | 4 | Non-Chelate       | N-Donor           |
|    |          | 87 | Polymer Through Ligand | Linear             | 2 | Non-Chelate       | N-Donor           |
| 83 | CIZBAP   | 88 | Polymer Through Ligand | Seesaw             | 4 | Non-Chelate       | N-Donor           |
| 84 | CNPSHG   | 89 | Discrete Molecule      | Tetrahedral        | 4 | Metal Halide Only | Iodine            |
| 85 | COLRUR   | 90 | Polymer Through Ligand | Seesaw             | 4 | Non-Chelate       | N-Donor           |
| 86 | CORLAX   | 91 | Polymer Through Anion  | Tetrahedral        | 4 | Metal Halide Only | Iodine            |
| 87 | CORLEB   | 92 | Polymer Through Anion  | Trigonal Pyramid   | 4 | Metal Halide Only | Iodine            |
|    |          | 93 | Polymer Through Anion  | Tetrahedral        | 4 | Metal Halide Only | Iodine            |
| 88 | CUDQUN   | 94 | Discrete Molecule      | Seesaw             | 4 | Chelate           | N-Donor           |
| 89 | CUDRIC   | 95 | Discrete Molecule      | Seesaw             | 4 | Chelate           | N-Donor           |
| 90 | CUDWIH   | 96 | Discrete Molecule      | Seesaw             | 4 | Chelate           | N-Donor           |
| 91 | CUGFIT   | 97 | Dimer Through Anion    | Tetrahedral        | 4 | Metal Halide Only | Iodine            |

|     |          |     |                         |                      |   |                   |          |         |         |      |
|-----|----------|-----|-------------------------|----------------------|---|-------------------|----------|---------|---------|------|
| 92  | CUGFIT01 | 98  | Dimer Through Anion     | Tetrahedral          | 4 | Metal Halide Only | Iodine   |         |         |      |
| 93  | CUSBIC   | 99  | Discrete Molecule       | T-Shape              | 5 | Chelate           | N-Donor  |         |         |      |
| 94  | CUSSAL   | 100 | Dimer Through Anion     | Seesaw               | 4 | Non-Chelate       | N-Donor  |         |         |      |
| 95  | CUYFAE   | 101 | Discrete Molecule       | T-Shape              | 3 | Non-Chelate       | N-Donor  |         |         |      |
| 96  | DAHYES   | 102 | Discrete Molecule       | Seesaw               | 4 | Chelate           | N-Donor  |         |         |      |
| 97  | DAKLIM   | 103 | Polymer Through Ligand  | Seesaw               | 4 | Non-Chelate       | N-Donor  |         |         |      |
| 98  | DAXPAV   | 104 | Polymer Through Ligand  | Seesaw               | 4 | Non-Chelate       | S-Donor  |         |         |      |
| 99  | DEBHID   | 105 | Discrete Molecule       | Seesaw               | 4 | Chelate           | N-Donor  |         |         |      |
| 100 | DEBMEC   | 106 | Polymer Through Anion   | Tetrahedral          | 4 | Metal Halide Only | Iodine   |         |         |      |
| 101 | DEBWIR   | 107 | Dimer Through Anion     | Tetrahedral          | 4 | Metal Halide Only | Iodine   |         |         |      |
| 102 | DENLEO   | 108 | Tetramer Through Ligand | Seesaw               | 4 | Non-Chelate       | S-Donor  |         |         |      |
| 103 | DENZUR   | 109 | Discrete Molecule       | Hexagonal Bipyramid  | 8 | Non-Chelate       | O-Donor  |         |         |      |
| 104 | DENZUR01 | 110 | Discrete Molecule       | Hexagonal Bipyramid  | 8 | Non-Chelate       | O-Donor  |         |         |      |
| 105 | DENZUR02 | 111 | Discrete Molecule       | Hexagonal Bipyramid  | 8 | Non-Chelate       | O-Donor  |         |         |      |
| 106 | DENZUR03 | 112 | Discrete Molecule       | Hexagonal Bipyramid  | 8 | Non-Chelate       | O-Donor  |         |         |      |
| 107 | DEPDUY   | 113 | Dimer Through Ligand    | Seesaw               | 4 | Non-Chelate       | N-Donor  |         |         |      |
| 108 | DEYTAD   | 114 | Polymer Through Ligand  | Seesaw               | 4 | Non-Chelate       | N-Donor  |         |         |      |
| 109 | DICGOL   | 115 | Dimer Through Anion     | D-Tetrahedral (Py)   | 4 | Non-Chelate       | S-Donor  |         |         |      |
| 110 | DILTOH   | 116 | Discrete Molecule       | Trigonal             | 3 | Metal Halide Only | Iodine   |         |         |      |
| 111 | DIRCEO   | 117 | Discrete Molecule       | Seesaw               | 4 | Chelate           | N-Donor  |         |         |      |
| 112 | DISPUR   | 118 | Discrete Molecule       | Seesaw               | 4 | Chelate           | Se-Donor |         |         |      |
| 113 | DISQAY   | 119 | Dimer Through Ligand    | Seesaw               | 4 | Chelate           | Se-Donor |         |         |      |
| 114 | DITCUE   | 120 | Discrete Molecule       | Seesaw               | 4 | Chelate           | N-Donor  |         |         |      |
| 115 | DITPHG   | 121 | Discrete Molecule       | Seesaw               | 4 | Non-Chelate       | P-Donor  |         |         |      |
| 116 | DODJUC   | 122 | Polymer Through Ligand  | D-Trigonal Bipyramid | 5 | Non-Chelate       | O-Donor  | N-Donor |         |      |
| 117 | DOHBOR   | 123 | Polymer Through Ligand  | Seesaw               | 4 | Non-Chelate       | S-Donor  |         |         |      |
| 118 | DOXYEU   | 124 | Dimer Through Anion     | Tetrahedral          | 4 | Metal Halide Only | Iodine   |         |         |      |
| 119 | DUFHOB10 | 125 | Discrete Molecule       | Tetrahedral          | 4 | Metal Halide Only | Iodine   |         |         |      |
| 120 | DUGCEN   | 126 | Discrete Molecule       | D-Square Pyramid     | 5 | Chelate           | M-M      | N-Donor | C-Donor | Iron |
| 121 | DUGDOY   | 127 | Dimer Through Anion     | Tetrahedral          | 4 | Metal Halide Only | Iodine   |         |         |      |
| 122 | DUKGUM   | 128 | Dimer Through Anion     | Tetrahedral          | 4 | Metal Halide Only | Iodine   |         |         |      |
| 123 | DURROY   | 129 | Discrete Molecule       | Seesaw               | 4 | Chelate           | N-Donor  |         |         |      |
| 124 | DUWSEU   | 130 | Dimer Through Anion     | D-Tetrahedral (Py)   | 4 | Non-Chelate       | C-Donor  |         |         |      |
| 125 | DUWVOI   | 131 | Tetramer Through Anion  | Trigonal Bipyramid   | 5 | Non-Chelate       | O-Donor  | C-Donor | N-Donor |      |
|     |          | 132 | Tetramer Through Anion  | Tetrahedral          | 4 | Metal Halide Only | Iodine   |         |         |      |
| 126 | DUWVUO   | 133 | Discrete Molecule       | Tetrahedral          | 4 | Metal Halide Only | Iodine   |         |         |      |
| 127 | DUWWAV   | 134 | Discrete Molecule       | Tetrahedral          | 4 | Metal Halide Only | Iodine   |         |         |      |
| 128 | DUXKAI   | 135 | Dimer Through Ligand    | Seesaw               | 4 | Non-Chelate       | S-Donor  |         |         |      |
| 129 | DUZFIN   | 136 | Dimer Through Anion     | D-Tetrahedral (Py)   | 4 | Non-Chelate       | S-Donor  |         |         |      |
| 130 | EAHIHG   | 137 | Polymer Through Anion   | D-Tetrahedral (Py)   | 4 | Non-Chelate       | S-Donor  |         |         |      |
|     |          | 138 | Polymer Through Ligand  | D-Tetrahedral (Py)   | 4 | Non-Chelate       | S-Donor  |         |         |      |
| 131 | ECIYUL   | 139 | Polymer Through Anion   | D-Tetrahedral (Py)   | 4 | Non-Chelate       | S-Donor  |         |         |      |
|     |          | 140 | Polymer Through Ligand  | Tetrahedral          | 4 | Metal Halide Only | Iodine   |         |         |      |
| 132 | EDUVOP   | 141 | Discrete Molecule       | Tetrahedral          | 4 | Metal Halide Only | Iodine   |         |         |      |
| 133 | EFIGIL   | 142 | Dimer Through Anion     | Tetrahedral          | 4 | Metal Halide Only | Iodine   |         |         |      |
| 134 | EFIGOR   | 143 | Dimer Through Anion     | Tetrahedral          | 4 | Metal Halide Only | Iodine   |         |         |      |
| 135 | EIMTIM   | 144 | Dimer Through Anion     | Tetrahedral          | 4 | Metal Halide Only | Iodine   |         |         |      |
| 136 | EJAGUS   | 145 | Polymer Through Ligand  | Seesaw               | 4 | Non-Chelate       | N-Donor  |         |         |      |
| 137 | EJOZIM   | 146 | Discrete Molecule       | Tetrahedral          | 4 | Metal Halide Only | Iodine   |         |         |      |
| 138 | EJOZUY   | 147 | Discrete Molecule       | Tetrahedral          | 4 | Metal Halide Only | Iodine   |         |         |      |
| 139 | EJOZUY01 | 148 | Discrete Molecule       | Tetrahedral          | 4 | Metal Halide Only | Iodine   |         |         |      |
| 140 | EJUBEQ   | 149 | Discrete Molecule       | Tetrahedral          | 4 | Metal Halide Only | Iodine   |         |         |      |
| 141 | EJUBIU   | 150 | Discrete Molecule       | Tetrahedral          | 4 | Metal Halide Only | Iodine   |         |         |      |
| 142 | EJUBOA   | 151 | Discrete Molecule       | Tetrahedral          | 4 | Metal Halide Only | Iodine   |         |         |      |
| 143 | EJUBOA01 | 152 | Discrete Molecule       | Tetrahedral          | 4 | Metal Halide Only | Iodine   |         |         |      |
| 144 | EJUBUG   | 153 | Discrete Molecule       | Tetrahedral          | 4 | Metal Halide Only | Iodine   |         |         |      |
| 145 | ELEWAU   | 154 | Dimer Through Anion     | Tetrahedral          | 4 | Metal Halide Only | Iodine   |         |         |      |
|     |          | 155 | Dimer Through Anion     | D-Tetrahedral (Py)   | 4 | Non-Chelate       | N-Donor  |         |         |      |
| 146 | ELEWEY   | 156 | Polymer Through Anion   | T-Shape              | 3 | Non-Chelate       | N-Donor  |         |         |      |
|     |          | 157 | Polymer Through Ligand  | Trigonal Pyramid     | 3 | Non-Chelate       | N-Donor  |         |         |      |
|     |          | 158 | Polymer Through Ligand  | Seesaw               | 4 | Non-Chelate       | N-Donor  |         |         |      |
| 147 | ELURAG   | 159 | Polymer Through Anion   | Seesaw               | 4 | Non-Chelate       | N-Donor  |         |         |      |
|     |          | 160 | Polymer Through Ligand  | Seesaw               | 4 | Non-Chelate       | N-Donor  |         |         |      |

|     |          |     |                         |                      |   |                   |          |         |
|-----|----------|-----|-------------------------|----------------------|---|-------------------|----------|---------|
| 148 | EMIFOX   | 161 | Discrete Molecule       | T-Shape              | 3 | Non-Chelate       | N-Donor  |         |
| 149 | EMINOF   | 162 | Discrete Molecule       | T-Shape              | 3 | Non-Chelate       | N-Donor  |         |
| 150 | ENORUV   | 163 | Discrete Molecule       | T-Shape              | 5 | Chelate           | O-Donor  |         |
| 151 | ENTIHG   | 164 | Polymer Through Anion   | Trigonal Bipyramid   | 4 | Non-Chelate       | N-Donor  |         |
|     |          | 165 | Polymer Through Anion   | Tetrahedral          | 4 | Non-Chelate       | N-Donor  |         |
| 152 | EROLIG   | 166 | Polymer Through Anion   | D-Tetrahedral (Py)   | 4 | Non-Chelate       | S-Donor  |         |
|     |          | 167 | Polymer Through Anion   | Seesaw               | 4 | Non-Chelate       | S-Donor  |         |
| 153 | ERUWUK   | 168 | Discrete Molecule       | Seesaw               | 4 | Non-Chelate       | S-Donor  |         |
| 154 | ERUXAR   | 169 | Dimer Through Anion     | Seesaw               | 4 | Non-Chelate       | S-Donor  |         |
|     |          | 170 | Dimer Through Anion     | T-Shape              | 3 | Non-Chelate       | S-Donor  |         |
| 155 | ERUXEV   | 171 | Dimer Through Anion     | D-Tetrahedral (Py)   | 4 | Non-Chelate       | S-Donor  |         |
| 156 | EWOREN   | 172 | Dimer Through Ligand    | T-Shape              | 3 | Non-Chelate       | N-Donor  |         |
| 157 | EWOREN01 | 173 | Dimer Through Anion     | Seesaw               | 4 | Non-Chelate       | N-Donor  |         |
| 158 | EXEROO   | 174 | Tetramer Through Anion  | Square Pyramid       | 5 | Chelate           | O-Donor  | P-Donor |
|     |          | 175 | Tetramer Through Anion  | Tetrahedral          | 4 | Metal Halide Only | Iodine   |         |
| 159 | EYAFUG   | 176 | Dimer Through Anion     | D-Tetrahedral (Py)   | 4 | Non-Chelate       | C-Donor  |         |
| 160 | EYUXAY   | 177 | Discrete Molecule       | Tetrahedral          | 4 | Metal Halide Only | Iodine   |         |
| 161 | FAGGUR   | 178 | Discrete Molecule       | Tetrahedral          | 4 | Metal Halide Only | Iodine   |         |
| 162 | FAHWES   | 179 | Discrete Molecule       | Tetrahedral          | 4 | Metal Halide Only | Iodine   |         |
| 163 | FAHXOE   | 180 | Dimer Through Anion     | Tetrahedral          | 4 | Metal Halide Only | Iodine   |         |
| 164 | FAQVOJ   | 181 | Discrete Molecule       | Tetrahedral          | 4 | Metal Halide Only | Iodine   |         |
| 165 | FARXON   | 182 | Dimer Through Anion     | D-Trigonal Bipyramid | 5 | Chelate           | N-Donor  |         |
| 166 | FAXGUI   | 183 | Polymer Through Ligand  | Seesaw               | 4 | Non-Chelate       | N-Donor  |         |
| 167 | FAXHUJ   | 184 | Dimer Through Ligand    | Seesaw               | 4 | Non-Chelate       | N-Donor  |         |
| 168 | FAXKEV   | 185 | Discrete Molecule       | Tetrahedral          | 4 | Metal Halide Only | Iodine   |         |
| 169 | FAYKEW   | 186 | Discrete Molecule       | Seesaw               | 4 | Chelate           | O-Donor  |         |
| 170 | FELZEC   | 187 | Discrete Molecule       | Seesaw               | 4 | Chelate           | S-Donor  |         |
| 171 | FIJPAQ   | 188 | Polymer Through Ligand  | Seesaw               | 4 | Non-Chelate       | N-Donor  |         |
| 172 | FIPWUX   | 189 | Discrete Molecule       | Seesaw               | 4 | Chelate           | N-Donor  | S-Donor |
| 173 | FIPXOS   | 190 | Dimer Through Ligand    | Seesaw               | 4 | Chelate           | N-Donor  | S-Donor |
| 174 | FOTNEJ   | 191 | Polymer Through Anion   | D-Square Pyramid     | 5 | Chelate           | N-Donor  |         |
|     |          | 192 | Polymer Through Anion   | Tetrahedral          | 4 | Metal Halide Only | Iodine   |         |
| 175 | FOVCIE   | 193 | Tetramer Through Anion  | Trigonal Bipyramid   | 5 | Chelate           | O-Donor  | S-Donor |
|     |          | 194 | Tetramer Through Ligand | Tetrahedral          | 4 | Chelate           | O-Donor  | S-Donor |
| 176 | FOVCUQ   | 195 | Discrete Molecule       | Tetrahedral          | 4 | Metal Halide Only | Iodine   |         |
| 177 | FOZXAV   | 196 | Dimer Through Anion     | Seesaw               | 4 | Non-Chelate       | Chlorine |         |
| 178 | FOZXEZ   | 197 | Discrete Molecule       | Seesaw               | 4 | Chelate           | C-Donor  |         |
| 179 | FOZXID   | 198 | Discrete Molecule       | Seesaw               | 4 | Chelate           | C-Donor  |         |
| 180 | FOZXOJ   | 199 | Dimer Through Anion     | Tetrahedral          | 4 | Metal Halide Only | Iodine   |         |
| 181 | FUBVOP   | 200 | Discrete Molecule       | Seesaw               | 4 | Chelate           | N-Donor  |         |
| 182 | FULCAQ   | 201 | Dimer Through Anion     | D-Tetrahedral (Py)   | 4 | Non-Chelate       | Se-Donor |         |
| 183 | FUZLIW   | 202 | Discrete Molecule       | Seesaw               | 4 | Non-Chelate       | C-Donor  | O-Donor |
| 184 | GAHPIR   | 203 | Dimer Through Ligand    | T-Shape              | 5 | Chelate           | N-Donor  |         |
| 185 | GASTAV   | 204 | Discrete Molecule       | Seesaw               | 4 | Non-Chelate       | Se-Donor |         |
| 186 | GEHXIC   | 205 | Dimer Through Ligand    | Seesaw               | 4 | Chelate           | N-Donor  |         |
| 187 | GEHXOI   | 206 | Dimer Through Ligand    | Seesaw               | 4 | Chelate           | N-Donor  |         |
| 188 | GEQCIP   | 207 | Polymer Through Ligand  | Seesaw               | 4 | Non-Chelate       | N-Donor  |         |
| 189 | GEQCOV   | 208 | Polymer Through Ligand  | Seesaw               | 4 | Non-Chelate       | N-Donor  |         |
| 190 | GEZKIH   | 209 | Dimer Through Anion     | D-Tetrahedral (Py)   | 4 | Non-Chelate       | C-Donor  |         |
| 191 | GEZKON   | 210 | Polymer Through Anion   | D-Tetrahedral (Py)   | 4 | Non-Chelate       | C-Donor  |         |
| 192 | GICKAG   | 211 | Polymer Through Anion   | Tetrahedral          | 4 | Metal Halide Only | Iodine   |         |
| 193 | GIDFAB   | 212 | Discrete Molecule       | Tetrahedral          | 4 | Metal Halide Only | Iodine   |         |
| 194 | GIRQAB   | 213 | Polymer Through Ligand  | D-Tetrahedral (Py)   | 4 | Non-Chelate       | N-Donor  | S-Donor |
|     |          | 214 | Polymer Through Anion   | Trigonal             | 3 | Metal Halide Only | Iodine   |         |
|     |          | 215 | Polymer Through Anion   | Trigonal Bipyramid   | 5 | Non-Chelate       | S-Donor  |         |
| 195 | GITJAW   | 216 | Dimer Through Anion     | Tetrahedral          | 4 | Metal Halide Only | Iodine   |         |
| 196 | GIZNIN   | 217 | Dimer Through Ligand    | Seesaw               | 4 | Chelate           | N-Donor  |         |
| 197 | GODDUY   | 218 | Dimer Through Anion     | Tetrahedral          | 4 | Metal Halide Only | Iodine   |         |
| 198 | GODFAG   | 219 | Dimer Through Anion     | Tetrahedral          | 4 | Metal Halide Only | Iodine   |         |
| 199 | GOFKIW   | 220 | Dimer Through Anion     | Tetrahedral          | 4 | Metal Halide Only | Iodine   |         |
| 200 | GOGHEQ   | 221 | Discrete Molecule       | Seesaw               | 4 | Chelate           | N-Donor  |         |
| 201 | GOGHUH   | 222 | Dimer Through Anion     | T-Shape              | 3 | Non-Chelate       | C-Donor  |         |
| 202 | GOHZOS   | 223 | Dimer Through Ligand    | Seesaw               | 4 | Non-Chelate       | N-Donor  | S-Donor |

|     |          |     |                         |                      |   |                   |         |          |            |
|-----|----------|-----|-------------------------|----------------------|---|-------------------|---------|----------|------------|
| 203 | GUBBEK   | 224 | Discrete Molecule       | Trigonal             | 3 | Metal Halide Only |         | Iodine   |            |
|     |          | 225 | Dimer Through Anion     | Tetrahedral          | 4 | Metal Halide Only |         | Iodine   |            |
| 204 | GUGVEJ   | 226 | Dimer Through Anion     | D-Tetrahedral (Py)   | 4 | Non-Chelate       |         | Chlorine |            |
| 205 | GULKUU   | 227 | Discrete Molecule       | Seesaw               | 4 | Non-Chelate       |         | Se-Donor |            |
| 206 | GUTLOX   | 228 | Dimer Through Anion     | D-Tetrahedral (Py)   | 4 | Non-Chelate       |         | S-Donor  |            |
| 207 | GUTLUD   | 229 | Discrete Molecule       | Seesaw               | 4 | Non-Chelate       | S-Donor | N-Donor  |            |
| 208 | GUVGAG   | 230 | Polymer Through Ligand  | Seesaw               | 4 | Non-Chelate       |         | Se-Donor |            |
| 209 | HAGZAR   | 231 | Dimer Through Anion     | D-Tetrahedral (Py)   | 4 | Non-Chelate       |         | P-Donor  |            |
| 210 | HAVCIS   | 232 | Discrete Molecule       | T-Shape              | 5 | Chelate           | O-Donor | N-Donor  |            |
| 211 | HEDTUF   | 233 | Discrete Molecule       | Seesaw               | 4 | Non-Chelate       |         | N-Donor  |            |
| 212 | HEFZIC   | 234 | Dimer Through Anion     | Tetrahedral          | 4 | Metal Halide Only |         | Iodine   |            |
| 213 | HGITUR   | 235 | Discrete Molecule       | Seesaw               | 4 | Non-Chelate       |         | S-Donor  |            |
| 214 | HGTXZO   | 236 | Discrete Molecule       | Hexagonal Bipyramid  | 8 | Chelate           | N-Donor | O-Donor  |            |
| 215 | HIGRAS   | 237 | Polymer Through Anion   | Square Planar        | 4 | Metal Halide Only |         | Iodine   |            |
| 216 | HIPTUV   | 238 | Trimer Through Anion    | D-Tetrahedral (Py)   | 4 | Non-Chelate       |         | C-Donor  |            |
|     |          | 239 | Trimer Through Anion    | Tetrahedral          | 4 | Non-Chelate       |         | C-Donor  |            |
| 217 | HIRTOR   | 240 | Dimer Through Anion     | D-Tetrahedral (Py)   | 4 | Non-Chelate       |         | N-Donor  |            |
| 218 | HIRTUX   | 241 | Dimer Through Anion     | D-Tetrahedral (Py)   | 4 | Non-Chelate       |         | N-Donor  |            |
| 219 | HIRVAF   | 242 | Dimer Through Anion     | D-Tetrahedral (Py)   | 4 | Non-Chelate       |         | N-Donor  |            |
| 220 | HIYMAE   | 243 | Discrete Molecule       | D-Tetrahedral (Py)   | 4 | Non-Chelate       |         | N-Donor  |            |
| 221 | HIYMEI   | 244 | Polymer Through Ligand  | Seesaw               | 4 | Non-Chelate       |         | N-Donor  |            |
| 222 | HIYMIM   | 245 | Polymer Through Ligand  | D-Trigonal Bipyramid | 5 | Non-Chelate       |         | N-Donor  |            |
|     |          | 246 | Polymer Through Anion   | D-Trigonal Bipyramid | 5 | Non-Chelate       |         | N-Donor  |            |
| 223 | HIYMOS   | 247 | Polymer Through Ligand  | D-Trigonal Bipyramid | 5 | Non-Chelate       |         | N-Donor  |            |
|     |          | 248 | Polymer Through Anion   | D-Trigonal Bipyramid | 5 | Non-Chelate       |         | N-Donor  |            |
| 224 | HOKTOR   | 249 | Dimer Through Anion     | D-Tetrahedral (Py)   | 4 | Non-Chelate       |         | N-Donor  |            |
| 225 | HOLHOH   | 250 | Discrete Molecule       | T-Shape              | 5 | Chelate           | N-Donor |          |            |
| 226 | HOLHUN   | 251 | Discrete Molecule       | T-Shape              | 5 | Chelate           | N-Donor |          |            |
| 227 | HOSPAI   | 252 | Discrete Molecule       | T-Shape              | 5 | Chelate           | O-Donor | N-Donor  |            |
| 228 | HOSPEM   | 253 | Discrete Molecule       | T-Shape              | 5 | Chelate           | O-Donor | N-Donor  |            |
| 229 | HOSPIQ   | 254 | Polymer Through Ligand  | T-Shape              | 5 | Chelate           | O-Donor | N-Donor  |            |
|     |          | 255 | Polymer Through Ligand  | D-Tetrahedral (Py)   | 4 | Non-Chelate       |         | N-Donor  |            |
| 230 | HOSPOW   | 256 | Tetramer Through Ligand | T-Shape              | 5 | Chelate           | O-Donor | N-Donor  |            |
|     |          | 257 | Tetramer Through Anion  | D-Tetrahedral (Py)   | 4 | Non-Chelate       |         | N-Donor  |            |
| 231 | HOTBOJ   | 258 | Polymer Through Anion   | D-Tetrahedral (Py)   | 4 | Non-Chelate       |         | N-Donor  |            |
|     |          | 259 | Polymer Through Anion   | Linear               | 2 | Metal Halide Only |         | Iodine   |            |
| 232 | HOTCEA   | 260 | Discrete Molecule       | T-Shape              | 3 | Non-Chelate       |         | N-Donor  |            |
| 233 | HOYMEP   | 261 | Polymer Through Anion   | D-Tetrahedral (Py)   | 4 | Non-Chelate       |         | N-Donor  |            |
| 234 | HOYMIT   | 262 | Polymer Through Anion   | D-Tetrahedral (Py)   | 4 | Non-Chelate       |         | N-Donor  |            |
| 235 | HOYMOZ   | 263 | Polymer Through Anion   | D-Tetrahedral (Py)   | 4 | Non-Chelate       |         | N-Donor  |            |
| 236 | HOYMUJ   | 264 | Polymer Through Anion   | D-Tetrahedral (Py)   | 4 | Non-Chelate       |         | N-Donor  |            |
| 237 | HUBCAK   | 265 | Polymer Through Ligand  | Seesaw               | 4 | Non-Chelate       |         | N-Donor  |            |
| 238 | HUBMEY   | 266 | Discrete Molecule       | T-Shape              | 5 | Chelate           | N-Donor | O-Donor  |            |
| 239 | HUBMIC   | 267 | Discrete Molecule       | Seesaw               | 4 | Non-Chelate       |         | N-donor  |            |
| 240 | HUCHET   | 268 | Dimer Through Anion     | D-Tetrahedral (Py)   | 4 | Non-Chelate       |         | S-Donor  |            |
| 241 | HUCZIQ   | 269 | Dimer Through Anion     | Anti-Prism           | 6 | Non-Chelate       | M-M     | C-Donor  | Molybdenum |
| 242 | HUSNUG   | 270 | Polymer Through Anion   | Seesaw               | 4 | Non-Chelate       |         | N-Donor  |            |
| 243 | IBAF0I   | 271 | Dimer Through Anion     | D-Tetrahedral (Py)   | 4 | Non-Chelate       |         | C-Donor  |            |
| 244 | IBZTHG   | 272 | Polymer Through Ligand  | Seesaw               | 4 | Non-Chelate       |         | N-Donor  |            |
| 245 | ICEQUE   | 273 | Polymer Through Ligand  | Seesaw               | 4 | Non-Chelate       |         | N-Donor  |            |
| 246 | IDANAE   | 274 | Dimer Through Anion     | Tetrahedral          | 4 | Metal Halide Only |         | Iodine   |            |
| 247 | IETHSH   | 275 | Discrete Molecule       | Seesaw               | 4 | Chelate           |         | S-Donor  |            |
| 248 | IETHSH01 | 276 | Discrete Molecule       | Seesaw               | 4 | Chelate           |         | S-Donor  |            |
| 249 | IGENAK   | 277 | Polymer Through Ligand  | Seesaw               | 4 | Non-Chelate       |         | N-Donor  |            |
| 250 | IHGTUR   | 278 | Discrete Molecule       | Seesaw               | 4 | Non-Chelate       |         | S-Donor  |            |
| 251 | IMTSHG   | 279 | Discrete Molecule       | Seesaw               | 4 | Non-Chelate       |         | S-Donor  |            |
| 252 | INOZIU   | 280 | Polymer Through Ligand  | Seesaw               | 4 | Non-Chelate       |         | N-Donor  |            |
| 253 | INOZOA   | 281 | Polymer Through Ligand  | Seesaw               | 4 | Non-Chelate       |         | N-Donor  |            |
| 254 | IPESHG   | 282 | Discrete Molecule       | Seesaw               | 4 | Chelate           | P-Donor |          |            |
| 255 | IQJEY    | 283 | Dimer Through Anion     | Seesaw               | 4 | Non-Chelate       |         | N-Donor  |            |
| 256 | IQOGOK   | 284 | Discrete Molecule       | Seesaw               | 4 | Non-Chelate       |         | S-Donor  |            |
| 257 | IQUJUJ   | 285 | Discrete Molecule       | T-Shape              | 5 | Chelate           | M-M     | O-Donor  | Zinc       |
| 258 | IROMIL   | 286 | Discrete Molecule       | Seesaw               | 4 | Non-Chelate       |         | S-Donor  |            |

|     |          |     |                         |                      |   |                   |             |         |
|-----|----------|-----|-------------------------|----------------------|---|-------------------|-------------|---------|
| 259 | ISAVAA   | 287 | Polymer Through Ligand  | Seesaw               | 4 | Non-Chelate       | N-Donor     |         |
| 260 | ISERUU   | 288 | Discrete Molecule       | T-Shape              | 5 | Non-Chelate       | O-Donor     |         |
| 261 | ISOKIL   | 289 | Discrete Molecule       | D-Trigonal Bipyramid | 5 | Non-Chelate       | O-Donor     | C-Donor |
| 262 | ISOKOR   | 290 | Discrete Molecule       | Tetrahedral          | 4 | Metal Halide Only | Iodine      |         |
| 263 | ISOKUX   | 291 | Dimer Through Anion     | Tetrahedral          | 4 | Metal Halide Only | Iodine      |         |
| 264 | ISOLAE   | 292 | Discrete Molecule       | D-Tetrahedral (Py)   | 4 | Non-Chelate       | O-Donor     |         |
| 265 | ISOLEI   | 293 | Dimer Through Anion     | Anti-Prism           | 6 | Non-Chelate       | O-Donor     | C-Donor |
|     |          | 294 | Dimer Through Anion     | Tetrahedral          | 4 | Metal Halide Only | Iodine      |         |
| 266 | IWEVIP   | 295 | Dimer Through Ligand    | Seesaw               | 4 | Non-Chelate       | N-Donor     |         |
| 267 | IZIRIS   | 296 | Polymer Through Ligand  | Seesaw               | 4 | Non-Chelate       | N-Donor     |         |
| 268 | JADLAB10 | 297 | Dimer Through Anion     | Seesaw               | 4 | Non-Chelate       | P-Donor     |         |
|     |          | 298 | Dimer Through Anion     | Tetrahedral          | 4 | Non-Chelate       | P-Donor     |         |
| 269 | JAHCOK   | 299 | Dimer Through Anion     | D-Tetrahedral (Py)   | 4 | Non-Chelate       | P-Donor     |         |
| 270 | JAHCOK01 | 300 | Dimer Through Anion     | D-Tetrahedral (Py)   | 4 | Non-Chelate       | P-donor     |         |
| 271 | JAHCOK02 | 301 | Dimer Through Anion     | D-Tetrahedral (Py)   | 4 | Non-Chelate       | P-donor     |         |
| 272 | JAPHAK   | 302 | Polymer Through Ligand  | Seesaw               | 4 | Non-Chelate       | N-donor     |         |
| 273 | JAPHEO   | 303 | Dimer Through Ligand    | Seesaw               | 4 | Non-Chelate       | N-Donor     |         |
| 274 | JAPJIU   | 304 | Polymer Through Ligand  | Seesaw               | 4 | Non-Chelate       | N-Donor     |         |
| 275 | JAPJOA   | 305 | Polymer Through Ligand  | Seesaw               | 4 | Non-Chelate       | N-Donor     |         |
| 276 | JAPKIV   | 306 | Dimer Through Ligand    | Seesaw               | 4 | Non-Chelate       | N-Donor     |         |
| 277 | JAPKOB   | 307 | Polymer Through Ligand  | Seesaw               | 4 | Non-Chelate       | N-Donor     |         |
| 278 | JARCAH   | 308 | Dimer Through Anion     | Tetrahedral          | 4 | Metal Halide Only | Iodine      |         |
|     |          | 309 | Discrete Molecule       | Linear               | 2 | Metal Halide Only | Iodine      |         |
| 279 | JATVEF   | 310 | Dimer Through Anion     | Tetrahedral          | 4 | Metal Halide Only | Iodine      |         |
| 280 | JETKEY   | 311 | Dimer Through Ligand    | Tetrahedral          | 4 | Metal Halide Only | Iodine      |         |
| 281 | JEWGUN   | 312 | Dimer Through Anion     | D-Trigonal Bipyramid | 5 | Metal Halide Only | Iodine      |         |
|     |          | 313 | Discrete Molecule       | Trigonal Pyramid     | 3 | Non-Chelate       | O-Donor     |         |
| 282 | JIBHOR   | 314 | Dimer Through Anion     | Tetrahedral          | 4 | Metal Halide Only | Iodine      |         |
|     |          | 315 | Discrete Molecule       | Linear               | 2 | Metal Halide Only | Iodine      |         |
| 283 | JIBHOR01 | 316 | Dimer Through Anion     | Tetrahedral          | 4 | Metal Halide Only | Iodine      |         |
|     |          | 317 | Discrete Molecule       | Linear               | 2 | Metal Halide Only | Iodine      |         |
| 284 | JIFNOB   | 318 | Polymer Through Anion   | D-Tetrahedral (Py)   | 4 | Non-Chelate       | N-Donor     |         |
| 285 | JIGXEC   | 319 | Discrete Molecule       | Seesaw               | 4 | Metal Halide Only | Iodine      |         |
| 286 | JINZAH   | 320 | Polymer Through Anion   | D-Octahedral         | 6 | Non-Chelate       | P-Donor     |         |
|     |          | 321 | Polymer Through Anion   | Tetrahedral          | 4 | Non-Chelate       | P-Donor     |         |
| 287 | JIQYEO   | 322 | Polymer Through Ligand  | Seesaw               | 4 | Non-Chelate       | N-Donor     |         |
| 288 | JIQYEO01 | 323 | Polymer Through Ligand  | Seesaw               | 4 | Non-Chelate       | N-Donor     |         |
| 289 | JIQYIS   | 324 | Polymer Through Ligand  | Seesaw               | 4 | Non-Chelate       | N-Donor     |         |
| 290 | JIQYIS01 | 325 | Polymer Through Ligand  | Seesaw               | 4 | Non-Chelate       | N-Donor     |         |
| 291 | JOKHEW   | 326 | Polymer Through Ligand  | Tetrahedral          | 4 | Metal Halide Only | Iodine      |         |
| 292 | JOKHIA   | 327 | Discrete Molecule       | Tetrahedral          | 4 | Metal Halide Only | Iodine      |         |
| 293 | JOKHIA01 | 328 | Discrete Molecule       | Tetrahedral          | 4 | Metal Halide Only | Iodine      |         |
| 294 | JOMJOK   | 329 | Tetramer Through Ligand | Seesaw               | 4 | Non-Chelate       | C-Donor     |         |
|     |          | 330 | Tetramer Through Ligand | T-Shape              | 3 | Non-Chelate       | C-Donor     |         |
| 295 | JOMJOK10 | 331 | Tetramer Through Ligand | Seesaw               | 4 | Non-Chelate       | C-Donor     |         |
|     |          | 332 | Tetramer Through Ligand | T-Shape              | 3 | Non-Chelate       | C-Donor     |         |
| 296 | JOMVEO   | 333 | Dimer Through Anion     | D-Tetrahedral (Py)   | 4 | Non-Chelate       | C-Donor     |         |
| 297 | JOTJIL   | 334 | Dimer Through Anion     | Tetrahedral          | 4 | Metal Halide Only | Iodine      |         |
| 298 | JOVKOU   | 335 | Dimer Through Anion     | Tetrahedral          | 4 | Metal Halide Only | Iodine      |         |
| 299 | JULSAM   | 336 | Discrete Molecule       | Tetrahedral          | 4 | Metal Halide Only | Iodine      |         |
| 300 | KANLES   | 337 | Dimer Through Ligand    | Seesaw               | 4 | Non-Chelate       | N-Donor     |         |
| 301 | KEJVOK   | 338 | Discrete Molecule       | Seesaw               | 4 | Non-Chelate       | P-Donor     | S-Donor |
| 302 | KEMVAA   | 339 | Polymer Through Anion   | Tetrahedral          | 4 | Metal Halide Only | Iodine      |         |
| 303 | KEMVEE   | 340 | Tetramer Through Anion  | Tetrahedral          | 4 | Metal Halide Only | Iodine      |         |
| 304 | KERYOX   | 341 | Discrete Molecule       | Seesaw               | 4 | Non-Chelate       | N-Donor     |         |
| 305 | KEZBOH   | 342 | Dimer Through Anion     | Tetrahedral          | 4 | Metal Halide Only | Iodine      |         |
| 306 | KIQKUS   | 343 | Discrete Molecule       | Seesaw               | 4 | Non-Chelate       | N-Donor     |         |
| 307 | KOBVUT   | 344 | Dimer Through Anion     | D-Tetrahedral (Py)   | 4 | Non-Chelate       | C-Donor     |         |
| 308 | KOBWAA   | 345 | Discrete Molecule       | Seesaw               | 4 | Non-Chelate       | C-Donor     | O-Donor |
| 309 | KOBWEE   | 346 | Dimer Through Anion     | D-Tetrahedral (Py)   | 4 | Non-Chelate       | C-Donor     |         |
| 310 | KOFXAE   | 347 | Discrete Molecule       | Trigonal             | 3 | M-M               | Non-Chelate | Iron    |
| 311 | KOPPIO   | 348 | Dimer Through Anion     | D-Tetrahedral (Py)   | 4 | M-M               | Non-Chelate | Nickel  |
| 312 | KOXROG   | 349 | Discrete Molecule       | Seesaw               | 4 | Non-Chelate       | S-Donor     |         |

|     |          |     |                        |                    |   |                   |          |          |
|-----|----------|-----|------------------------|--------------------|---|-------------------|----------|----------|
| 313 | KUCWOW   | 350 | Discrete Molecule      | Seesaw             | 4 | Chelate           | N-Donor  |          |
| 314 | KUJWET   | 351 | Discrete Molecule      | Seesaw             | 6 | Chelate           | N-Donor  |          |
| 315 | KUJXAQ   | 352 | Dimer Through Ligand   | Seesaw             | 4 | Chelate           | N-Donor  |          |
| 316 | KULPIR   | 353 | Dimer Through Anion    | Tetrahedral        | 4 | Metal Halide Only | Iodine   |          |
| 317 | KUNNIS   | 354 | Dimer Through Ligand   | Seesaw             | 4 | Non-Chelate       | N-Donor  |          |
| 318 | KUNNIS01 | 355 | Dimer Through Ligand   | Seesaw             | 4 | Non-Chelate       | N-Donor  |          |
| 319 | LACDAW   | 356 | Dimer Through Ligand   | Seesaw             | 4 | Non-Chelate       | N-Donor  |          |
| 320 | LACTOA   | 357 | Polymer Through Ligand | D-Tetrahedral (Py) | 4 | Non-Chelate       | N-Donor  |          |
| 321 | LADJIL   | 358 | Discrete Molecule      | Seesaw             | 4 | Chelate           | P-Donor  | C-Donor  |
| 322 | LAMVEC   | 359 | Polymer Through Ligand | Seesaw             | 4 | Non-Chelate       | N-Donor  |          |
| 323 | LAQGIT   | 360 | Discrete Molecule      | Trigonal           | 3 | Non-Chelate       | S-Donor  |          |
| 324 | LARLIB   | 361 | Polymer Through Ligand | Seesaw             | 4 | Non-Chelate       | N-Donor  |          |
| 325 | LARLOH   | 362 | Trimer Through Ligand  | Seesaw             | 4 | Non-Chelate       | N-Donor  |          |
| 326 | LECEDD   | 363 | Discrete Molecule      | Tetrahedral        | 4 | Non-Chelate       | Iodine   |          |
| 327 | LEHGAI   | 364 | Discrete Molecule      | T-Shape            | 5 | Non-Chelate       | O-Donor  | N-Donor  |
| 328 | LEHZIJ   | 365 | Polymer Through Ligand | Seesaw             | 4 | Non-Chelate       | N-Donor  |          |
| 329 | LEKSAX   | 366 | Discrete Molecule      | Seesaw             | 4 | Chelate           | N-Donor  |          |
| 330 | LEKTEC   | 367 | Discrete Molecule      | Seesaw             | 4 | Chelate           | N-Donor  |          |
| 331 | LEQLAW   | 368 | Polymer Through Ligand | seesaw             | 4 | Non-Chelate       | N-Donor  |          |
| 332 | LEQLEA   | 369 | Dimer Through Anion    | Seesaw             | 4 | Metal Halide Only | Chlorine |          |
| 333 | LEQPII   | 370 | Discrete Molecule      | Seesaw             | 4 | Non-Chelate       | N-Donor  | Chlorine |
| 334 | LEQRAB   | 371 | Dimer Through Ligand   | T-Shape            | 3 | Non-Chelate       | N-Donor  |          |
| 335 | LEQSAC   | 372 | Polymer Through Ligand | Seesaw             | 4 | Chelate           | N-Donor  |          |
|     |          | 373 | Polymer Through Anion  | Seesaw             | 4 | Chelate           | N-Donor  |          |
| 336 | LEXBOG   | 374 | Dimer Through Anion    | D-Tetrahedral (Py) | 4 | Non-Chelate       | C-Donor  |          |
| 337 | LIBNOZ   | 375 | Dimer Through Anion    | Tetrahedral        | 4 | Metal Halide Only | Iodine   |          |
| 338 | LIGFEO   | 376 | Discrete Molecule      | Tetrahedral        | 4 | Metal Halide Only | Iodine   |          |
| 339 | LIGFIS   | 377 | Discrete Molecule      | Tetrahedral        | 4 | Metal Halide Only | Iodine   |          |
| 340 | LINYEO   | 378 | Polymer Through Ligand | Seesaw             | 4 | Non-Chelate       | N-Donor  |          |
| 341 | LIVKOS   | 379 | Discrete Molecule      | Seesaw             | 4 | Non-Chelate       | S-Donor  |          |
| 342 | LOLFOI   | 380 | Polymer Through Anion  | Square Pyramid     | 5 | Chelate           | S-Donor  | N-Donor  |
|     |          | 381 | Polymer Through Anion  | Tetrahedral        | 4 | Metal Halide Only | Iodine   |          |
| 343 | LOMPAG   | 382 | Discrete Molecule      | T-Shape            | 3 | Non-Chelate       | N-Donor  |          |
| 344 | LOMPEK   | 383 | Discrete Molecule      | Seesaw             | 4 | Non-Chelate       | N-Donor  |          |
| 345 | LOWKAL   | 384 | Discrete Molecule      | Tetrahedral        | 4 | Metal Halide Only | Iodine   |          |
| 346 | LOWKOZ   | 385 | Dimer Through Anion    | Tetrahedral        | 4 | Metal Halide Only | Iodine   |          |
| 347 | LUHDOJ   | 386 | Dimer Through Anion    | Tetrahedral        | 4 | Metal Halide Only | Iodine   |          |
| 348 | LUTWON   | 387 | Polymer Through Anion  | Square Planar      | 4 | Non-Chelate       | O-Donor  |          |
|     |          | 388 | Polymer Through Ligand | Seesaw             | 4 | Non-Chelate       | O-Donor  |          |
| 349 | LUZVOS   | 389 | Polymer Through Anion  | D-Tetrahedral (Py) | 4 | Non-Chelate       | N-Donor  |          |
| 350 | MAJHEM   | 390 | Dimer Through Anion    | T-Shape            | 3 | Metal Halide Only | Iodine   |          |
| 351 | MASYIO   | 391 | Discrete Molecule      | Seesaw             | 4 | Non-Chelate       | S-Donor  |          |
| 352 | MASYIO01 | 392 | Discrete Molecule      | Seesaw             | 4 | Non-Chelate       | S-Donor  |          |
| 353 | MEPFIK   | 393 | Dimer Through Ligand   | Seesaw             | 4 | Non-Chelate       | N-Donor  |          |
| 354 | MESWEM   | 394 | Polymer Through Anion  | Trigonal Bipyramid | 5 | Non-Chelate       | S-Donor  |          |
| 355 | MESWIQ   | 395 | Discrete Molecule      | Seesaw             | 4 | Non-Chelate       | S-Donor  |          |
| 356 | MESZEQ   | 396 | Discrete Molecule      | Seesaw             | 4 | Non-Chelate       | N-Donor  |          |
| 357 | MIHBOV   | 397 | Discrete Molecule      | Tetrahedral        | 4 | Metal Halide Only | Iodine   |          |
| 358 | MIQTEN   | 398 | Polymer Through Ligand | D-Tetrahedral (Py) | 4 | Non-Chelate       | S-Donor  |          |
|     |          | 399 | Polymer Through Anion  | Tetrahedral        | 4 | Non-Chelate       | S-Donor  |          |
| 359 | MIYSIX   | 400 | Polymer Through Ligand | Seesaw             | 4 | Non-Chelate       | N-Donor  |          |
| 360 | MOLWAL   | 401 | Polymer Through Anion  | Tetrahedral        | 4 | Metal Halide Only | Iodine   |          |
| 361 | MOVDIM   | 402 | Discrete Molecule      | Seesaw             | 4 | Non-Chelate       | S-Donor  |          |
| 362 | MOWGAH   | 403 | Dimer Through Ligand   | T-Shape            | 3 | Non-Chelate       | N-Donor  |          |
| 363 | NABJAC   | 404 | Dimer Through Anion    | Tetrahedral        | 4 | Metal Halide Only | Iodine   |          |
| 364 | NABJEG   | 405 | Dimer Through Anion    | Tetrahedral        | 4 | Metal Halide Only | Iodine   |          |
| 365 | NAZMAE   | 406 | Dimer Through Anion    | D-Tetrahedral (Py) | 4 | Non-Chelate       | N-Donor  |          |
| 366 | NAZRAJ   | 407 | Polymer Through Ligand | Seesaw             | 4 | Non-Chelate       | N-Donor  |          |
| 367 | NEBZAV   | 408 | Dimer Through Anion    | D-Tetrahedral (Py) | 4 | M-M   Non-Chelate | Platinum |          |
| 368 | NEFLAL   | 409 | Dimer Through Ligand   | T-Shape            | 5 | Chelate           | O-Donor  |          |
| 369 | NEJKEF   | 410 | Dimer Through Anion    | Tetrahedral        | 4 | Metal Halide Only | Iodine   |          |
| 370 | NEJJIJ   | 411 | Dimer Through Anion    | Tetrahedral        | 4 | Metal Halide Only | Iodine   |          |
| 371 | NEPGAR   | 412 | Dimer Through Ligand   | Seesaw             | 4 | Chelate           | N-donor  |          |



|     |          |     |                        |                     |   |                   |                     |
|-----|----------|-----|------------------------|---------------------|---|-------------------|---------------------|
| 372 | NETHEA   | 413 | Polymer Through Ligand | Seesaw              | 4 | Non-Chelate       | N-donor             |
| 373 | NEZDUR   | 414 | Dimer Through Anion    | Tetrahedral         | 4 | Metal Halide Only | Iodine              |
| 374 | NIKBUF   | 415 | Polymer Through Anion  | D-Tetrahedral (Py)  | 4 | Non-Chelate       | N-donor             |
| 375 | NIMBES   | 416 | Polymer Through Ligand | D-Tetrahedral (Py)  | 4 | Non-Chelate       | S-donor             |
|     |          | 417 | Polymer Through Anion  | D-Tetrahedral (Py)  | 4 | Non-Chelate       | S-donor             |
| 376 | NIVBEZ   | 418 | Discrete Molecule      | Prism               | 6 | Chelate   M-M     | N-Donor   Iron      |
| 377 | NOHZAM   | 419 | Discrete Molecule      | Seesaw              | 4 | Chelate           | N-donor             |
| 378 | NOMSEO   | 420 | Discrete Molecule      | T-Shape             | 5 | Chelate   M-M     | Chlorine   Platinum |
| 379 | NOMSIS   | 421 | Dimer Through Anion    | D-Tetrahedral (Py)  | 4 | Chelate           | Chlorine            |
| 380 | NOQVIY   | 422 | Discrete Molecule      | Seesaw              | 4 | Non-Chelate       | S-donor             |
| 381 | NUBBOX   | 423 | Trimer Through Anion   | Tetrahedral         | 4 | Metal Halide Only | Iodine              |
|     |          | 424 | Trimer Through Anion   | T-Shape             | 3 | Metal Halide Only | Iodine              |
| 382 | NUXGAP   | 425 | Discrete Molecule      | Seesaw              | 4 | Non-Chelate       | P-donor             |
| 383 | NUXWOT   | 426 | Dimer Through Ligand   | Seesaw              | 4 | Non-Chelate       | S-donor             |
| 384 | OBAPUE   | 427 | Dimer Through Ligand   | Seesaw              | 4 | Non-Chelate       | S-donor             |
| 385 | OBAQEP   | 428 | Dimer Through Anion    | Tetrahedral         | 4 | Non-Chelate       | S-donor             |
|     |          | 429 | Dimer Through Anion    | D-Tetrahedral (Py)  | 4 | Non-Chelate       | S-donor             |
| 386 | OBATIU   | 430 | Dimer Through Anion    | Tetrahedral         | 4 | Metal Halide Only | Iodine              |
| 387 | OBATOA   | 431 | Dimer Through Anion    | Tetrahedral         | 4 | Metal Halide Only | Iodine              |
| 388 | OBOZUA   | 432 | Polymer Through Ligand | Seesaw              | 4 | Non-Chelate       | N-donor             |
| 389 | OBUCEU   | 433 | Dimer Through Anion    | D-Tetrahedral (Py)  | 4 | Non-Chelate       | S-donor             |
| 390 | OBUMAA   | 434 | Discrete Molecule      | Seesaw              | 4 | Non-Chelate       | S-Donor             |
| 391 | ODISEA   | 435 | Polymer Through Ligand | Seesaw              | 4 | Non-Chelate       | N-Donor             |
| 392 | ODISOK   | 436 | polymer through ligand | seesaw              | 4 | Non-Chelate       | n-donor             |
| 393 | ODISUQ   | 437 | Polymer Through Ligand | seesaw              | 4 | Non-Chelate       | N-Donor             |
| 394 | ODITAX   | 438 | Polymer Through Ligand | Seesaw              | 4 | Non-Chelate       | N-Donor             |
| 395 | OFOROR   | 439 | Discrete Molecule      | Seesaw              | 4 | Non-Chelate       | N-Donor             |
| 396 | OFORUY   | 440 | Tetramer Through Anion | Seesaw              | 4 | Non-Chelate       | Se-Donor            |
| 397 | OHUTAM   | 441 | Discrete Molecule      | Seesaw              | 4 | Chelate           | N-Donor             |
| 398 | OJEPIE   | 442 | Polymer Through Anion  | Seesaw              | 4 | Non-Chelate       | S-Donor             |
|     |          | 443 | Polymer Through Anion  | D-Octahedral        | 6 | Non-Chelate       | S-Donor             |
| 399 | OLAFOY   | 444 | Discrete Molecule      | Tetrahedral         | 4 | Metal Halide Only | Iodine              |
| 400 | OLAFUE   | 445 | Discrete Molecule      | Tetrahedral         | 4 | Metal Halide Only | Iodine              |
| 401 | OMUVEY   | 446 | Discrete Molecule      | T-Shape             | 5 | Chelate           | N-Donor             |
| 402 | ONEZEO   | 447 | Discrete Molecule      | Seesaw              | 4 | Non-Chelate       | N-Donor             |
| 403 | ONIHUQ   | 448 | Polymer Through Anion  | D-Tetrahedral (Py)  | 4 | Non-Chelate       | N-Donor             |
| 404 | ONINOQ   | 449 | Polymer Through Anion  | D-Tetrahedral (Py)  | 4 | Non-Chelate       | N-Donor             |
| 405 | ONOZAU   | 450 | Discrete Molecule      | Seesaw              | 4 | Non-Chelate       | Se-Donor            |
| 406 | ONOZAU01 | 451 | Discrete Molecule      | Seesaw              | 4 | Non-Chelate       | Se-Donor            |
| 407 | OQALOI   | 452 | Polymer Through Anion  | D-Tetrahedral (Py)  | 4 | Non-Chelate       | N-Donor             |
|     |          | 453 | Polymer Through Ligand | D-Tetrahedral (Py)  | 4 | Non-Chelate       | N-Donor             |
| 408 | OQALUO   | 454 | Tetramer Through Anion | Seesaw              | 4 | Non-Chelate       | N-Donor             |
|     |          | 455 | Tetramer Through Anion | D-Tetrahedral (Py)  | 4 | Non-Chelate       | N-Donor             |
| 409 | OQAMAV   | 456 | Trimer Through Anion   | Tetrahedral         | 4 | Non-Chelate       | N-Donor             |
|     |          | 457 | Trimer Through Ligand  | D-Tetrahedral (Py)  | 4 | Non-Chelate       | N-Donor             |
| 410 | PAIOHG   | 458 | Dimer Through Anion    | Tetrahedral         | 4 | Metal Halide Only | Iodine              |
| 411 | PEDPOF   | 459 | Dimer Through Ligand   | Seesaw              | 4 | Chelate           | N-Donor             |
| 412 | PEDPOF01 | 460 | Dimer Through Ligand   | Seesaw              | 4 | Chelate           | N-Donor             |
| 413 | PEGXUV   | 461 | Dimer Through Anion    | D-Tetrahedral (Py)  | 4 | Non-Chelate       | S-Donor             |
| 414 | PENNUR   | 462 | Dimer Through Anion    | Tetrahedral         | 4 | Metal Halide Only | Iodine              |
| 415 | PEVYOF   | 463 | Polymer Through Ligand | Seesaw              | 4 | Non-Chelate       | N-Donor             |
| 416 | PEVYUL   | 464 | Polymer Through Ligand | Seesaw              | 4 | Non-Chelate       | N-Donor             |
| 417 | PEXHAC   | 465 | Dimer Through Ligand   | Seesaw              | 4 | Non-Chelate       | N-Donor             |
| 418 | PIFWEI   | 466 | Dimer Through Anion    | Tetrahedral         | 4 | Metal Halide Only | Iodine              |
| 419 | PIJRAB   | 467 | Polymer Through Anion  | Tetrahedral         | 4 | Metal Halide Only | Iodine              |
| 420 | PIJVOU   | 468 | Polymer Through Anion  | D-Tetrahedral (Py)  | 4 | Non-Chelate       | P-Donor             |
| 421 | PIRYUL   | 469 | Trimer Through Anion   | T-Shape             | 3 | Metal Halide Only | Iodine              |
|     |          | 470 | Trimer Through Anion   | Tetrahedral         | 4 | Metal Halide Only | Iodine              |
| 422 | PIZLOB   | 471 | Polymer Through Ligand | Seesaw              | 4 | Non-Chelate       | N-Donor             |
| 423 | PODWEK   | 472 | Discrete Molecule      | T-Shape             | 5 | Chelate           | N-Donor             |
| 424 | POHXUF   | 473 | Discrete Molecule      | Seesaw              | 4 | Non-Chelate       | S-Donor             |
| 425 | POLKUW   | 474 | Discrete Molecule      | Hexagonal Bipyramid | 8 | Non-Chelate       | O-Donor             |
| 426 | PORMAL   | 475 | Dimer Through Ligand   | Seesaw              | 4 | Non-Chelate       | P-Donor   C-Donor   |

|     |          |     |                        |                      |   |                   |                   |
|-----|----------|-----|------------------------|----------------------|---|-------------------|-------------------|
| 427 | POTPAP   | 476 | Dimer Through Anion    | D-Tetrahedral (Py)   | 4 | Non-Chelate       | C-Donor           |
| 428 | PPENHG   | 477 | Polymer Through Ligand | Seesaw               | 4 | Non-Chelate       | P-Donor           |
| 429 | PUFBOI   | 478 | Trimer Through Anion   | T-Shape              | 3 | Non-Chelate       | C-Donor           |
|     |          | 479 | Trimer Through Anion   | Tetrahedral          | 4 | Non-Chelate       | C-Donor           |
| 430 | PUFBUO   | 480 | Polymer Through Anion  | Square Pyramid       | 5 | Non-Chelate       | C-Donor           |
|     |          | 481 | Polymer Through Anion  | Tetrahedral          | 4 | Non-Chelate       | C-Donor           |
| 431 | PUKLOW   | 482 | Dimer Through Anion    | D-Tetrahedral (Py)   | 4 | Non-Chelate       | S-Donor           |
| 432 | QAHNIX   | 483 | Dimer Through Anion    | Tetrahedral          | 4 | Metal Halide Only | Iodine            |
| 433 | QAMXIL   | 484 | Polymer Through Ligand | Seesaw               | 4 | Non-Chelate       | O-Donor           |
|     |          | 485 | Discrete Molecule      | Linear               | 2 | Metal Halide Only | Iodine            |
| 434 | QAPTIM   | 486 | Discrete Molecule      | T-Shape              | 5 | Chelate           | N-Donor           |
| 435 | QAVFEA   | 487 | Polymer Through Ligand | Seesaw               | 4 | Non-Chelate       | N-Donor           |
| 436 | QAVFEA01 | 488 | Polymer Through Ligand | Seesaw               | 4 | Non-Chelate       | N-Donor           |
| 437 | QEVMEK   | 489 | Tetramer Through Anion | Tetrahedral          | 4 | Metal Halide Only |                   |
| 438 | QEZQET   | 490 | Dimer Through Anion    | D-Tetrahedral (Py)   | 4 | Non-Chelate       | N-Donor           |
| 439 | QEZQIX   | 491 | Polymer Through Anion  | Square Pyramid       | 5 | Non-Chelate       | N-Donor           |
| 440 | QEZQOD   | 492 | Polymer Through Anion  | Square Pyramid       | 5 | Non-Chelate       | N-Donor           |
| 441 | QUIXIQ   | 493 | Discrete Molecule      | Trigonal             | 3 | Non-Chelate       | S-Donor           |
| 442 | QUIXIQ01 | 494 | Discrete Molecule      | Trigonal             | 3 | Non-Chelate       | S-Donor           |
| 443 | QIVWIC   | 495 | Discrete Molecule      | Seesaw               | 4 | Chelate           | N-Donor           |
| 444 | QOFQEH   | 496 | Discrete Molecule      | Trigonal             | 3 | Metal Halide Only | Iodine            |
| 445 | QOKXUJ   | 497 | Polymer Through Anion  | D-Tetrahedral (Py)   | 4 | Non-Chelate       | S-Donor           |
| 446 | QOTLOB   | 498 | Discrete Molecule      | Tetrahedral          | 4 | Metal Halide Only | Iodine            |
| 447 | QUMRIB   | 499 | Tetramer Through Anion | Seesaw               | 4 | Chelate           | N-Donor           |
|     |          | 500 | Tetramer Through Anion | Trigonal Bipyramid   | 5 | Metal Halide Only | Iodine            |
| 448 | QUMSUM   | 501 | Dimer Through Anion    | D-Tetrahedral (Py)   | 4 | Non-Chelate       | O-Donor           |
| 449 | QUVWUB   | 502 | Dimer Through Anion    | D-Tetrahedral (Py)   | 4 | Non-Chelate       | N-Donor           |
| 450 | QUVXAI   | 503 | Dimer Through Anion    | D-Tetrahedral (Py)   | 4 | Non-Chelate       | N-Donor           |
| 451 | QUZFEY   | 504 | Polymer Through Anion  | D-Tetrahedral (Py)   | 4 | Non-Chelate       | N-Donor           |
|     |          | 505 | Polymer Through Ligand | D-Tetrahedral (Py)   | 4 | Non-Chelate       | N-Donor           |
| 452 | RACXID   | 506 | Tetramer Through Anion | Tetrahedral          | 4 | Metal Halide Only | Iodine            |
| 453 | RAHDIP   | 507 | Polymer Through Anion  | Tetrahedral          | 4 | Metal Halide Only | Iodine            |
| 454 | RAHDOV   | 508 | Dimer Through Anion    | Tetrahedral          | 4 | Metal Halide Only | Iodine            |
| 455 | RAHDUB   | 509 | Dimer Through Anion    | Tetrahedral          | 4 | Metal Halide Only | Iodine            |
| 456 | RAHPIB   | 510 | Dimer Through Anion    | Tetrahedral          | 4 | Metal Halide Only | Iodine            |
| 457 | RAJJET   | 511 | Tetramer Through Anion | D-Square Pyramid     | 5 | Non-Chelate       | O-Donor   N-Donor |
|     |          | 512 | Tetramer Through Anion | Tetrahedral          | 4 | Metal Halide Only | Iodine            |
| 458 | RAMJIZ   | 513 | Polymer Through Ligand | Seesaw               | 4 | Non-Chelate       | N-Donor           |
| 459 | RAMSON   | 514 | Polymer Through Ligand | Seesaw               | 4 | Non-Chelate       | N-Donor           |
| 460 | RAWTEP   | 515 | Dimer Through Ligand   | Seesaw               | 4 | Non-Chelate       | N-Donor           |
| 461 | REGVUV   | 516 | Tetramer Through Anion | Seesaw               | 4 | Metal Halide Only | Iodine            |
|     |          | 517 | Tetramer Through Anion | Tetrahedral          | 4 | Metal Halide Only | Iodine            |
| 462 | RESHUT   | 518 | Polymer Through Anion  | D-Tetrahedral (Py)   | 4 | Non-Chelate       | N-Donor           |
|     |          | 519 | Polymer Through Ligand | Seesaw               | 4 | Non-Chelate       | N-Donor           |
| 463 | REZWID   | 520 | Polymer Through Ligand | Seesaw               | 4 | Non-Chelate       | N-Donor           |
| 464 | RIPPIQ   | 521 | Dimer Through Anion    | Tetrahedral          | 4 | Metal Halide Only | Iodine            |
| 465 | RIPPOW   | 522 | Discrete Molecule      | Seesaw               | 4 | Non-Chelate       | C-Donor           |
| 466 | RIZNAP   | 523 | Dimer Through Anion    | Seesaw               | 4 | Non-Chelate       | Se-Donor          |
| 467 | ROBVUA   | 524 | Polymer Through Ligand | Seesaw               | 4 | Non-Chelate       | N-Donor           |
| 468 | ROBWEL   | 525 | Polymer Through Ligand | Seesaw               | 4 | Non-Chelate       | N-Donor           |
| 469 | RODMUT   | 526 | Dimer Through Anion    | Tetrahedral          | 4 | Metal Halide Only | Iodine            |
| 470 | RODNEE   | 527 | Tetramer Through Anion | Tetrahedral          | 4 | Metal Halide Only | Iodine            |
| 471 | RODVIQ   | 528 | Discrete Molecule      | Seesaw               | 4 | Chelate           | N-Donor           |
| 472 | RUMWIG   | 529 | Polymer Through Ligand | Seesaw               | 4 | Non-Chelate       | N-Donor           |
| 473 | RUQHAM   | 530 | Discrete Molecule      | Seesaw               | 4 | Non-Chelate       | P-Donor           |
| 474 | RUXBUJ   | 531 | Dimer Through Anion    | D-Square Pyramid     | 5 | Chelate           | N-Donor           |
|     |          | 532 | Dimer Through Anion    | Tetrahedral          | 4 | Metal Halide Only | Iodine            |
| 475 | RUYWEP   | 533 | Polymer Through Anion  | D-Trigonal Bipyramid | 5 | Non-Chelate       | N-Donor   O-Donor |
| 476 | RUYWUF   | 534 | Dimer Through Anion    | D-Tetrahedral (Py)   | 4 | Non-Chelate       | N-Donor           |
| 477 | SARBOC   | 535 | Dimer Through Anion    | Tetrahedral          | 4 | Metal Halide Only | Iodine            |
| 478 | SAYQAK   | 536 | Discrete Molecule      | Tetrahedral          | 4 | Metal Halide Only | Iodine            |
| 479 | SCPIHG   | 537 | Dimer Through Anion    | D-Tetrahedral (Py)   | 4 | Non-Chelate       | C-Donor           |
| 480 | SEGRUT   | 538 | Discrete Molecule      | Seesaw               | 4 | Chelate           | N-Donor           |

|     |          |     |                        |                     |   |                   |         |         |         |      |
|-----|----------|-----|------------------------|---------------------|---|-------------------|---------|---------|---------|------|
| 481 | SEGSAA   | 539 | Discrete Molecule      | Seesaw              | 4 | Chelate           | N-Donor |         |         |      |
| 482 | SEGTEE   | 540 | Discrete Molecule      | Tetrahedral         | 4 | Metal Halide Only | Iodine  |         |         |      |
| 483 | SESMUZ   | 541 | Dimer Through Anion    | Tetrahedral         | 4 | Metal Halide Only | Iodine  |         |         |      |
| 484 | SINHOO   | 542 | Polymer Through Ligand | Seesaw              | 4 | Non-Chelate       | N-Donor |         |         |      |
| 485 | SIRYEV   | 543 | Tetramer Through Anion | D-Tetrahedral (Py)  | 4 | Non-Chelate       | S-Donor |         |         |      |
| 486 | SODXOY   | 544 | Discrete Molecule      | Seesaw              | 4 | Chelate           | N-Donor |         |         |      |
| 487 | SUFSAP   | 545 | Discrete Molecule      | Tetrahedral         | 4 | Metal Halide Only | Iodine  |         |         |      |
| 488 | SUVZOZ   | 546 | Polymer Through Ligand | Seesaw              | 4 | Non-Chelate       | N-Donor |         |         |      |
| 489 | TACJUC   | 547 | Polymer Through Ligand | Seesaw              | 4 | Non-Chelate       | N-Donor |         |         |      |
| 490 | TAHLEV   | 548 | Dimer Through Anion    | Tetrahedral         | 4 | Metal Halide Only | Iodine  |         |         |      |
| 491 | TAHLEV01 | 549 | Dimer Through Anion    | Tetrahedral         | 4 | Metal Halide Only | Iodine  |         |         |      |
| 492 | TAJCEN   | 550 | Polymer Through Ligand | Seesaw              | 4 | Non-Chelate       | N-Donor |         |         |      |
| 493 | TAPFUM   | 551 | Dimer Through Ligand   | Seesaw              | 4 | Non-Chelate       | S-Donor | N-Donor |         |      |
| 494 | TAWREP   | 552 | Polymer Through Anion  | D-Tetrahedral (Py)  | 4 | Non-Chelate       | N-Donor |         |         |      |
| 495 | TENDAR   | 553 | Polymer Through Anion  | Tetrahedral         | 4 | Metal Halide Only | Iodine  |         |         |      |
| 496 | TEWZOM   | 554 | Discrete Molecule      | Seesaw              | 4 | Chelate           | N-Donor |         |         |      |
| 497 | TIBCUE   | 555 | Dimer Through Ligand   | Seesaw              | 4 | Chelate           | N-Donor |         |         |      |
| 498 | TIBDAL   | 556 | Dimer Through Ligand   | Seesaw              | 4 | Chelate           | N-Donor |         |         |      |
| 499 | TIMXUJ   | 557 | Polymer Through Anion  | D-Tetrahedral (Py)  | 4 | Non-Chelate       | S-Donor |         |         |      |
| 500 | TINWUI   | 558 | Dimer Through Anion    | D-Pentagonal        | 7 | Chelate           | M-M     | C-Donor | N-Donor | Iron |
|     |          | 559 | Dimer Through Anion    | Tetrahedral         | 4 | Metal Halide Only | Iodine  |         |         |      |
| 501 | TIPZOI   | 560 | Polymer Through Anion  | D-Tetrahedral (Py)  | 4 | Non-Chelate       | N-Donor |         |         |      |
|     |          | 561 | Polymer Through Ligand | Seesaw              | 4 | Non-Chelate       | N-Donor |         |         |      |
| 502 | TIPZUO   | 562 | Polymer Through Anion  | D-Tetrahedral (Py)  | 4 | Non-Chelate       | N-Donor |         |         |      |
|     |          | 563 | Polymer Through Ligand | Seesaw              | 4 | Non-Chelate       | N-Donor |         |         |      |
| 503 | TIZFUE   | 564 | Discrete Molecule      | Seesaw              | 4 | Non-Chelate       | S-Donor |         |         |      |
| 504 | TIZNUN   | 565 | Discrete Molecule      | Linear              | 2 | Metal Halide Only | Iodine  |         |         |      |
| 505 | TMAIHG10 | 566 | Polymer Through Anion  | Tetrahedral         | 4 | Metal Halide Only | Iodine  |         |         |      |
| 506 | TMAIHG11 | 567 | Polymer Through Anion  | Tetrahedral         | 4 | Metal Halide Only | Iodine  |         |         |      |
| 507 | TMSHGI   | 568 | Dimer Through Anion    | Tetrahedral         | 4 | Metal Halide Only | Iodine  |         |         |      |
| 508 | TMSHGI01 | 569 | Dimer Through Anion    | Tetrahedral         | 4 | Metal Halide Only | Iodine  |         |         |      |
| 509 | TMSHGI02 | 570 | Dimer Through Anion    | Tetrahedral         | 4 | Metal Halide Only | Iodine  |         |         |      |
| 510 | TOJDAX   | 571 | Discrete Molecule      | Anti-Prism          | 6 | Chelate           | M-M     | C-Donor | N-Donor | Iron |
| 511 | TORNUK   | 572 | Discrete Molecule      | Hexagonal Bipyramid | 8 | Non-Chelate       | O-Donor |         |         |      |
| 512 | TPHGD10  | 573 | Dimer Through Anion    | D-Tetrahedral (Py)  | 4 | Non-Chelate       | C-Donor |         |         |      |
| 513 | TUHGIN   | 574 | Dimer Through Anion    | Tetrahedral         | 4 | Metal Halide Only | Iodine  |         |         |      |
| 514 | TUYFUO   | 575 | Dimer Through Anion    | Tetrahedral         | 4 | Metal Halide Only | Iodine  |         |         |      |
| 515 | TUZCAT   | 576 | Dimer Through Anion    | Tetrahedral         | 4 | Metal Halide Only | Iodine  |         |         |      |
| 516 | TUZCEX   | 577 | Dimer Through Anion    | Tetrahedral         | 4 | Metal Halide Only | Iodine  |         |         |      |
| 517 | TUZCIB   | 578 | Polymer Through Anion  | Seesaw              | 4 | Metal Halide Only | Iodine  |         |         |      |
|     |          | 579 | Polymer Through Anion  | Trigonal Pyramid    | 4 | Metal Halide Only | Iodine  |         |         |      |
| 518 | UCEYIL   | 580 | Polymer Through Anion  | Seesaw              | 4 | Non-Chelate       | S-Donor |         |         |      |
| 519 | UCEYOR   | 581 | Dimer Through Anion    | Tetrahedral         | 4 | Metal Halide Only | Iodine  |         |         |      |
|     |          | 582 | Dimer Through Anion    | Linear              | 2 | Metal Halide Only | Iodine  |         |         |      |
| 520 | UFOMEH   | 583 | Polymer Through Ligand | Seesaw              | 4 | Non-Chelate       | N-Donor |         |         |      |
| 521 | UHABEK   | 584 | Dimer Through Anion    | D-Tetrahedral (Py)  | 4 | Non-Chelate       | S-Donor |         |         |      |
| 522 | UHABIO   | 585 | Discrete Molecule      | Seesaw              | 4 | Non-Chelate       | S-Donor |         |         |      |
| 523 | UHABIO01 | 586 | Discrete Molecule      | Seesaw              | 4 | Non-Chelate       | S-Donor |         |         |      |
| 524 | UHABOU   | 587 | Dimer Through Anion    | D-Tetrahedral (Py)  | 4 | Non-Chelate       | S-Donor |         |         |      |
| 525 | UJABAK   | 588 | Polymer Through Anion  | Square Pyramid      | 5 | Non-Chelate       | N-Donor |         |         |      |
|     |          | 589 | Polymer Through Ligand | D-Tetrahedral (Py)  | 4 | Non-Chelate       | N-Donor |         |         |      |
| 526 | UJEROQ   | 590 | Discrete Molecule      | T-Shape             | 5 | Non-Chelate       | O-Donor | P-Donor |         |      |
| 527 | UJEROQ01 | 591 | Discrete Molecule      | T-Shape             | 5 | Non-Chelate       | O-Donor | P-Donor |         |      |
| 528 | UJOQIT   | 592 | Polymer Through Ligand | Seesaw              | 4 | Non-Chelate       | N-Donor |         |         |      |
| 529 | UJOQIT01 | 593 | Polymer Through Ligand | Seesaw              | 4 | Non-Chelate       | N-Donor |         |         |      |
| 530 | UKOTIY   | 594 | Discrete Molecule      | Tetrahedral         | 4 | Metal Halide Only | Iodine  |         |         |      |
| 531 | ULADUG   | 595 | Dimer Through Anion    | D-Tetrahedral (Py)  | 4 | Chelate           | N-Donor |         |         |      |
| 532 | ULAFAO   | 596 | Dimer Through Ligand   | Seesaw              | 4 | Non-Chelate       | N-Donor |         |         |      |
| 533 | ULAFES   | 597 | Polymer Through Ligand | Seesaw              | 4 | Non-Chelate       | N-Donor |         |         |      |
| 534 | ULAWUA   | 598 | Polymer Through Anion  | Seesaw              | 4 | Non-Chelate       | S-Donor |         |         |      |
|     |          | 599 | Polymer Through Anion  | D-Tetrahedral (Py)  | 4 | Non-Chelate       | S-Donor |         |         |      |
| 535 | ULAXIP   | 600 | Discrete Molecule      | Seesaw              | 4 | Chelate           | N-Donor |         |         |      |
| 536 | URITIZ   | 601 | Dimer Through Ligand   | Seesaw              | 4 | Non-Chelate       | N-Donor |         |         |      |

|     |        |     |                        |                    |   |                   |                   |
|-----|--------|-----|------------------------|--------------------|---|-------------------|-------------------|
| 537 | USUXIQ | 602 | Dimer Through Anion    | D-Tetrahedral (Py) | 4 | Non-Chelate       | P-Donor           |
| 538 | UTUFIZ | 603 | Hexamer Through Anion  | Tetrahedral        | 4 | Metal Halide Only | Iodine            |
| 539 | UZEPAR | 604 | Dimer Through Anion    | D-Tetrahedral (Py) | 4 | Non-Chelate       | S-Donor           |
| 540 | UZEZIJ | 605 | discrete molecule      | Tetrahedral        | 4 | Metal Halide Only | Iodine            |
| 541 | UZEZUV | 606 | Polymer Through Ligand | Square Planar      | 4 | Non-Chelate       | C-Donor           |
|     |        | 607 | Polymer Through Ligand | Tetrahedral        | 4 | Non-Chelate       | C-Donor           |
| 542 | VALSAE | 608 | Polymer Through Ligand | D-Octahedral       | 6 | Non-Chelate       | O-donor           |
| 543 | VANDUL | 609 | Discrete Molecule      | Square Planar      | 4 | Non-Chelate       | Se-Donor          |
| 544 | VAQHOK | 610 | Dimer Through Anion    | Square Pyramid     | 4 | Chelate           | N-Donor   O-Donor |
| 545 | VARCIB | 611 | Discrete Molecule      | Seesaw             | 4 | Chelate           | N-Donor           |
| 546 | VAXGUW | 612 | Discrete Molecule      | Trigonal           | 3 | Non-Chelate       | P-Donor           |
| 547 | VAYHEK | 613 | Discrete Molecule      | Tetrahedral        | 4 | Metal Halide Only | Iodine            |
| 548 | VEGSAD | 614 | Discrete Molecule      | T-Shape            | 3 | Non-Chelate       | N-Donor           |
| 549 | VEWKOY | 615 | Trimer Through Anion   | D-Tetrahedral (Py) | 4 | Non-Chelate       | Se-Donor          |
|     |        | 616 | Trimer Through Anion   | Tetrahedral        | 4 | Non-Chelate       | Se-Donor          |
| 550 | VIQSOF | 617 | Dimer Through Anion    | D-Tetrahedral (Py) | 4 | Non-Chelate       | N-Donor           |
| 551 | VOBJUS | 618 | Discrete Molecule      | Seesaw             | 4 | Chelate           | S-Donor           |
| 552 | VOBKIH | 619 | Polymer Through Ligand | Seesaw             | 4 | Non-Chelate       | S-Donor           |
| 553 | VOSZAG | 620 | Dimer Through Anion    | Seesaw             | 4 | M-M   Non-Chelate | Rhenium           |
| 554 | VOVROP | 621 | Polymer Through Anion  | D-Tetrahedral (Py) | 4 | Non-Chelate       | S-Donor           |
| 555 | VOVSEG | 622 | Discrete Molecule      | Seesaw             | 4 | Non-Chelate       | S-Donor           |
| 556 | VUJXUU | 623 | Polymer Through Ligand | Seesaw             | 4 | Non-Chelate       | N-Donor           |
| 557 | VUJYUV | 624 | Polymer Through Anion  | D-Tetrahedral (Py) | 4 | Non-Chelate       | N-Donor           |
| 558 | VUPWUZ | 625 | Dimer Through Ligand   | D-Tetrahedral (Py) | 4 | Non-Chelate       | S-Donor           |
|     |        | 626 | Discrete Molecule      | T-Shape            | 3 | Non-Chelate       | S-Donor           |
| 559 | VUPXEK | 627 | Discrete Molecule      | Seesaw             | 4 | Non-Chelate       | S-Donor           |
| 560 | VUVNIK | 628 | Discrete Molecule      | Seesaw             | 4 | Chelate           | P-Donor           |
| 561 | WAHJIB | 629 | Discrete Molecule      | T-Shape            | 5 | Non-Chelate       | N-Donor           |
| 562 | WAPKII | 630 | Polymer Through Ligand | Seesaw             | 4 | Non-Chelate       | N-Donor           |
| 563 | WAXROC | 631 | Polymer Through Anion  | Tetrahedral        | 4 | Metal Halide Only | Iodine            |
| 564 | WECBAH | 632 | Dimer Through Anion    | D-Tetrahedral (Py) | 4 | Non-Chelate       | P-Donor           |
| 565 | WECBEL | 633 | Dimer Through Anion    | Tetrahedral        | 4 | Non-Chelate       | P-Donor           |
|     |        | 634 | Dimer Through Anion    | Seesaw             | 4 | Non-Chelate       | P-Donor           |
| 566 | WEFREF | 635 | Discrete Molecule      | T-Shape            | 5 | Non-Chelate       | N-Donor   O-Donor |
| 567 | WENSAK | 636 | Polymer Through Anion  | Tetrahedral        | 4 | Metal Halide Only | Iodine            |
|     |        | 637 | Polymer Through Anion  | Seesaw             | 4 | Metal Halide Only | Iodine            |
| 568 | WEQMOV | 638 | Polymer Through Ligand | Seesaw             | 4 | Non-Chelate       | N-Donor           |
| 569 | WIDZOY | 639 | Dimer Through Anion    | D-Tetrahedral (Py) | 4 | Non-Chelate       | S-Donor           |
| 570 | WIFZOB | 640 | Dimer Through Ligand   | Seesaw             | 4 | Non-Chelate       | Se-Donor          |
| 571 | WIHLAB | 641 | Discrete Molecule      | Seesaw             | 4 | Non-Chelate       | S-Donor           |
| 572 | WODDEY | 642 | Discrete Molecule      | Seesaw             | 4 | Non-Chelate       | S-Donor           |
| 573 | WONKOZ | 643 | Discrete Molecule      | Seesaw             | 4 | Non-Chelate       | P-Donor   O-Donor |
| 574 | WOPCEJ | 644 | Trimer Through Anion   | Tetrahedral        | 4 | Metal Halide Only | Iodine            |
| 575 | WOPCIN | 645 | Polymer Through Anion  | Tetrahedral        | 4 | Metal Halide Only | Iodine            |
| 576 | WUNXOU | 646 | Dimer Through Ligand   | Seesaw             | 4 | Non-Chelate       | N-Donor           |
| 577 | WURPUV | 647 | Dimer Through Anion    | Tetrahedral        | 4 | Metal Halide Only | Iodine            |
| 578 | WURXOW | 648 | Discrete Molecule      | Tetrahedral        | 4 | Metal Halide Only | Iodine            |
| 579 | WUZHIJ | 649 | Polymer Through Ligand | Seesaw             | 4 | Non-Chelate       | N-Donor           |
| 580 | XAHSEF | 650 | Dimer Through Ligand   | Seesaw             | 4 | Non-Chelate       | N-Donor           |
| 581 | XAHSUV | 651 | Polymer Through Ligand | Seesaw             | 4 | Non-Chelate       | N-Donor           |
| 582 | XAHWAF | 652 | Discrete Molecule      | Tetrahedral        | 4 | Metal Halide Only | Iodine            |
| 583 | XALBAP | 653 | Dimer Through Ligand   | Seesaw             | 4 | Non-Chelate       | N-Donor           |
| 584 | XANBIX | 654 | Polymer Through Ligand | D-Square Pyramid   | 5 | Chelate           | N-Donor   O-Donor |
|     |        | 655 | Polymer Through Anion  | D-Square Pyramid   | 5 | Chelate           | N-Donor   O-Donor |
| 585 | XAQCID | 656 | Dimer Through Anion    | Tetrahedral        | 4 | Metal Halide Only | Iodine            |
| 586 | XAQCOJ | 657 | Discrete Molecule      | Tetrahedral        | 4 | Metal Halide Only | Iodine            |
| 587 | XEHWOY | 658 | Polymer Through Ligand | D-Tetrahedral (Py) | 4 | Chelate           | N-Donor           |
|     |        | 659 | Polymer Through Ligand | T-Shape            | 5 | Chelate           | N-Donor   O-Donor |
| 588 | XEHWUE | 660 | Discrete Molecule      | T-Shape            | 5 | Chelate           | N-Donor   O-Donor |
| 589 | XEHXAL | 661 | Discrete Molecule      | T-Shape            | 5 | Chelate           | N-Donor   O-Donor |
| 590 | XELQEL | 662 | Polymer Through Ligand | D-Tetrahedral (Py) | 4 | Non-Chelate       | S-Donor           |
| 591 | XEMVES | 663 | Dimer Through Anion    | Tetrahedral        | 4 | Metal Halide Only | Iodine            |

|     |        |     |                        |                      |   |                   |                   |
|-----|--------|-----|------------------------|----------------------|---|-------------------|-------------------|
| 592 | XENFAZ | 664 | Discrete Molecule      | Tetrahedral          | 4 | Metal Halide Only | Iodine            |
| 593 | XEWKIU | 665 | Discrete Molecule      | Linear               | 2 | Metal Halide Only | Iodine            |
| 594 | XEWKOA | 666 | Dimer Through Anion    | D-Tetrahedral (Py)   | 4 | Non-Chelate       | N-Donor           |
| 595 | XEWKUG | 667 | Dimer Through Anion    | D-Trigonal Bipyramid | 5 | Chelate           | N-Donor           |
| 596 | XIDDOF | 668 | Discrete Molecule      | Tetrahedral          | 4 | Metal Halide Only | Iodine            |
|     |        | 669 | Trimer Through Anion   | T-Shape              | 3 | Chelate           | C-Donor   N-Donor |
| 597 | XIHZOE | 670 | Polymer Through Ligand | Seesaw               | 4 | Non-Chelate       | N-Donor           |
| 598 | XIPNER | 671 | Discrete Molecule      | Seesaw               | 4 | Non-Chelate       | N-Donor           |
| 599 | XIPVUO | 672 | Polymer Through Anion  | Seesaw               | 4 | Non-Chelate       | N-Donor           |
|     |        | 673 | Polymer Through Ligand | Seesaw               | 4 | Non-Chelate       | N-Donor           |
| 600 | XITLUI | 674 | Dimer Through Anion    | Tetrahedral          | 4 | Metal Halide Only | Iodine            |
| 601 | XOGKIN | 675 | Discrete Molecule      | Trigonal Pyramid     | 4 | Metal Halide Only | Chlorine          |
|     |        | 676 | Discrete Molecule      | Trigonal             | 3 | Metal Halide Only | Iodine            |
| 602 | XORVIK | 677 | Dimer Through Anion    | D-Tetrahedral (Py)   | 4 | Non-Chelate       | N-Donor           |
| 603 | XOYHAW | 678 | Discrete Molecule      | Tetrahedral          | 4 | Metal Halide Only | Iodine            |
|     |        | 679 | Dimer Through Anion    | Trigonal Bipyramid   | 5 | Chelate           | N-Donor           |
| 604 | XOYHEA | 680 | Dimer Through Ligand   | Seesaw               | 4 | Chelate           | N-Donor           |
|     |        | 681 | Dimer Through Ligand   | T-Shape              | 5 | Chelate           | N-Donor           |
| 605 | XUCWEY | 682 | Discrete Molecule      | Seesaw               | 4 | Chelate           | N-Donor           |
| 606 | XUKRUS | 683 | Tetramer Through Anion | Square Pyramid       | 5 | M-M   Non-Chelate | Osmium            |
| 607 | XUVRIQ | 684 | Discrete Molecule      | Trigonal             | 3 | Metal Halide Only | Iodine            |
|     |        | 685 | Discrete Molecule      | D-Tetrahedral (Py)   | 4 | Metal Halide Only | Chlorine          |
| 608 | XUZLIO | 686 | Discrete Molecule      | Tetrahedral          | 4 | Metal Halide Only | Iodine            |
| 609 | YACFAL | 687 | Polymer Through Ligand | Seesaw               | 4 | Non-Chelate       | N-Donor           |
| 610 | YAWKIQ | 688 | Tetramer Through Anion | T-Shape              | 3 | Non-Chelate       | C-Donor           |
|     |        | 689 | Tetramer Through Anion | Seesaw               | 4 | Non-Chelate       | C-Donor           |
| 611 | YIJREQ | 690 | Discrete Molecule      | Seesaw               | 4 | Chelate           | C-Donor   P-Donor |
| 612 | YIVJES | 691 | Trimer Through Anion   | Tetrahedral          | 4 | Metal Halide Only | Iodine            |
| 613 | YIYSUV | 692 | Dimer Through Anion    | D-Tetrahedral (Py)   | 4 | Non-Chelate       | C-Donor           |
| 614 | YIYWOT | 693 | Dimer Through Anion    | D-Tetrahedral (Py)   | 4 | Non-Chelate       | C-Donor           |
| 615 | YOCZUM | 694 | Polymer Through Ligand | Seesaw               | 4 | Non-Chelate       | N-Donor           |
| 616 | YOGSES | 695 | Dimer Through Anion    | Tetrahedral          | 4 | Metal Halide Only | Iodine            |
| 617 | YOLMES | 696 | Discrete Molecule      | Tetrahedral          | 4 | Metal Halide Only | Iodine            |
| 618 | YOWYEQ | 697 | Dimer Through Anion    | Tetrahedral          | 4 | Metal Halide Only | Iodine            |
| 619 | YOZDUO | 698 | Dimer Through Ligand   | Seesaw               | 4 | Non-Chelate       | S-Donor           |
| 620 | YOZFAW | 699 | Discrete Molecule      | Seesaw               | 4 | Non-Chelate       | S-Donor           |
| 621 | YUMCEO | 700 | Polymer Through Ligand | Seesaw               | 4 | Non-Chelate       | N-Donor           |
| 622 | YUNFOD | 701 | Polymer Through Ligand | Seesaw               | 4 | Non-Chelate       | N-Donor           |
| 623 | YUNGIY | 702 | Discrete Molecule      | Seesaw               | 4 | Chelate           | N-Donor           |
| 624 | YUPBUH | 703 | Polymer Through Anion  | Seesaw               | 4 | Non-Chelate       | N-Donor           |
|     |        | 704 | Polymer Through Ligand | Trigonal Bipyramid   | 5 | Non-Chelate       | N-Donor           |
|     |        | 705 | Polymer Through Ligand | Seesaw               | 4 | Non-Chelate       | N-Donor           |
| 625 | YUQNEF | 706 | Polymer Through Ligand | Tetrahedral          | 4 | Metal Halide Only | Iodine            |
|     |        | 707 | Polymer Through Anion  | Tetrahedral          | 4 | Metal Halide Only | Iodine            |
| 626 | YUYVUK | 708 | Polymer Through Ligand | Seesaw               | 4 | Non-Chelate       | P-Donor           |
| 627 | ZECBAK | 709 | Dimer Through Anion    | Tetrahedral          | 4 | Metal Halide Only | Iodine            |
| 628 | ZEFREJ | 710 | Polymer Through Ligand | Seesaw               | 4 | Non-Chelate       | N-Donor           |
| 629 | ZESPIW | 711 | Dimer Through Anion    | D-Tetrahedral (Py)   | 4 | Non-Chelate       | C-Donor           |
| 630 | ZEVMAQ | 712 | Polymer Through Anion  | Seesaw               | 4 | Chelate           | N-Donor           |
|     |        | 713 | Polymer Through Anion  | Seesaw               | 4 | Metal Halide Only | Iodine            |
|     |        | 714 | Polymer Through Anion  | Octahedral           | 6 | Metal Halide Only | Iodine            |
| 631 | ZEXJER | 715 | Polymer Through Ligand | Seesaw               | 4 | Non-Chelate       | N-Donor           |
| 632 | ZINWIE | 716 | Polymer Through Ligand | Seesaw               | 4 | Non-Chelate       | N-Donor           |
| 633 | ZIYXEK | 717 | Discrete Molecule      | Hexagonal Bipyramid  | 8 | Non-Chelate       | O-Donor           |
| 634 | ZOGWIB | 718 | Dimer Through Anion    | Square Pyramid       | 5 | Chelate           | N-Donor           |
| 635 | ZOZRUD | 719 | Polymer Through Ligand | Seesaw               | 4 | Non-Chelate       | N-Donor           |
| 636 | ZUBMAK | 720 | Tetramer Through Anion | T-Shape              | 3 | Chelate           | C-Donor           |
|     |        | 721 | Tetramer Through Anion | Seesaw               | 4 | Chelate           | C-Donor           |
| 637 | ZUBMEO | 722 | Tetramer Through Anion | Seesaw               | 4 | Chelate           | C-Donor           |
